# Supplementary material for: Catalytic Asymmetric Michael Reaction of Methyl Alkynyl Ketone Catalyzed by Diphenylprolinol Silyl Ether
Source: PubMed Central journal article supplement — ACS Org Inorg Au. 2022 Jan 26;2(3):245–51. doi: 10.1021/acsorginorgau.1c00054 (PMC9954212; doi:10.1021/acsorginorgau.1c00054), 2022-01-26

# Catalytic asymmetric Michael reaction of methyl alkynyl ketone catalyzed by diphenylprolinol silyl ether

Nariyoshi Umekubo, Yujiro Hayashi\*

Department of Chemistry, Graduate School of Science, Tohoku University 6-3 Aramaki-Aza Aoba-ku,  
Sendai, Miyagi 980-8579, Japan

## SUPPORTING INFORMATION

Experimental procedures and Characterization data

### Table of Contents

|                                                                                                           |               |
|-----------------------------------------------------------------------------------------------------------|---------------|
| 1. Materials and Methods.....                                                                             | Page S2       |
| 2. Experimental Procedures.....                                                                           | Page S3-S19   |
| 2. 1. Typical procedure of asymmetric Michael reaction using alkynyl ketone.....                          | Page S3       |
| 2. 2. Compounds information.....                                                                          | Page S3- S7   |
| 2. 3. Typical procedure of Wittig reaction to determine the value of <i>ee</i> .....                      | Page S7       |
| 2. 4. Compounds information.....                                                                          | Page S7-S12   |
| 2. 5. One-pot procedure of providing compound <b>10</b> from compound <b>1</b> and compound <b>2g</b> ... | Page S12-S13  |
| 2. 6. One-pot procedure of providing compound <b>6</b> from compound <b>10</b> .....                      | Page S13-S14  |
| 2. 7. Lindlar reduction of compound <b>6</b> to determine its absolute configuration.....                 | Page S14- S15 |
| 2. 8. Preparation of compound <b>8</b> .....                                                              | Page S15- S16 |
| 2. 9. Stereo-selective reduction of compound <b>8</b> .....                                               | Page S16- S17 |
| 2. 10. Deprotection of compound <b>9</b> .....                                                            | Page S17- S18 |
| 2. 11. Oxidation of compound <b>SI-1</b> .....                                                            | Page S18- S19 |
| 2.12. Reduction & intramolecular lactonization of compound <b>16</b> .....                                | Page S19      |
| 2.13. A side-reaction in asymmetric Michael reaction.....                                                 | Page S19- S20 |
| 2.14. Compounds information about side-product.....                                                       | Page S20- S21 |
| 3. References.....                                                                                        | Page S21      |
| Spectra for Compounds.....                                                                                | Page S22-S118 |

## 1. Materials and Methods

### General Methods.

General Remarks: All reactions were carried out under argon atmosphere and monitored by thin-layer chromatography using Merck 60 F254 precoated silica gel plates (0.25 mm thickness). Specific optical rotations were measured using a JASCO P-1020 polarimeter and a JASCO DIP-370 polarimeter. FT-IR spectra were recorded on a JASCO FT/IR-410 spectrometer and a Perkin Elmer spectrum BX FT-IP spectrometer.  $^1\text{H}$  and  $^{13}\text{C}$  NMR spectra were recorded on an Agilent-400 MR (400 MHz for  $^1\text{H}$  NMR, 100 MHz for  $^{13}\text{C}$  NMR) instrument. Data for  $^1\text{H}$  NMR are reported as chemical shift ( $\delta$  ppm), integration multiplicity (s = singlet, d = doublet, t = triplet, q = quartet, quintet = quin, septet = sep, dd = doublet of doublets, ddd = doublet of doublet of doublets, dt = double of triplets, td = triplet of doublets, m = multiplet, brs = broad singlet), coupling constant (Hz), Data for  $^{13}\text{C}$  NMR are reported as chemical shift. High resolution ESI-TOF mass spectra were measured by Thermo Orbi-trap instrument. HPLC analysis was performed on a HITACHI Elite LaChrom Series HPLC, UV detection monitored at appropriate wavelength respectively, using CHIRALPACK<sup>®</sup> IG (0.46 cm  $\times$  25 cm).

## 2. Experimental Procedures

### 2.1. Typical procedure of asymmetric Michael reaction using alkynyl ketone

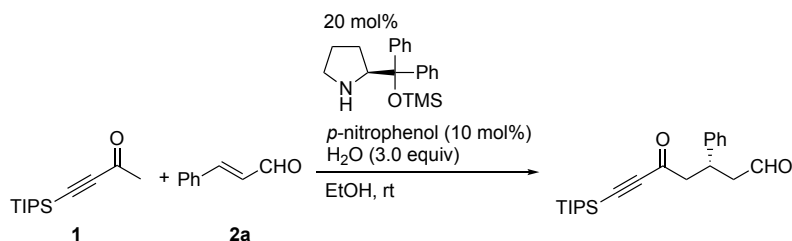

To a solution of cinnamaldehyde **1** (23.5 mg, 0.18 mmol) and 4-(triisopropylsilyl)but-3-yn-2-one **2a** (33.7 mg, 0.15 mmol) in EtOH (600  $\mu$ L), H<sub>2</sub>O (8.1  $\mu$ L, 0.45 mmol), diphenylprolinol silyl ether (9.7 mg, 0.030 mmol), *p*-nitrophenol (2.1 mg, 0.015 mmol) were added at room temperature. After stirred the reaction mixture at this temperature for 3 hours, its solvent was removed under reduced pressure. The residue was directly purified by column chromatography on silica gel (*n*-Hexane: EtOAc = 12:1) to give the target compound (37.1 mg, 0.104 mmol) in 69% yield.

### 2.2. Compounds information

#### (R)-5-Oxo-3-phenyl-7-(triisopropylsilyl)hept-6-ynal (**3a**)

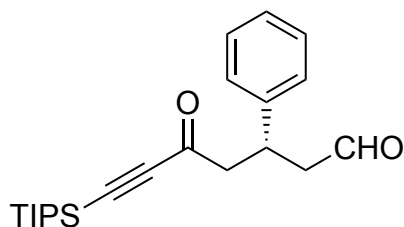

**Yield:** 69% (36.8 mg)

**Physical State:** Yellow oil

**<sup>1</sup>H NMR (CDCl<sub>3</sub>)**  $\delta$  1.05-1.15 (m, 21H), 2.79-2.82 (m, 2H), 2.95 (d,  $J = 7.2$  Hz, 2H), 3.90 (quin,  $J = 7.2$ , 1H), 7.20-7.24 (m, 3H), 7.29-7.33 (m, 2H), 9.66 (t,  $J = 2.0$  Hz, 1H)

**<sup>13</sup>C NMR (CDCl<sub>3</sub>)**  $\delta$  200.4, 185.1, 142.1, 128.9, 128.9, 127.3, 127.1, 127.1, 104.0, 96.7, 51.6, 49.3, 35.9, 18.5, 18.5, 18.5, 18.5, 18.5, 10.9, 10.9, 10.9

**HRMS (ESI):** [M+Na]<sup>+</sup> calcd for C<sub>22</sub>H<sub>32</sub>O<sub>2</sub>SiNa: 379.2064, found: 379.2064

**IR(neat)**  $\nu$  2145, 1726, 1677, 1463, 1386, 1222, 1116, 1073, 997, 883, 7000, 679, 586, 457, 410 cm<sup>-1</sup>

$[\alpha]_D^{26}$  -20.1 ( $c$  2.0, CHCl<sub>3</sub>)

**R<sub>f</sub>**(*n*-Hexane: EtOAc = 3:1, color reagent: Hanessian's stain reagent): 0.40

**(R)-3-(4-Methoxyphenyl)-5-oxo-7-(triisopropylsilyl)hept-6-ynal (3b)**

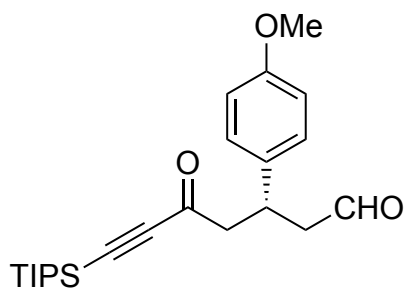

**Yield:** 68% (39.3 mg)

**Physical State:** Yellow oil

**<sup>1</sup>H NMR (CDCl<sub>3</sub>)** δ 1.06-1.15 (m, 21H), 2.75-2.78 (m, 2H), 2.92 (d, *J* = 7.2 Hz, 2H), 3.77 (s, 3H), 3.85 (quin, *J* = 7.2 Hz, 1H), 6.83 (d, *J* = 8.8 Hz, 2H), 7.14 (d, *J* = 8.8 Hz, 2H), 9.65 (t, *J* = 2.0 Hz, 1H)

**<sup>13</sup>C NMR (CDCl<sub>3</sub>)** δ 200.7, 185.3, 158.6, 134.1, 128.3, 128.3, 114.2, 114.2, 104.1, 96.6, 55.2, 51.9, 49.5, 34.9, 18.5, 18.5, 18.5, 18.5, 18.5, 18.5, 11.0, 11.0, 11.0

**HRMS (ESI):** [M+Na]<sup>+</sup> calcd for C<sub>23</sub>H<sub>34</sub>O<sub>3</sub>SiNa: 409.2169, found: 409.2169

**IR(neat)**ν 2145, 1726, 1677, 1463, 1386, 1222, 1116, 1073, 997, 883, 7000, 679, 586, 457, 410 cm<sup>-1</sup>

[α]<sub>D</sub><sup>26</sup> -15.5 (*c* 1.5, CHCl<sub>3</sub>)

**R<sub>f</sub>**(*n*-Hexane: EtOAc =3:1, color reagent: Hanessian's stain reagent): 0.20

**(R)-3-(4-Bromophenyl)-5-oxo-7-(triisopropylsilyl)hept-6-ynal (3c)**

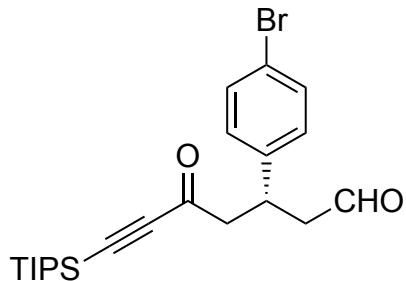

**Yield:** 61% (37.9 mg)

**Physical State:** Yellow oil

**<sup>1</sup>H NMR (CDCl<sub>3</sub>, 400 MHz)** δ 1.06-1.11 (m, 21H), 2.80 (dt, *J* = 1.6, 6.8 Hz, 2H), 2.92 (dd, *J* = 2.4, 7.2 Hz, 2H), 3.86 (quin, *J* = 7.2 Hz, 1H), 7.11 (d, *J* = 8.4 Hz, 2H), 7.42 (d, *J* = 8.4 Hz, 2H), 9.66 (t, *J* = 1.2 Hz, 1H)

**<sup>13</sup>C NMR (CDCl<sub>3</sub>, 100 MHz)** δ 199.8, 188.9, 141.2, 132.0, 132.0, 129.1, 129.1, 121.0, 104.0, 91.6, 51.3, 49.2, 34.9, 18.5, 18.5, 18.5, 18.5, 18.5, 18.5, 11.0, 11.0, 11.0

**HRMS (ESI):** [M+Na]<sup>+</sup> calcd for C<sub>22</sub>H<sub>31</sub>BrO<sub>2</sub>SiNa: 457.1169, found: 457.1172

**IR(neat)**ν 2145, 1726, 1677, 1489, 1463, 1118, 1074, 1011, 883, 821, 681, 404 cm<sup>-1</sup>

[α]<sub>D</sub><sup>26</sup> -19.5 (*c* 1.7, CHCl<sub>3</sub>)

**R<sub>f</sub>**(*n*-Hexane: EtOAc =3:1, color reagent: Hanessian's stain reagent): 0.45



**(R)-3-(3-Bromophenyl)-5-oxo-7-(triisopropylsilyl)hept-6-ynal (3d)**

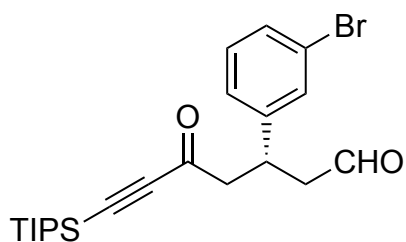

**Yield:** 64% (41.6 mg)

**Physical State:** Yellow oil

**<sup>1</sup>H NMR (CDCl<sub>3</sub>, 400 MHz)** δ 1.06-1.17 (m, 21H), 2.81 (ddd, *J* = 1.6, 5.6, 7.2 Hz, 2H), 2.93 (dd, *J* = 1.2, 6.8 Hz, 2H), 3.86 (quin, *J* = 7.2 Hz, 1H), 7.16-7.18 (m, 2H), 7.34-7.38 (m, 2H), 9.70 (t, *J* = 1.6 Hz, 1H)

**<sup>13</sup>C NMR (CDCl<sub>3</sub>, 100 MHz)** δ 199.7, 184.6, 144.6, 130.5, 130.4, 130.3, 126.2, 122.9, 103.9, 97.1, 51.2, 49.1, 35.0, 18.5, 18.5, 18.5, 18.5, 18.5, 18.5, 11.0, 11.0, 11.0

**HRMS (ESI):** [M+Na]<sup>+</sup> calcd for C<sub>22</sub>H<sub>31</sub>BrO<sub>2</sub>SiNa: 457.1169, found: 457.1173

**IR(neat)**ν 2145, 1726, 1677, 1568, 1463, 1428, 1221, 1117, 1074, 997, 882, 784, 679, 587, 440, 408 cm<sup>-1</sup>  
[α]<sub>D</sub><sup>26</sup> -38.5 (*c* 0.50, CHCl<sub>3</sub>)

**R<sub>f</sub>**(*n*-Hexane: EtOAc = 3:1, color reagent: Hanessian's stain reagent): 0.45

**(R)-3-(2-Bromophenyl)-5-oxo-7-(triisopropylsilyl)hept-6-ynal (3e)**

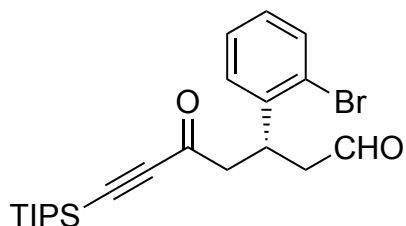

**Yield:** 70% (45.6 mg)

**Physical State:** Yellow oil

**<sup>1</sup>H NMR (CDCl<sub>3</sub>, 400 MHz)** δ 1.07-1.15 (m, 21H), 2.85 (dd, *J* = 1.6, 7.2 Hz, 2H), 2.94 (dd, *J* = 8.0, 17.6 Hz, 1H), 3.03 (dd, *J* = 6.0, 16.8 Hz, 1H), 4.37 (quin, *J* = 7.2 Hz, 1H), 7.09 (dt, *J* = 2.0, 8.0 Hz, 1H), 7.21 (dd, *J* = 1.6, 8.0 Hz, 1H), 7.28 (dt, *J* = 1.2, 7.6 Hz, 1H), 7.56 (dd, *J* = 1.2, 8.0 Hz, 1H), 9.68 (t, *J* = 1.6 Hz, 1H)

**<sup>13</sup>C NMR (CDCl<sub>3</sub>, 100 MHz)** δ 200.1, 184.8, 140.8, 133.5, 128.6, 128.1, 127.9, 124.3, 103.8, 96.9, 49.8, 47.9, 34.5, 18.5, 18.5, 18.5, 18.5, 18.5, 18.5, 11.0, 11.0, 11.0

**HRMS (ESI):** [M+Na]<sup>+</sup> calcd for C<sub>22</sub>H<sub>31</sub>BrO<sub>2</sub>SiNa: 457.1169, found: 457.1170

**IR(neat)**ν 2146, 1726, 1676, 1470, 1223, 1110, 1022, 883, 755, 681, 585, 450 cm<sup>-1</sup>  
[α]<sub>D</sub><sup>26</sup> +3.40 (*c* 1.9, CHCl<sub>3</sub>)

**R<sub>f</sub>**(*n*-Hexane: EtOAc = 3:1, color reagent: Hanessian's stain reagent): 0.45

**(R)-3-(Furan-2-yl)-5-oxo-7-(triisopropylsilyl)hept-6-ynal (3f)**

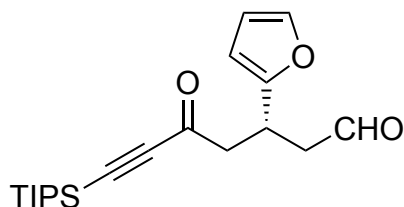

**Yield:** 78% (40.8 mg)

**Physical State:** Yellow oil

**<sup>1</sup>H NMR (CDCl<sub>3</sub>, 400 MHz)** δ 1.04-1.17 (m, 21H), 2.79 (dt, *J* = 1.6, 5.6 Hz, 2H), 2.90 (dd, *J* = 7.6, 17.2 Hz, 1H), 3.02 (dd, *J* = 6.8, 16.8 Hz, 1H), 3.99 (quin, *J* = 7.6 Hz, 1H), 6.06 (d, *J* = 3.2 Hz, 1H), 6.26 (dd, *J* = 1.6, 3.2 Hz, 1H), 7.30 (t, *J* = 0.80 Hz, 1H), 9.72 (t, *J* = 2.0 Hz, 1H)

**<sup>13</sup>C NMR (CDCl<sub>3</sub>, 100 MHz)** δ 200.1, 184.7, 154.9, 141.7, 110.2, 105.9, 103.8, 96.9, 48.7, 46.6, 29.0, 18.5, 18.5, 18.5, 18.5, 18.5, 10.9, 10.9, 10.9

**HRMS (ESI):** [M+Na]<sup>+</sup> calcd for C<sub>20</sub>H<sub>30</sub>O<sub>3</sub>SiNa: 369.1856, found: 369.1858

**IR(neat)**ν 2146, 1727, 1679, 1464, 1218, 1115, 1072, 1015, 883, 734, 681, 597 cm<sup>-1</sup>

[α]<sub>D</sub><sup>26</sup> -4.41 (*c* 1.5, CHCl<sub>3</sub>)

**R<sub>f</sub>**(*n*-Hexane: EtOAc =3:1, color reagent: Hanessian's stain reagent): 0.20

**(R)-3-(Dimethyl(phenyl)silyl)-5-oxo-7-(triisopropylsilyl)hept-6-ynal (3g)**

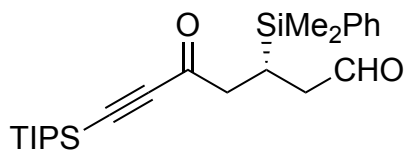

**Yield:** 71% (44.1 mg)

**Physical State:** Yellow oil

**<sup>1</sup>H NMR (CDCl<sub>3</sub>, 400 MHz)** δ 0.33 (s, 6H), 1.08-1.12 (m, 21H), 2.01-2.16 (m, 1H), 2.34 (ddd, *J* = 2.0, 8.0, 17.6 Hz, 1H), 2.49 (dd, *J* = 9.6, 16.8 Hz, 1H), 2.50 (ddd, *J* = 1.6, 5.6, 17.6 Hz, 1H), 2.69 (dd, *J* = 4.8, 16.8 Hz, 1H), 7.34-7.39 (m, 3H), 7.47-7.50 (m, 2H), 9.62 (t, *J* = 1.2 Hz, 1H)

**<sup>13</sup>C NMR (CDCl<sub>3</sub>, 100 MHz)** δ 201.5, 187.1, 136.2, 133.9, 133.9, 129.5, 128.0, 128.0, 104.0, 96.4, 46.0, 44.1, 18.5, 18.5, 18.5, 18.5, 18.5, 18.5, 15.4, 11.0, 11.0, 11.0, -4.37, -4.46

**HRMS (ESI):** [M+Na]<sup>+</sup> calcd for C<sub>24</sub>H<sub>38</sub>O<sub>2</sub>Si<sub>2</sub>Na: 437.2303, found: 437.2303

**IR(neat)**ν 2145, 1725, 1677, 1462, 1427, 1253, 1212, 1112, 1069, 997, 883, 836, 778, 736, 701, 681, 471 cm<sup>-1</sup>

1

[α]<sub>D</sub><sup>26</sup> -5.02 (*c* 1.5, CHCl<sub>3</sub>)

**R<sub>f</sub>**(*n*-Hexane: EtOAc =3:1, color reagent: Hanessian's stain reagent): 0.50

**(R)-3-Methyl-5-oxo-7-(triisopropylsilyl)hept-6-ynal (3h)**

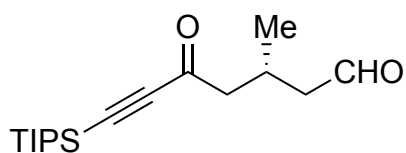

**Yield:** 55% (24.3 mg)

**Physical State:** Colorless oil

**<sup>1</sup>H NMR (CDCl<sub>3</sub>, 400 MHz)** δ 1.04 (d, *J* = 6.8 Hz, 3H), 1.08-1.16 (m, 21H), 2.35 (ddd, *J* = 2.4, 8.0, 17.2 Hz, 1H), 2.48-2.60 (m, 2H), 2.60-2.66 (dd, *J* = 6.4, 16.4 Hz, 1H), 2.72 (quin, *J* = 6.8 Hz, 1H), 9.75 (t, *J* = 1.6 Hz, 1H)

**<sup>13</sup>C NMR (CDCl<sub>3</sub>, 100 MHz)** δ 201.3, 186.2, 104.2, 96.2, 51.9, 50.0, 24.6, 20.0, 18.5, 18.5, 18.5, 18.5, 18.5, 18.5, 10.8, 10.8, 10.8

**HRMS (ESI):** [M+Na]<sup>+</sup> calcd for C<sub>17</sub>H<sub>30</sub>O<sub>2</sub>SiNa: 317.1907, found: 317.1907

**IR(neat)**ν 2145, 1726, 1673, 1463, 1163, 1072, 996, 918, 883, 701, 680, 505 cm<sup>-1</sup>

[α]<sub>D</sub><sup>26</sup> +20.6 (*c* 0.20, CHCl<sub>3</sub>)

**R<sub>f</sub>**(*n*-Hexane: EtOAc = 3:1, color reagent: Hanessian's stain reagent): 0.60

**2.3. Typical procedure of Wittig reaction to determine the value of *ee***

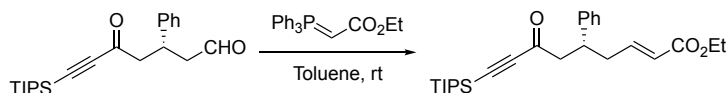

To a solution of aldehyde (37.1 mg, 0.10 mmol) in toluene (300 μL), Ph<sub>3</sub>P=CHCO<sub>2</sub>Et (69.6 mg, 0.20 mmol) was added at room temperature. After stirring the reaction mixture at this temperature for 1 hour, the reaction mixture was directly purified by column chromatography on silica gel (*n*-Hexane: EtOAc = 3:1) to give the target compound.

The enantiomeric ratio was determined by HPLC using CHIRALPACK® IG (*n*-Hexane: *i*-PrOH = 66:1; flow rate 1.0 ml/min, major isomer *t<sub>R</sub>* = 12.7 min, minor isomer *t<sub>R</sub>* = 24.9 min) (95% *ee*).

**2.4. Compounds information**

**Ethyl (R,E)-7-oxo-5-phenyl-9-(triisopropylsilyl)non-2-en-8-ynoate**

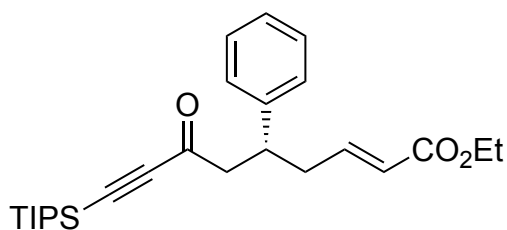

**Yield:** 73% (31.2 mg)

**Physical State:** Yellow oil

**<sup>1</sup>H NMR (CDCl<sub>3</sub>, 400 MHz)** δ 0.94-1.17 (m, 21H), 1.25 (t, *J* = 7.2 Hz, 3H), 2.51-2.60 (m, 2H), 2.90 (d, *J* = 3.6 Hz, 2H), 3.48 (quin, *J* = 7.2 Hz, 1H), 4.14 (q, *J* = 7.2 Hz, 2H), 5.78 (d, *J* = 15.6 Hz, 1H), 6.78 (dd, *J* = 7.6, 15.6 Hz, 1H), 7.17-7.23 (m, 2H), 7.26-7.32 (m, 3H)

**<sup>13</sup>C NMR (CDCl<sub>3</sub>, 100 MHz)** δ 185.6, 166.2, 145.6, 142.3, 128.7, 128.7, 127.4, 127.4, 127.0, 123.5, 104.1, 96.5, 60.2, 51.5, 40.7, 38.6, 18.5, 18.5, 18.5, 18.5, 18.5, 18.5, 14.2, 11.0, 11.0, 11.0

**HRMS (ESI):** [M+Na]<sup>+</sup> calcd for C<sub>26</sub>H<sub>38</sub>O<sub>3</sub>SiNa: 449.2482, found: 449.2480

**IR(neat)**ν 2145, 1721, 1677, 1463, 1367, 1264, 1207, 1160, 1109, 1075 1041, 997, 883, 838, 762, 700, 679 cm<sup>-1</sup>

[α]<sub>D</sub><sup>26</sup> -7.14 (*c* 1.8, CHCl<sub>3</sub>)

**R<sub>f</sub>**(*n*-Hexane: EtOAc =3:1, color reagent: Hanessian's stain reagent): 0.40

The enantiomeric ratio was determined by HPLC using CHIRALPACK® IG (*n*-Hexane: *i*-PrOH = 66:1; flow rate 1.0 ml/min, major isomer *t<sub>R</sub>* = 12.7 min, minor isomer *t<sub>R</sub>* = 24.9 min) (95% *ee*).

### Ethyl (*R,E*)-5-(4-methoxyphenyl)-7-oxo-9-(triisopropylsilyl)non-2-en-8-ynoate

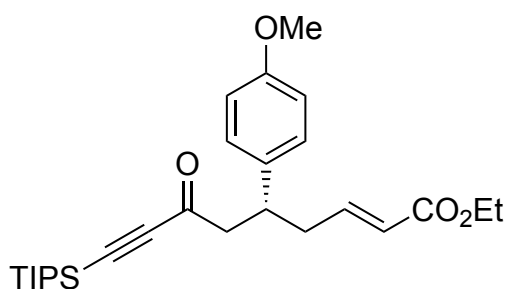

**Yield:** 80% (36.5 mg)

**Physical State:** Yellow oil

**<sup>1</sup>H NMR (CDCl<sub>3</sub>, 400 MHz)** δ 1.04-1.17 (m, 21H), 1.25 (t, *J* = 7.2 Hz, 3H), 2.45-2.58 (m, 2H), 2.85 (d, *J* = 7.6 Hz, 2H), 3.43 (quin, *J* = 7.2 Hz, 1H), 3.78 (s, 3H), 4.14 (q, *J* = 7.2 Hz, 2H), 5.76 (d, *J* = 15.6 Hz, 1H), 6.79 (td, *J* = 7.2, 15.6 Hz, 1H), 6.82 (d, *J* = 8.8 Hz, 2H), 7.09 (d, *J* = 8.8 Hz, 2H)

**<sup>13</sup>C NMR (CDCl<sub>3</sub>, 100 MHz)** δ 185.8, 166.2, 158.4, 145.8, 134.3, 128.3, 128.3, 123.4, 114.1, 114.1, 104.2, 96.5, 60.2, 55.2, 51.8, 40.0, 38.8, 18.5, 18.5, 18.5, 18.5, 18.5, 18.5, 14.2, 11.0, 11.0, 11.0

**HRMS (ESI):** [M+Na]<sup>+</sup> calcd for C<sub>27</sub>H<sub>40</sub>O<sub>4</sub>SiNa: 479.2588, found: 479.2593

**IR(neat)**ν 2146, 1718, 1675, 1513, 1458, 1251, 1038, 827, 419 cm<sup>-1</sup>

[α]<sub>D</sub><sup>26</sup> -2.84 (*c* 0.20, CHCl<sub>3</sub>)

**R<sub>f</sub>**(*n*-Hexane: EtOAc =3:1, color reagent: Hanessian's stain reagent): 0.20

The enantiomeric ratio was determined by HPLC using CHIRALPACK® IG (*n*-Hexane: *i*-PrOH = 66:1; flow rate 1.0 ml/min, major isomer *t<sub>R</sub>* = 20.6 min, minor isomer *t<sub>R</sub>* = 39.3 min) (95% *ee*).

**Ethyl (*R,E*)-5-(4-bromophenyl)-7-oxo-9-(triisopropylsilyl)non-2-en-8-ynoate**

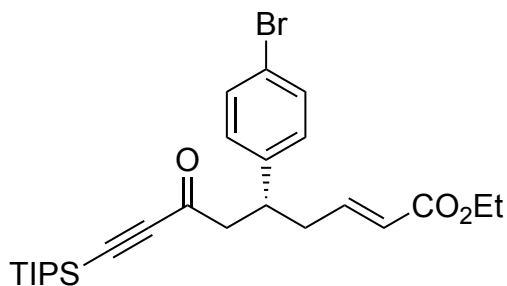

**Yield:** 81% (40.8 mg)

**Physical State:** Yellow oil

**<sup>1</sup>H NMR (CDCl<sub>3</sub>, 400 MHz)** δ 1.06-1.14 (m, 21H), 1.26 (t, *J* = 7.2 Hz, 3H), 2.50-2.59 (m, 2H), 2.87 (dd, *J* = 0.80, 8.0 Hz, 2H), 3.43 (quin, *J* = 7.2 Hz, 1H), 4.15 (t, *J* = 7.2 Hz, 2H), 5.76 (d, *J* = 15.6 Hz, 1H), 6.74 (td, *J* = 7.2, 15.6 Hz, 1H), 7.05 (d, *J* = 8.4 Hz, 2H), 7.42 (d, *J* = 8.4 Hz, 2H)

**<sup>13</sup>C NMR (CDCl<sub>3</sub>, 100 MHz)** δ 185.1, 166.1, 145.0, 141.2, 131.9, 131.9, 129.1, 129.1, 123.8, 120.8, 104.1, 96.8, 60.3, 51.3, 40.2, 38.4, 18.5, 18.5, 18.5, 18.5, 18.5, 18.5, 14.2, 11.0, 11.0, 11.0

**HRMS (ESI):** [M+Na]<sup>+</sup> calcd for C<sub>26</sub>H<sub>37</sub>BrO<sub>3</sub>SiNa: 527.1588, found: 527.1589

**IR(neat)**ν 2145, 1720, 1677, 1464, 1206, 1101, 882, 679 cm<sup>-1</sup>

[α]<sub>D</sub><sup>26</sup> +2.65 (*c* 1.0, CHCl<sub>3</sub>)

**R<sub>f</sub>**(*n*-Hexane: EtOAc = 3:1, color reagent: Hanessian's stain reagent): 0.45

The enantiomeric ratio was determined by HPLC using CHIRALPACK® IG (*n*-Hexane: *i*-PrOH = 66:1; flow rate 1.0 ml/min, major isomer *t<sub>R</sub>* = 12.7 min, minor isomer *t<sub>R</sub>* = 20.3 min) (94% *ee*).

**Ethyl (*R,E*)-5-(3-bromophenyl)-7-oxo-9-(triisopropylsilyl)non-2-en-8-ynoate**

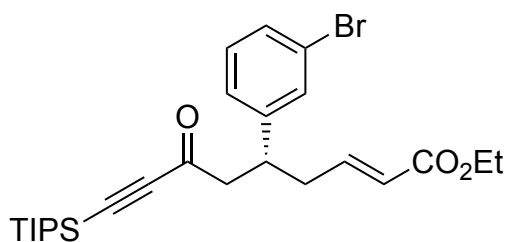

**Yield:** 78% (39.3 mg)

**Physical State:** Yellow oil

**<sup>1</sup>H NMR (CDCl<sub>3</sub>, 400 MHz)** δ 1.07-1.15 (m, 21H), 1.26 (t, *J* = 7.2 Hz, 3H), 2.46-2.59 (m, 2H), 2.87 (d, *J* = 7.2 Hz, 2H), 3.43 (quin, *J* = 7.2 Hz, 1H), 4.15 (q, *J* = 7.2 Hz, 2H), 5.78 (d, *J* = 15.6 Hz, 1H), 6.75 (td, *J* = 7.6, 15.6 Hz, 1H), 7.10 (d, *J* = 7.6 Hz, 1H), 7.17 (t, *J* = 8.0 Hz, 1H), 7.33-7.36 (m, 2H)

**<sup>13</sup>C NMR (CDCl<sub>3</sub>, 100 MHz)** δ 185.0, 166.1, 145.0, 144.7, 130.4, 130.3, 130.2, 126.2, 123.9, 122.8, 104.0, 96.9, 60.3, 51.2, 40.3, 38.4, 18.7, 18.7, 18.5, 18.5, 18.4, 18.4, 14.2, 11.0, 11.0, 11.0

**HRMS (ESI):** [M+Na]<sup>+</sup> calcd for C<sub>26</sub>H<sub>37</sub>BrO<sub>3</sub>SiNa: 527.1588, found: 527.1586

**IR(neat)**ν 2146, 1719, 1677, 1464, 1367, 1270, 1206, 1113, 882, 680 cm<sup>-1</sup>

[α]<sub>D</sub><sup>26</sup> -10.9 (*c* 0.65, CHCl<sub>3</sub>)

$R_f$ (*n*-Hexane: EtOAc =3:1, color reagent: Hanessian's stain reagent): 0.45

The enantiomeric ratio was determined by HPLC using CHIRALPACK® IG (*n*-Hexane: *i*-PrOH = 66:1; flow rate 1.0 ml/min, major isomer  $t_R$  = 11.4 min, minor isomer  $t_R$  = 20.4 min) (95% *ee*).

#### Ethyl (*R,E*)-5-(2-bromophenyl)-7-oxo-9-(triisopropylsilyl)non-2-en-8-ynoate

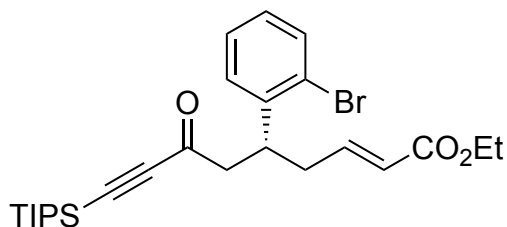

**Yield:** 70% (435.3 mg)

**Physical State:** Yellow oil

$^1\text{H NMR}$  ( $\text{CDCl}_3$ , 400 MHz)  $\delta$  1.05-1.17 (m, 21H), 1.26 (t,  $J$  = 7.2 Hz, 3H), 2.52-2.64 (m, 2H), 2.86 (dd,  $J$  = 8.0, 16.4 Hz, 1H), 2.92 (dd,  $J$  = 6.8, 16.0 Hz, 1H), 4.06 (quin,  $J$  = 7.2 Hz, 1H), 4.14 (q,  $J$  = 7.2 Hz, 2H), 5.78 (d,  $J$  = 15.6 Hz, 1H), 6.80 (td,  $J$  = 7.2, 15.6 Hz, 1H), 7.08 (dt,  $J$  = 1.6, 7.6 Hz, 1H), 7.17 (dd,  $J$  = 1.6, 7.6 Hz, 1H), 7.27 (t,  $J$  = 7.2 Hz, 1H), 7.55 (dd,  $J$  = 0.80, 8.0 Hz, 1H)

$^{13}\text{C NMR}$  ( $\text{CDCl}_3$ , 100 MHz)  $\delta$  185.1, 166.1, 145.0, 140.9, 133.4, 128.4, 127.8, 127.8, 124.8, 123.8, 103.9, 96.7, 60.2, 49.8, 39.0, 37.0, 18.5, 18.5, 18.5, 18.5, 18.5, 18.5, 14.2, 11.0, 11.0, 11.0

**HRMS (ESI):**  $[\text{M}+\text{Na}]^+$  calcd for  $\text{C}_{26}\text{H}_{37}\text{BrO}_3\text{SiNa}$ : 527.1588, found: 527.1588

**IR(neat)**  $\nu$  2146, 1721, 1676, 1470, 1367, 1267, 1205, 1162, 1107, 1024, 996 920, 883, 756, 680, 585, 452, 420  $\text{cm}^{-1}$

$[\alpha]_D^{26}$  -14.1 ( $c$  1.7,  $\text{CHCl}_3$ )

$R_f$ (*n*-Hexane: EtOAc =3:1, color reagent: Hanessian's stain reagent): 0.45

The enantiomeric ratio was determined by HPLC using CHIRALPACK® IG (*n*-Hexane: *i*-PrOH = 66:1; flow rate 1.0 ml/min, major isomer  $t_R$  = 9.05 min, minor isomer  $t_R$  = 9.91 min) (95% *ee*).

#### Ethyl (*R,E*)-5-(furan-2-yl)-7-oxo-9-(triisopropylsilyl)non-2-en-8-ynoate

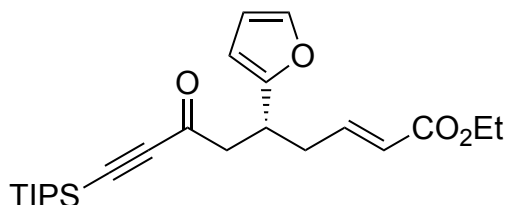

**Yield:** 65% (27.0 mg)

**Physical State:** Yellow oil

$^1\text{H NMR}$  ( $\text{CDCl}_3$ , 400 MHz)  $\delta$  1.04-1.17 (m, 21H), 1.27 (t,  $J$  = 7.2 Hz, 3H), 2.50-2.64 (m, 2H), 2.82 (dd,  $J$  = 6.8, 16.4 Hz, 1H), 2.94 (dd,  $J$  = 7.2, 16.4 Hz, 1H), 3.61 (quin,  $J$  = 6.8 Hz, 1H), 4.16 (q,  $J$  = 7.2 Hz, 2H), 5.81 (d,  $J$  = 15.6 Hz, 1H), 6.04 (d,  $J$  = 3.2 Hz, 1H), 6.26 (dd,  $J$  = 2.0, 3.2 Hz, 1H), 6.82 (td,  $J$  = 7.6, 15.6 Hz, 1H), 7.31 (d,  $J$  = 1.6 Hz, 1H)

<sup>13</sup>C NMR (CDCl<sub>3</sub>, 100 MHz) δ 185.0, 166.1, 155.2, 145.1, 141.6, 123.7, 110.1, 105.9, 103.9, 96.7, 60.3, 48.7, 36.0, 33.9, 18.5, 18.5, 18.5, 18.5, 18.5, 18.5, 14.2, 11.0, 11.0, 11.0

HRMS (ESI): [M+Na]<sup>+</sup> calcd for C<sub>24</sub>H<sub>36</sub>O<sub>4</sub>SiNa: 439.2275, found: 439.2272

IR(neat)ν 2146, 1720, 1681, 1464, 1367, 1267, 1161, 1110, 883, 733, 664 cm<sup>-1</sup>

[α]<sub>D</sub><sup>26</sup> +1.04 (c 0.75, CHCl<sub>3</sub>)

R<sub>f</sub>(*n*-Hexane: EtOAc = 3:1, color reagent: Hanessian's stain reagent): 0.20

The enantiomeric ratio was determined by HPLC using CHIRALPACK® IG (*n*-Hexane: *i*-PrOH = 66:1; flow rate 1.0 ml/min, major isomer t<sub>R</sub> = 11.9 min, minor isomer t<sub>R</sub> = 16.5 min) (94% *ee*).

#### Ethyl (*R,E*)-5-(dimethyl(phenyl)silyl)-7-oxo-9-(triisopropylsilyl)non-2-en-8-ynoate

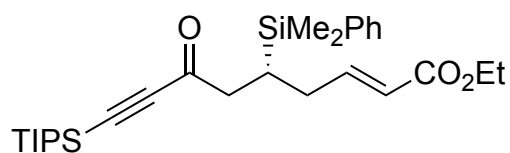

Yield: 85% (41.1 mg)

Physical State: Yellow oil

<sup>1</sup>H NMR (CDCl<sub>3</sub>, 400 MHz) δ 0.32 (s, 3H), 0.33 (s, 3H), 1.05-1.15 (m, 21H), 1.26 (t, *J* = 7.2 Hz, 3H), 1.79-1.86 (m, 1H), 2.14 (dq, *J* = 1.2, 8.0 Hz, 1H), 2.30-2.37 (m, 1H), 2.47 (dd, *J* = 8.4, 16.4 Hz, 1H), 2.57 (dd, *J* = 5.6, 16.8 Hz, 1H), 4.14 (q, *J* = 7.2 Hz, 2H), 5.72 (d, *J* = 15.6 Hz, 1H), 6.79 (td, *J* = 7.2, 15.6 Hz, 1H), 7.33-7.40 (m, 3H), 7.46-7.50 (m, 2H)

<sup>13</sup>C NMR (CDCl<sub>3</sub>, 100 MHz) δ 187.5, 166.1, 147.8, 136.7, 136.7, 133.9, 129.4, 128.0, 122.7, 122.7, 104.1, 96.1, 60.1, 45.7, 32.6, 21.1, 18.5, 18.5, 18.5, 18.5, 18.5, 18.5, 14.2, 11.0, 11.0, 11.0, -4.11, -4.11

HRMS (ESI): [M+Na]<sup>+</sup> calcd for C<sub>28</sub>H<sub>44</sub>O<sub>3</sub>Si<sub>2</sub>Na: 507.2721, found: 507.2723

IR(neat)ν 2145, 1720, 1676, 1464, 1428, 1367, 1261, 1186, 1112, 1044, 997, 883, 835, 775, 736, 701, 680, 472 cm<sup>-1</sup>

[α]<sub>D</sub><sup>26</sup> -6.45 (c 2.1, CHCl<sub>3</sub>)

R<sub>f</sub>(*n*-Hexane: EtOAc = 3:1, color reagent: Hanessian's stain reagent): 0.50

The enantiomeric ratio was determined by HPLC using CHIRALPACK® IG (*n*-Hexane: *i*-PrOH = 66:1; flow rate 1.0 ml/min, major isomer t<sub>R</sub> = 7.84 min, minor isomer t<sub>R</sub> = 9.32 min) (98% *ee*).

#### Ethyl (*R,E*)-5-methyl-7-oxo-9-(triisopropylsilyl)non-2-en-8-ynoate

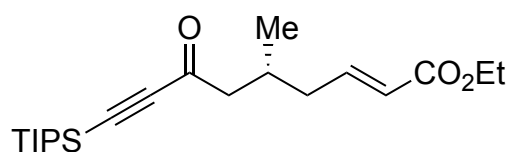

Yield: 60% (21.8 mg)

Physical State: Yellow oil

<sup>1</sup>H NMR (CDCl<sub>3</sub>, 400 MHz) δ 0.99 (d, *J* = 6.8 Hz, 3H), 1.08-1.16 (m, 21H), 1.29 (t, *J* = 7.2 Hz, 3H), 2.10-2.17 (m, 1H), 2.22-2.30 (m, 1H), 2.30-2.39 (m, 1H), 2.41 (dd, *J* = 7.6, 15.6 Hz, 1H), 2.57 (dd, *J* = 6.0, 15.6

Hz, 1H), 4.19 (q,  $J = 7.2$  Hz, 2H), 5.84 (dd,  $J = 1.2, 15.6$  Hz, 1H), 6.90 (td,  $J = 7.2, 15.6$  Hz, 1H)  
 $^{13}\text{C}$  NMR ( $\text{CDCl}_3$ , 100 MHz)  $\delta$  186.8, 166.3, 146.4, 123.4, 104.2, 96.0, 52.1, 38.9, 29.3, 19.6, 18.5, 18.5, 18.5, 18.5, 14.2, 10.9, 10.9, 10.9, 10.9

HRMS (ESI):  $[\text{M}+\text{Na}]^+$  calcd for  $\text{C}_{21}\text{H}_{36}\text{O}_3\text{SiNa}$ : 387.2326, found: 387.2325

IR(neat)  $\nu$  2146, 1727, 1677, 1462, 1070, 882, 682, 522, 483, 459, 431, 421, 413  $\text{cm}^{-1}$

$[\alpha]_{\text{D}}^{26} +10.8$  ( $c$  0.15,  $\text{CHCl}_3$ )

$R_f$ ( $n$ -Hexane: EtOAc = 3:1, color reagent: Hanessian's stain reagent): 0.60

The enantiomeric ratio was determined by HPLC using CHIRALPACK® IG ( $n$ -Hexane:  $i$ -PrOH = 66:1; flow rate 1.0 ml/min, major isomer  $t_R = 5.91$  min, minor isomer  $t_R = 6.39$  min) (76%  $ee$ ).

## 2.5. One-pot procedure of providing compound 10 from compound 1 and compound 2g

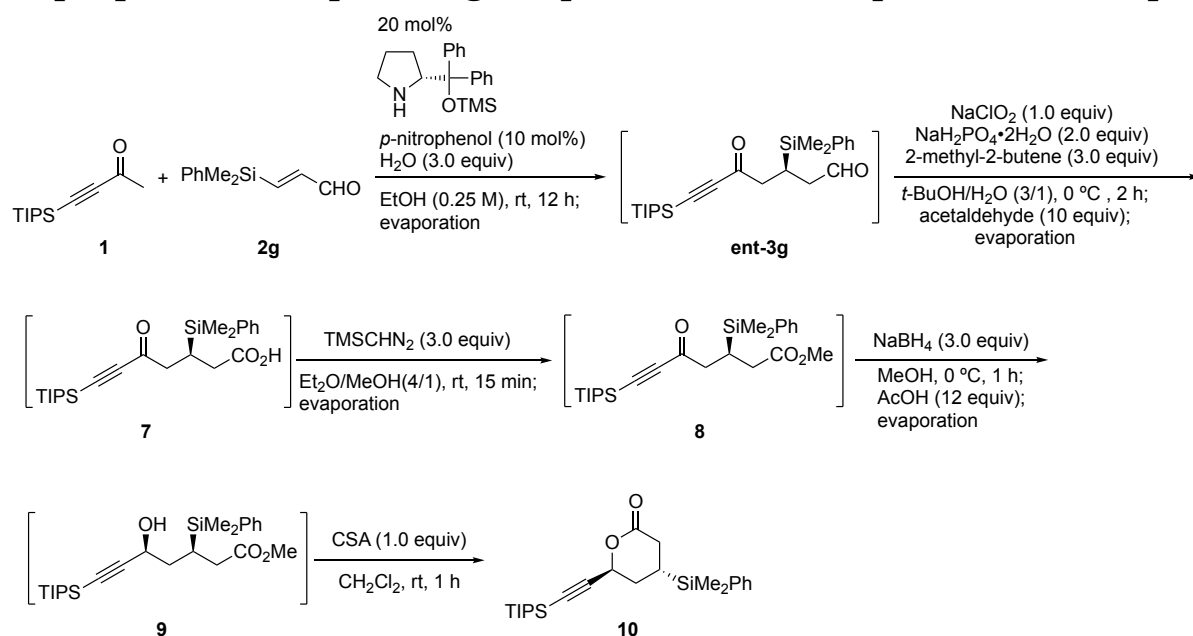

To a solution of aldehyde **2g** (114 mg, 0.60 mmol) and 4-(trisopropylsilyl)but-3-yn-2-one **1** (112 mg, 0.50 mmol) in EtOH (2.0 mL),  $\text{H}_2\text{O}$  (27  $\mu\text{L}$ , 1.5 mmol), diphenylprolinol silyl ether (32.5 mg, 0.10 mmol) and *p*-nitrophenol (7.0 mg, 0.050 mmol) were added at room temperature. After stirred at this temperature for 12 hours, its solvent was removed by evaporation under reduced pressure. To a solution of the residue in *t*-BuOH/ $\text{H}_2\text{O}$  = (3/1) (0.8 mL),  $\text{NaH}_2\text{PO}_4 \cdot \text{H}_2\text{O}$  (312 mg, 1.0 mmol), 2-methyl-2-butene (160  $\mu\text{L}$ , 1.5 mmol) and  $\text{NaClO}_2$  (45 mg, 0.5 mmol) were added at 0 °C. After stirred at this temperature for 2 hours, the oxidant in the reaction mixture was quenched by acetaldehyde (0.14 mL, 2.5 mmol). Its solvent and excess amount of acetaldehyde were removed by evaporation under reduced pressure. To a solution of the residue in  $\text{Et}_2\text{O}$ : MeOH = (4:1) (1.0 mL),  $\text{TMSCHN}_2$  (2.0 M in  $\text{Et}_2\text{O}$ , 75  $\mu\text{L}$ , 1.5 mmol) was added at room temperature. After stirred at this temperature for 15 minutes, its solvent was removed by evaporation under reduced pressure. To a solution of the residue in MeOH (1.0 mL), sodium borohydride (56.0 mg, 1.5 mmol) was added at 0 °C. After stirred at this temperature for 1 hour, the reductant was quenched by acetic acid (0.24 mL, 6.0 mmol). Its solvent and acetic acid were removed by evaporation under reduced pressure. To a solution of the residue



in CH<sub>2</sub>Cl<sub>2</sub> (1.5 mL), CSA (117 mg, 0.5 mmol) was added at room temperature. After stirred at this temperature for 1 hour, the reaction mixture was quenched by sat. aq. NaHCO<sub>3</sub> (5 mL) and diluted by EtOAc (5 mL). After separated, the aqueous layer was extracted with EtOAc (5 mL) for three times. The combined organic layers were washed by brine (10 mL), dried over on sodium sulfate, and evaporated under reduced pressure. The crude material was purified by column chromatography on silica gel (*n*-Hexane: EtOAc = 10:1) to give desired compound **10** (85.0 mg, 0.21 mmol) in 42% isolated yield.

**(4*R*,6*S*)-4-(Dimethyl(phenyl)silyl)-6-((triisopropylsilyl)ethynyl)tetrahydro-2H-pyran-2-one (10)**

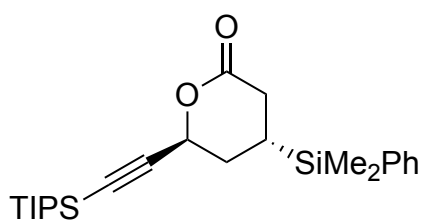

**Yield:** 42% (85.0 mg)

**Physical State:** Colorless oil

**<sup>1</sup>H NMR (CDCl<sub>3</sub>, 400 MHz)** δ 0.33 (s, 3H), 0.33 (s, 3H), 1.02-1.11 (m, 21H), 1.78-2.00 (m, 3H), 2.27 (dd, *J* = 12.0, 18.0 Hz, 1H), 2.62 (ddd, *J* = 1.6, 6.0, 18.0 Hz, 1H), 5.19 (dd, *J* = 3.2, 4.4 Hz, 1H), 7.35-7.42 (m, 3H), 7.45-7.48 (m, 2H)

**<sup>13</sup>C NMR (CDCl<sub>3</sub>, 100 MHz)** δ 170.1, 135.3, 133.8, 133.8, 129.7, 128.1, 128.1, 103.7, 89.1, 70.4, 30.7, 29.8, 18.5, 18.5, 18.5, 18.5, 18.5, 18.5, 15.6, 11.0, 11.0, 11.0, -5.65, -5.76

**HRMS (ESI):** [M+Na]<sup>+</sup> calcd for C<sub>24</sub>H<sub>38</sub>O<sub>2</sub>Si<sub>2</sub>Na: 437.2303, found: 437.2300

**IR(neat)**ν 2943, 2865, 2317, 1746, 1464, 1261, 1065, 977, 883, 814, 702, 668 cm<sup>-1</sup>

[α]<sub>D</sub><sup>26</sup> +43.9 (*c* 1.5, CHCl<sub>3</sub>)

**R<sub>f</sub>**(*n*-Hexane: EtOAc = 2:1, color reagent: Hanessian's stain reagent): 0.45

**2.6. One-pot procedure of providing compound 6 from compound 10**

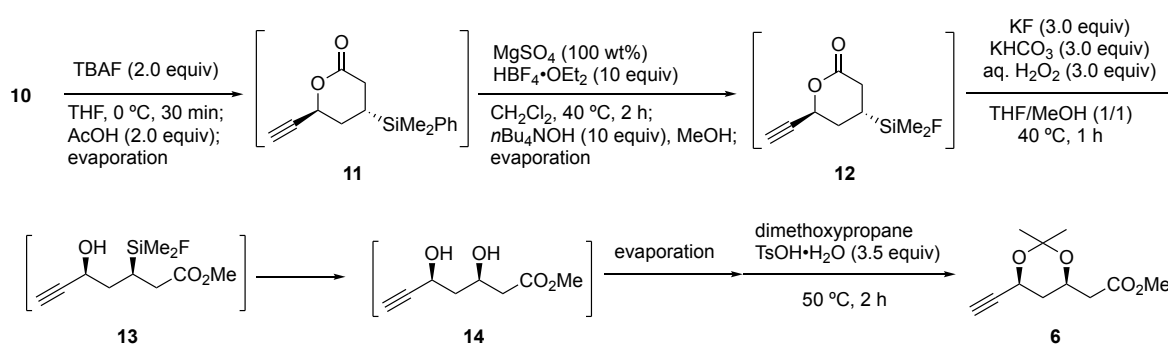

To a solution of compound **10** (82.8 mg, 0.20 mmol) in THF, TBAF (1.0 M in THF, 300 μL, 0.30 mmol) was added at 0 °C. After stirred at this temperature for 30 minutes, acetic acid (34.3 μL, 0.60 mmol) was added. Then solvent was removed by evaporation under reduced pressure. To a solution of the residue in

CH<sub>2</sub>Cl<sub>2</sub> (0.30 mL), MgSO<sub>4</sub> (82.8 mg) and HBF<sub>4</sub>·OEt<sub>2</sub> (272 μL, 2.0 mmol) were added at 40 °C. After stirred at this temperature for 2 hours, TBAOH (10% in MeOH, 5.2 mL, 2.0 mmol) was added. Then solvent was removed by evaporation under reduced pressure. To a solution of the residue in THF: MeOH = (1:1) (0.30 mL), KF (34.9 mg, 0.60 mmol), KHCO<sub>3</sub> (60.0 mg, 0.60 mmol) and aq. H<sub>2</sub>O<sub>2</sub> (35% in H<sub>2</sub>O, 40.2 μL, 0.60 mmol) were added at 40 °C. After stirred at this temperature for 2 hours, solvent was removed by evaporation under reduced pressure. To a solution of the residue in 2,2-dimethoxy propane (0.60 mL), TsOH·H<sub>2</sub>O (133 mg, 0.70 mmol) was added at 50 °C. After stirred at this temperature for 2 hours, the reaction mixture was quenched by sat. aq. NaHCO<sub>3</sub> (5 mL) and diluted by EtOAc (5 mL). The aqueous layer was extracted with EtOAc (5 mL) for three times. The combined organic layers were washed with brine (20 mL), dried over on sodium sulfate. Its solvent was removed by evaporation under reduced pressure. The residue was purified by column chromatography on silica gel (*n*-Hexane: EtOAc = 4:1) to give corresponding compound **6** (17.0 mg, 0.080 mmol) in 40% isolated yield.

### Methyl 2-((4*R*,6*S*)-6-ethynyl-2,2-dimethyl-1,3-dioxan-4-yl)acetate (**6**)

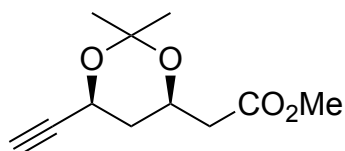

**Yield:** 40% (17.0 mg)

**Physical State:** Colorless oil

**<sup>1</sup>H NMR (CDCl<sub>3</sub>, 400 MHz)** δ 1.42 (s, 3H), 1.47 (s, 3H), 1.67 (t, *J* = 13.2 Hz, 1H), 1.85 (td, *J* = 2.4, 16.8 Hz, 1H), 2.40 (dd, *J* = 6.0, 16.0 Hz, 1H), 2.45 (d, *J* = 2.0 Hz, 1H), 2.56 (dd, *J* = 7.2, 16.0 Hz, 1H), 3.69 (s, 3H), 4.31 (dsext, *J* = 2.4, 6.4 Hz, 1H), 4.69 (td, *J* = 2.4, 11.6 Hz, 1H)

**<sup>13</sup>C NMR (CDCl<sub>3</sub>, 100 MHz)** δ 171.0, 99.6, 82.2, 72.9, 65.4, 60.0, 51.7, 40.8, 36.7, 30.0, 19.3

**HRMS (ESI):** [M+Na]<sup>+</sup> calcd for C<sub>11</sub>H<sub>16</sub>O<sub>4</sub>Na: 235.0941, found: 235.0940

**IR(neat)**ν 3276, 2926, 2126, 1728, 1462, 1381, 1262, 1200, 1166, 1123, 1011, 924, 845, 743, 665, 557 cm<sup>-1</sup>  
[α]<sub>D</sub><sup>26</sup> -1.97 (*c* 1.1, CHCl<sub>3</sub>)

**R<sub>f</sub>**(*n*-Hexane: EtOAc = 2:1, color reagent: Hanessian's stain reagent): 0.40

## 2.7. Lindlar reduction of compound **6** to determine its absolute configuration

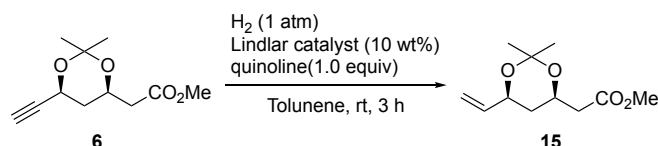

To a solution of compound **7** (12.7 mg, 0.060 mmol) in toluene (1.0 mL), Lindlar's catalyst (2.0 mg) and quinolone (7.11 μL, 0.060 mmol) were added at room temperature under H<sub>2</sub> atmosphere (1 atm). After stirred at this condition for 3 hours, the residue was filtrated by Celite<sup>®</sup>. The solvent was removed by evaporation under reduced pressure. The residue was purified by column chromatography on silica gel (*n*-Hexane: EtOAc

= 4:1) to give corresponding compound **15** (11.7 mg, 0.055 mmol) in 91% isolated yield. All Spectrum data of target compound were matched to reported data<sup>1</sup>). The reported value of optical rotation is  $[\alpha]_D^{20}$  -2.8 (*c* 1.4, CHCl<sub>3</sub>) and observed one was  $[\alpha]_D^{27}$  -2.9 (*c* 1.0 CHCl<sub>3</sub>). Thus, absolute configuration of compound **15** is same to reported one.

### Methyl 2-((4*R*,6*S*)-2,2-dimethyl-6-vinyl-1,3-dioxan-4-yl)acetate (**15**)

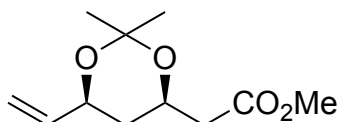

**Yield:** 91% (11.7 mg)

**Physical State:** Colorless oil

<sup>1</sup>H NMR (CDCl<sub>3</sub>, 400 MHz)  $\delta$  1.30 (q, *J* = 12.8, 1H), 1.41 (s, 3H), 1.49 (s, 3H), 1.66 (td, *J* = 2.4, 12.8 Hz, 1H), 2.40 (dd, *J* = 6.4, 15.6 Hz, 1H), 2.57 (dd, *J* = 6.8, 15.6 Hz, 1H), 3.69 (s, 3H), 4.32-4.41 (m, 2H), 5.13 (td, *J* = 1.6, 10.4 Hz, 1H), 5.26 (td, *J* = 1.2, 17.2 Hz, 1H), 5.81 (ddd, *J* = 6.0, 10.4, 17.2 Hz, 1H)

<sup>13</sup>C NMR (CDCl<sub>3</sub>, 100 MHz)  $\delta$  171.3, 138.4, 115.6, 98.9, 70.0, 65.6, 51.7, 41.1, 36.2, 30.0, 19.7

**HRMS (ESI):** [M+Na]<sup>+</sup> calcd for C<sub>11</sub>H<sub>18</sub>O<sub>4</sub> Na: 237.1097, found: 237.1097

**IR(neat)**  $\nu$  2994, 2951, 1740, 1438, 1381, 1314, 1259, 1200, 1169, 1097, 999, 925, 848 cm<sup>-1</sup>

$[\alpha]_D^{27}$  -2.9 (*c* 1.0, CHCl<sub>3</sub>)

**R<sub>f</sub>**(*n*-Hexane: EtOAc = 2:1, color reagent: Hanessian's stain reagent): 0.35

## 2.8. Preparation of compound **8**

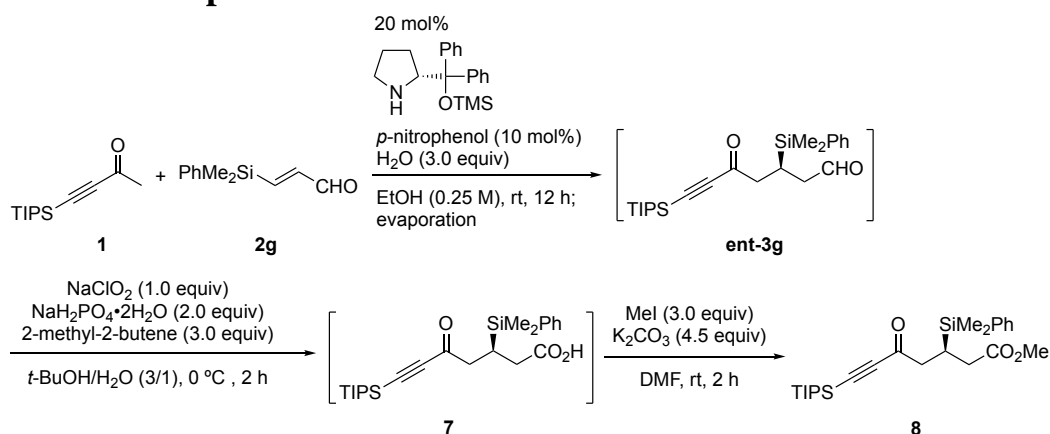

To a solution of aldehyde **2g** (1.33 g, 7.0 mmol) and 4-(triisopropylsilyl)but-3-yn-2-one **1** (1.57 g, 7.0 mmol) in EtOH (21 mL), H<sub>2</sub>O (378  $\mu$ L, 21 mmol), diphenylprolinol silyl ether (456 mg, 1.4 mmol) and *p*-nitrophenol (97.4 mg, 0.70 mmol) were added at room temperature. After stirred the reaction mixture at this temperature for 3 hours, its solvent was removed under reduced pressure. To a solution of the residue in *t*-BuOH: H<sub>2</sub>O = (3:1) (21 mL), NaH<sub>2</sub>PO<sub>4</sub>·H<sub>2</sub>O (2.18 g, 14 mmol), 2-methyl-2-butene (2.23 mL, 21 mmol) and NaClO<sub>2</sub> (633 mg, 7.0 mmol) were added at 0 °C. After stirred at this temperature for 2 hours, the reaction mixture was quenched by sat. aq. sodium hyposulfite (50 mL). The residue was diluted by EtOAc (20 mL). After separated,

the aqueous layer was extracted with EtOAc (30 mL) for three times. The combined organic layers were evaporated under reduced pressure. The residue was directly used without further purification. To a solution of crude material in DMF (30 mL), MeI (2.18 mL, 35 mmol) and K<sub>2</sub>CO<sub>3</sub> (7.26 g, 75 mmol) were added at room temperature. After stirred at this temperature for 2 hours, the reaction mixture was quenched by sat. aq. ammonium chloride (60 mL). The residue was diluted by EtOAc (30 mL). After separated, the aqueous layer was extracted with EtOAc (50 mL) for three times. The combined organic layers were washed by brine, dried over on sodium sulfate, and evaporated under reduced pressure. The crude material was purified by column chromatography on silica gel (*n*-Hexane: EtOAc = 15:1) to give the target compound **8** (1.71 g, 3.85 mmol) in 55% yield.

### Methyl (*R*)-3-(dimethyl(phenyl)silyl)-5-oxo-7-(triisopropylsilyl)hept-6-ynoate (**8**)

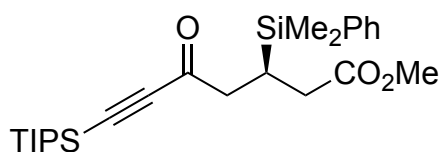

**Yield:** 55% (1.71 g)

**Physical State:** Brown oil

**<sup>1</sup>H NMR (CDCl<sub>3</sub>, 400 MHz)** δ 0.33 (s, 6H), 1.07-1.15 (m, 21H), 2.05-2.12 (m, 1H), 2.26 (dd, *J* = 8.0, 15.6 Hz, 1H), 2.41 (dd, *J* = 6.0, 15.6 Hz, 1H), 2.55 (dd, *J* = 8.8, 16.8 Hz, 1H), 2.66 (dd, *J* = 8.8, 16.8 Hz, 1H) 3.56 (s, 3H), 7.33-7.39 (m, 3H), 7.48-7.50 (m, 2H)

**<sup>13</sup>C NMR (CDCl<sub>3</sub>, 100 MHz)** δ 187.2, 173.3, 136.4, 133.9, 133.9, 129.4, 127.9, 127.9, 104.0, 95.7, 51.4, 46.0, 34.4, 32.8, 18.5, 18.5, 18.5, 18.5, 18.5, 18.5, 11.0, 11.0, 11.0, -4.48, -4.52

**HRMS (ESI):** [M+Na]<sup>+</sup> calcd for C<sub>25</sub>H<sub>40</sub>O<sub>3</sub>Si<sub>2</sub>Na: 467.2408, found: 467.2411

**IR(neat)**ν 2946, 2867, 2146, 1721, 1676, 1464, 1428, 1367, 1261, 1185, 1112, 1044, 997, 883, 835, 815, 775, 736, 701, 680, 581 cm<sup>-1</sup>

[α]<sub>D</sub><sup>26</sup> +14.3 (*c* 0.90, CHCl<sub>3</sub>)

**R<sub>f</sub>**(*n*-Hexane: EtOAc = 3:1, color reagent: Hanessian's stain reagent): 0.55

## 2.9. Stereo-selective reduction of compound **8**

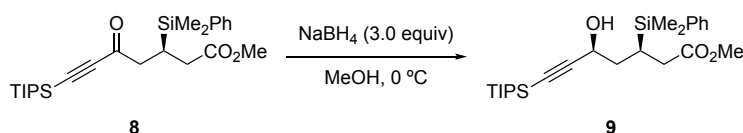

To a solution of compound **8** (44.5 mg, 0.10 mmol) in MeOH (300 μL), sodium borohydride (11.3 mg, 0.30 mmol) was added at 0 °C. After stirred at this temperature for 1 hour, the reaction mixture was quenched by sat. aq. ammonium chloride (5 mL). The residue was diluted by EtOAc (5 mL). After separated, the aqueous layer was extracted with EtOAc (5 mL) for three times. The combined organic layers were washed by brine (20 mL) and dried over on sodium sulfate. The solvent was removed by evaporation under reduced pressure.

The residue was purified by column chromatography on silica gel (*n*-Hexane: EtOAc = 8:1) to give the target compound **9** (39.2 mg, 0.088 mmol) in 88% yield.

**Methyl (3*R*,5*S*)-3-(dimethyl(phenyl)silyl)-5-hydroxy-7-(triisopropylsilyl)hept-6-ynoate (**9**)**

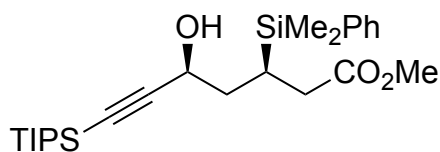

**Yield:** 88% (39.2 mg)

**Physical State:** Brown oil

**<sup>1</sup>H NMR (CDCl<sub>3</sub>, 400 MHz)** δ 0.321 (s, 6H), 1.03-1.14 (m, 21H), 1.60-1.66 (m, 1H), 1.70-1.81 (m, 1H), 1.87-1.95 (m, 1H), 2.39 (dd, *J* = 8.0, 16.4 Hz, 1H), 2.46 (dd, *J* = 8.0, 16.4 Hz, 1H), 3.60 (d, *J* = 0.80 Hz, 3H), 4.31 (dd, *J* = 4.0, 8.8 Hz, 1H), 7.34-7.36 (m, 3H), 7.48-7.50 (m, 2H)

**<sup>13</sup>C NMR (CDCl<sub>3</sub>, 100 MHz)** δ 175.5, 137.0, 133.9, 133.9, 129.3, 127.9, 127.9, 108.6, 85.4, 61.2, 51.9, 39.1, 34.2, 18.6, 18.6, 18.6, 18.6, 18.6, 18.6, 11.1, 11.1, 11.1, -4.32, -4.87

**HRMS (ESI):** [M+Na]<sup>+</sup> calcd for C<sub>25</sub>H<sub>42</sub>O<sub>3</sub>Si<sub>2</sub>Na: 469.2565, found: 469.2564

**IR(neat)**ν 2944, 2866, 2169, 1739, 1463, 1252, 1113, 1017, 883, 834, 816, 774, 735, 701, 678 cm<sup>-1</sup>

[α]<sub>D</sub><sup>26</sup> -3.04 (*c* 2.5, CHCl<sub>3</sub>)

**R<sub>f</sub>**(*n*-Hexane: EtOAc = 2:1, color reagent: Hanessian's stain reagent): 0.45

## 2.10. Deprotection of compound **9**

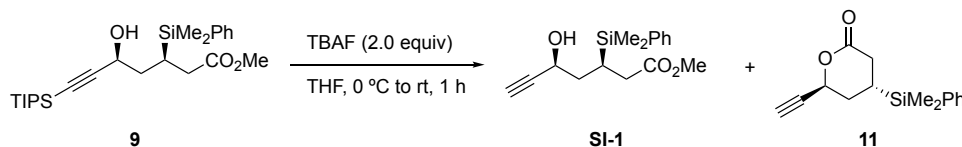

To a solution of compound **9** (133 mg, 0.30 mmol) in THF (0.90 mL), TBAF (1.0 M in THF, 0.60 mL, 0.60 mmol) was added at 0 °C with stirring. Then, the reaction temperature was elevated to room temperature. After stirred at this temperature for 1 hour, the reaction mixture was quenched by sat. aq. ammonium chloride (20 mL). The residue was diluted by EtOAc (10 mL). After separated, aqueous layer was extracted with EtOAc (10 mL) for three times. The combined organic layers were dried over on sodium sulfate and evaporated under reduced pressure. The residue was purified by column chromatography on silica gel (*n*-Hexane/EtOAc = 1/6~1/2) to give desired alcohol **SI-1** (23.5 mg, 27%) and undesired lactone **11** (47.2 mg, 61%).

**Methyl (3*R*,5*S*)-3-(dimethyl(phenyl)silyl)-5-hydroxyhept-6-ynoate (**SI-1**)**

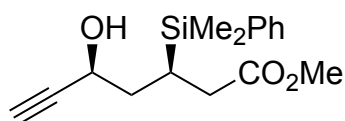

**Yield:** 27% (23.5 mg)

**Physical State:** Colorless oil

<sup>1</sup>H NMR (CDCl<sub>3</sub>, 400 MHz) δ 0.322 (s, 6H), 1.57-1.64 (m, 1H), 1.67-1.73 (m, 1H), 1.94 (ddd, *J* = 2.8, 9.6, 12.8 Hz, 1H), 2.22 (dd, *J* = 8.4, 16.8 Hz, 1H), 2.42-2.43 (m, 1H), 2.47 (dd, *J* = 3.6, 17.2 Hz, 1H), 3.63 (s, 3H), 4.27 (d, *J* = 9.6 Hz, 1H), 7.35-7.37 (m, 3H), 7.49-7.51 (m, 2H)

<sup>13</sup>C NMR (CDCl<sub>3</sub>, 100 MHz) δ 175.9, 136.7, 133.9, 133.9, 129.3, 127.9, 127.9, 84.8, 72.7, 60.3, 52.0, 38.9, 34.0, 16.8, -4.47, -4.92

HRMS (ESI): [M+Na]<sup>+</sup> calcd for C<sub>16</sub>H<sub>22</sub>O<sub>3</sub>SiNa: 313.1230, found: 313.1235

IR(neat)ν 3448, 3291, 3070, 2952, 2116, 1733, 1428, 1253, 1113, 1043, 816, 775, 736, 702 cm<sup>-1</sup>

[α]<sub>D</sub><sup>26</sup> -18.2 (*c* 0.50, CHCl<sub>3</sub>)

R<sub>f</sub>(*n*-Hexane: EtOAc = 2:1, color reagent: Hanessian's stain reagent): 0.25

#### (4*R*,6*S*)-4-(Dimethyl(phenyl)silyl)-6-ethynyltetrahydro-2H-pyran-2-one (11)

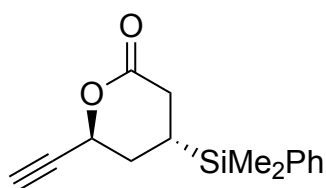

Yield: 61% (47.2 mg)

Physical State: Yellow oil

<sup>1</sup>H NMR (CDCl<sub>3</sub>, 400 MHz) 0.343 (s, 3H), 0.347 (s, 3H), 1.83-1.96 (m, 3H), 2.24-2.36 (s, 1H), 2.58 (dd, *J* = 2.0, 10.0 Hz, 1H), 2.64 (dd, *J* = 4.2, 16.4 Hz, 1H), 5.14 (quin, *J* = 2.0 Hz, 1H), 7.36-7.42 (m, 2H), 7.46-7.50 (m, 3H)

<sup>13</sup>C NMR (CDCl<sub>3</sub>, 100 MHz) δ 170.0, 135.2, 133.8, 133.8, 129.8, 128.1, 128.1, 80.2, 75.6, 69.4, 30.6, 29.2, 15.3, -5.60, -5.69

HRMS (ESI): [M+Na]<sup>+</sup> calcd for C<sub>15</sub>H<sub>18</sub>O<sub>2</sub>SiNa: 281.0968, found: 281.0964

IR(neat)ν 3265, 2954, 2092, 1735, 1683, 1428, 1253, 1113, 816, 776, 737, 702 cm<sup>-1</sup>

[α]<sub>D</sub><sup>26</sup> +53.9 (*c* 1.0, CHCl<sub>3</sub>)

R<sub>f</sub>(*n*-Hexane: EtOAc = 2:1, color reagent: Hanessian's stain reagent): 0.30

### 2.11. Oxidation of compound SI-1

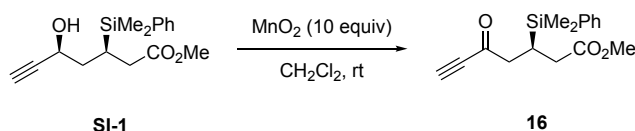

To a solution of alcohol **SI-1** (20 mg, 0.076 mmol) in CH<sub>2</sub>Cl<sub>2</sub> (1.0 mL), Mn<sub>2</sub>O (65.4 mg, 0.76 mmol) was added at room temperature. After stirred at this temperature for 1 hour, its solvent was removed under reduced pressure. The residue was diluted by EtOAc and filtrated by silica gel. After removed its solvent under reduced pressure, the reaction mixture was purified by column chromatography on silica gel (*n*-Hexane: EtOAc = 3:1) to give desired ketone **16** (16.9 mg, 0.058 mmol) in 76%.

## Methyl (*R*)-3-(dimethyl(phenyl)silyl)-5-oxohept-6-ynoate (**16**)

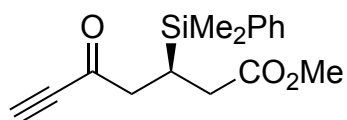

**Yield:** 76% (16.9 mg)

**Physical State:** Colorless oil

**<sup>1</sup>H NMR (CDCl<sub>3</sub>, 400 MHz)** δ 0.326 (s, 6H), 2.02-2.09 (m, 1H), 2.22 (dd, *J* = 8.8, 15.6 Hz, 1H), 2.41 (dd, *J* = 5.6, 15.6 Hz, 1H), 2.58-2.70 (m, 2H), 3.20 (s, 1H), 3.57 (s, 3H), 7.35-7.40 (m, 3H), 7.48-7.51 (m, 2H)

**<sup>13</sup>C NMR (CDCl<sub>3</sub>, 100 MHz)** δ 186.8, 173.5, 136.2, 133.9, 133.9, 129.5, 128.0, 128.0, 81.3, 78.6, 51.6, 45.8, 34.2, 17.6, -4.56, -4.61

**HRMS (ESI):** [M+Na]<sup>+</sup> calcd for C<sub>16</sub>H<sub>20</sub>O<sub>3</sub>SiNa: 311.1074, found: 311.1079

**IR(neat)**ν 3281, 2925, 2359, 1719, 1439, 1263, 1015, 763 cm<sup>-1</sup>

[α]<sub>D</sub><sup>26</sup> -8.80 (*c* 0.050, CHCl<sub>3</sub>)

**R<sub>f</sub>**(*n*-Hexane: EtOAc = 2:1, color reagent: Hanessian's stain reagent): 0.60

## 2.12. Reduction & intramolecular lactonization of compound **16**

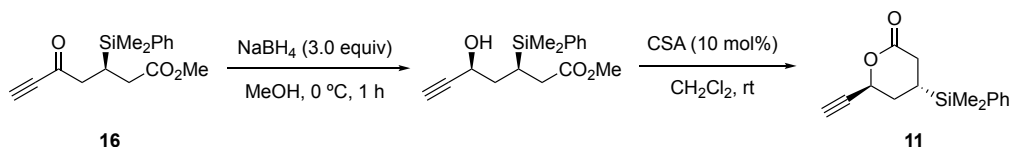

To a solution of compound **16** (14.4 mg, 0.050 mmol) in MeOH (150 μL), sodium borohydride (5.68 mg, 0.15 mmol) was added at 0 °C. After stirred at this temperature for 1 hour, the reaction mixture was quenched by sat. aq. ammonium chloride (0.5 mL). The residue was diluted by EtOAc (0.5 mL). After separated, the aqueous layer was extracted with EtOAc (1 mL) for three times. The combined organic layers were washed by brine (3 mL) and dried over sodium sulfate. The solvent was removed by evaporation under reduced pressure. It was difficult to determine the value of diastereo ratio because the both of peaks were overlap in <sup>1</sup>H-NMR spectrum. To distinguished its peaks, alcohol was converted to lactone. To a solution of the residue in CH<sub>2</sub>Cl<sub>2</sub> (0.5 mL), CSA (2.32 mg, 0.0020 mmol) was added at room temperature. After stirred at this temperature for 1 hour, the residue was directly purified by column chromatography (*n*-Hexane: EtOAc = 5:1) to give diastereomixtures of compound **11** (9.8 mg, 0.038 mmol) with *syn*: *anti* = 3:1. *Syn*: *anti* ratio means that the diastereo ratio of the compound **11**.

## 2.13. A side-reaction in asymmetric Michael reaction

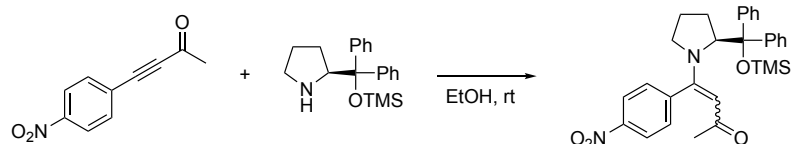

To a solution of 4-(4-nitrophenyl)but-3-yn-2-one (18.9 mg, 0.10 mmol) in EtOH (100  $\mu$ L), (*S*)-2-(diphenyl((trimethylsilyl)oxy)methyl)pyrrolidine (32.5 mg, 0.10 mmol) was added at room temperature. After stirred at this temperature for 1 hour, the reaction mixture was concentrated under reduced pressure. The residue was directly purified by column chromatography on silica gel (*n*-Hexane: EtOAc = 3:1 with 1% Et<sub>3</sub>N) to give adduct (38.5 mg, 0.075 mmol) in 75%.

**(*S*)-4-(2-(Diphenyl((trimethylsilyl)oxy)methyl)pyrrolidin-1-yl)-4-(4-nitrophenyl)but-3-en-2-one**

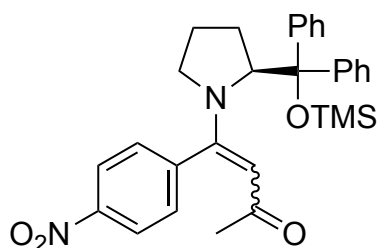

E/Z mixtures

**Yield:** 75% (38.5 mg)

**Physical State:** Yellow oil

**<sup>1</sup>H NMR (CDCl<sub>3</sub>, 400 MHz)**  $\delta$  -0.15 (s, 9H), 0.83-0.93 (m, 1H), 1.21-1.28 (m, 1H), 1.85 (s, 3H), 1.93-2.04 (m, 2H) 2.15-2.22 (m, 1H), 3.47 (ddd, *J* = 5.6, 9.6, 11.2 Hz, 1H), 4.80 (dd, *J* = 7.2, 9.2 Hz, 1H), 5.40 (brs, 1H), 7.29-7.43 (m, 10 H), 8.00-8.19 (m, 4H)

**<sup>13</sup>C NMR (CDCl<sub>3</sub>, 100 MHz)**  $\delta$  193.9, 163.0, 158.8, 158.8, 147.3, 147.3, 142.3, 142.1, 141.4, 129.3, 129.3, 129.3, 129.3, 128.1, 128.1, 127.8, 127.8, 127.7, 127.7, 127.5, 127.5, 83.2, 66.1 44.0, 30.8, 27.3, 22.1, 2.09, 2.09, 2.09

**HRMS (ESI):** [M+Na]<sup>+</sup> calcd for C<sub>30</sub>H<sub>34</sub>N<sub>2</sub>O<sub>4</sub>SiNa: 537.2180, found: 537.2180

**IR(neat)**  $\nu$  2956, 1661, 1601, 1523, 1493, 1345, 1252, 1182, 1069, 969, 840, 755, 704 cm<sup>-1</sup>

**R<sub>f</sub>** (*n*-Hexane: EtOAc = 1:2, color reagent: Hanessian's stain reagent): 0.10

## 2.14. Compounds information about side-product

**(4*E*,6*Z*)-7-Phenyl-1-(triisopropylsilyl)hepta-4,6-dien-1-yn-3-one (4)**

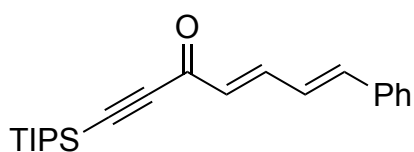

E/Z mixtures. (The presented structure is major isomer determined by coupling constant.)

**Physical State:** Brawn oil

**<sup>1</sup>H NMR (CDCl<sub>3</sub>, 400 MHz)**  $\delta$  0.96-1.04 (m, 21H), 6.35 (d, *J* = 15.2 Hz, 1H), 6.96-6.97 (m, 2H) 7.32-7.44



(m, 3H), 7.49-7.52 (m, 2H), 7.67 (ddd,  $J = 3.6, 6.8, 15.6$  Hz, 1H)

$^{13}\text{C}$  NMR ( $\text{CDCl}_3$ , 100 MHz)  $\delta$  177.8, 148.4, 142.7, 135.7, 131.9, 129.6, 128.9, 128.9, 127.5, 127.5, 126.4, 102.9, 95.7, 18.6, 18.6, 18.6, 18.6, 18.6, 18.6, 11.1, 11.1, 11.1

HRMS (ESI):  $[\text{M}+\text{Na}]^+$  calcd for  $\text{C}_{22}\text{H}_{30}\text{OSiNa}$ : 361.1958, found: 361.1959

IR(neat) $\nu$  2946, 2866, 2151, 1615, 1462, 1231, 1105, 997, 881, 754, 679  $\text{cm}^{-1}$

$R_f$ (*n*-Hexane: EtOAc = 3:1, color reagent: Hanessian's stain reagent): 0.85

**(1'*R*,2'*S*,3'*R*)-2'-(3-(Triisopropylsilyl)propioloyl)-1',2',3',6'-tetrahydro-[1,1':3',1''-terphenyl]-4'-carbaldehyde (5)**

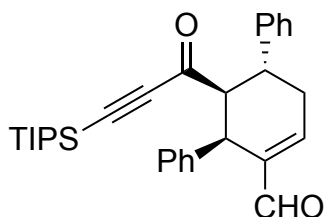

Diastereomeric mixtures. (The presented structure is major isomer determined by coupling constant.)

**Physical State:** Brown oil

$^1\text{H}$  NMR ( $\text{CDCl}_3$ , 400 MHz)  $\delta$  0.96-1.04 (m, 21H), 2.46 (tdd,  $J = 2.4, 10.4, 21.2$  Hz, 1H), 3.01 (td,  $J = 5.6, 21.2$  Hz, 1H), 3.46 (dd,  $J = 4.8, 12.4$  Hz, 1H), 3.52 (ddd,  $J = 5.4, 10.8, 12.4$  Hz, 1H), 4.58 (d,  $J = 4.8$  Hz, 1H), 7.08 (t,  $J = 1.2$  Hz, 1H), 7.14-7.33 (m, 10 H), 9.47 (s, 1H)

$^{13}\text{C}$  NMR ( $\text{CDCl}_3$ , 100 MHz)  $\delta$  204.8, 191.6, 149.2, 143.4, 141.8, 137.4, 129.3, 129.3, 128.7, 128.7, 128.4, 128.4, 127.3, 127.3, 126.7, 126.7, 104.2, 97.5, 56.8, 41.3, 36.7, 36.0, 18.5, 18.5, 18.5, 18.4, 18.4, 18.4, 10.9, 10.9, 10.9

HRMS (ESI):  $[\text{M}+\text{Na}]^+$  calcd for  $\text{C}_{31}\text{H}_{38}\text{O}_2\text{SiNa}$ : 493.2533, found: 493.2538

IR(neat) $\nu$  3428, 3030, 2945, 2866, 2146, 1726, 1685, 1494, 1460, 1374, 1204, 1148, 1074, 997, 957, 882, 758, 701, 583  $\text{cm}^{-1}$

$R_f$ (*n*-Hexane: EtOAc = 3:1, color reagent: Hanessian's stain reagent): 0.20

### 3. References

[1] Y. Gu, B. B. Snider, *Org. Lett.* **2003**, *5*, 4385.

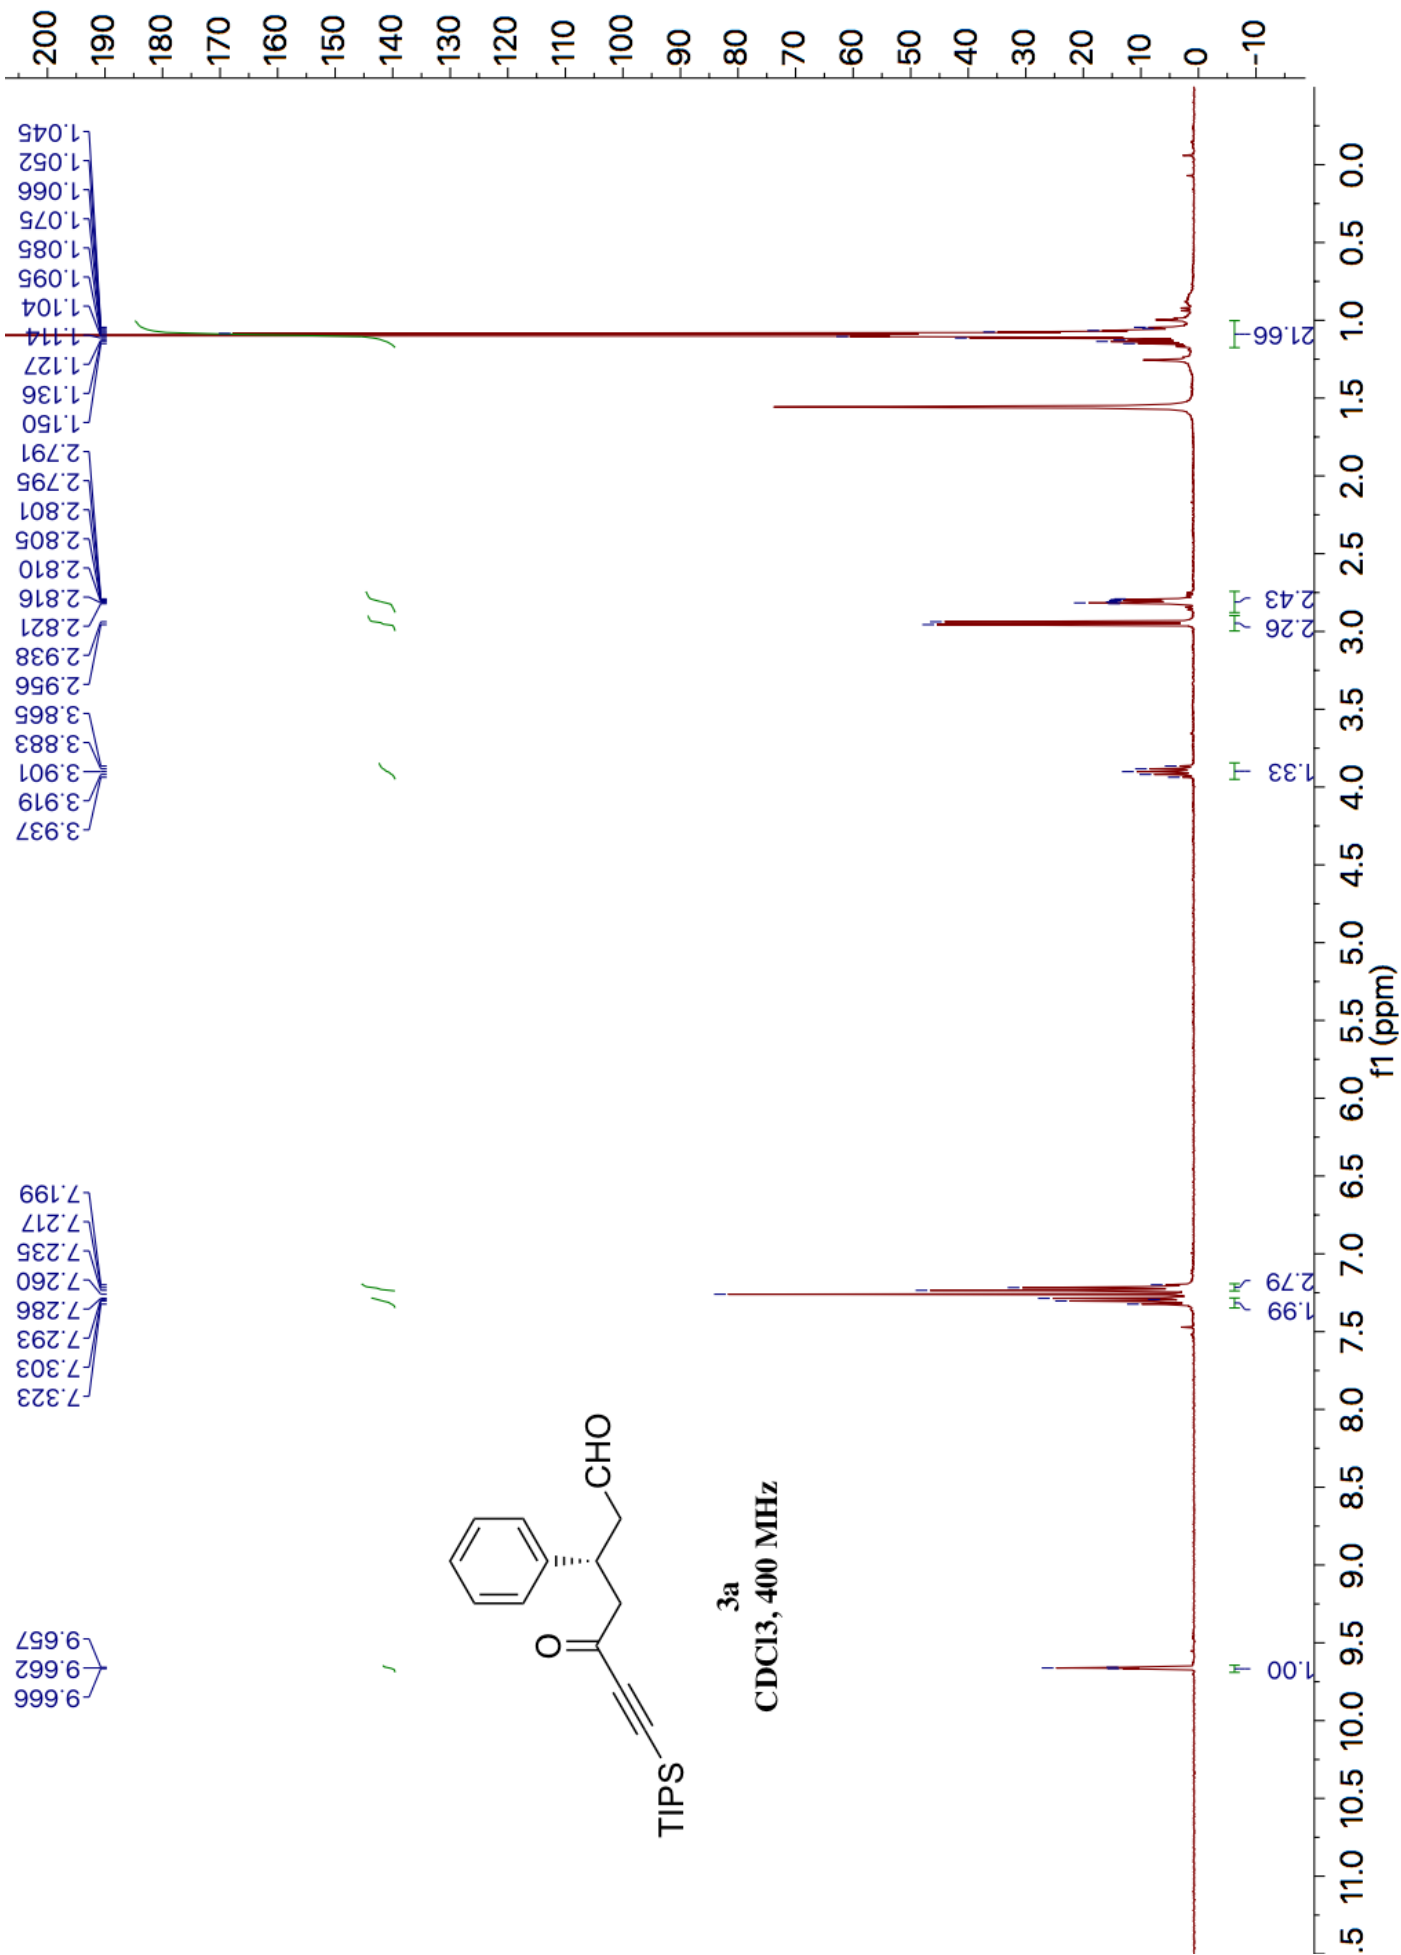

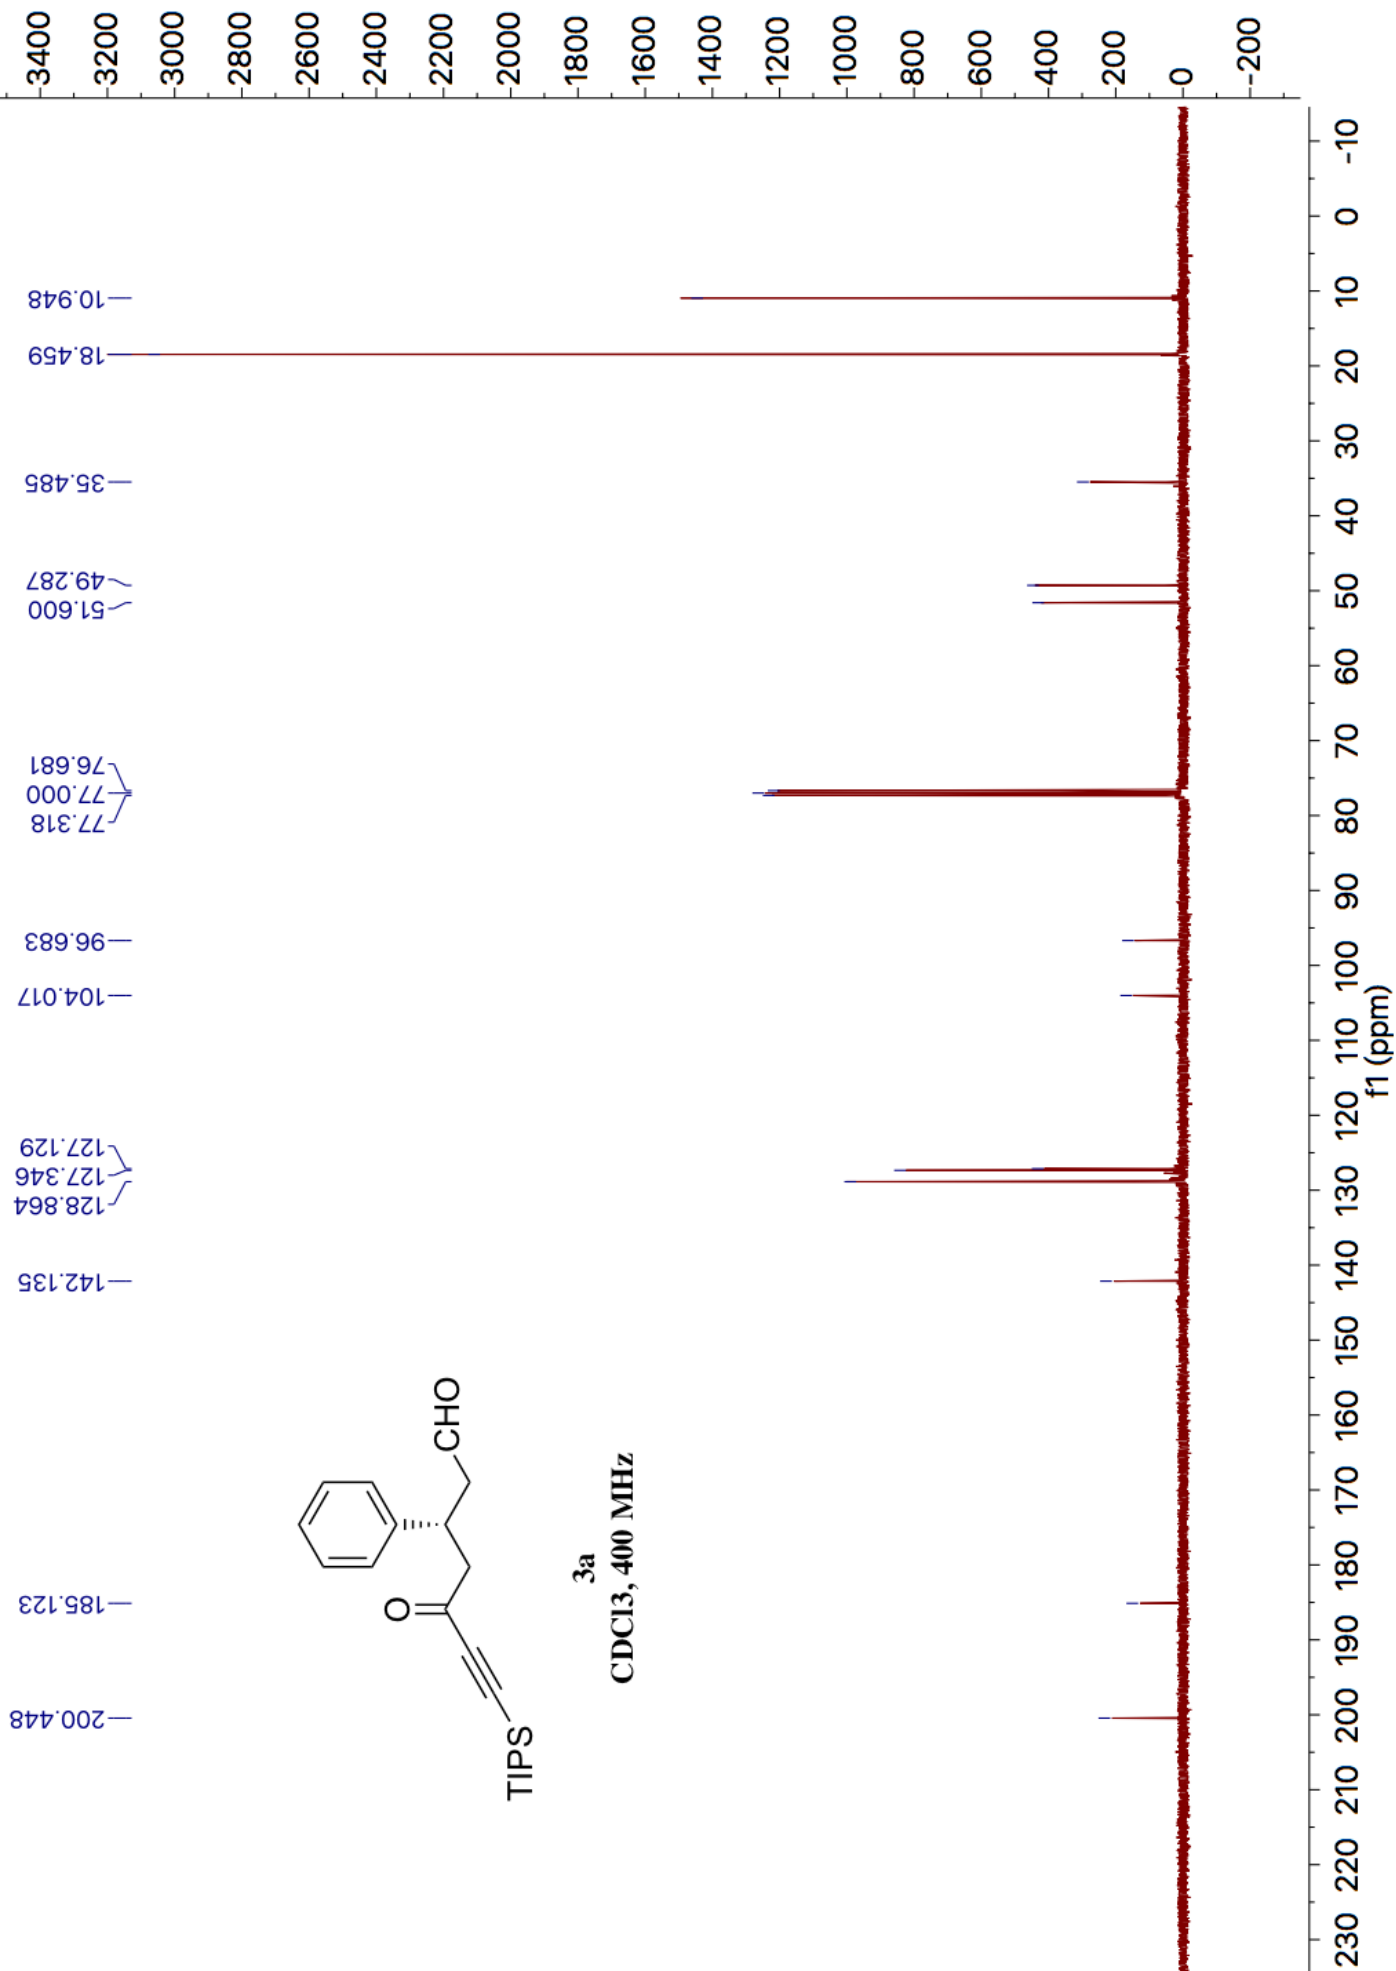

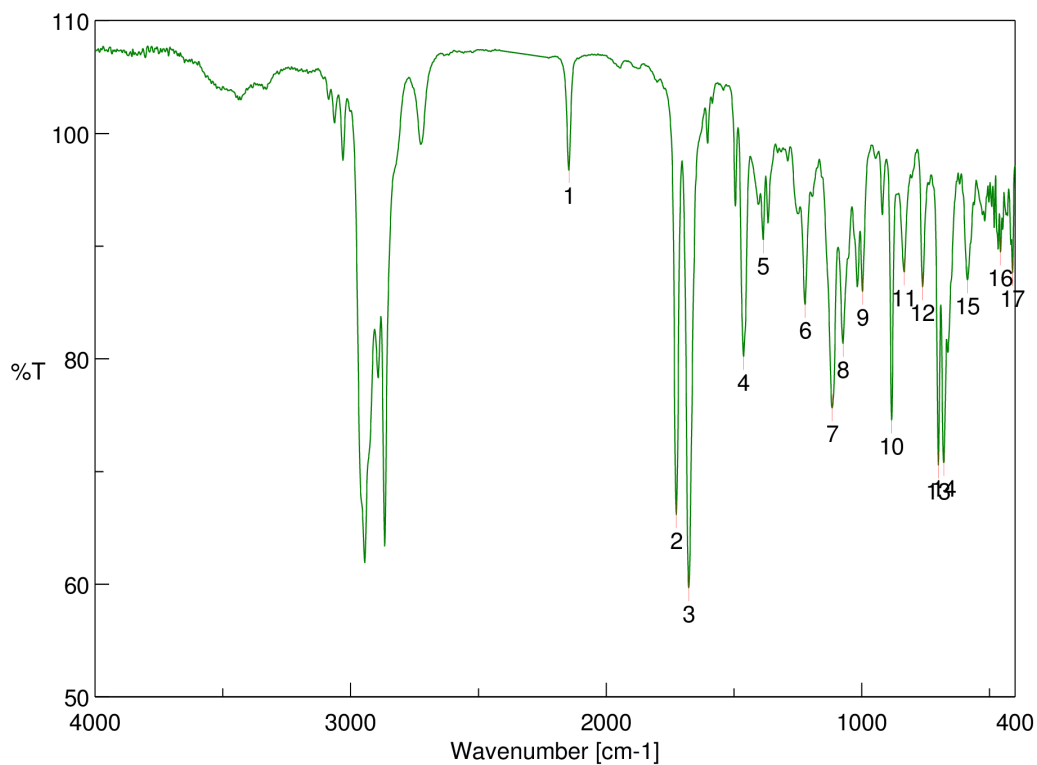

[ ピーク検出結果 ]

| No. | 位置      | 強度      | No. | 位置      | 強度      |
|-----|---------|---------|-----|---------|---------|
| 1   | 2145.42 | 96.7798 | 2   | 1725.98 | 66.1811 |
| 3   | 1676.8  | 59.6778 | 4   | 1462.74 | 80.2008 |
| 5   | 1385.6  | 90.5405 | 6   | 1221.68 | 84.8352 |
| 7   | 1115.62 | 75.6454 | 8   | 1073.19 | 81.371  |
| 9   | 997.017 | 85.9852 | 10  | 883.238 | 74.5744 |
| 11  | 834.062 | 87.7047 | 12  | 761.744 | 86.3906 |
| 13  | 700.034 | 70.576  | 14  | 678.82  | 70.8001 |
| 15  | 586.254 | 87.0057 | 16  | 457.047 | 89.4714 |
| 17  | 409.799 | 87.6601 |     |         |         |

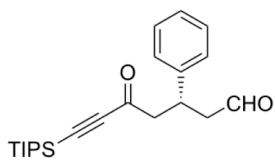

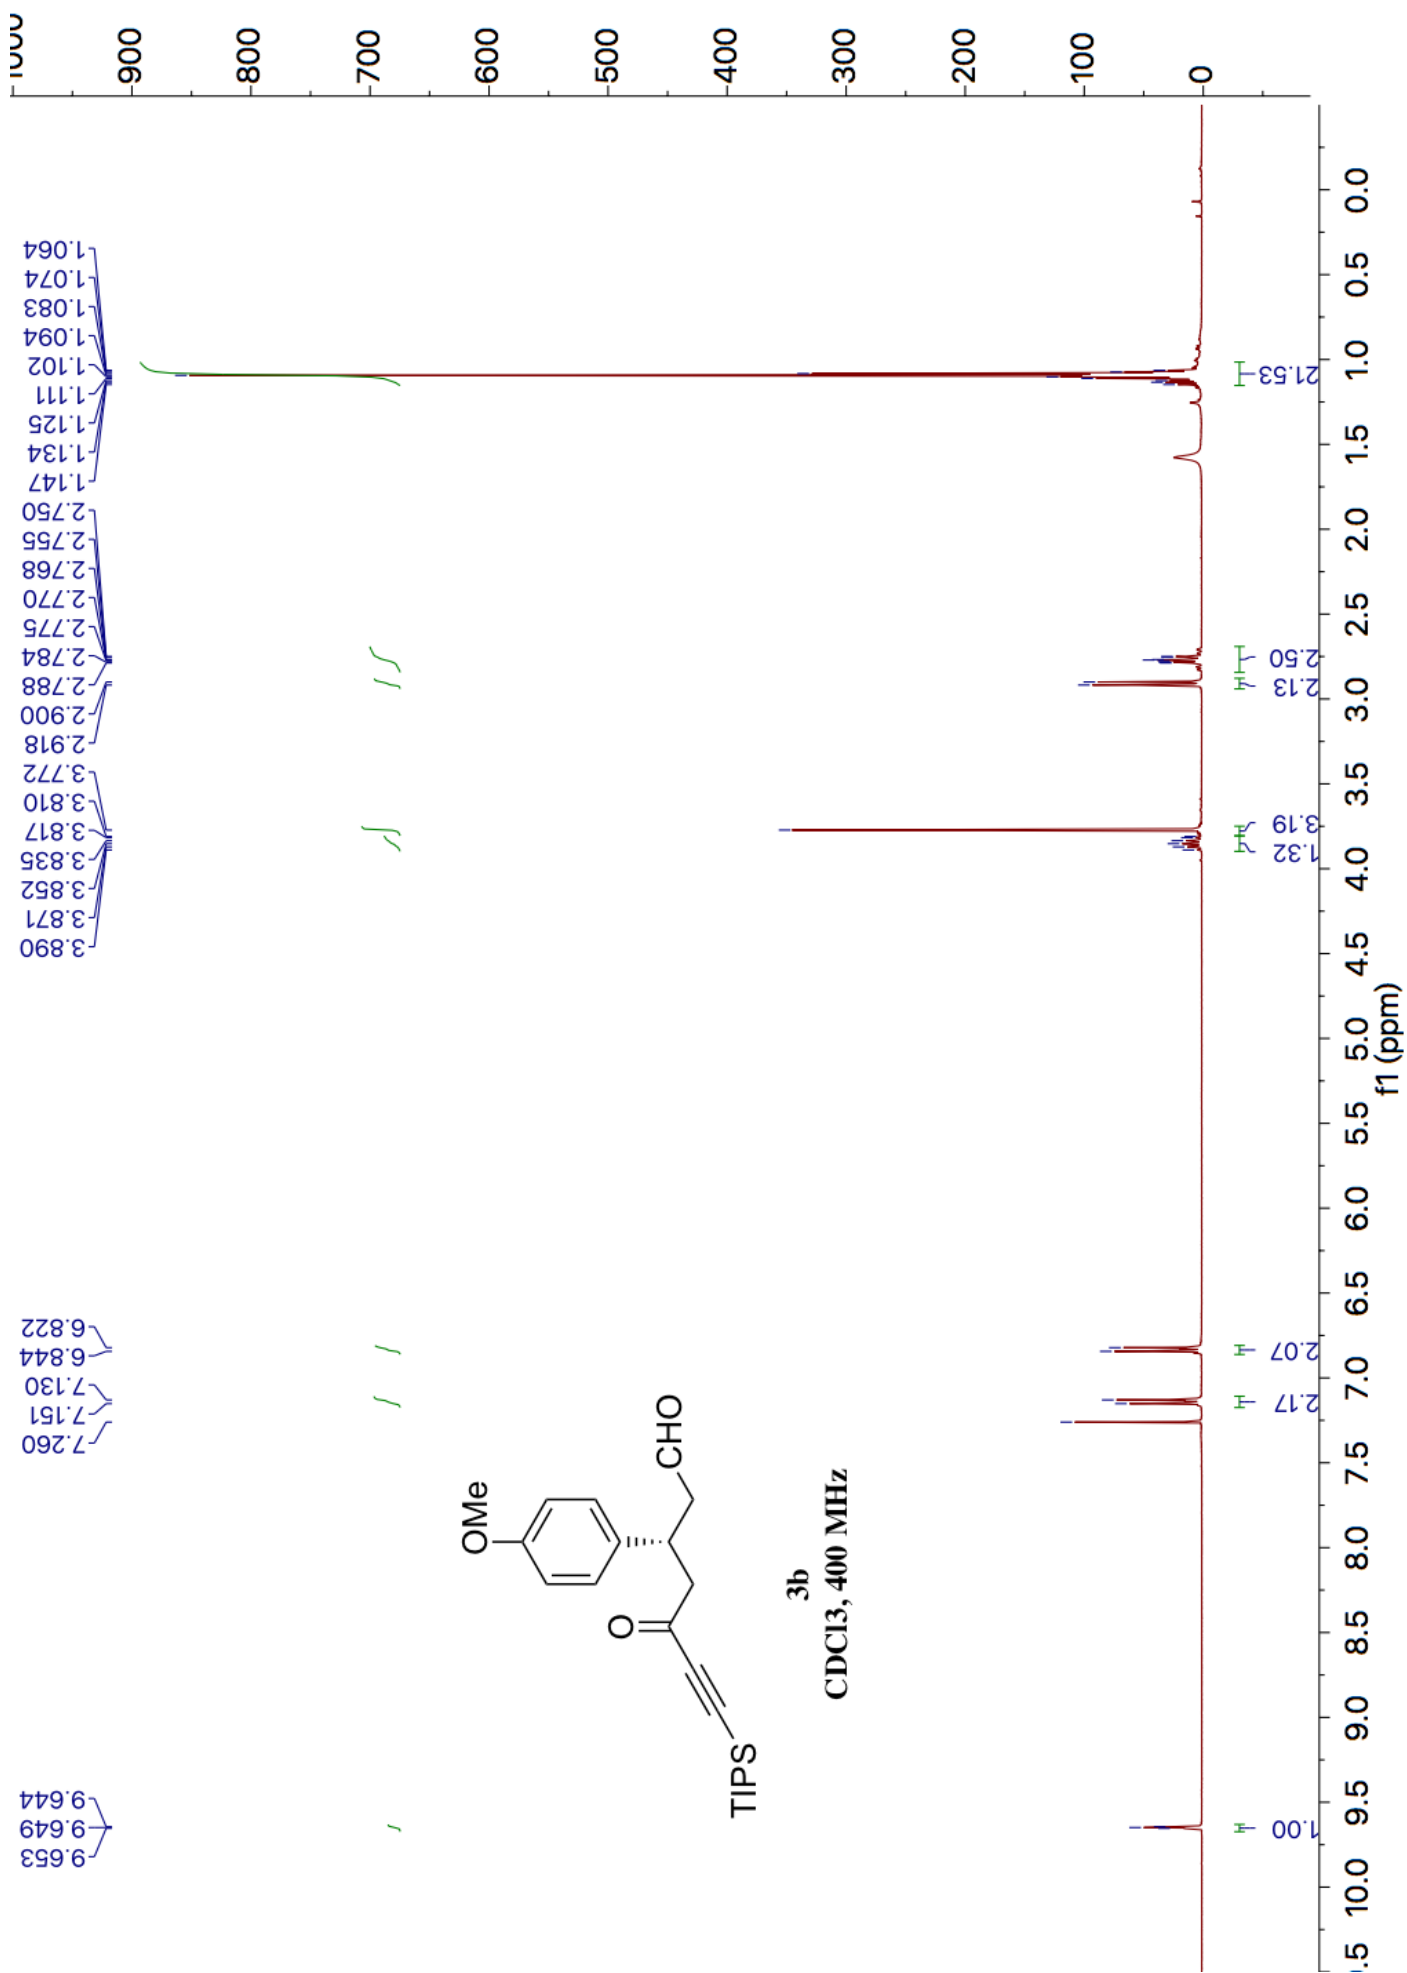

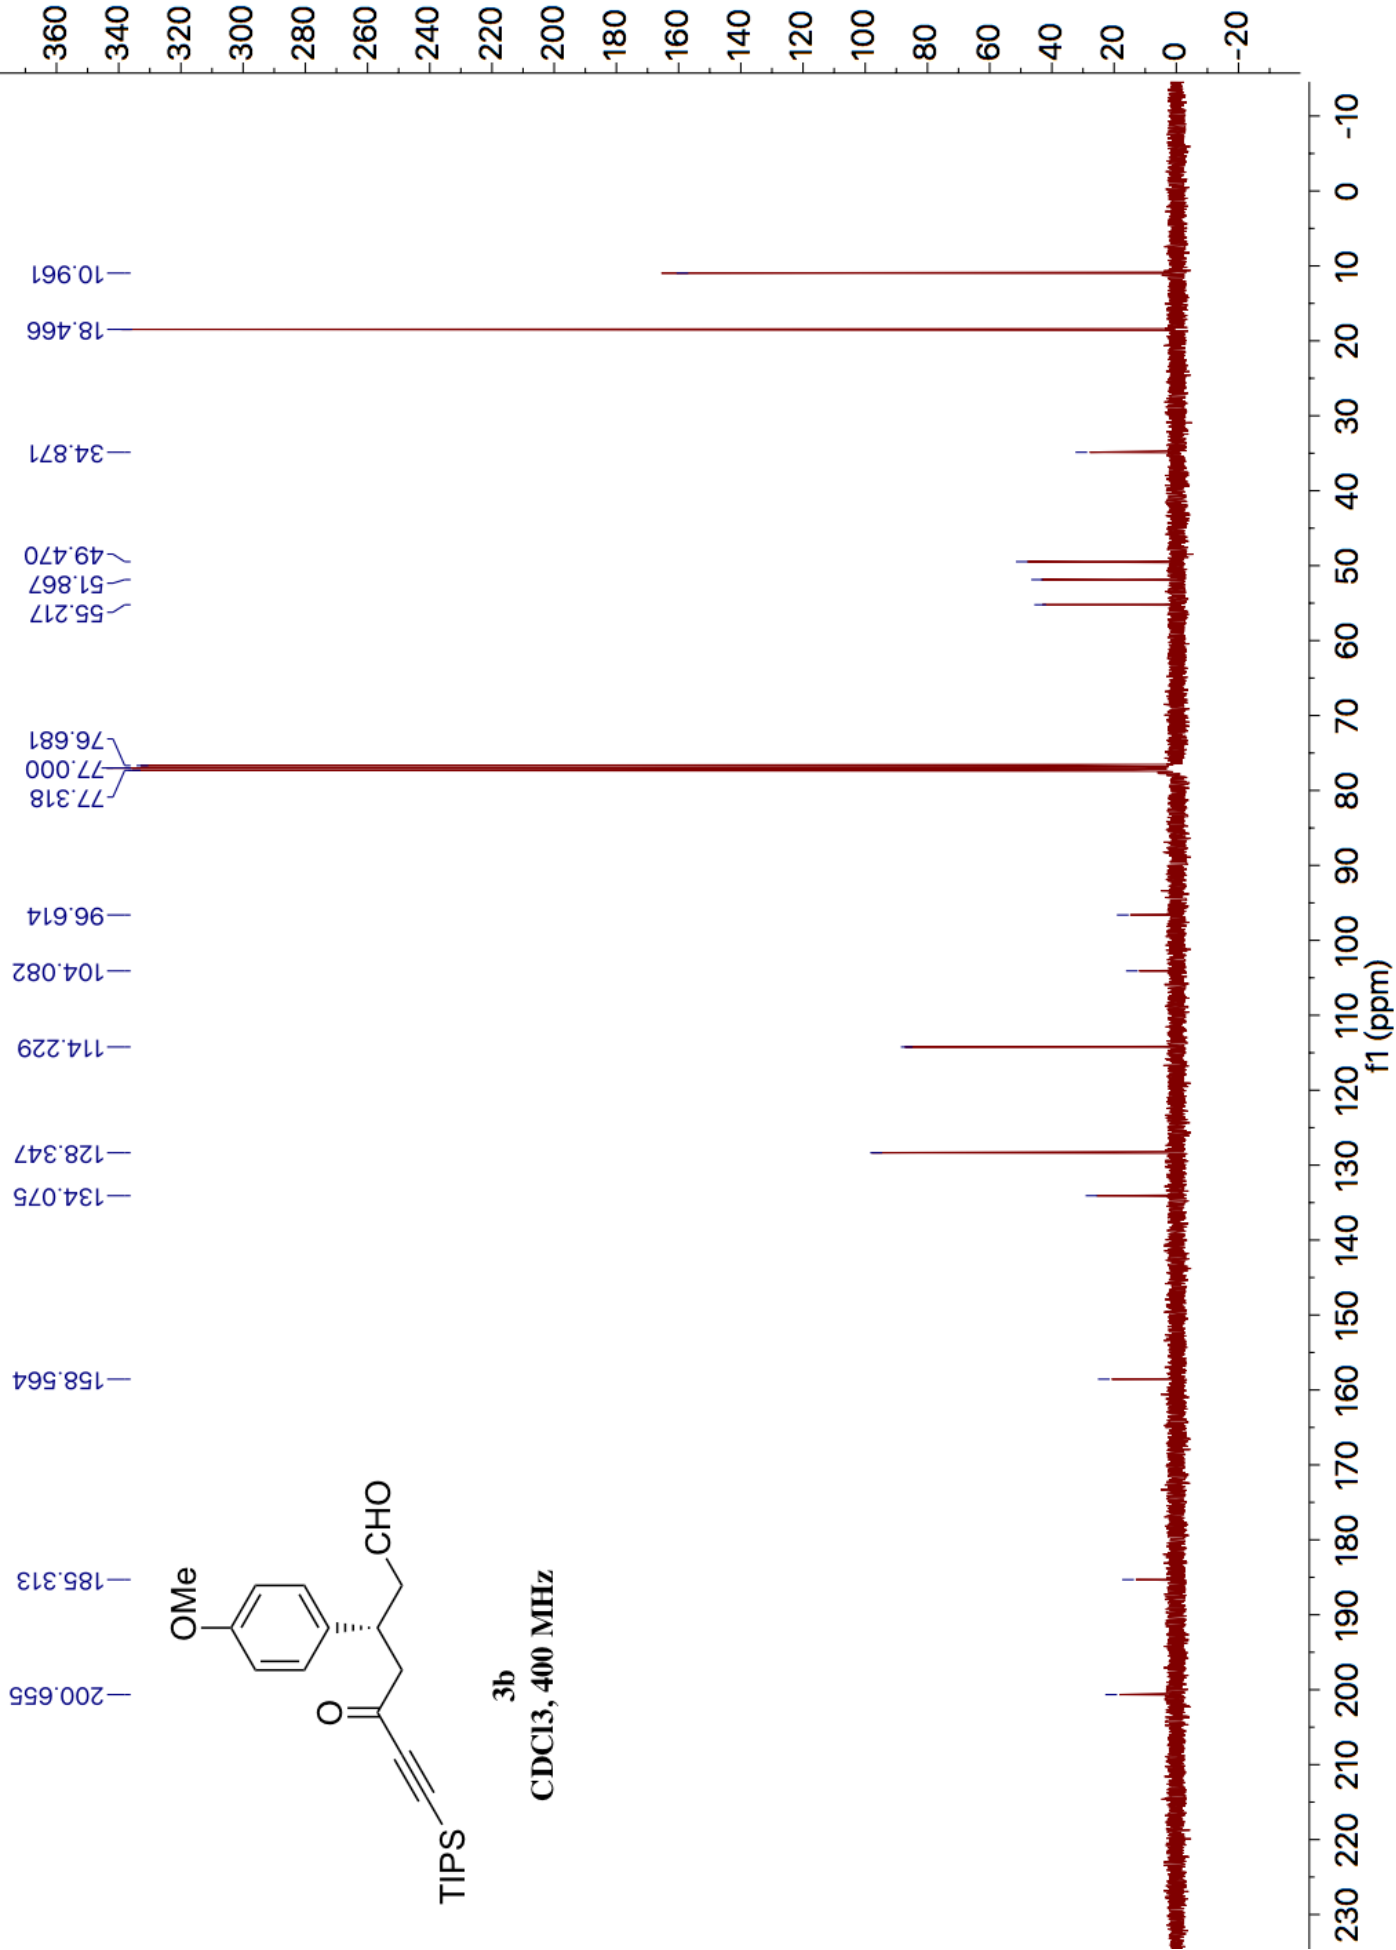

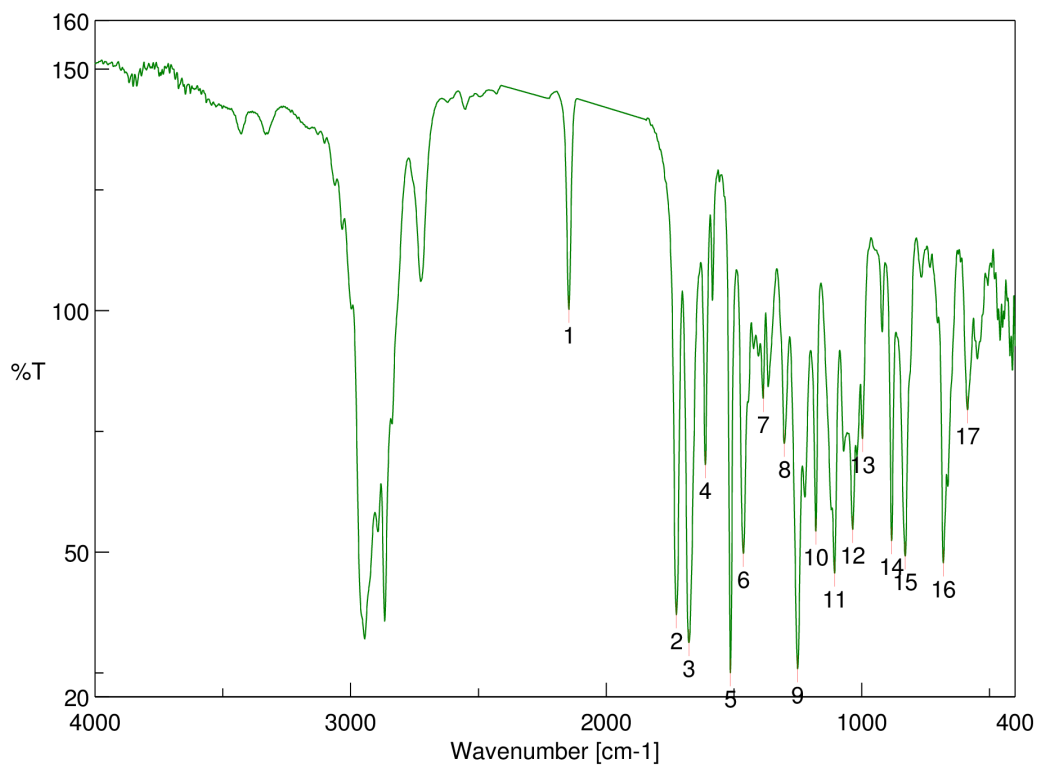

[ ピーク検出結果 ]

| No. | 位置      | 強度      | No. | 位置      | 強度      |
|-----|---------|---------|-----|---------|---------|
| 1   | 2146.38 | 100.199 | 2   | 1725.01 | 36.9878 |
| 3   | 1675.84 | 31.2231 | 4   | 1612.2  | 68.0906 |
| 5   | 1513.85 | 25.0181 | 6   | 1463.71 | 49.7064 |
| 7   | 1385.6  | 81.7601 | 8   | 1302.68 | 72.4826 |
| 9   | 1250.61 | 25.8514 | 10  | 1179.26 | 54.3048 |
| 11  | 1105.98 | 45.6517 | 12  | 1035.59 | 54.6377 |
| 13  | 997.017 | 73.504  | 14  | 883.238 | 52.306  |
| 15  | 830.205 | 49.1953 | 16  | 680.749 | 47.7322 |
| 17  | 586.254 | 79.4357 |     |         |         |

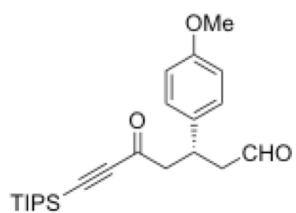

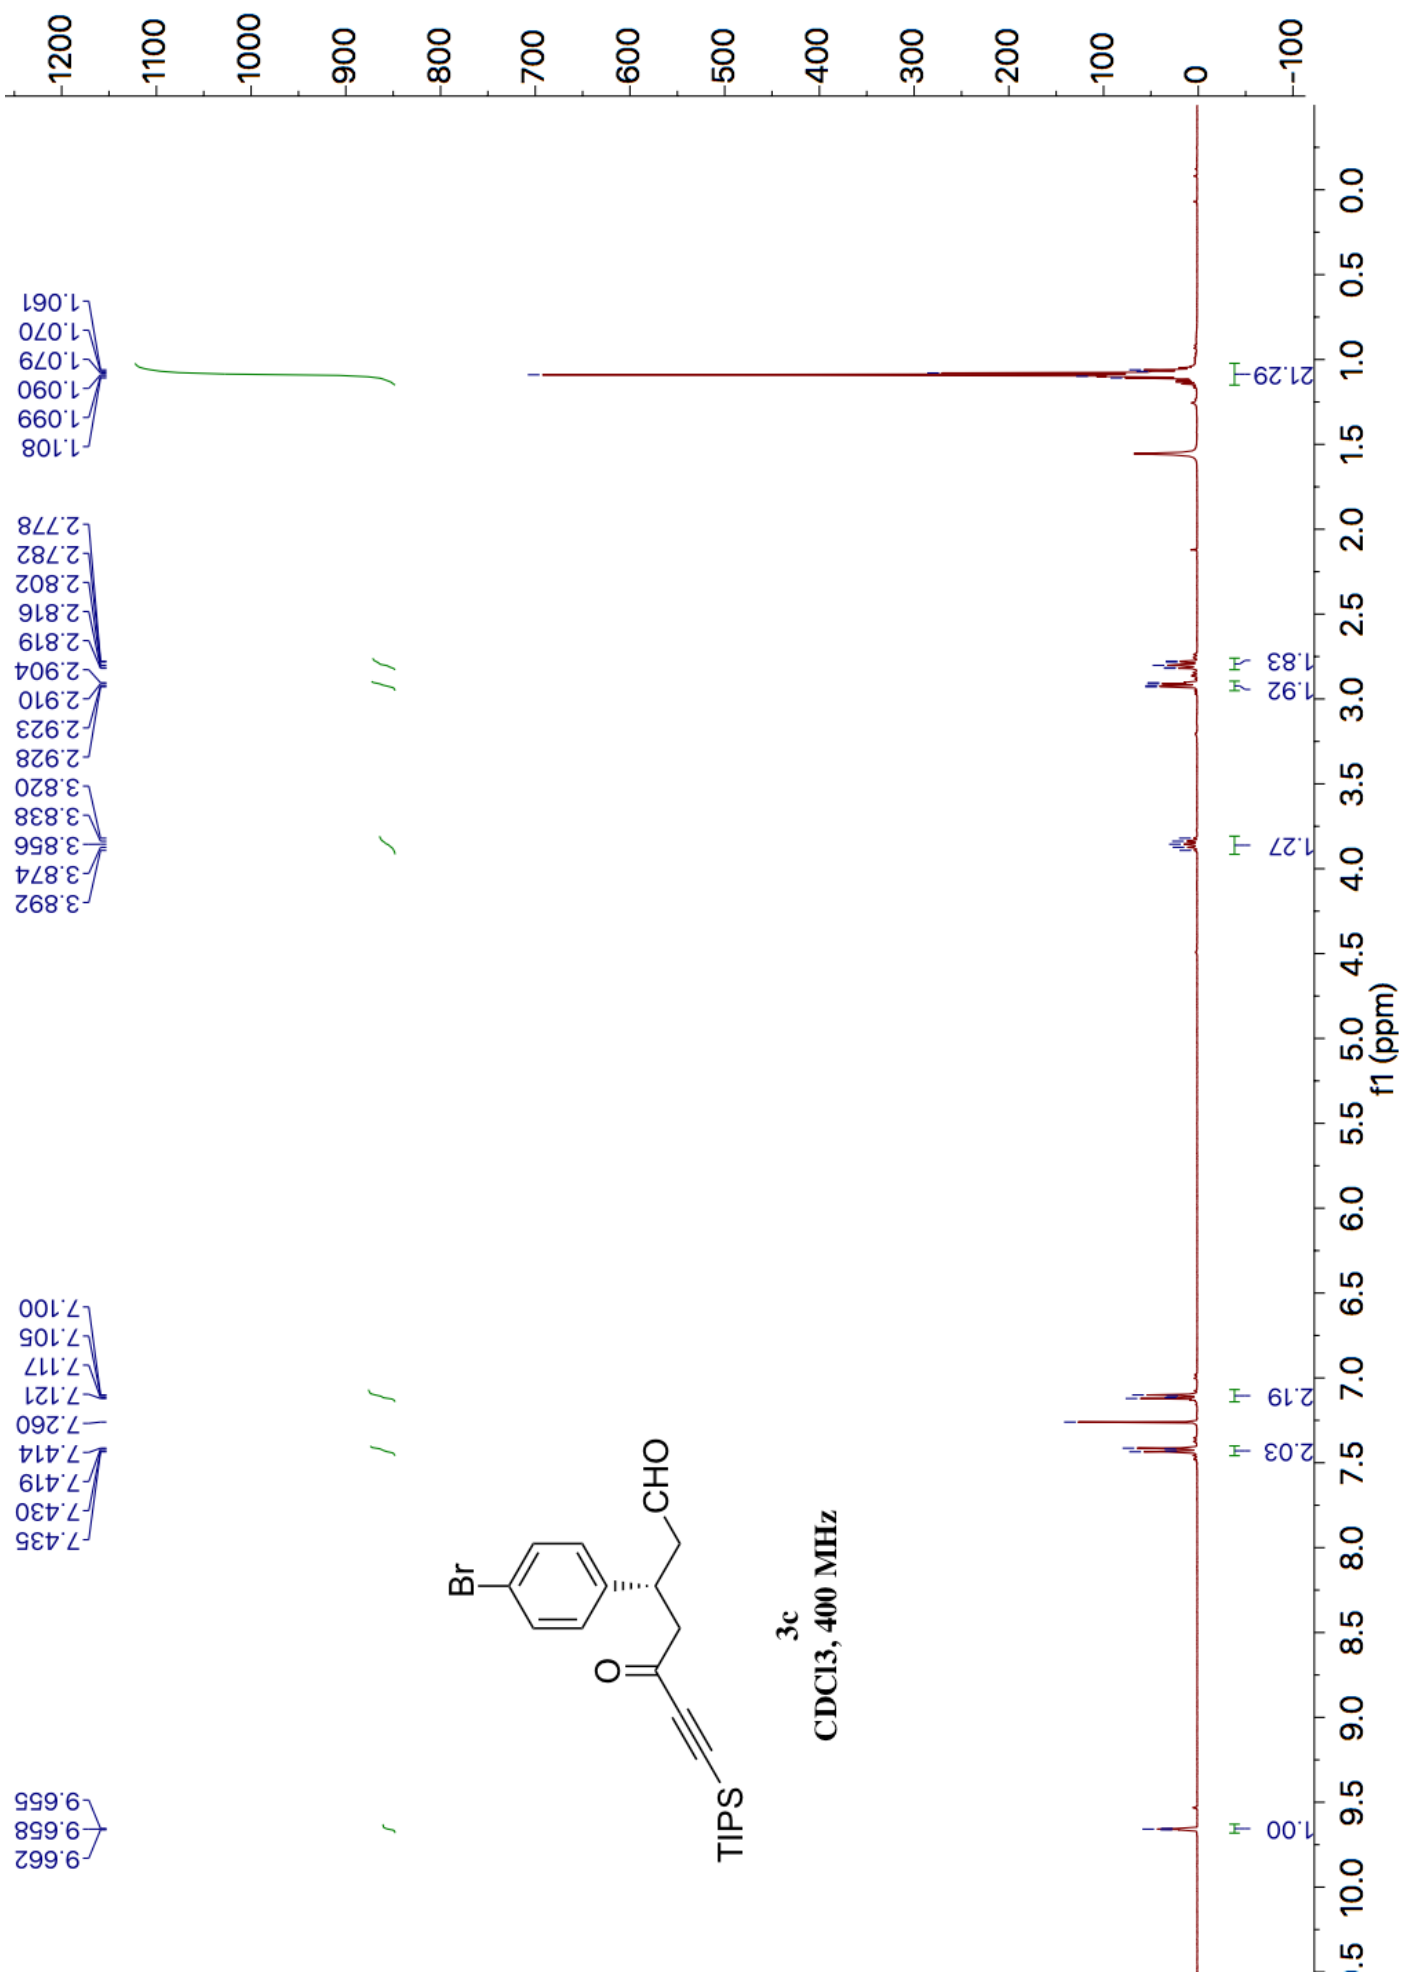



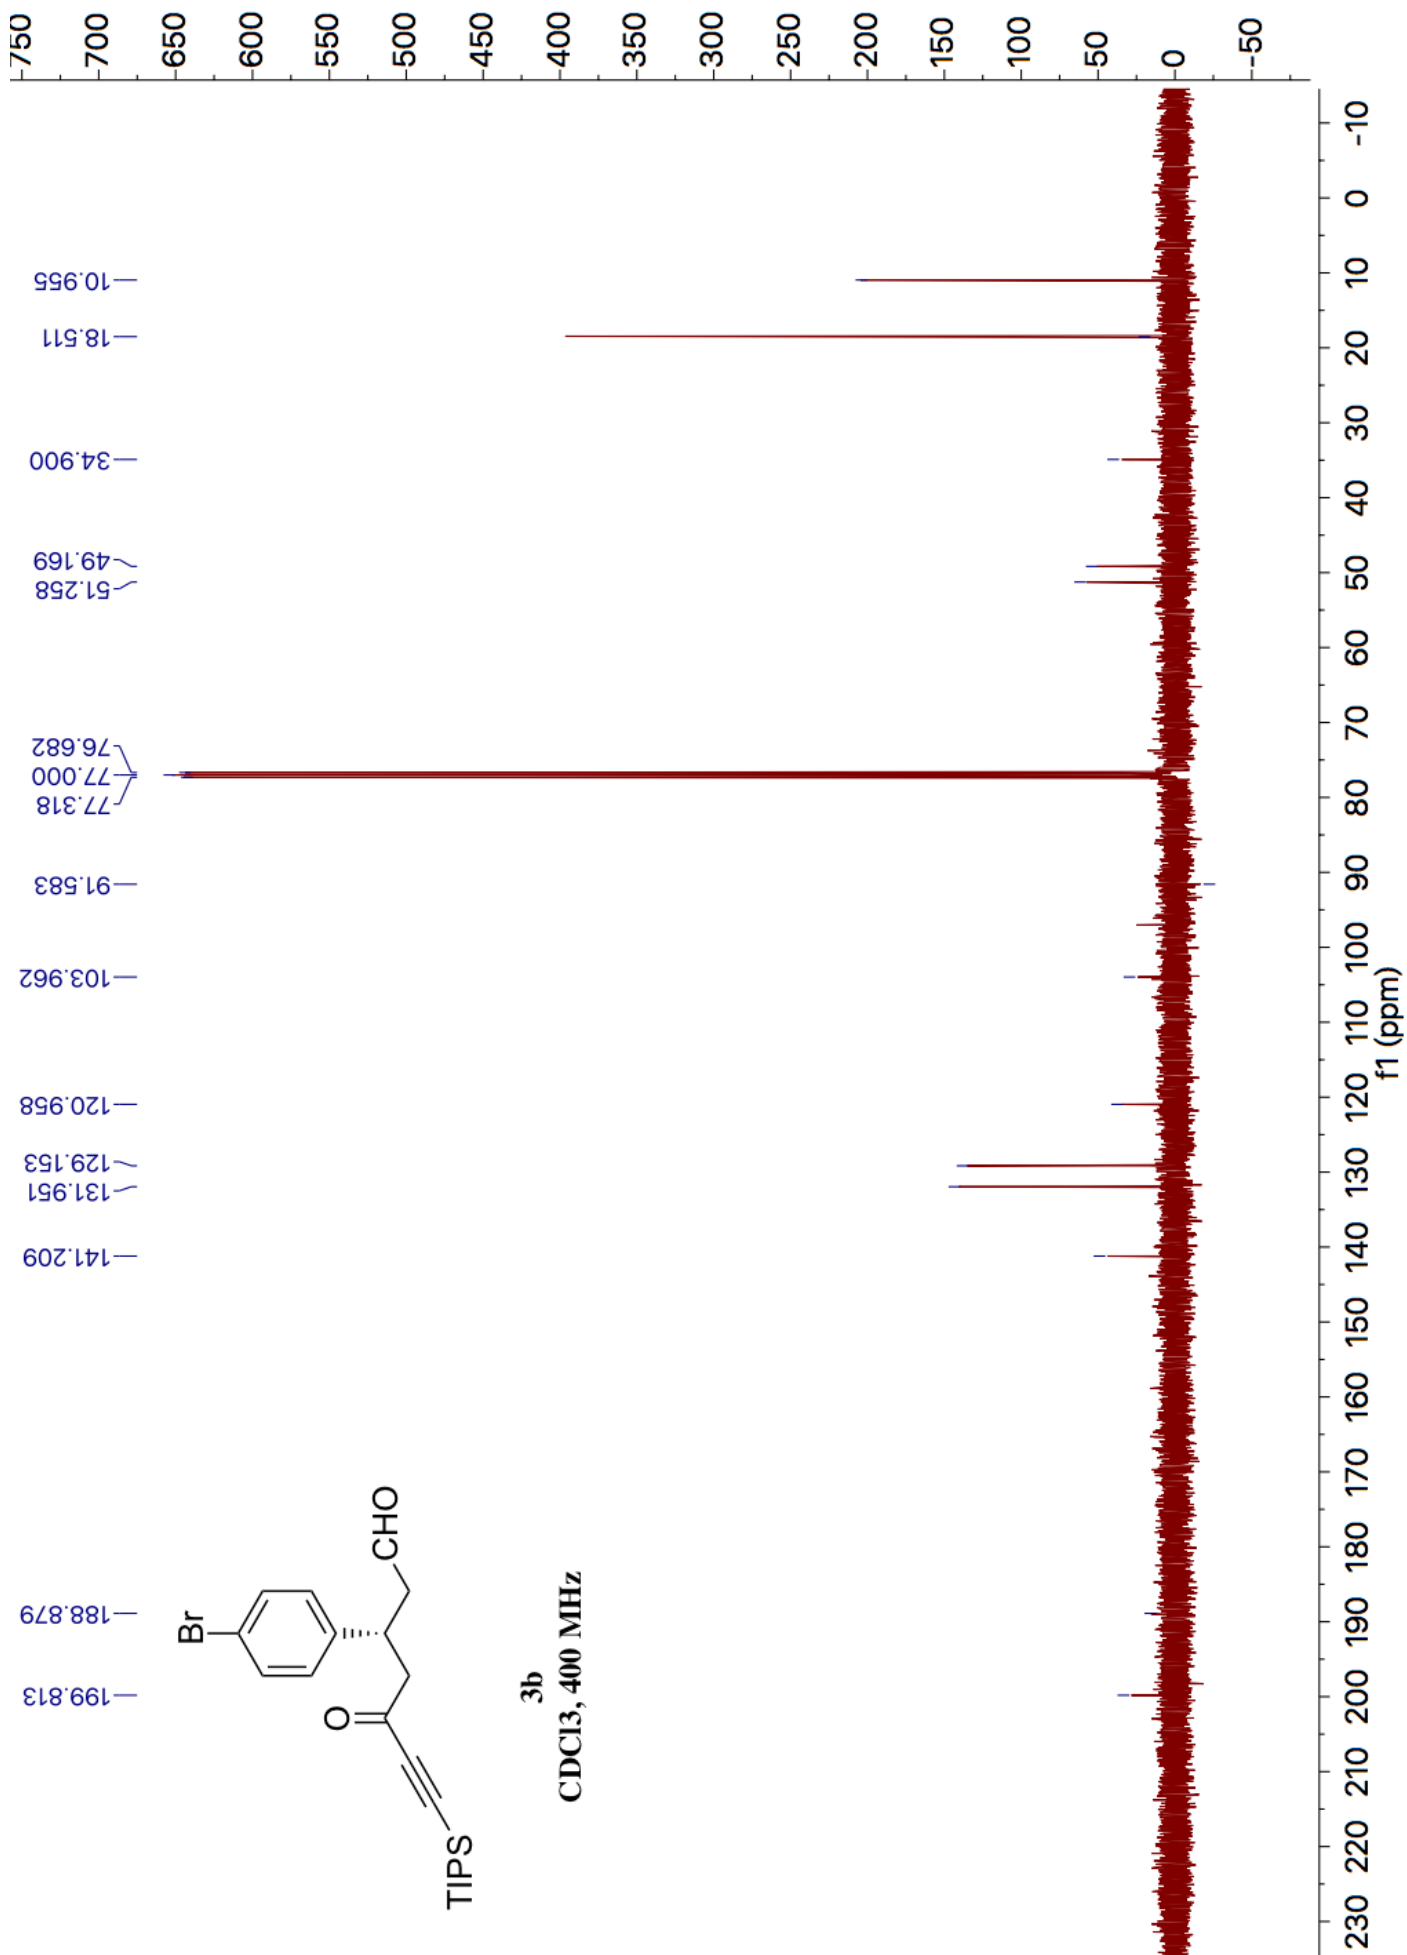

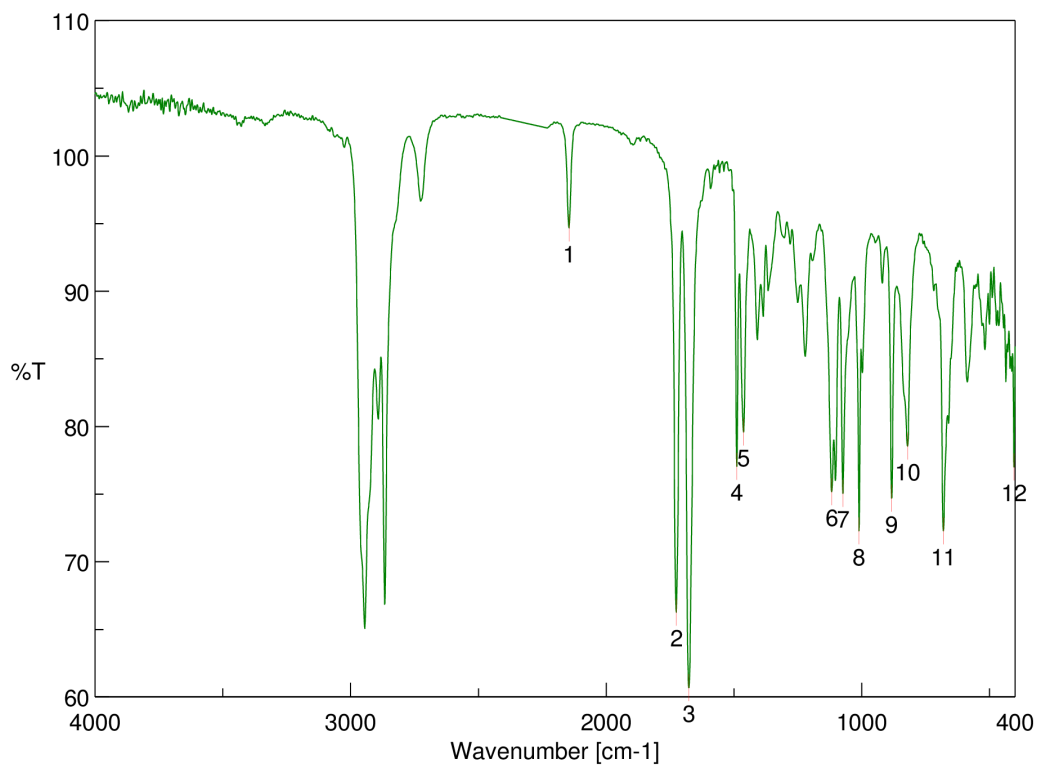

[ピーク検出結果]

| No. | 位置      | 強度      | No. | 位置      | 強度      |
|-----|---------|---------|-----|---------|---------|
| 1   | 2145.42 | 94.6656 | 2   | 1725.98 | 66.2595 |
| 3   | 1676.8  | 60.68   | 4   | 1488.78 | 77.0398 |
| 5   | 1462.74 | 79.5739 | 6   | 1117.55 | 75.1742 |
| 7   | 1074.16 | 75.0461 | 8   | 1010.52 | 72.2698 |
| 9   | 883.238 | 74.6965 | 10  | 820.563 | 78.5467 |
| 11  | 680.749 | 72.2851 | 12  | 404.014 | 77.0076 |

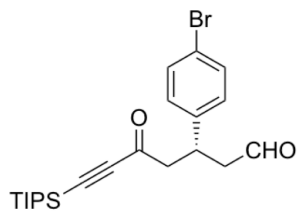

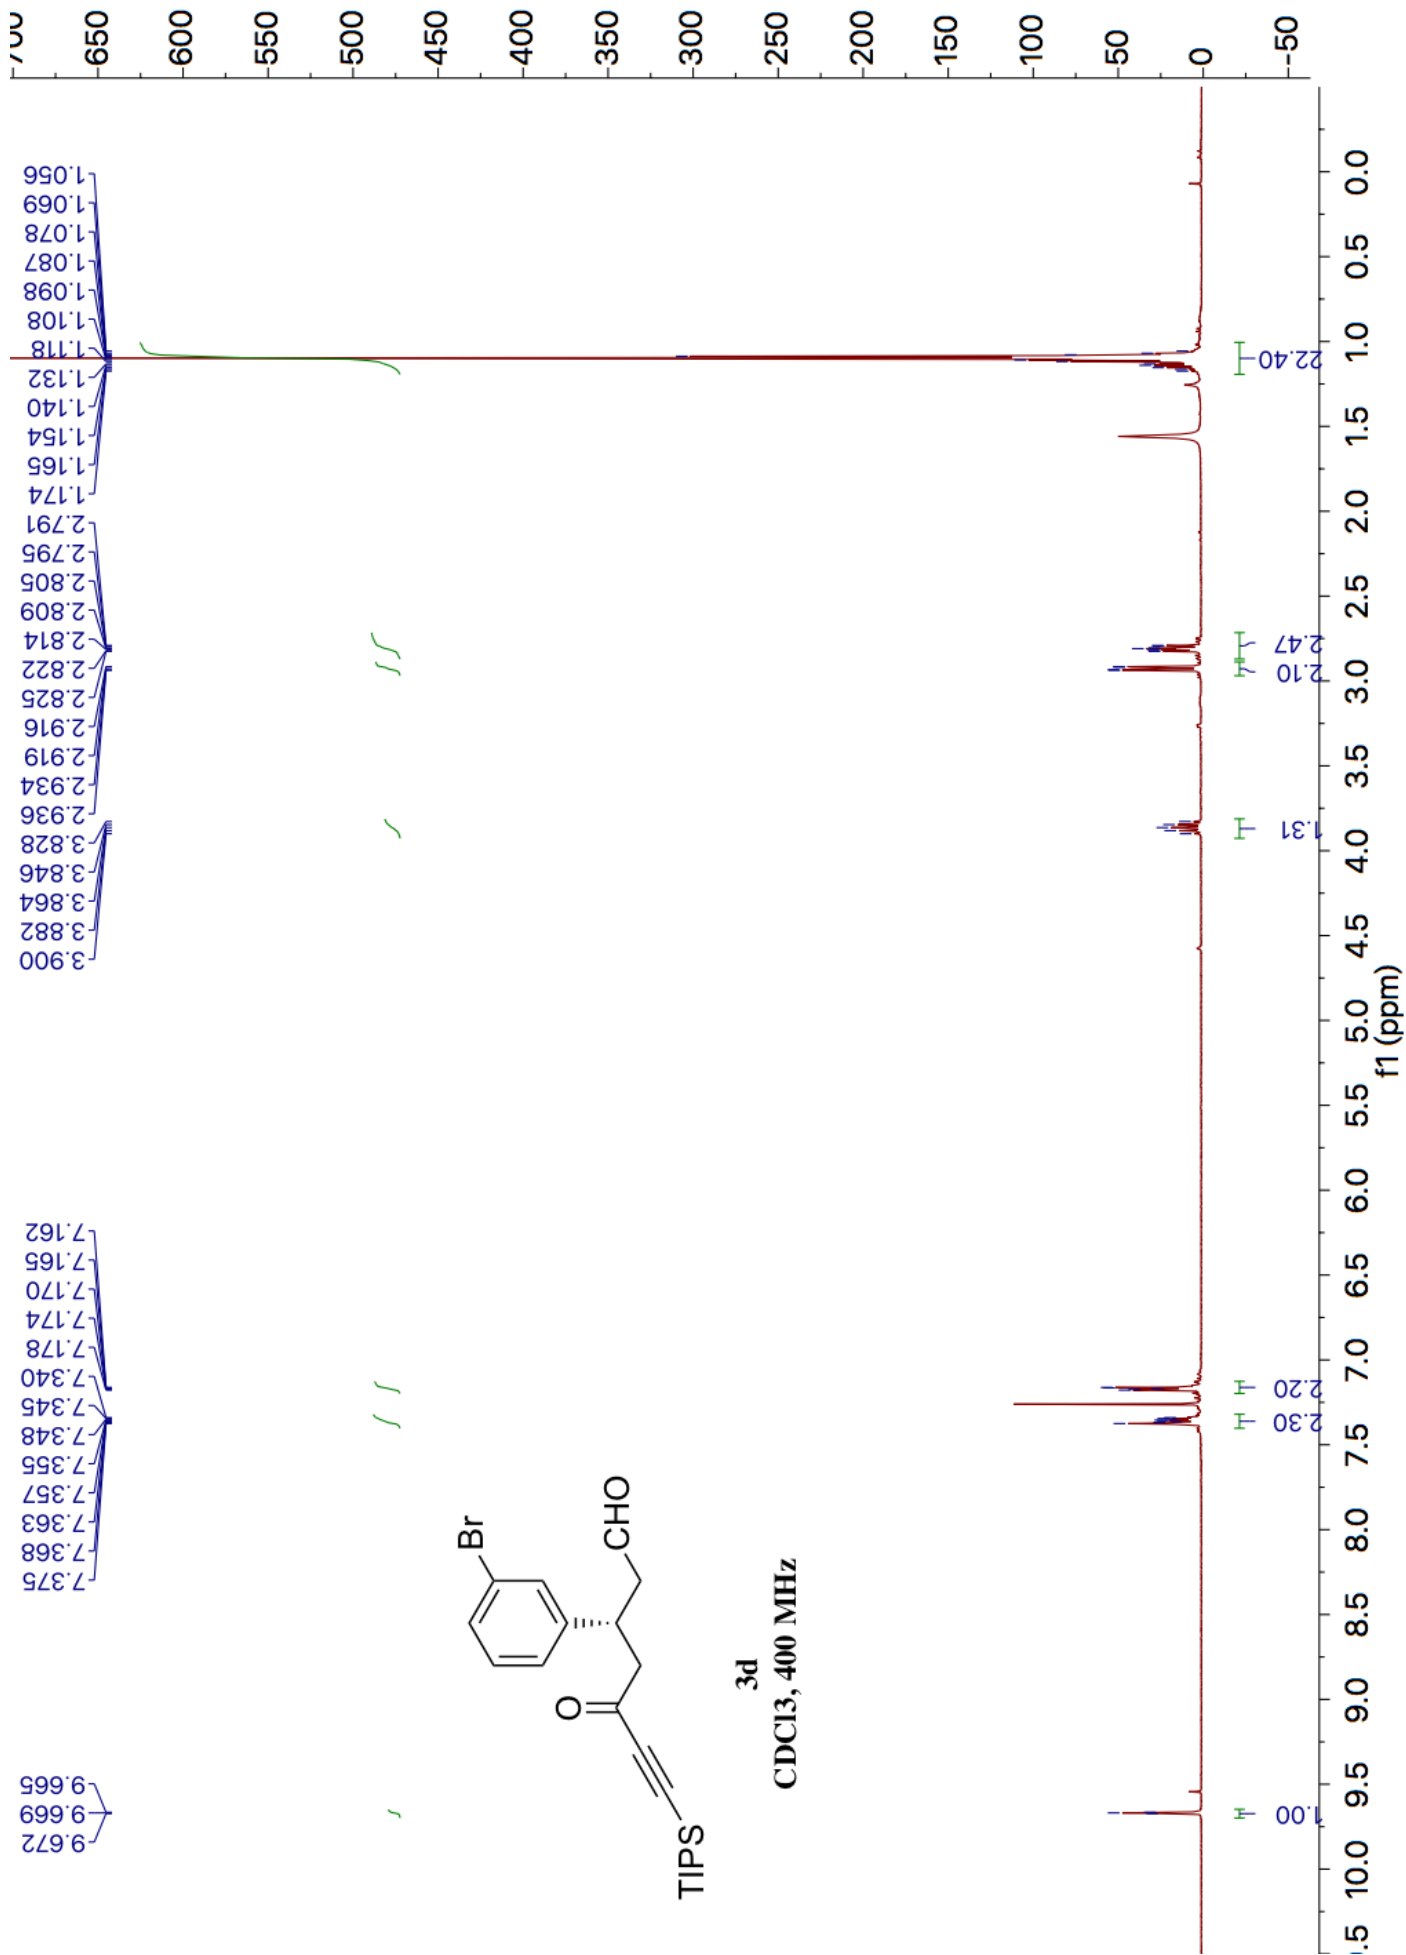

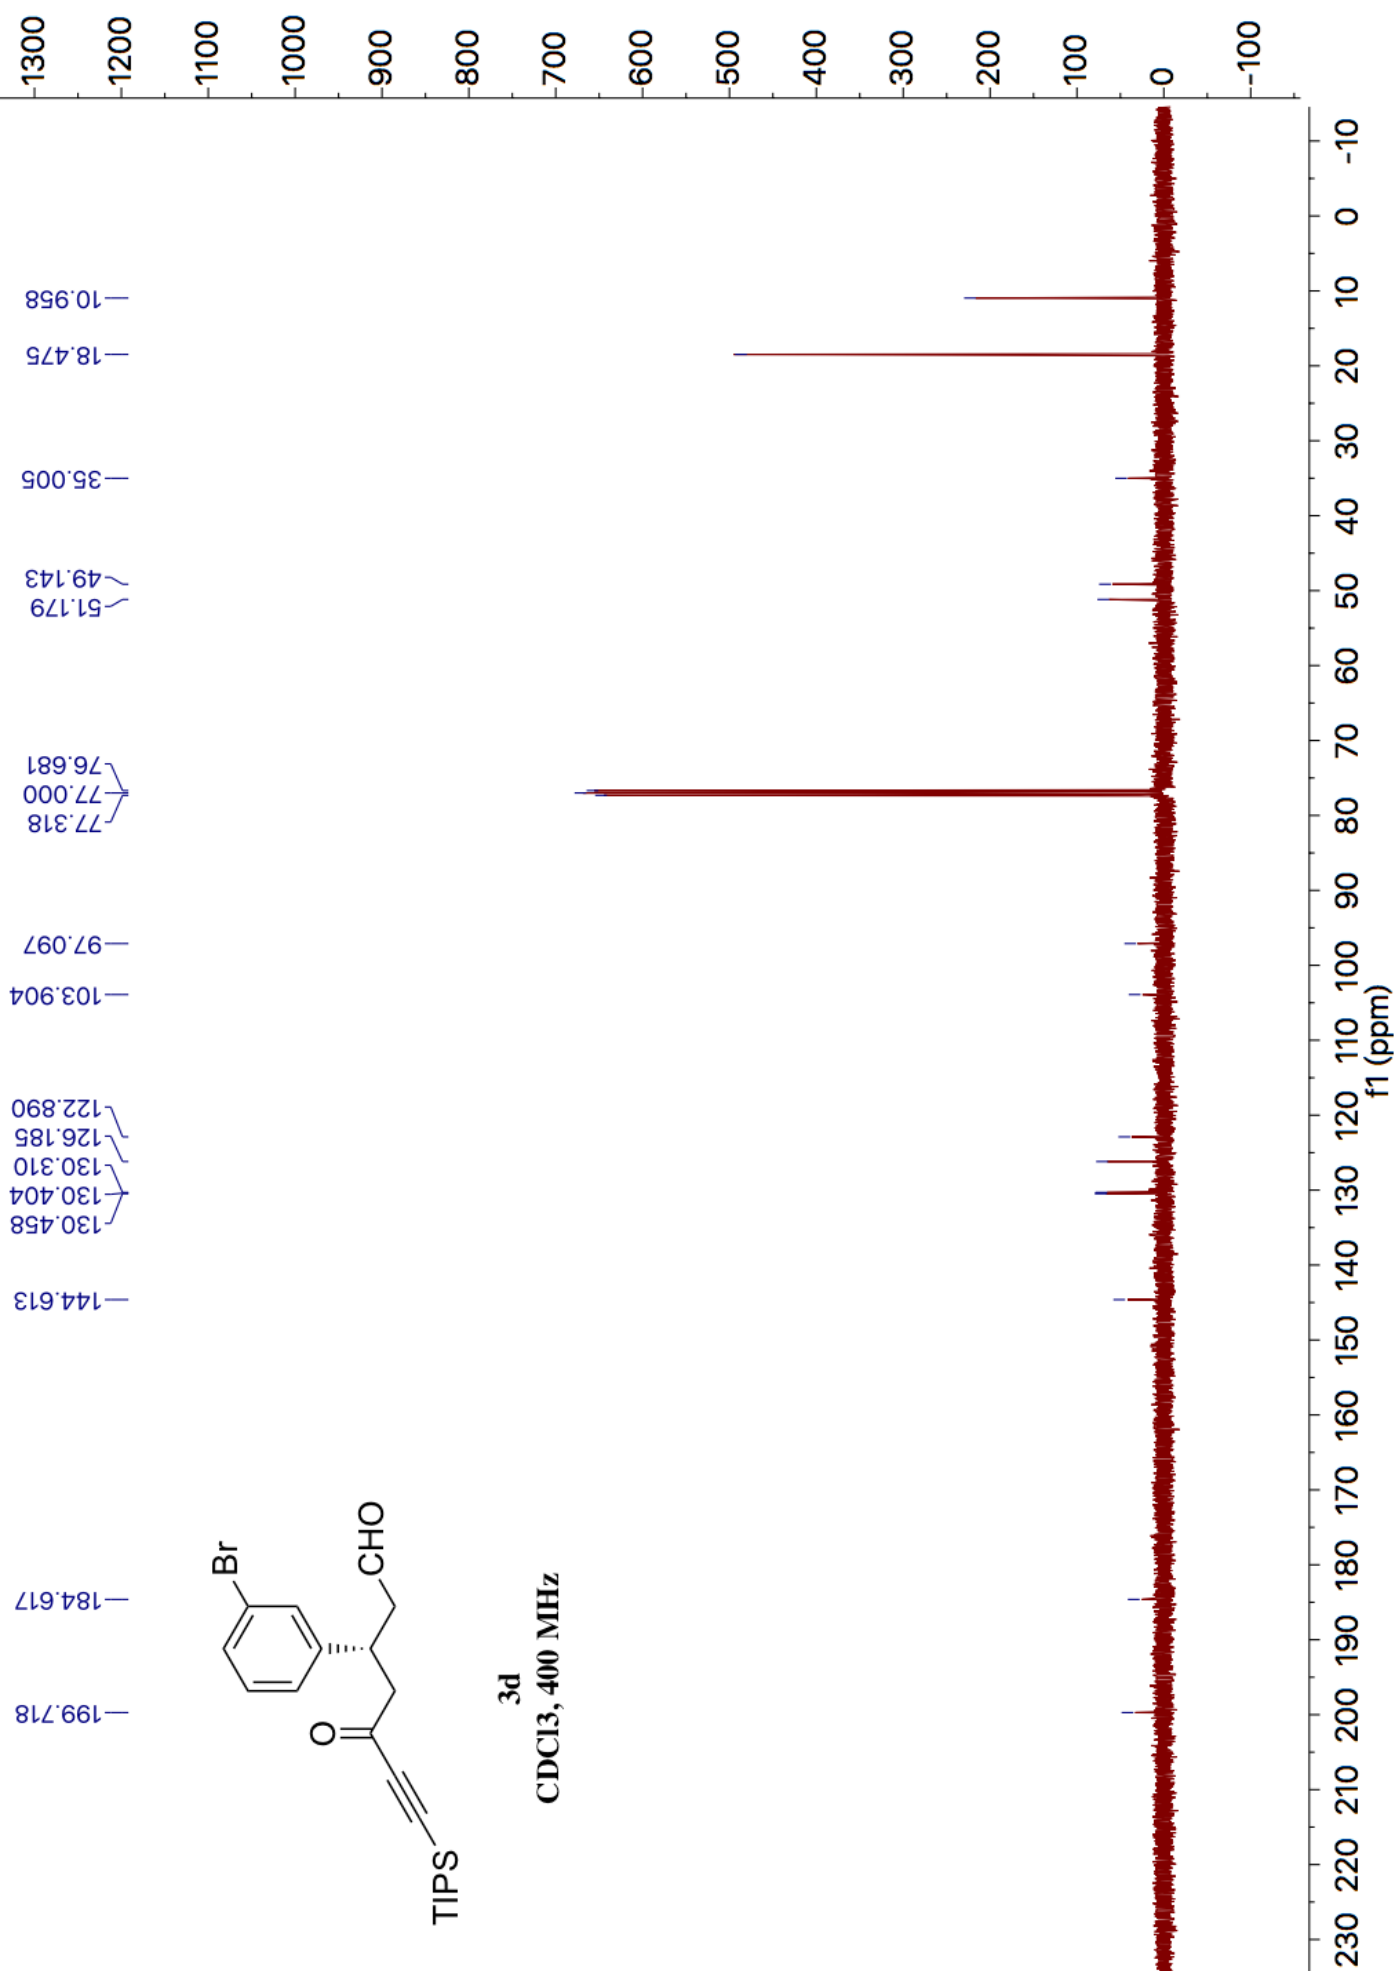

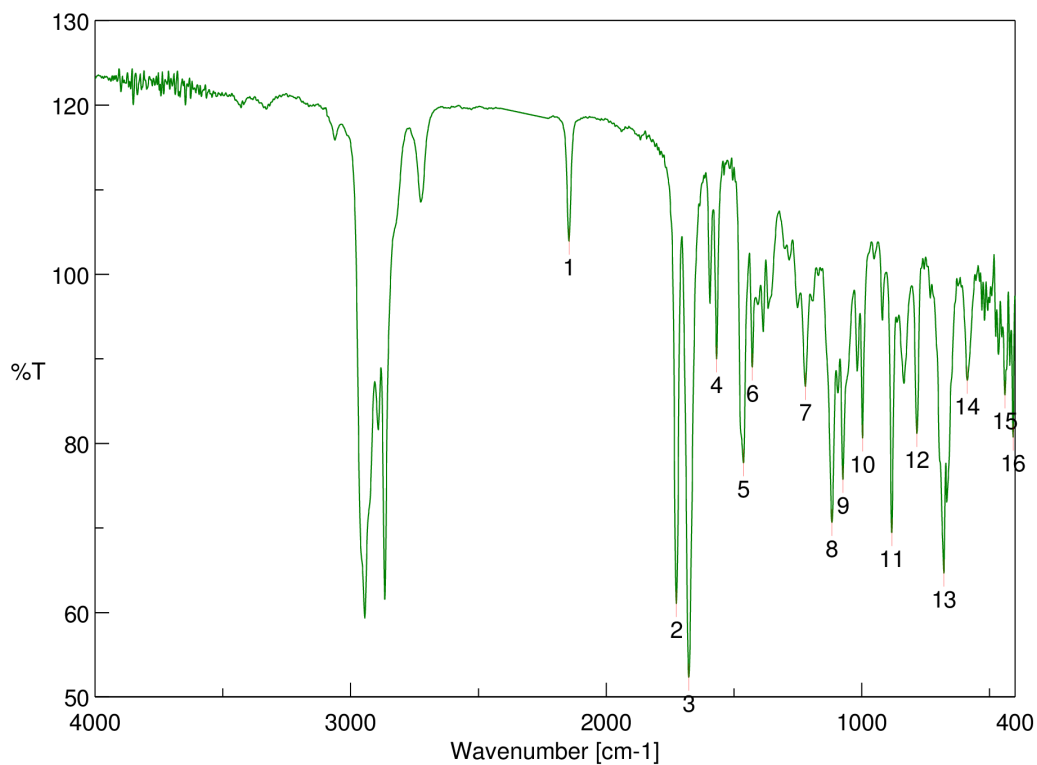

[ピーク検出結果]

| No. | 位置      | 強度      | No. | 位置      | 強度      |
|-----|---------|---------|-----|---------|---------|
| 1   | 2145.42 | 103.905 | 2   | 1725.98 | 61.0608 |
| 3   | 1676.8  | 52.3179 | 4   | 1567.84 | 89.9908 |
| 5   | 1462.74 | 77.6846 | 6   | 1428.03 | 89.0289 |
| 7   | 1220.72 | 86.7059 | 8   | 1116.58 | 70.6369 |
| 9   | 1074.16 | 75.7458 | 10  | 997.017 | 80.6148 |
| 11  | 882.274 | 69.4399 | 12  | 783.922 | 81.1542 |
| 13  | 678.82  | 64.6436 | 14  | 587.218 | 87.4619 |
| 15  | 439.69  | 85.7071 | 16  | 407.871 | 80.7341 |

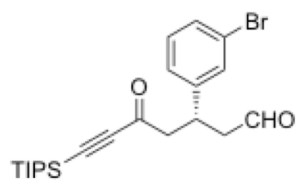

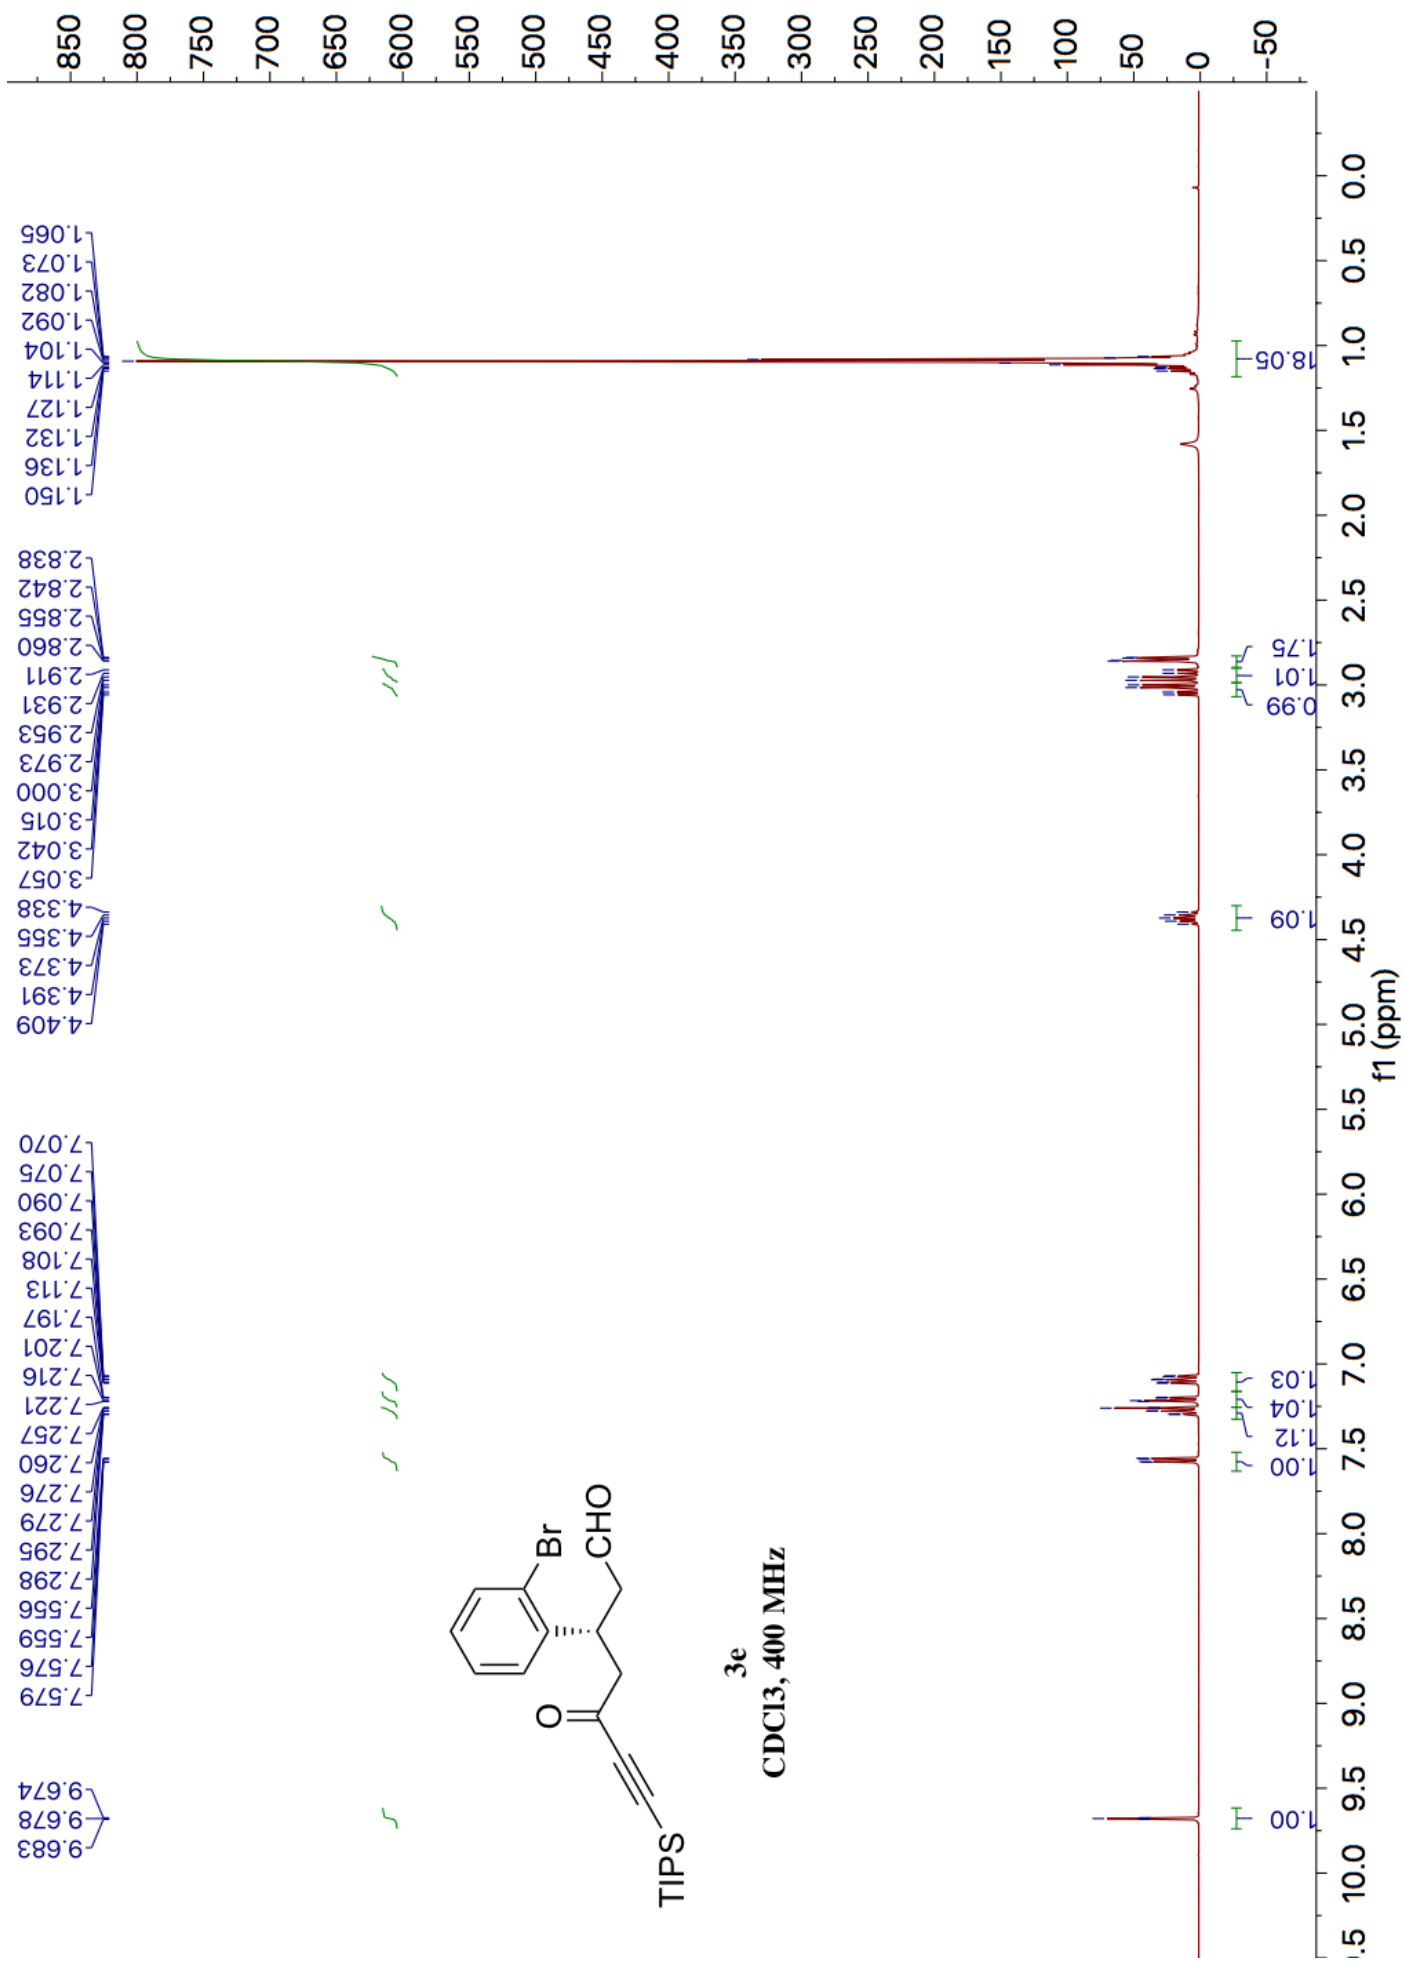

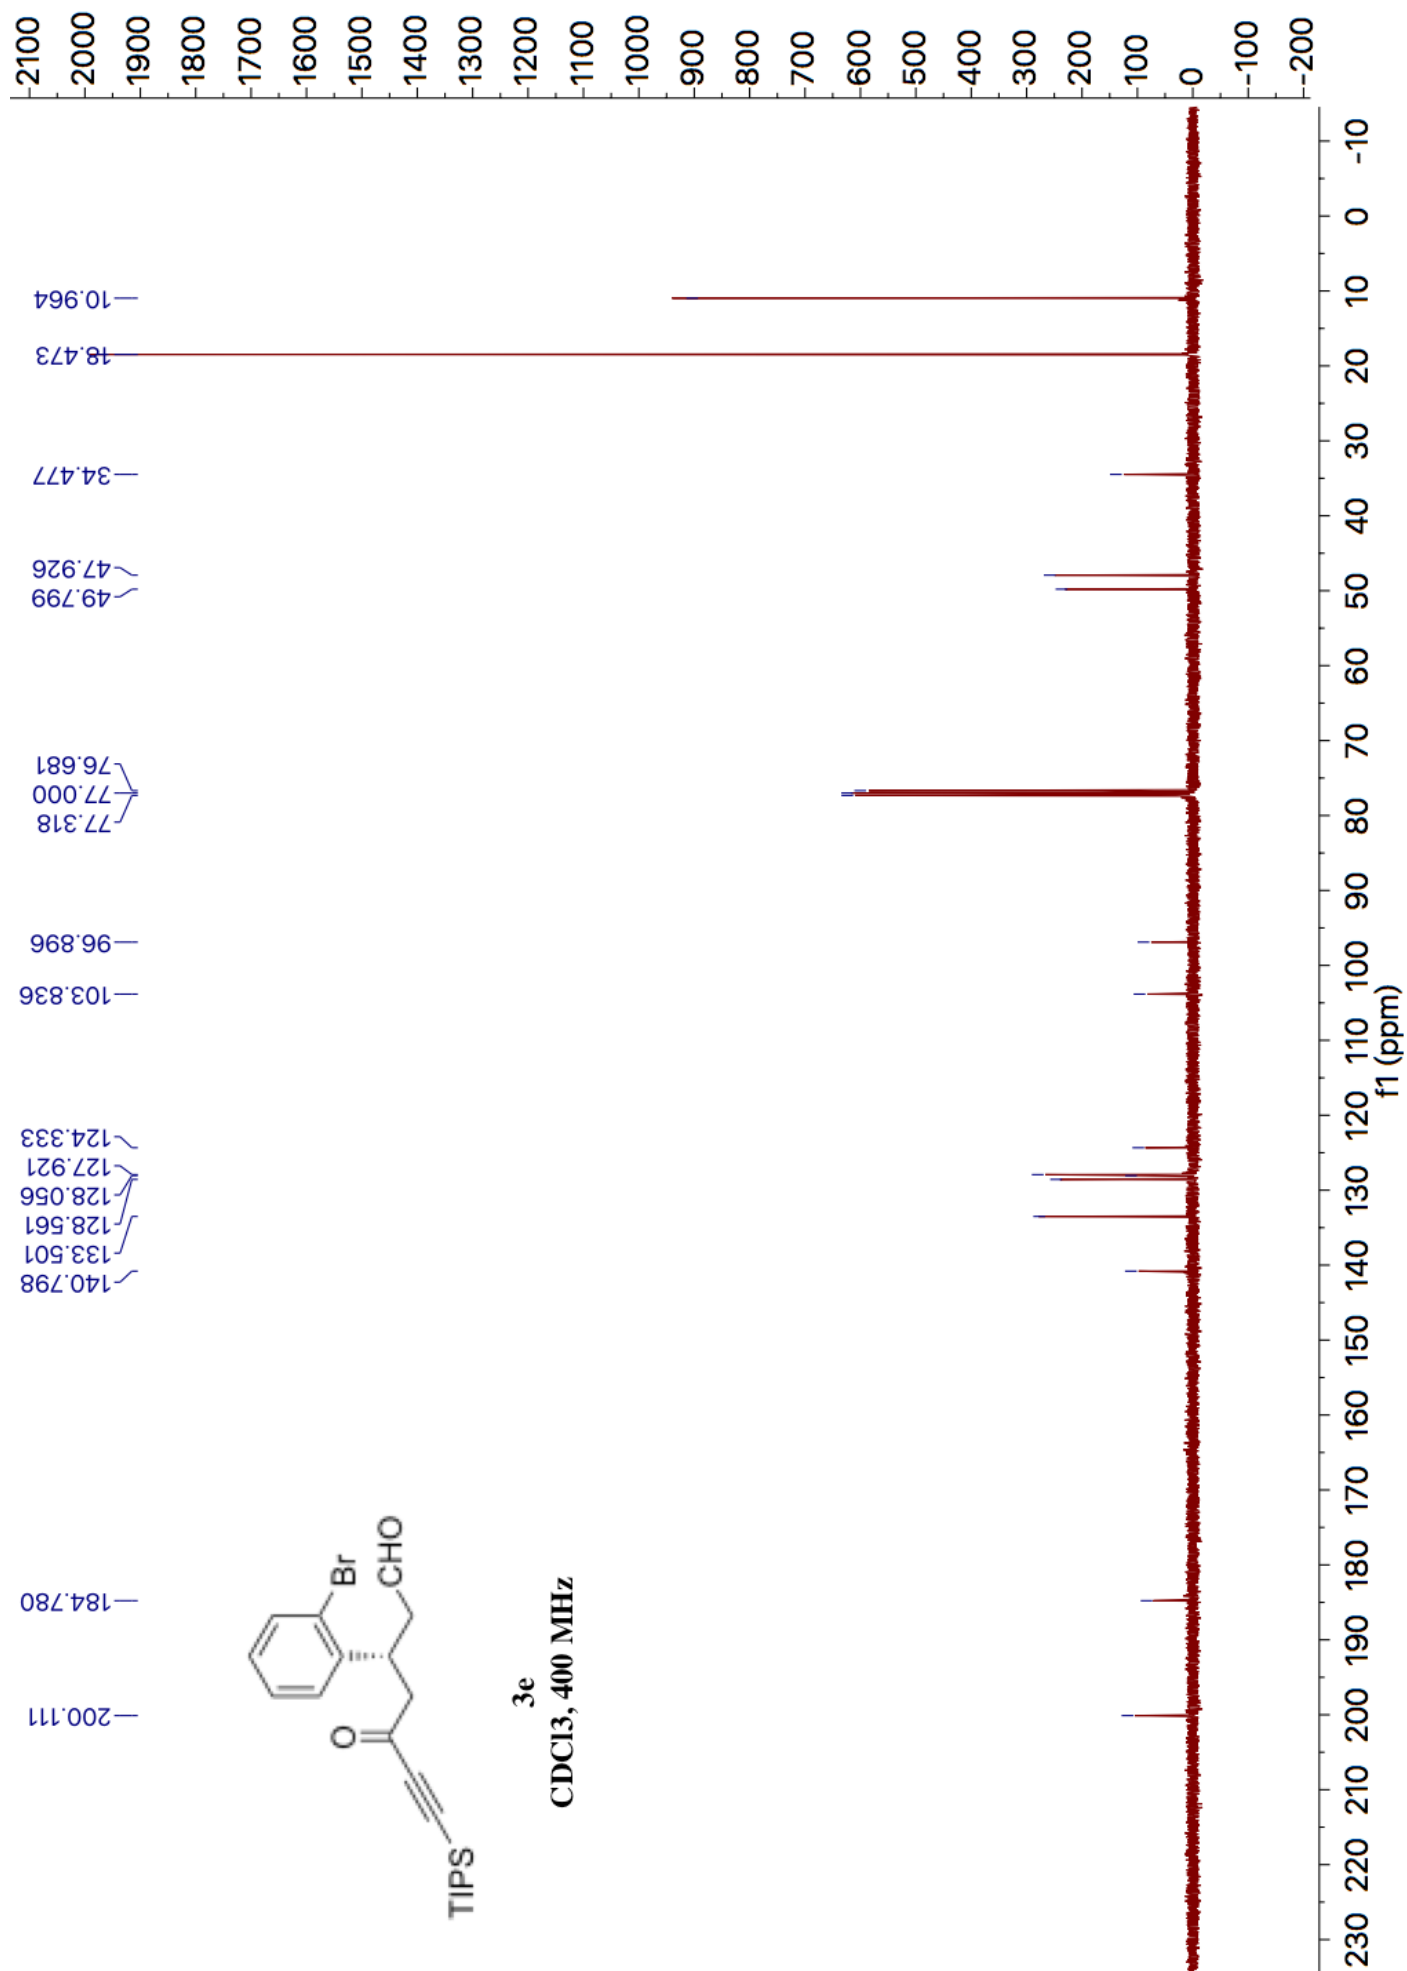

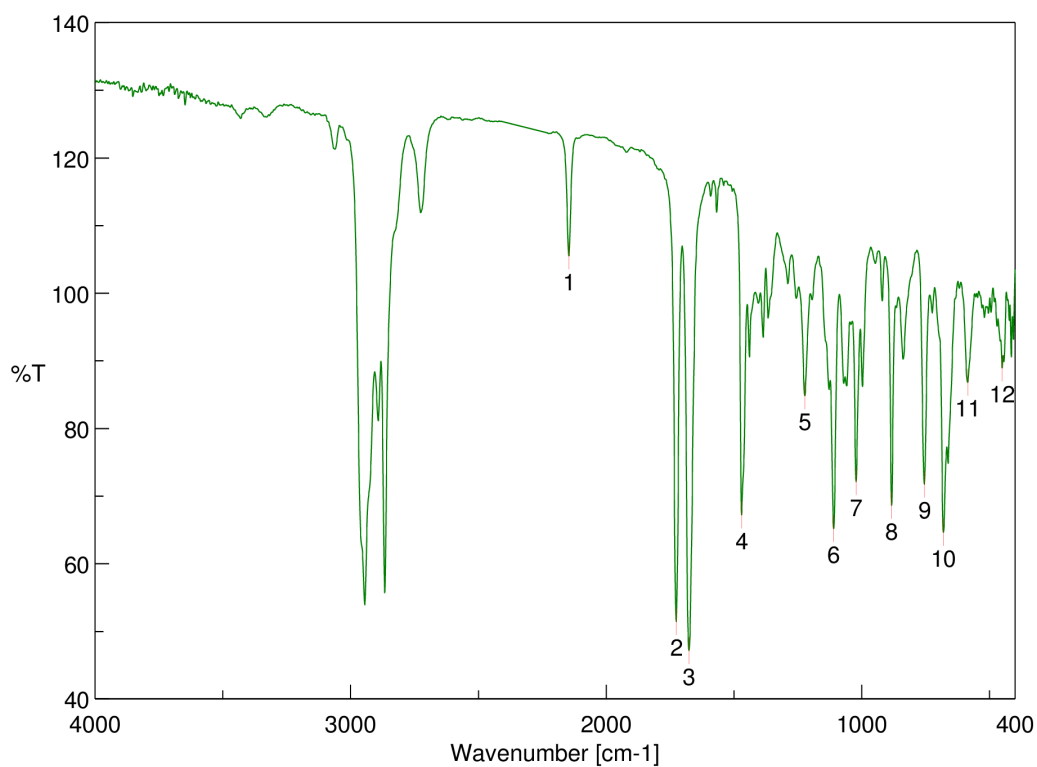

[ ピーク検出結果 ]

| No. | 位置      | 強度      | No. | 位置      | 強度      |
|-----|---------|---------|-----|---------|---------|
| 1   | 2146.38 | 105.491 | 2   | 1725.98 | 51.4454 |
| 3   | 1675.84 | 47.1698 | 4   | 1470.46 | 67.212  |
| 5   | 1222.65 | 84.8335 | 6   | 1109.83 | 65.1583 |
| 7   | 1022.09 | 72.1303 | 8   | 883.238 | 68.6319 |
| 9   | 754.995 | 71.7331 | 10  | 680.749 | 64.6486 |
| 11  | 585.29  | 86.8128 | 12  | 450.297 | 88.9388 |

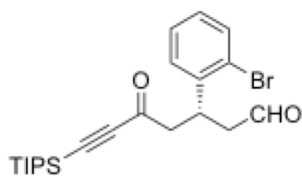



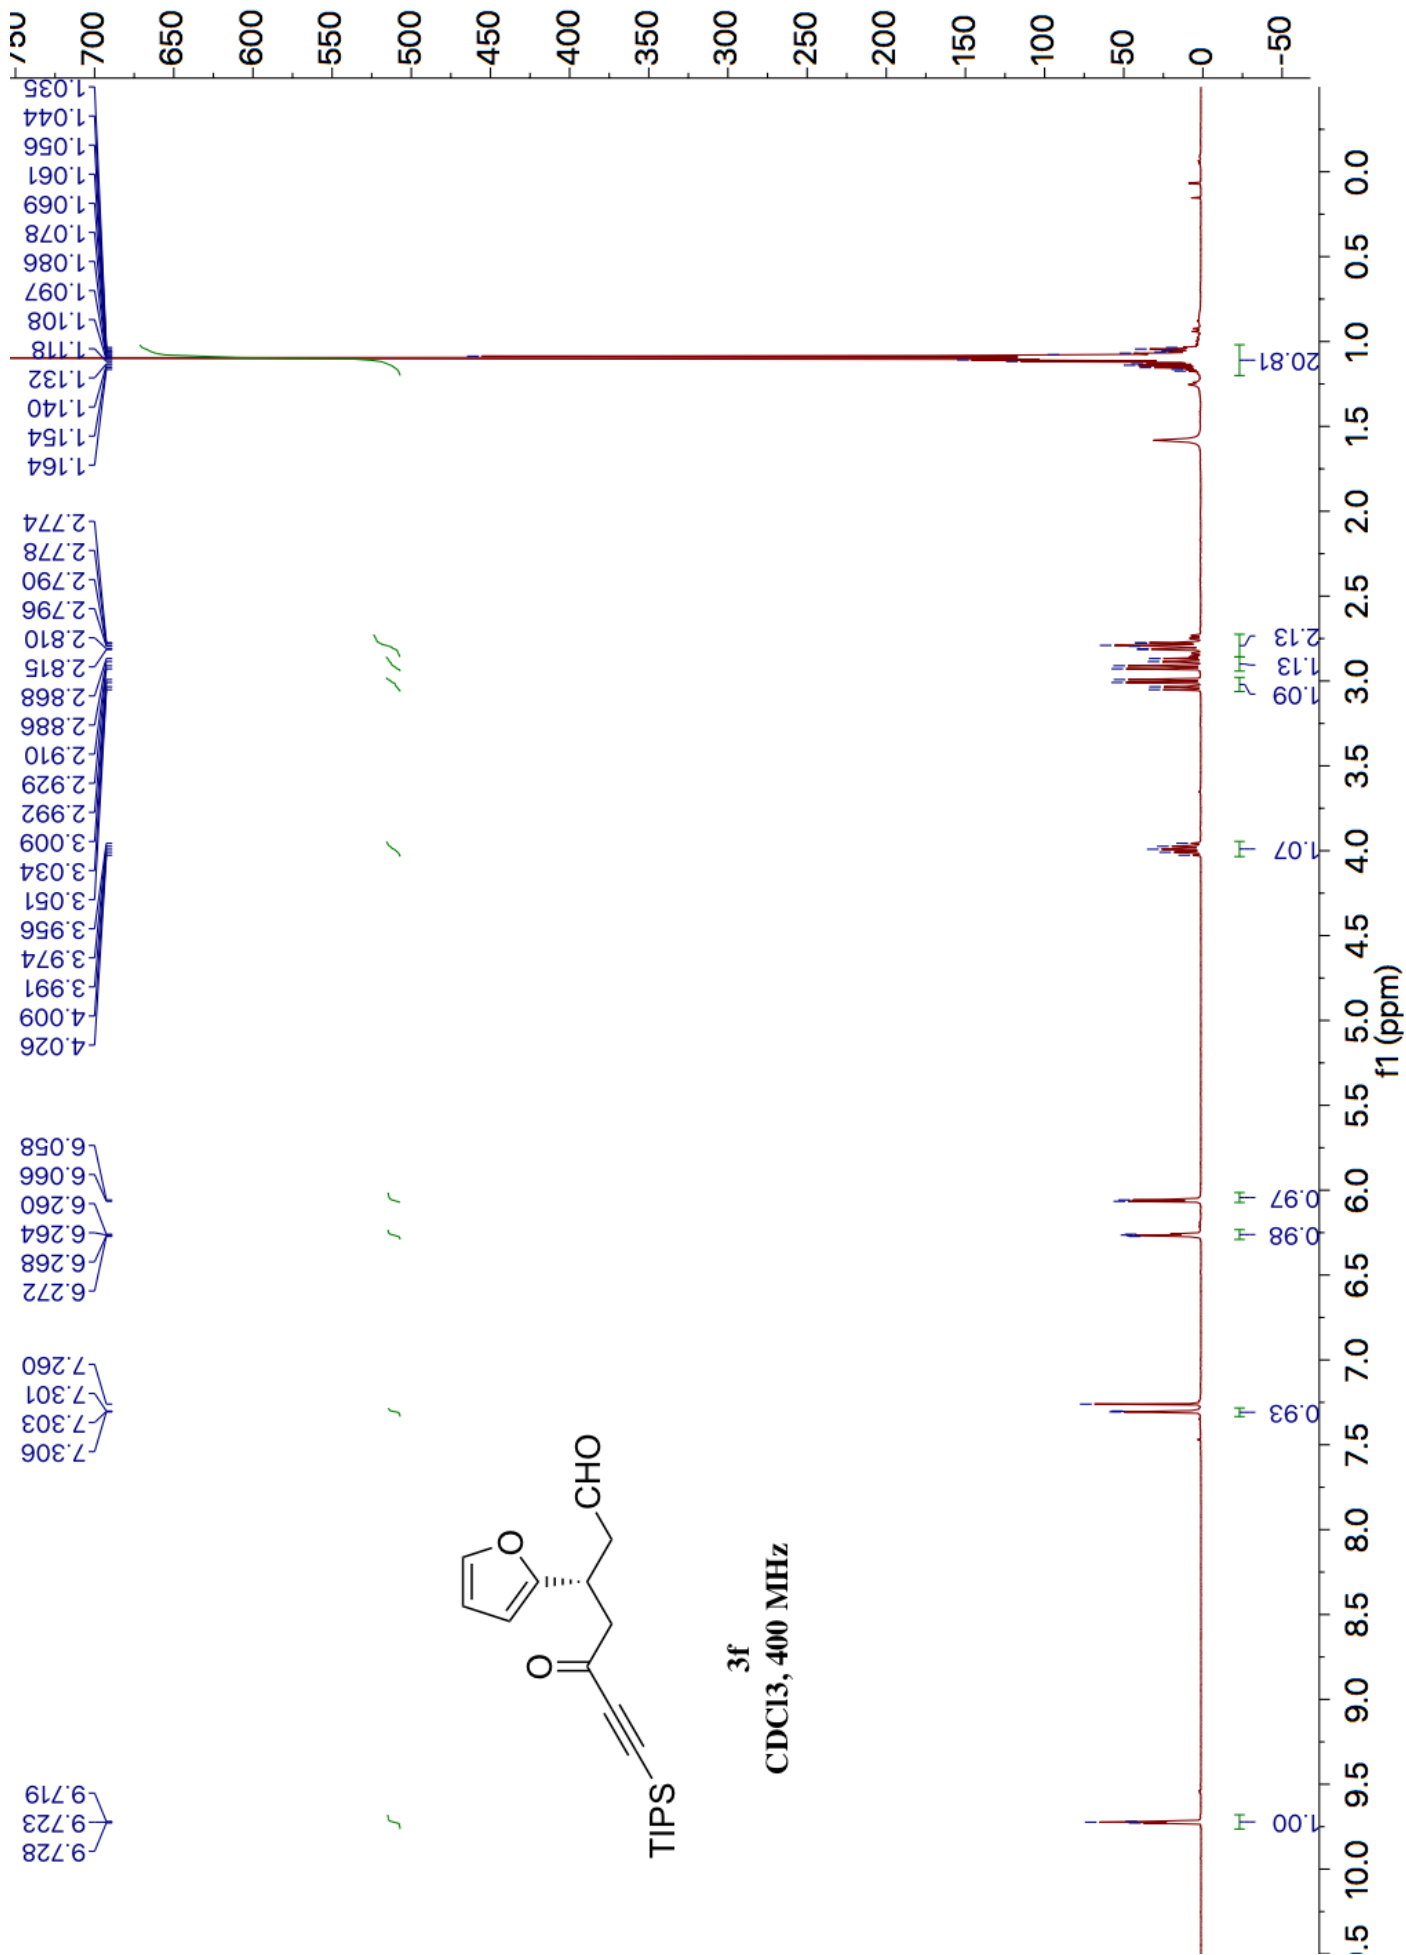

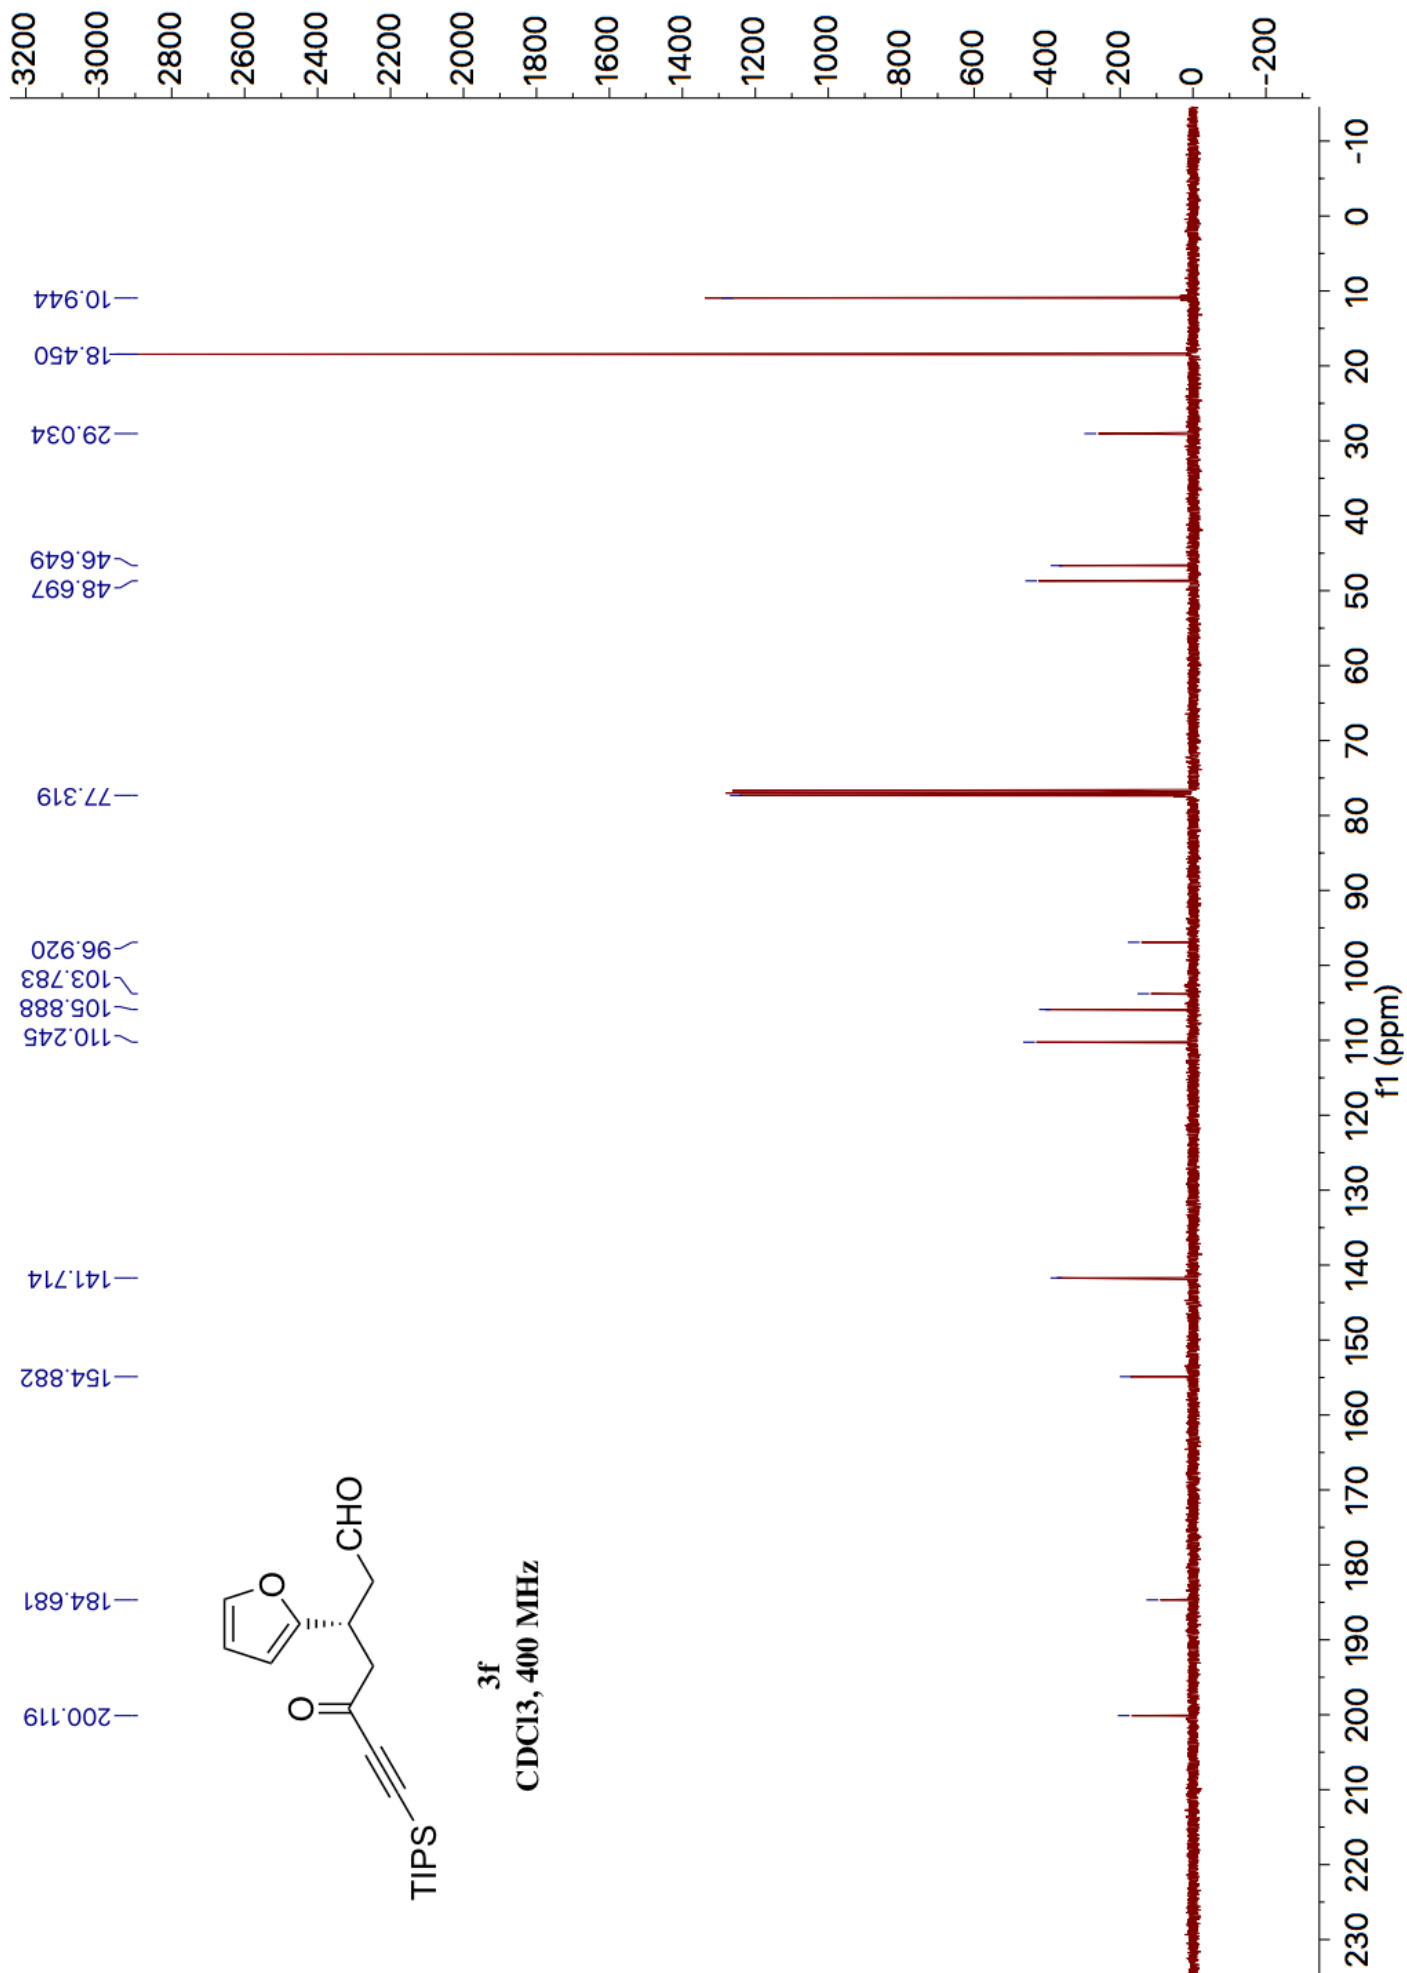

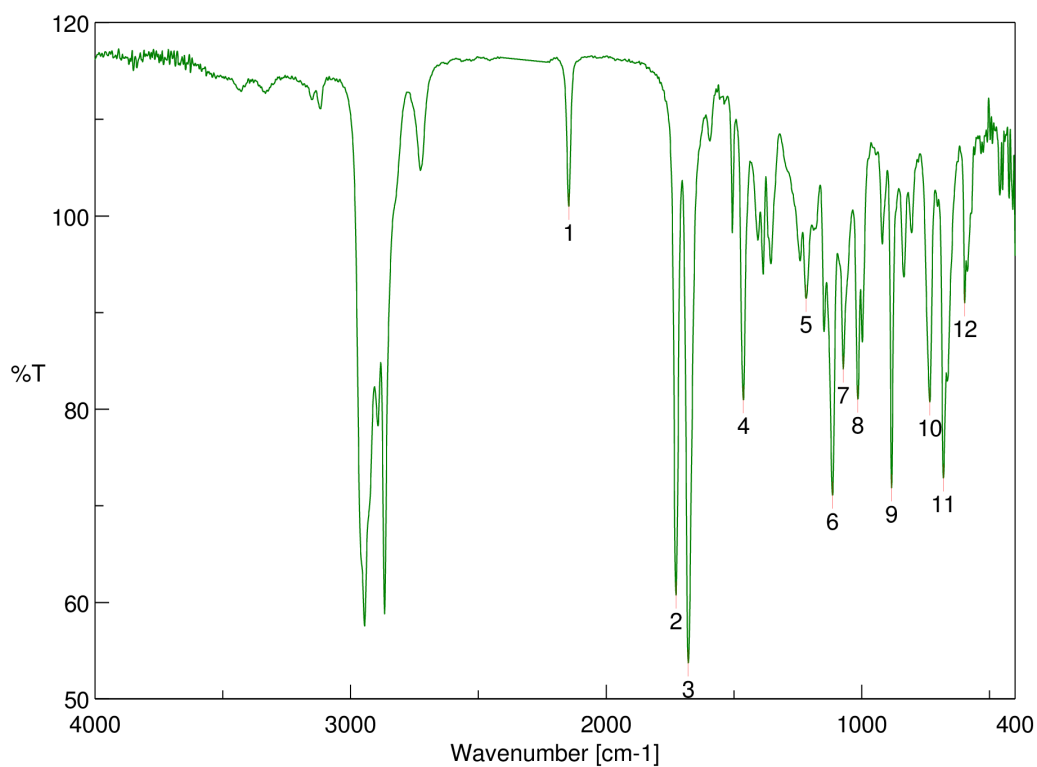

[ピーク検出結果]

| No. | 位置      | 強度      | No. | 位置      | 強度      |
|-----|---------|---------|-----|---------|---------|
| 1   | 2146.38 | 100.971 | 2   | 1726.94 | 60.748  |
| 3   | 1678.73 | 53.7382 | 4   | 1463.71 | 80.9579 |
| 5   | 1217.83 | 91.4577 | 6   | 1114.65 | 71.0891 |
| 7   | 1072.23 | 84.1533 | 8   | 1015.34 | 81.0283 |
| 9   | 883.238 | 71.8622 | 10  | 733.782 | 80.7281 |
| 11  | 680.749 | 72.8752 | 12  | 596.861 | 90.9865 |

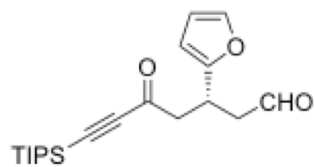

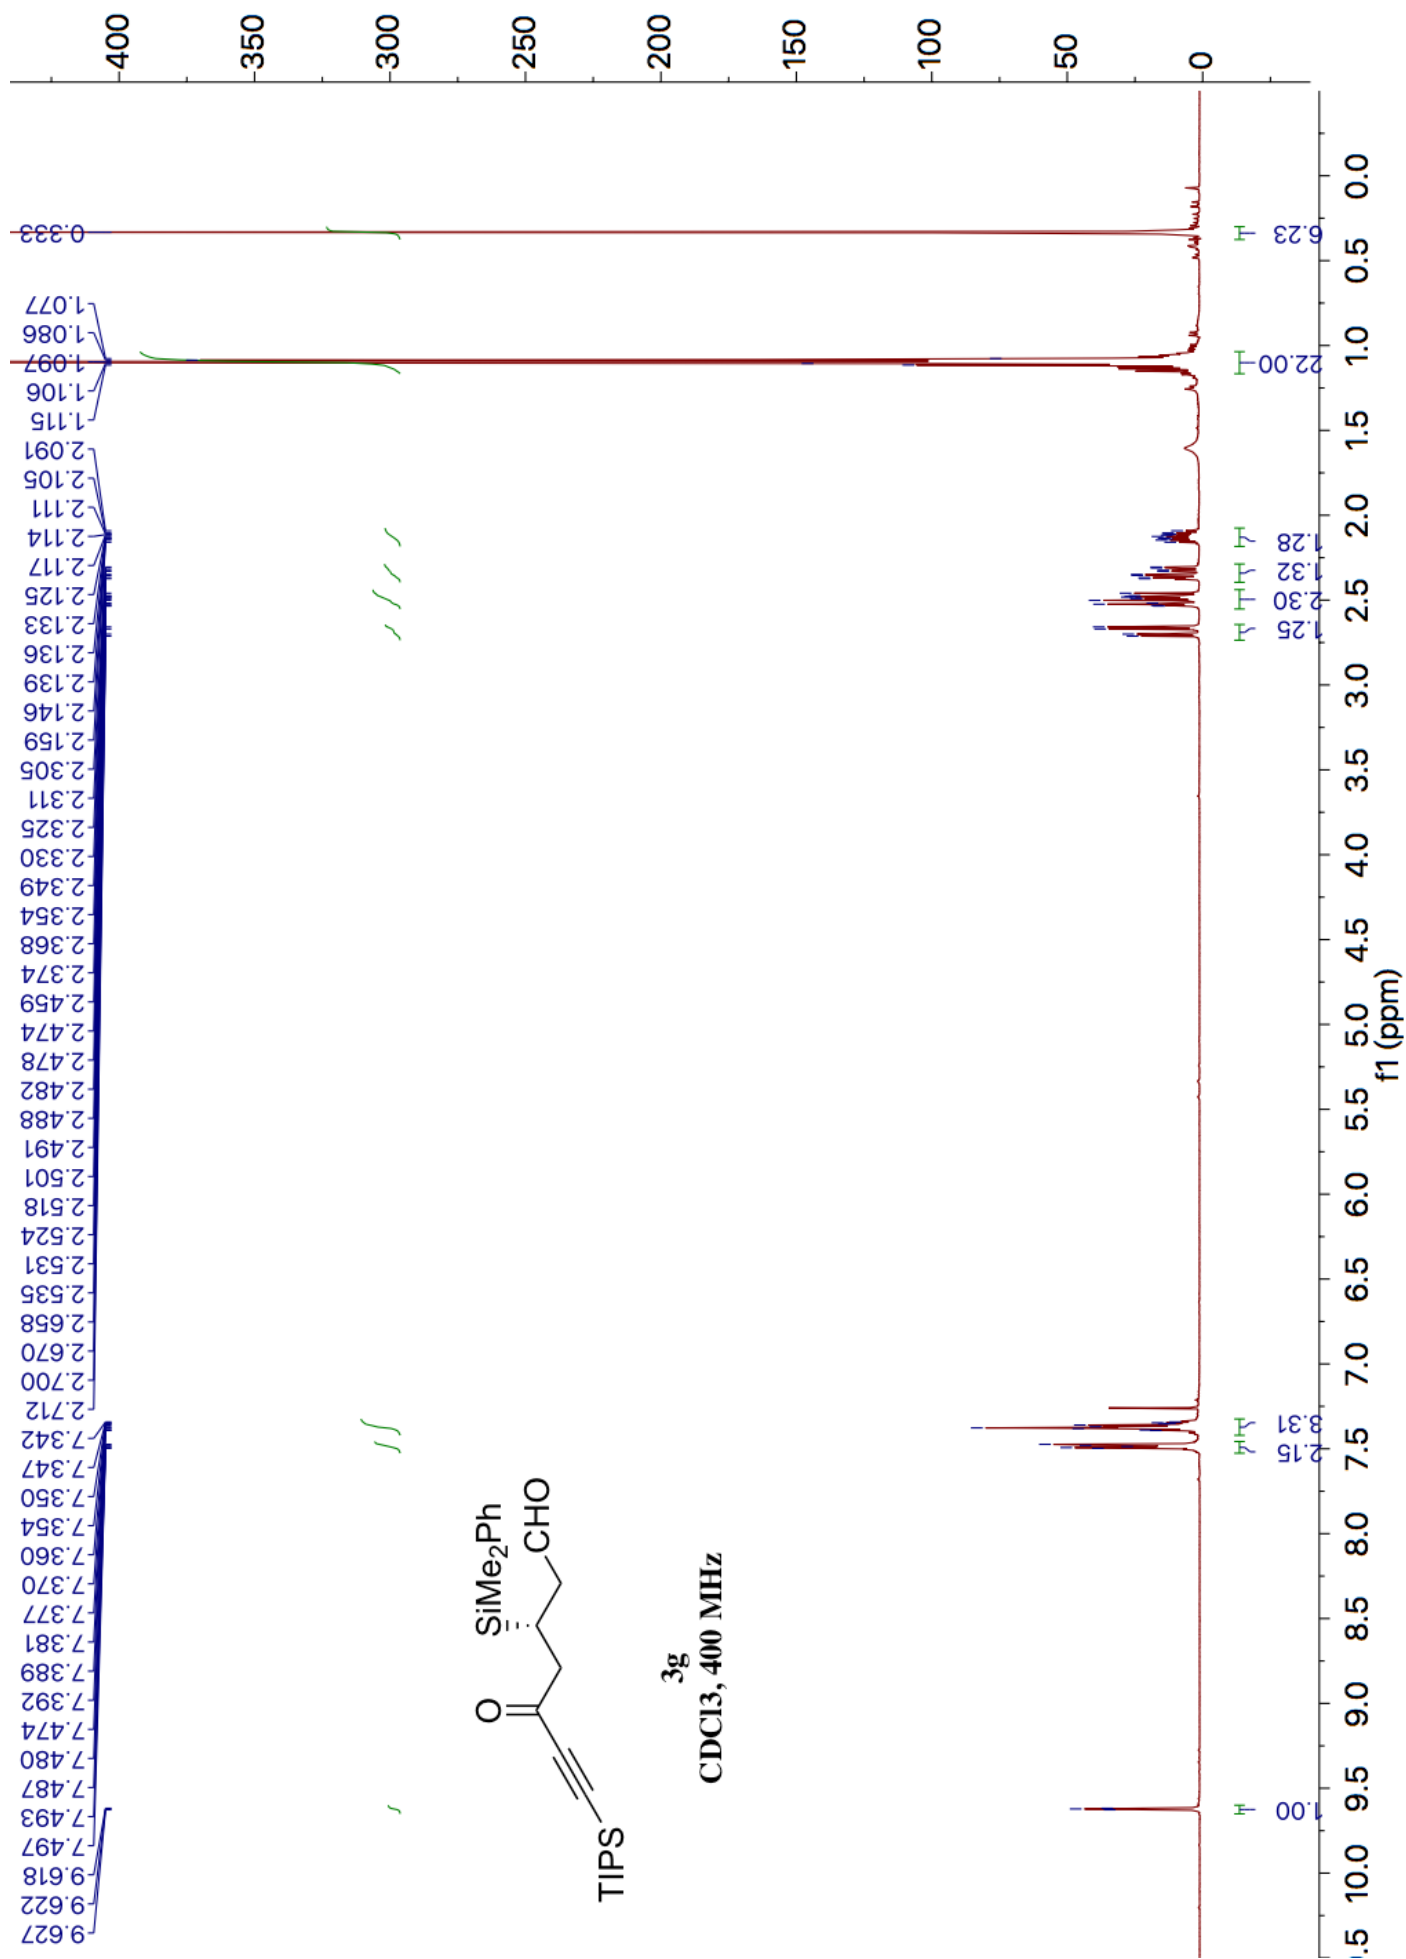

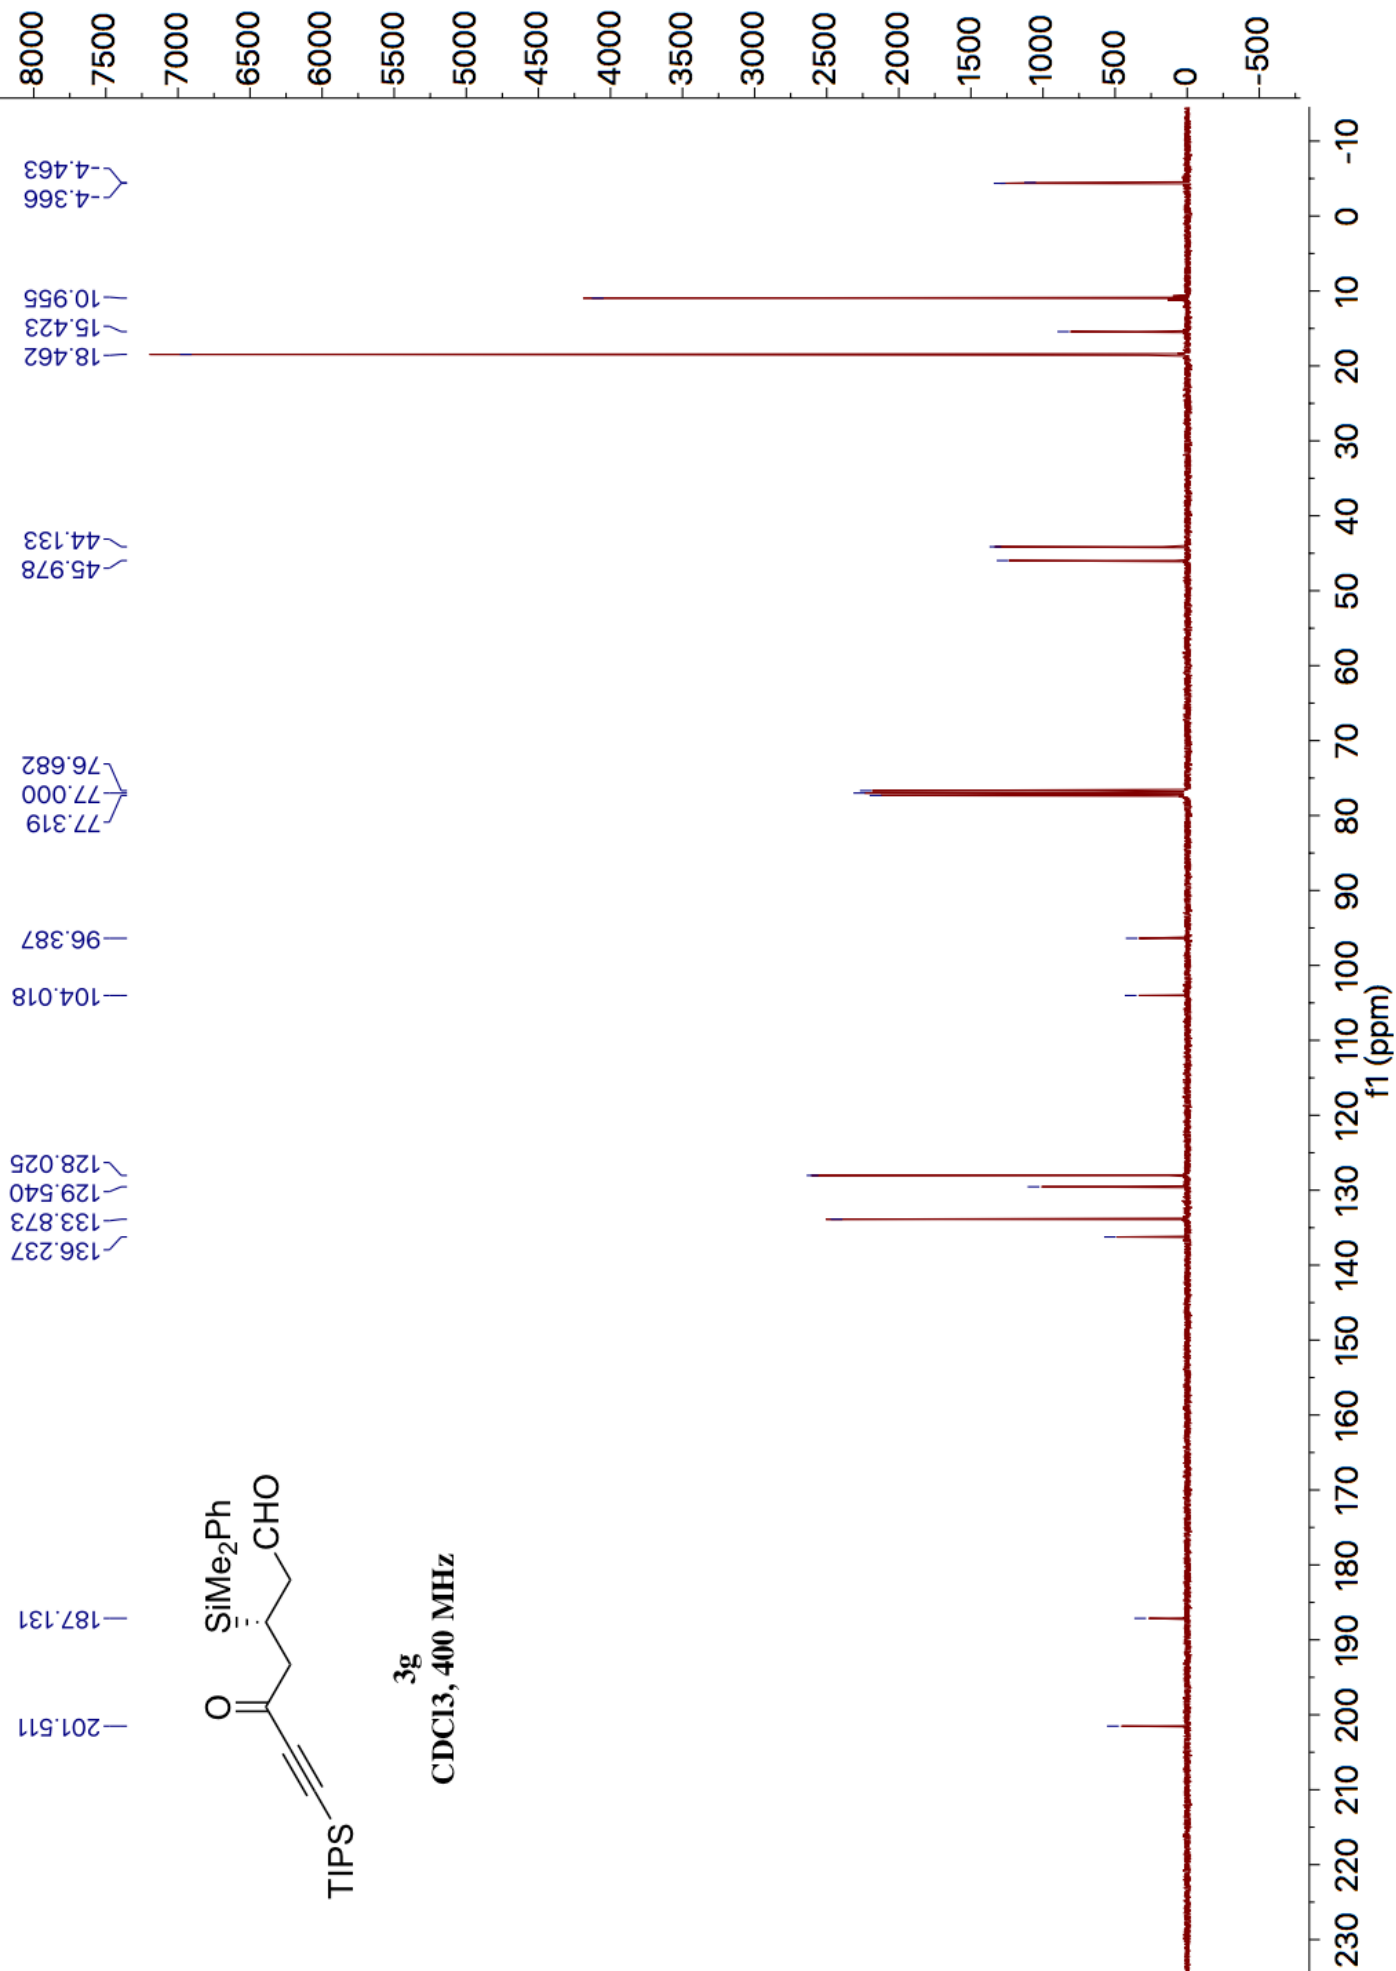

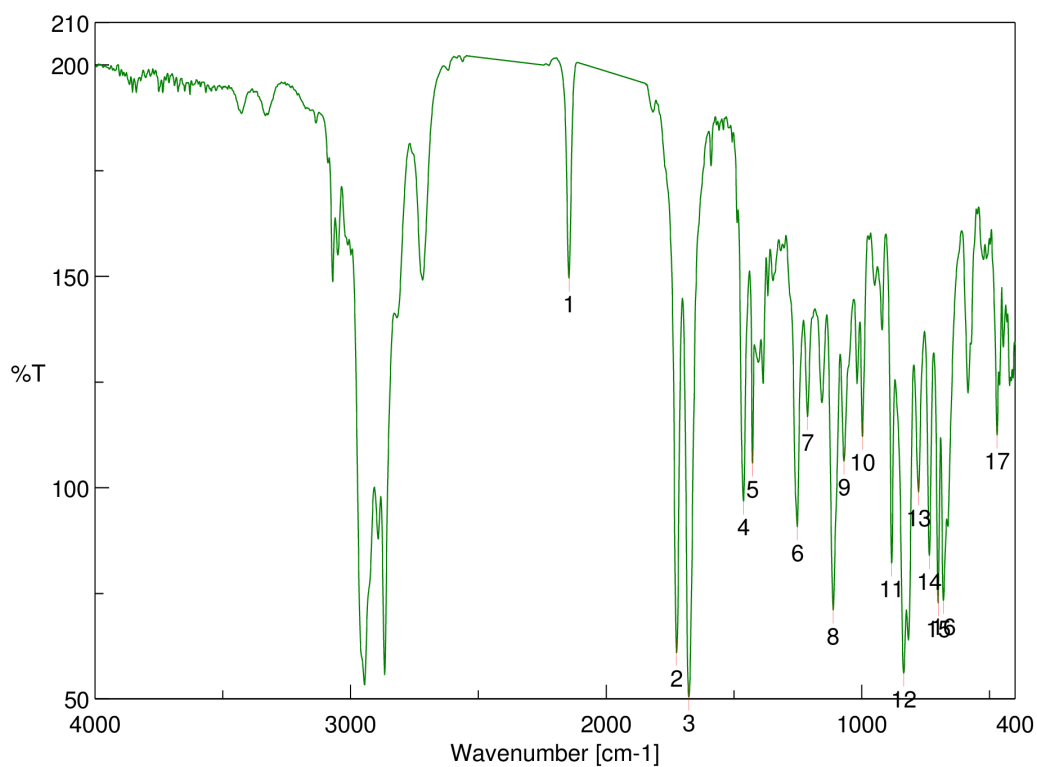

[ピーク検出結果]

| No. | 位置      | 強度      | No. | 位置      | 強度      |
|-----|---------|---------|-----|---------|---------|
| 1   | 2145.42 | 149.562 | 2   | 1725.01 | 60.9598 |
| 3   | 1676.8  | 50.4834 | 4   | 1462.74 | 96.8409 |
| 5   | 1427.07 | 105.773 | 6   | 1252.54 | 90.7543 |
| 7   | 1212.04 | 116.774 | 8   | 1111.76 | 71.0225 |
| 9   | 1069.33 | 106.275 | 10  | 997.017 | 112.131 |
| 11  | 883.238 | 82.1869 | 12  | 835.99  | 56.1477 |
| 13  | 778.136 | 98.9593 | 14  | 735.71  | 83.9728 |
| 15  | 700.998 | 72.7094 | 16  | 680.749 | 73.2955 |
| 17  | 470.546 | 112.448 |     |         |         |

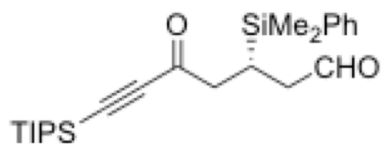

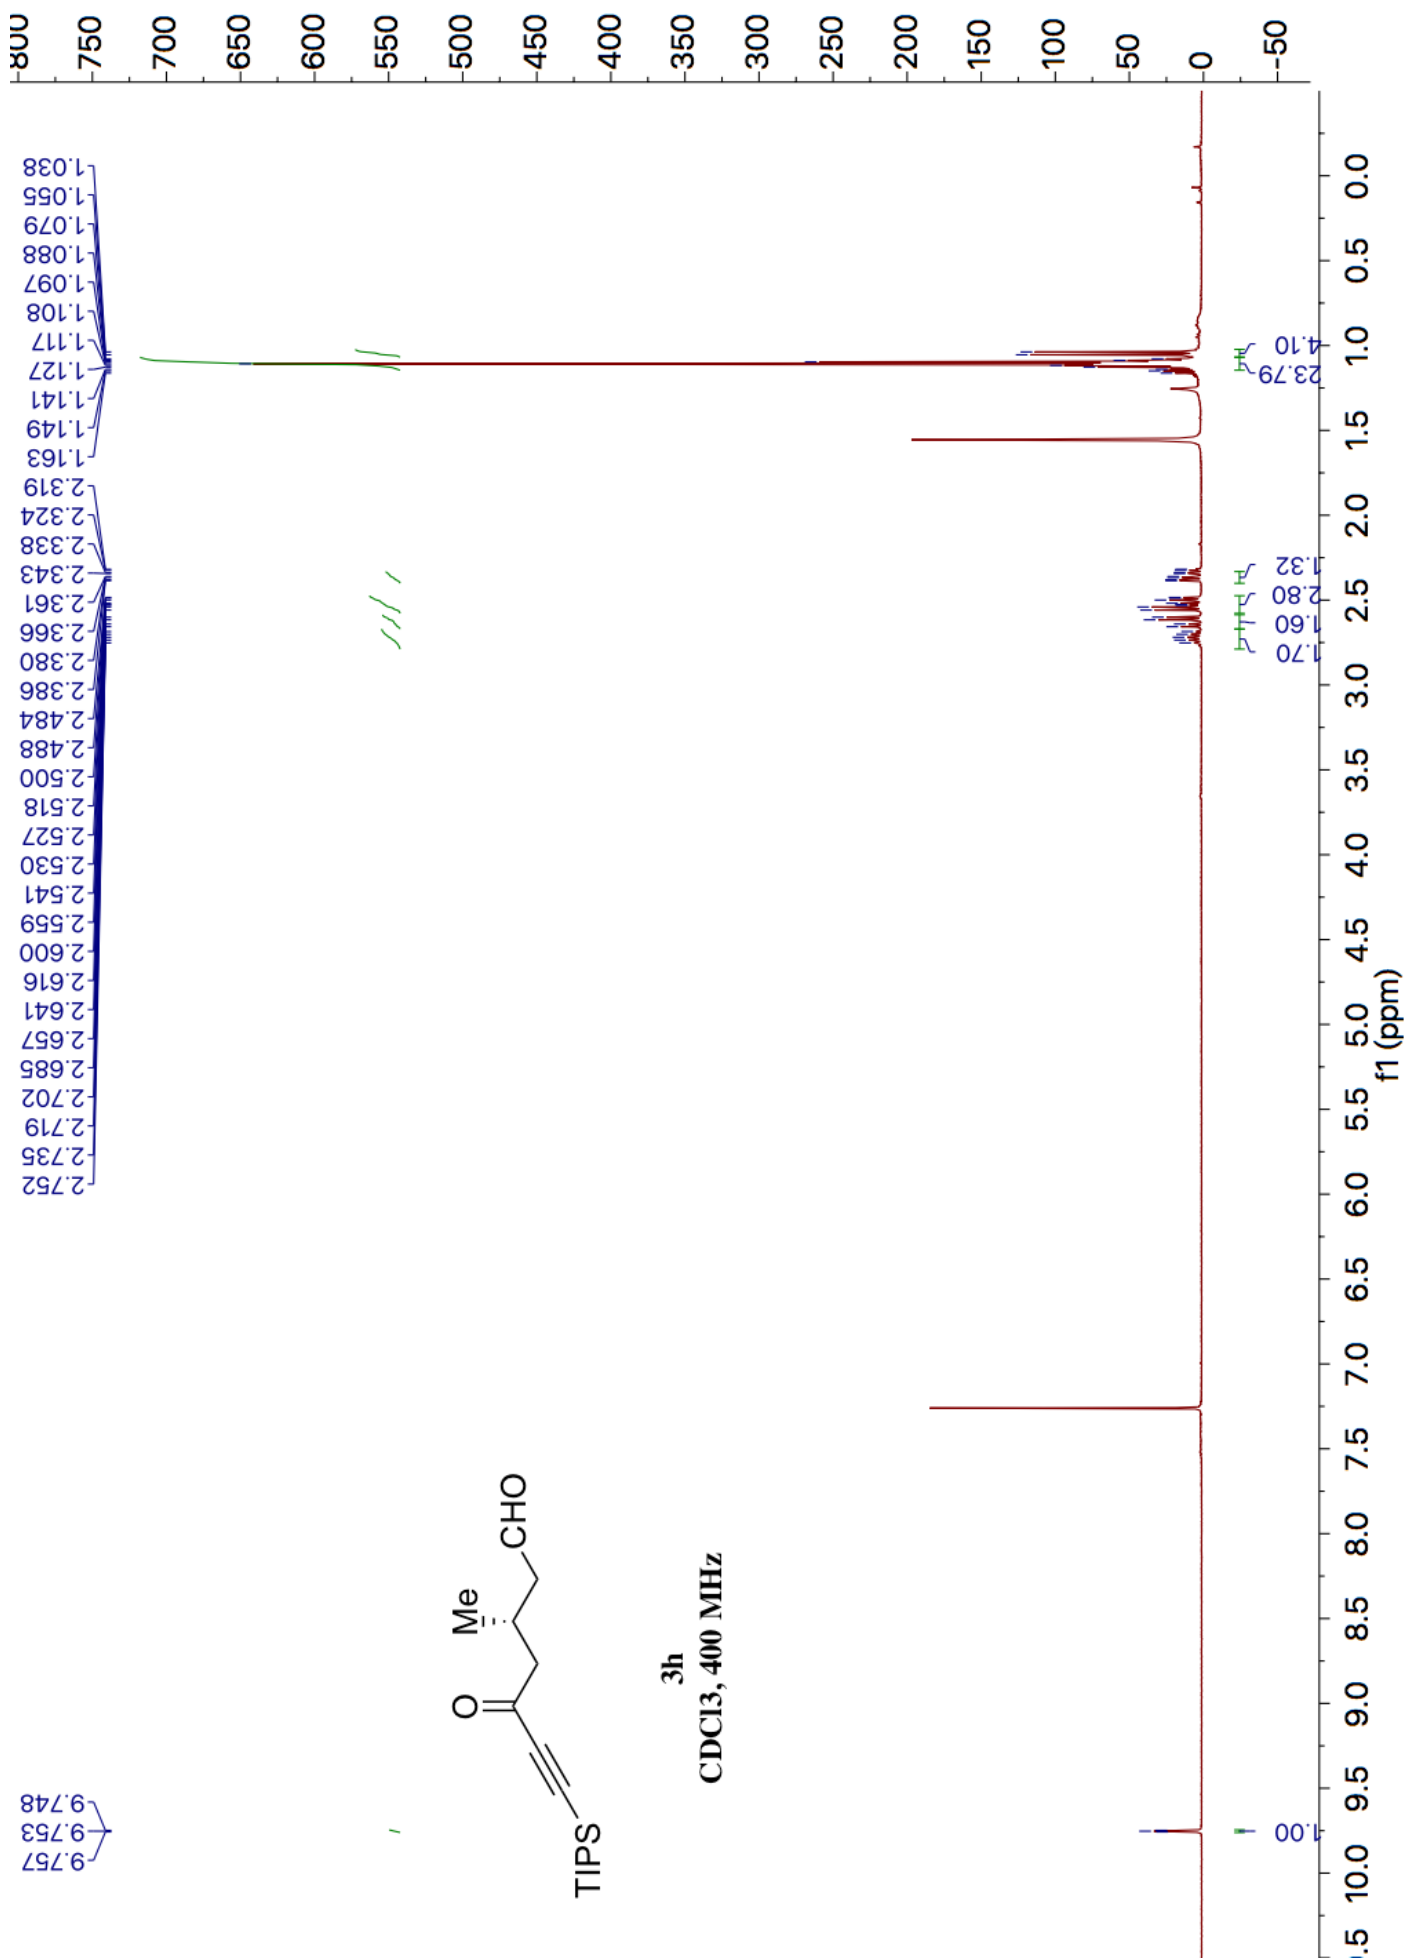

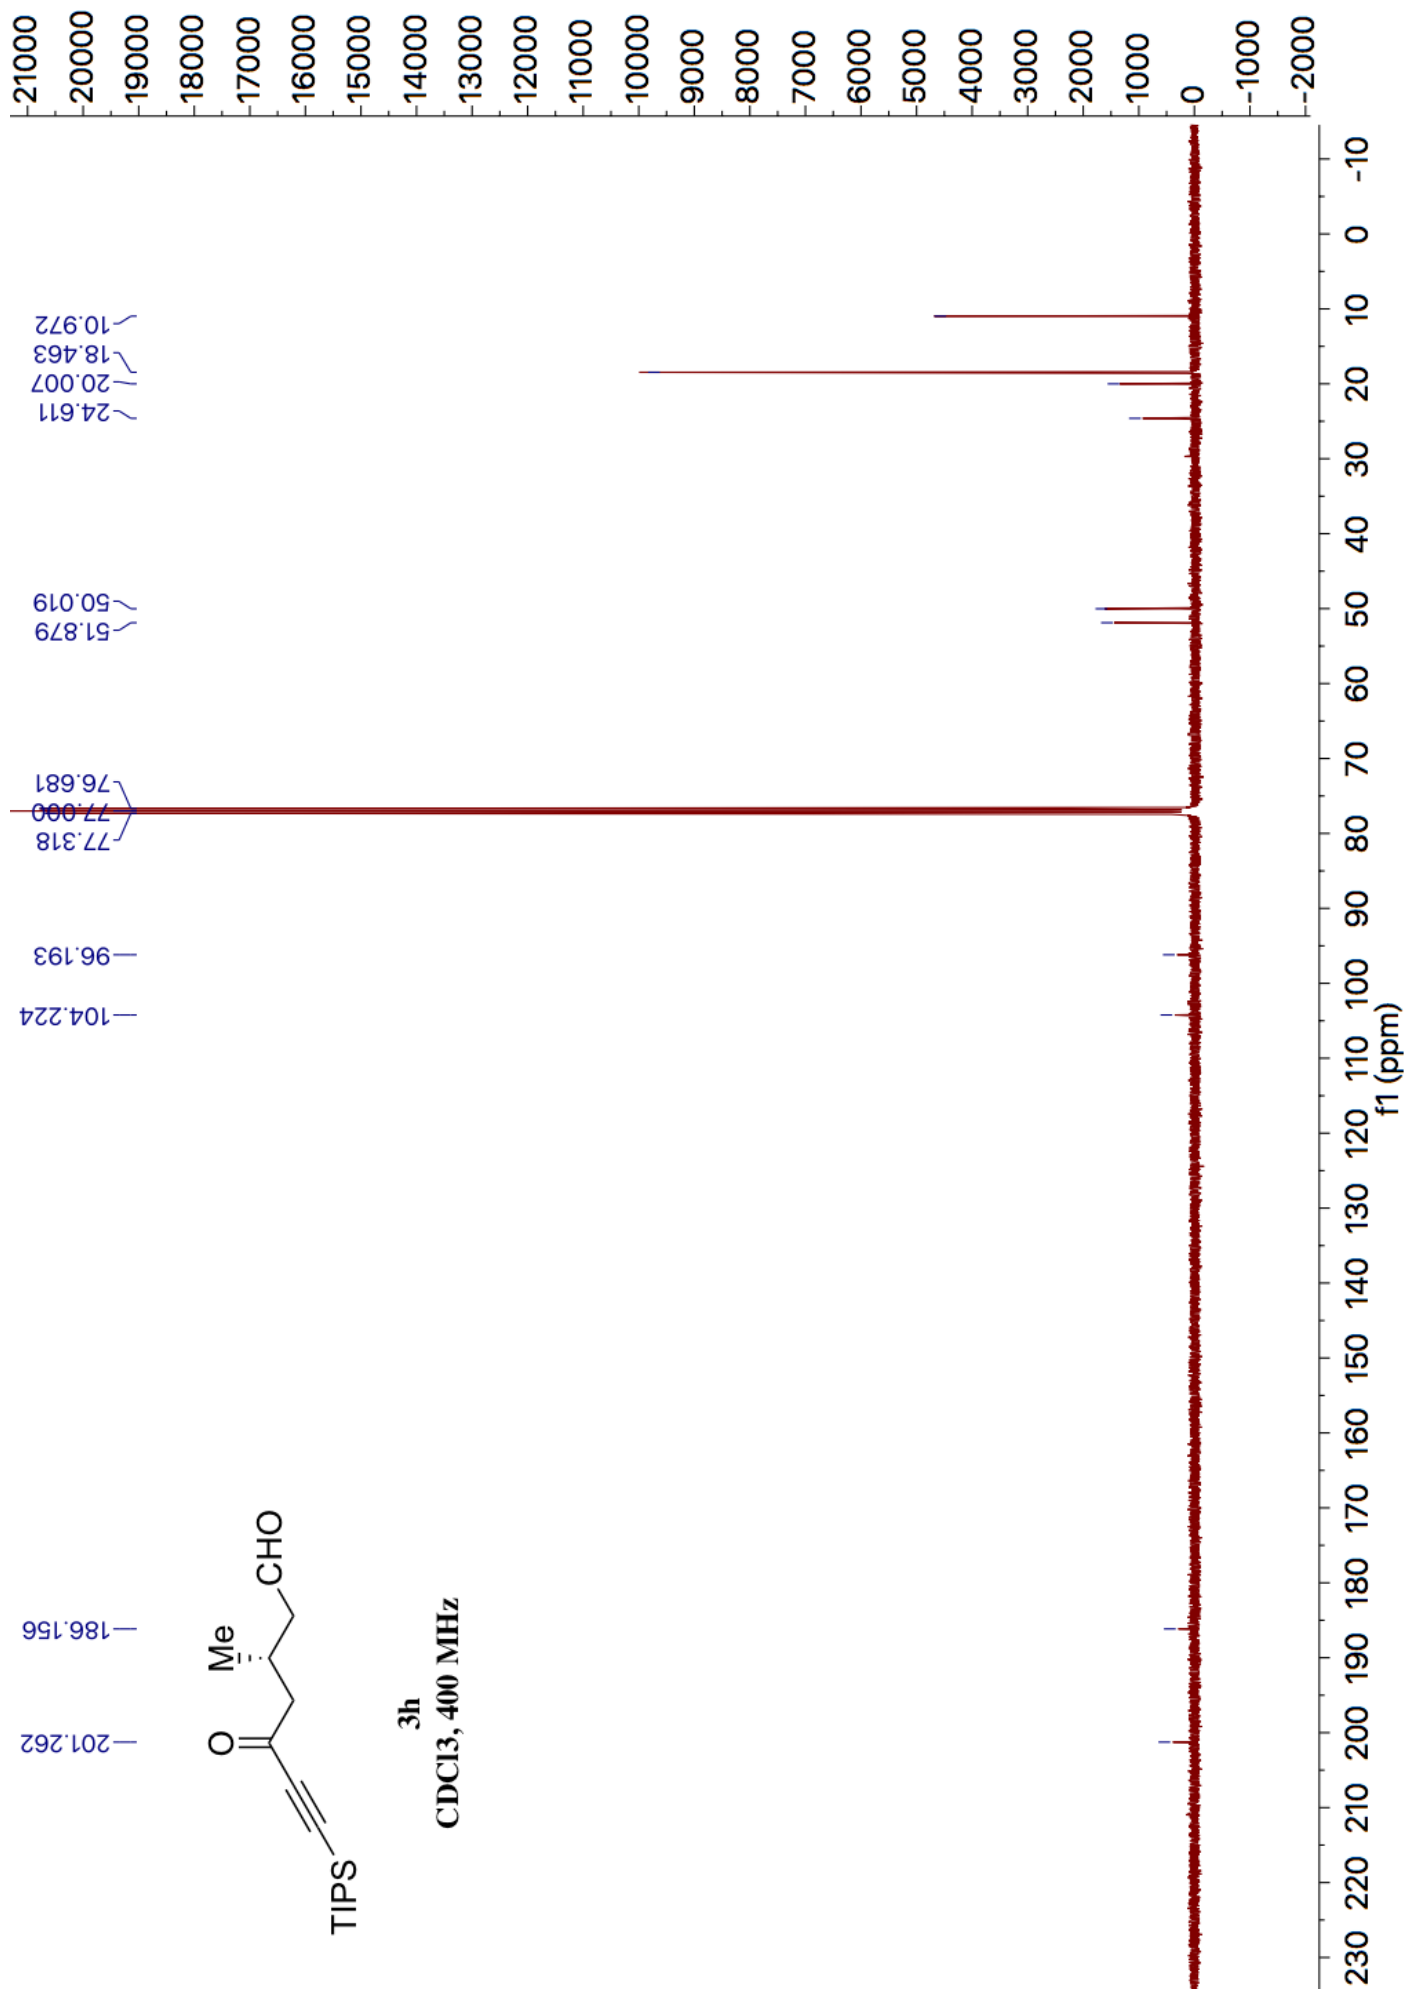



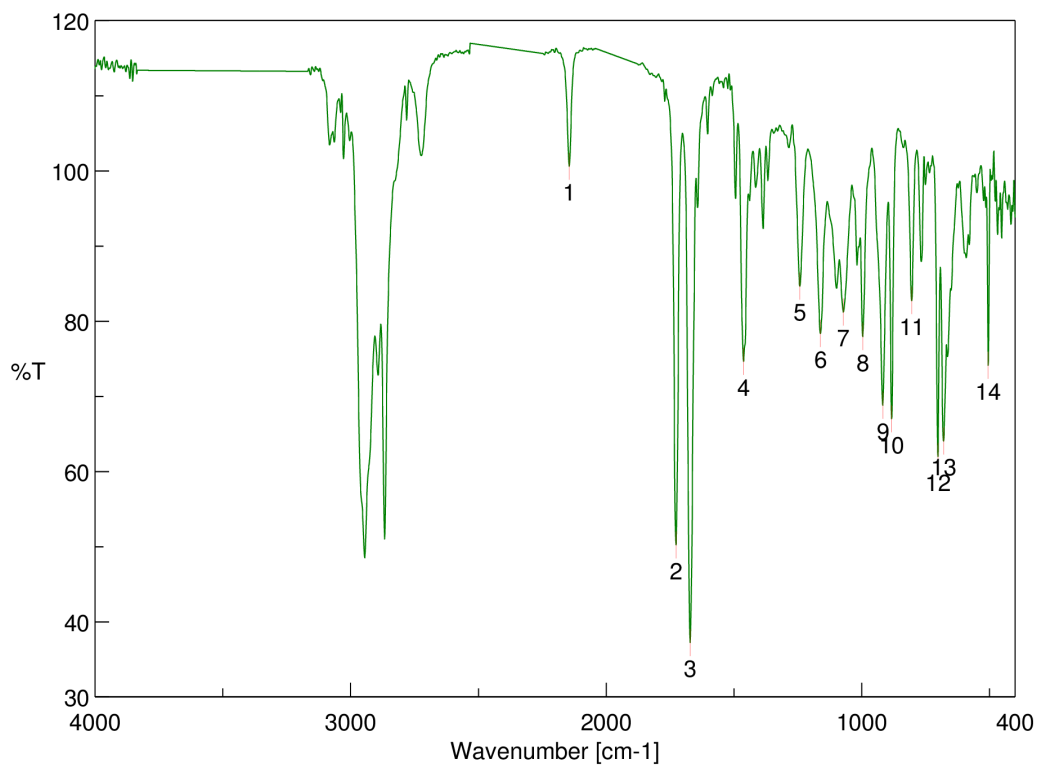

[ピーク検出結果]

| No. | 位置      | 強度      | No. | 位置      | 強度      |
|-----|---------|---------|-----|---------|---------|
| 1   | 2144.46 | 100.583 | 2   | 1726.94 | 50.2365 |
| 3   | 1671.02 | 37.2193 | 4   | 1462.74 | 74.643  |
| 5   | 1241.93 | 84.6359 | 6   | 1161.9  | 78.3419 |
| 7   | 1072.23 | 81.215  | 8   | 996.053 | 77.9284 |
| 9   | 917.95  | 68.8086 | 10  | 883.238 | 67.0089 |
| 11  | 804.171 | 82.7392 | 12  | 701.962 | 61.976  |
| 13  | 679.785 | 64.0461 | 14  | 505.258 | 74.1117 |

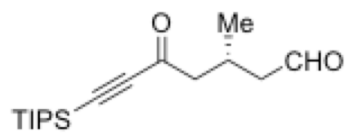



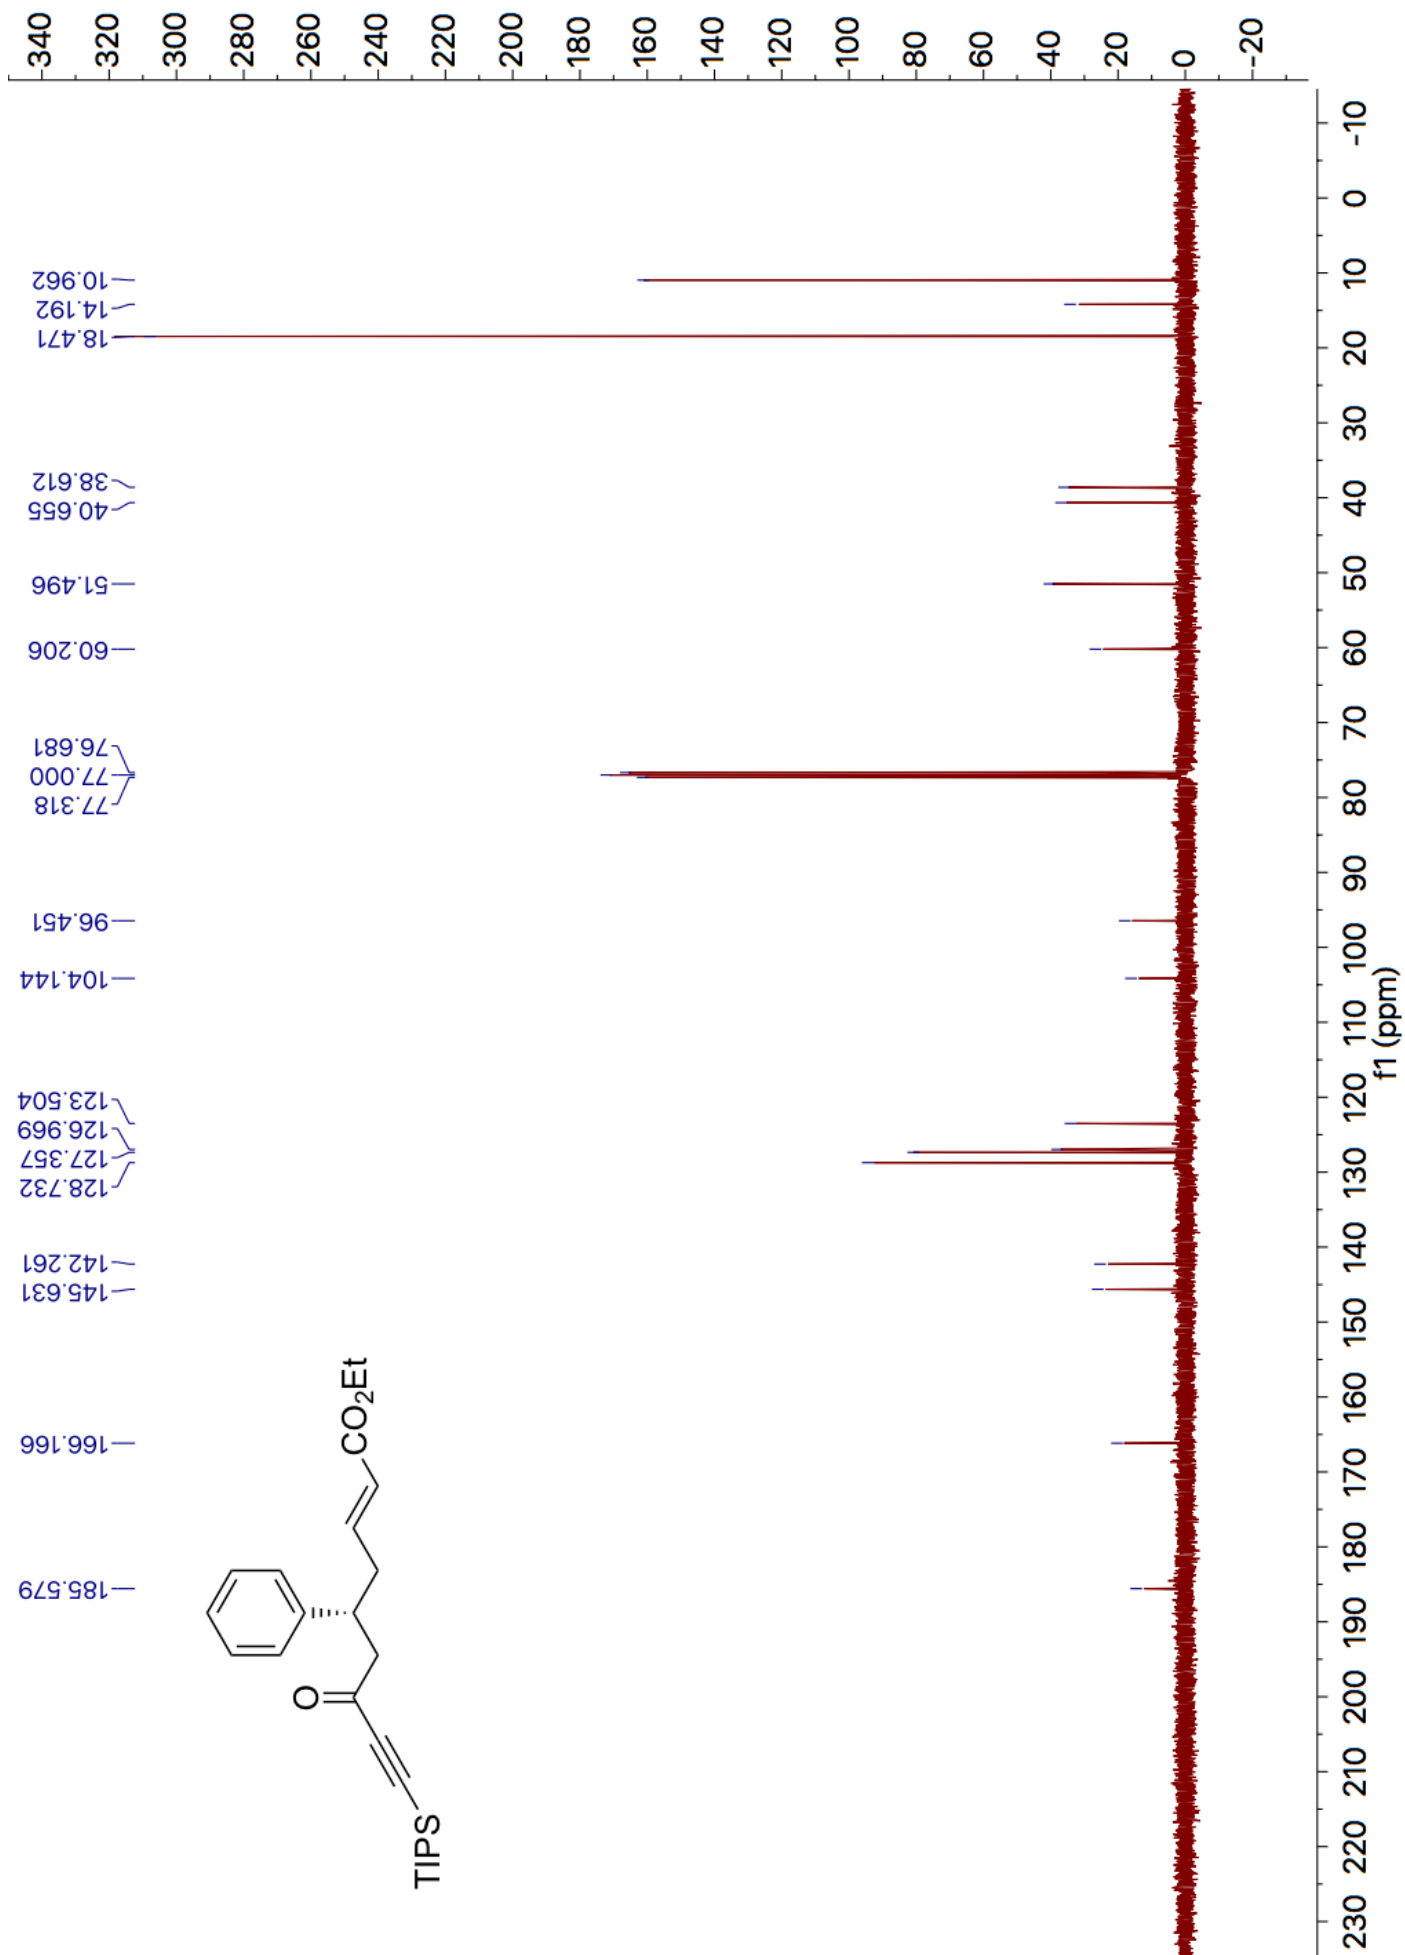

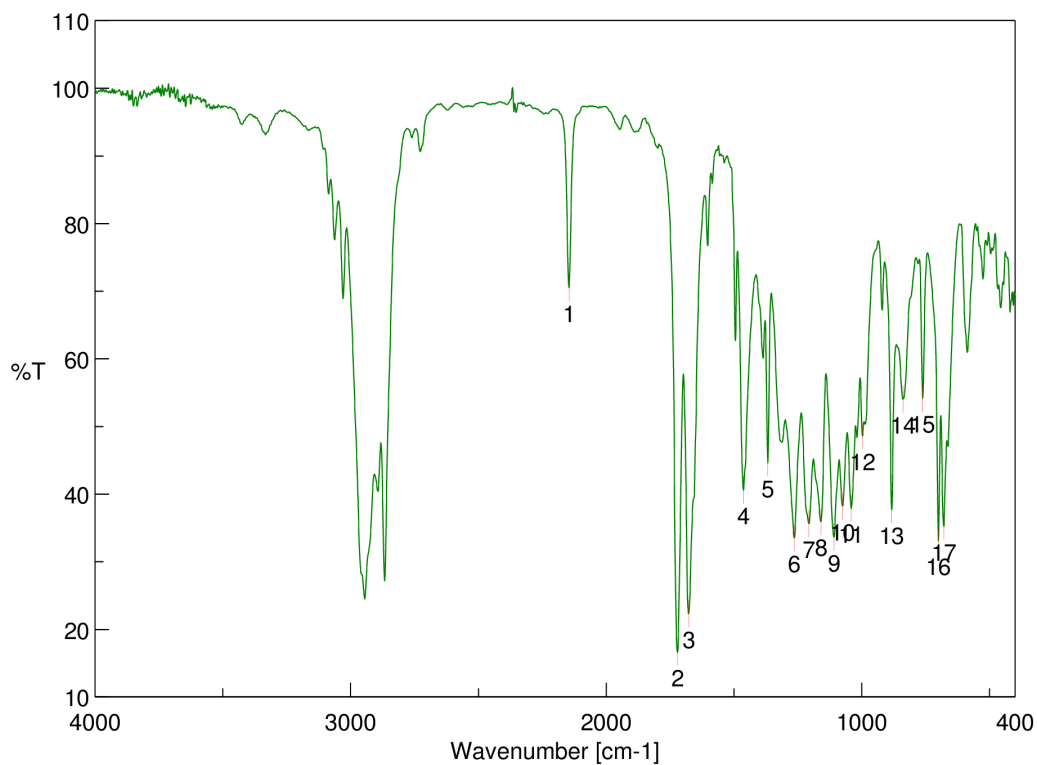

[ ピーク検出結果 ]

| No. | 位置      | 強度      | No. | 位置      | 強度      |
|-----|---------|---------|-----|---------|---------|
| 1   | 2145.42 | 70.4999 | 2   | 1721.16 | 16.6109 |
| 3   | 1676.8  | 22.3269 | 4   | 1462.74 | 40.5704 |
| 5   | 1367.28 | 44.627  | 6   | 1264.11 | 33.5003 |
| 7   | 1207.22 | 35.6323 | 8   | 1159.97 | 35.9157 |
| 9   | 1108.87 | 33.6187 | 10  | 1075.12 | 38.2352 |
| 11  | 1041.37 | 37.8997 | 12  | 997.017 | 48.5932 |
| 13  | 883.238 | 37.7165 | 14  | 837.919 | 54.0177 |
| 15  | 761.744 | 54.1649 | 16  | 700.034 | 33.1012 |
| 17  | 678.82  | 35.2257 |     |         |         |

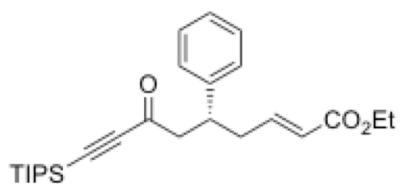

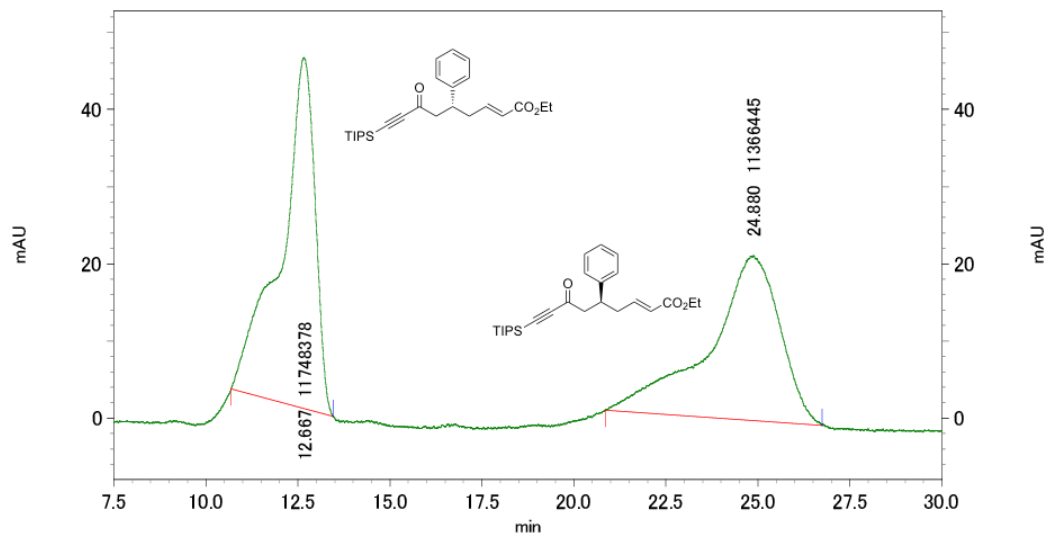

Result  
1: 238 nm, 4 nm結果

| Pk #  | Retention time / min | Integration / % |
|-------|----------------------|-----------------|
| 1     | 12.667               | 50.826          |
| 2     | 24.880               | 49.174          |
| トータル  |                      | 100.000         |
| Total |                      |                 |

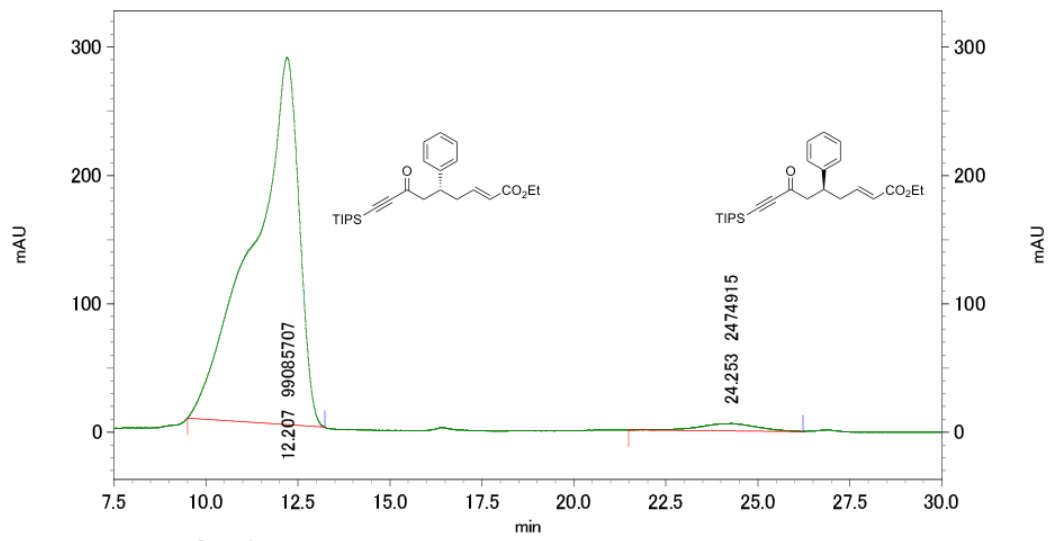

Result  
1: 238 nm, 4 nm 結果

| Pk #  | Retention time / min | Integration / % |
|-------|----------------------|-----------------|
| 1     | 12.207               | 97.563          |
| 2     | 24.253               | 2.437           |
| トータル  |                      | 100.000         |
| Total |                      |                 |

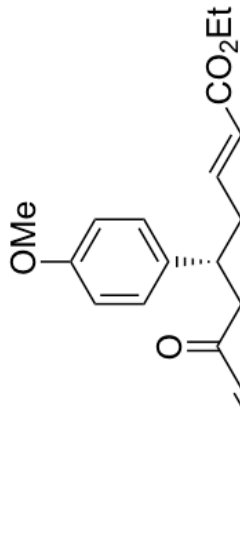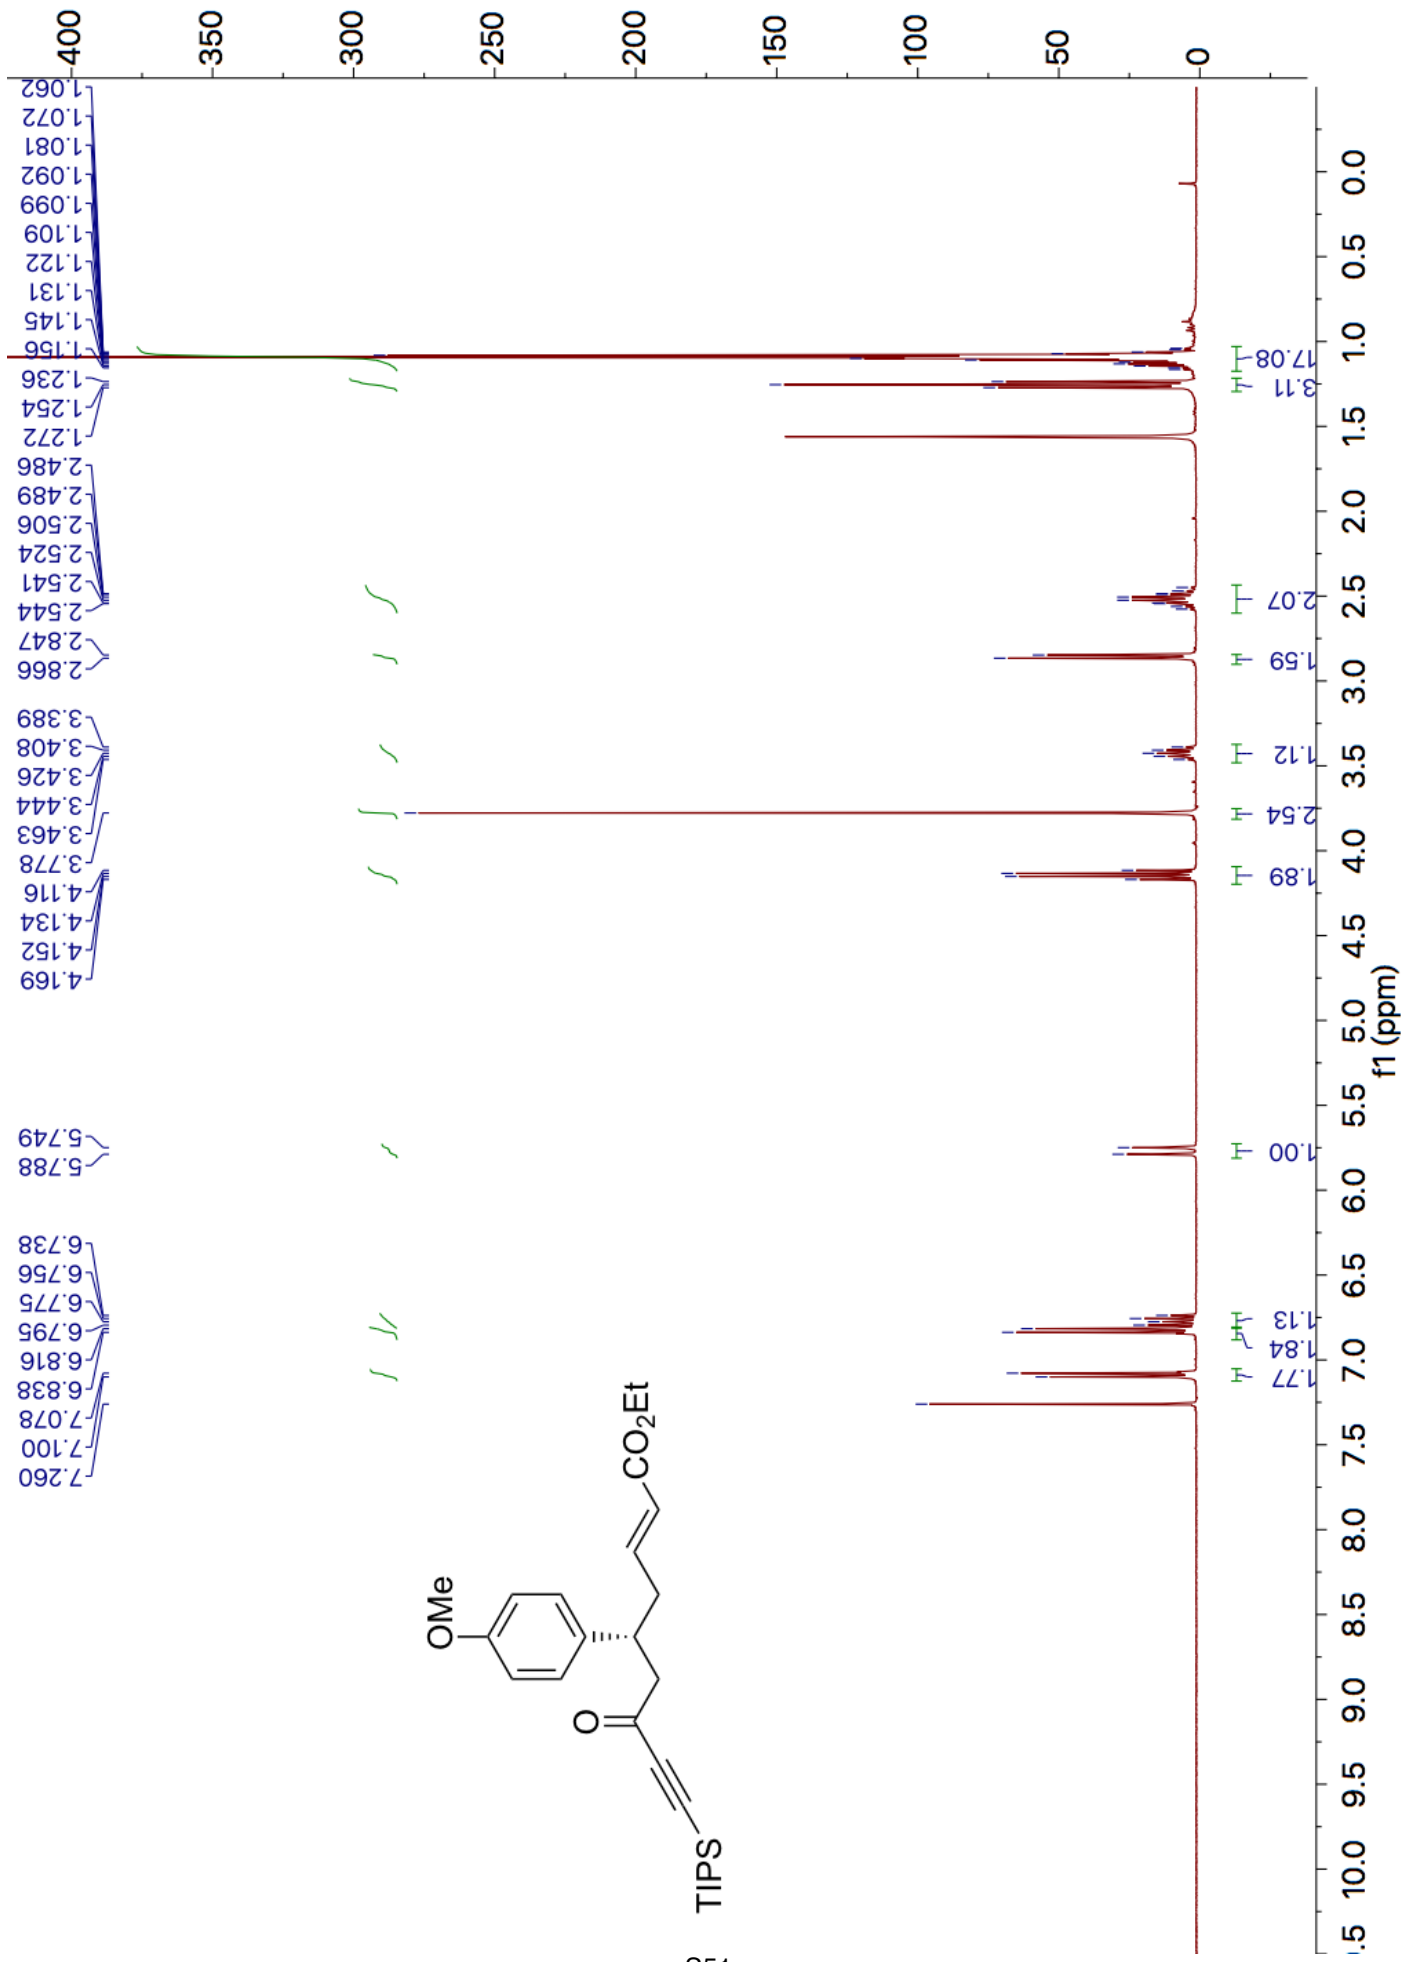

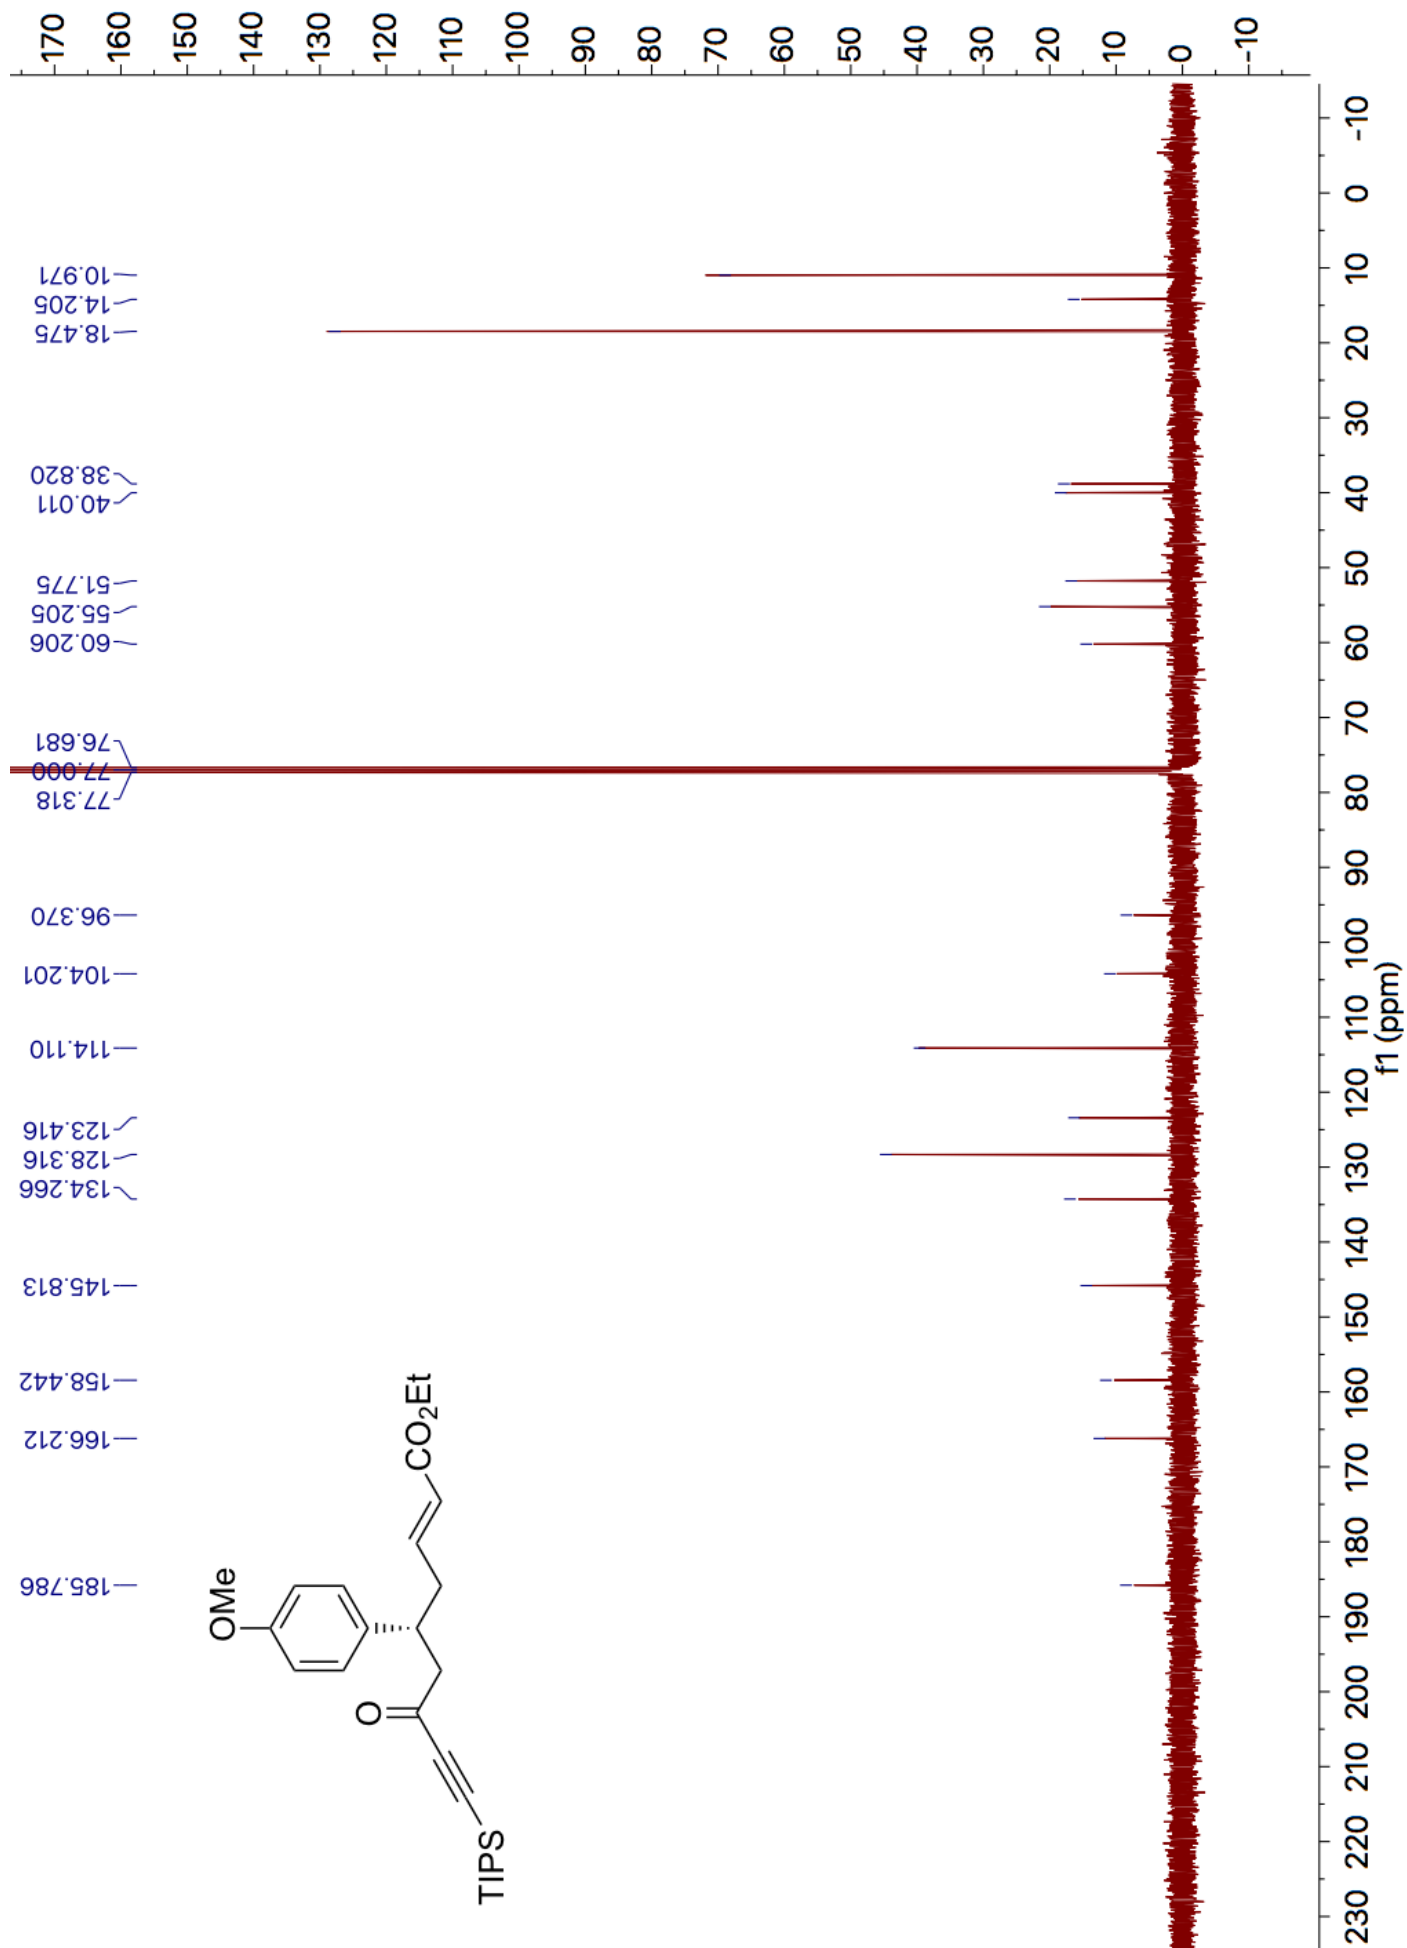



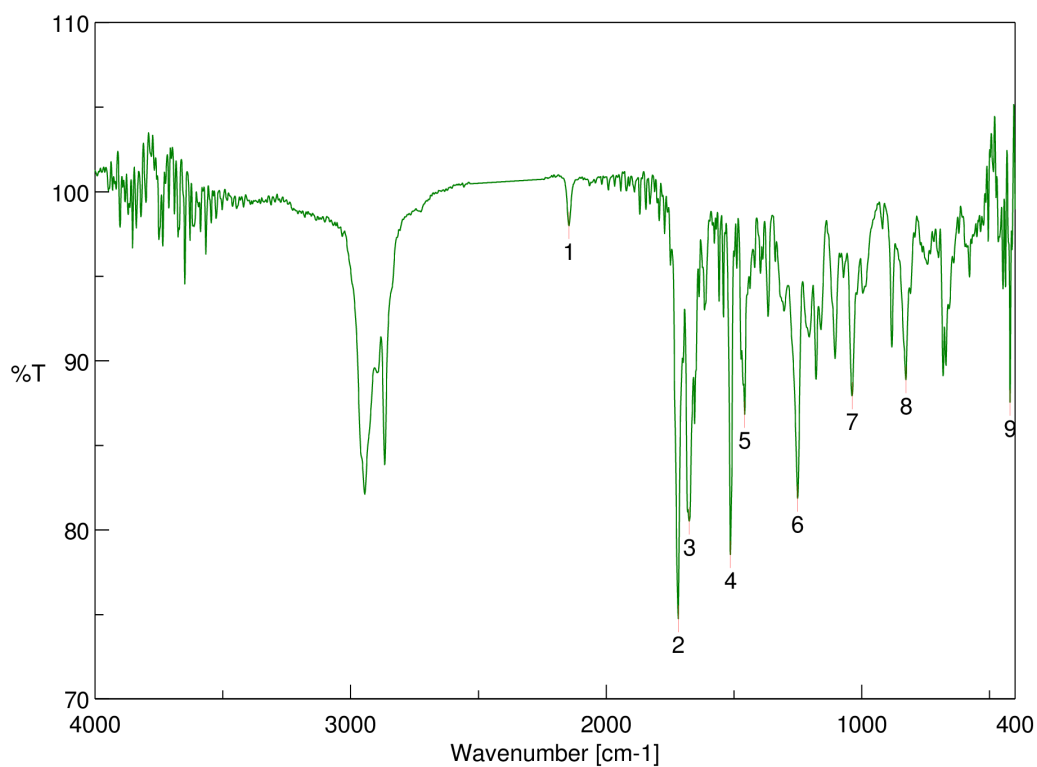

[ピーク検出結果]

| No. | 位置      | 強度      | No. | 位置      | 強度      |
|-----|---------|---------|-----|---------|---------|
| 1   | 2146.38 | 97.9915 | 2   | 1718.26 | 74.7363 |
| 3   | 1674.87 | 80.5174 | 4   | 1513.85 | 78.543  |
| 5   | 1457.92 | 86.8269 | 6   | 1250.61 | 81.8696 |
| 7   | 1037.52 | 87.923  | 8   | 827.312 | 88.8837 |
| 9   | 419.442 | 87.5454 |     |         |         |

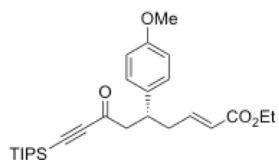

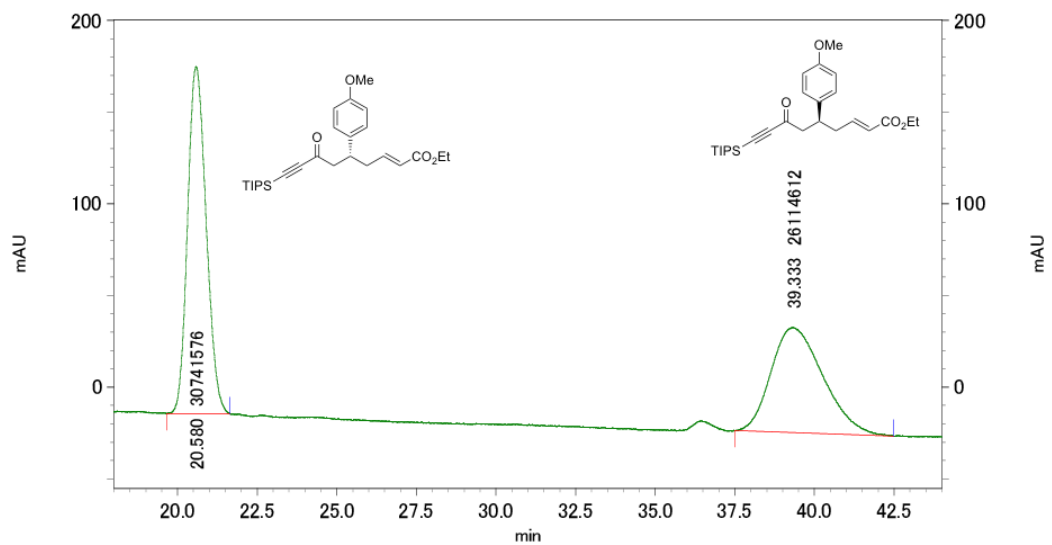

Result  
1: 213 nm, 4 nm結果

| Pk #  | Retention time / min | Integration / % |
|-------|----------------------|-----------------|
| 1     | 20.580               | 54.069          |
| 2     | 39.333               | 45.931          |
| トータル  |                      | 100.000         |
| Total |                      |                 |

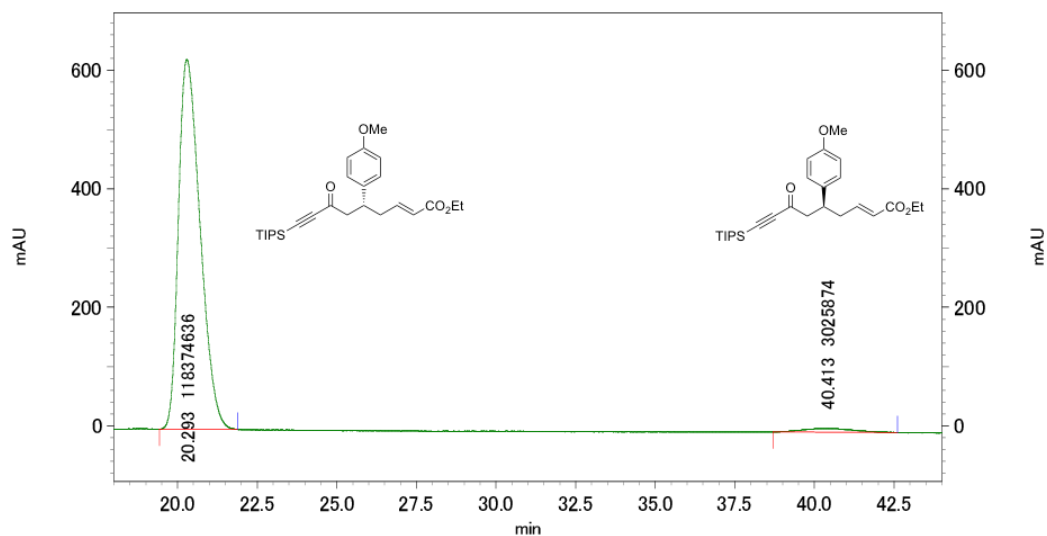

Result  
1: 213 nm, 4 nm結果

| Pk #  | Retention time / min | Integration / % |
|-------|----------------------|-----------------|
| 1     | 20.293               | 97.508          |
| 2     | 40.413               | 2.492           |
| トータル  |                      | 100.000         |
| Total |                      |                 |

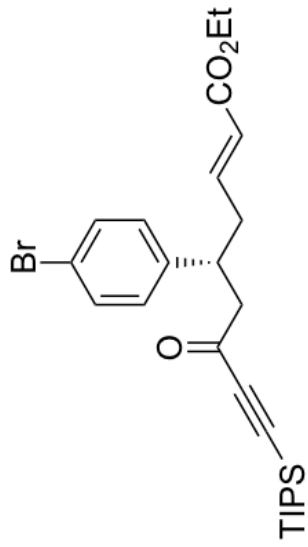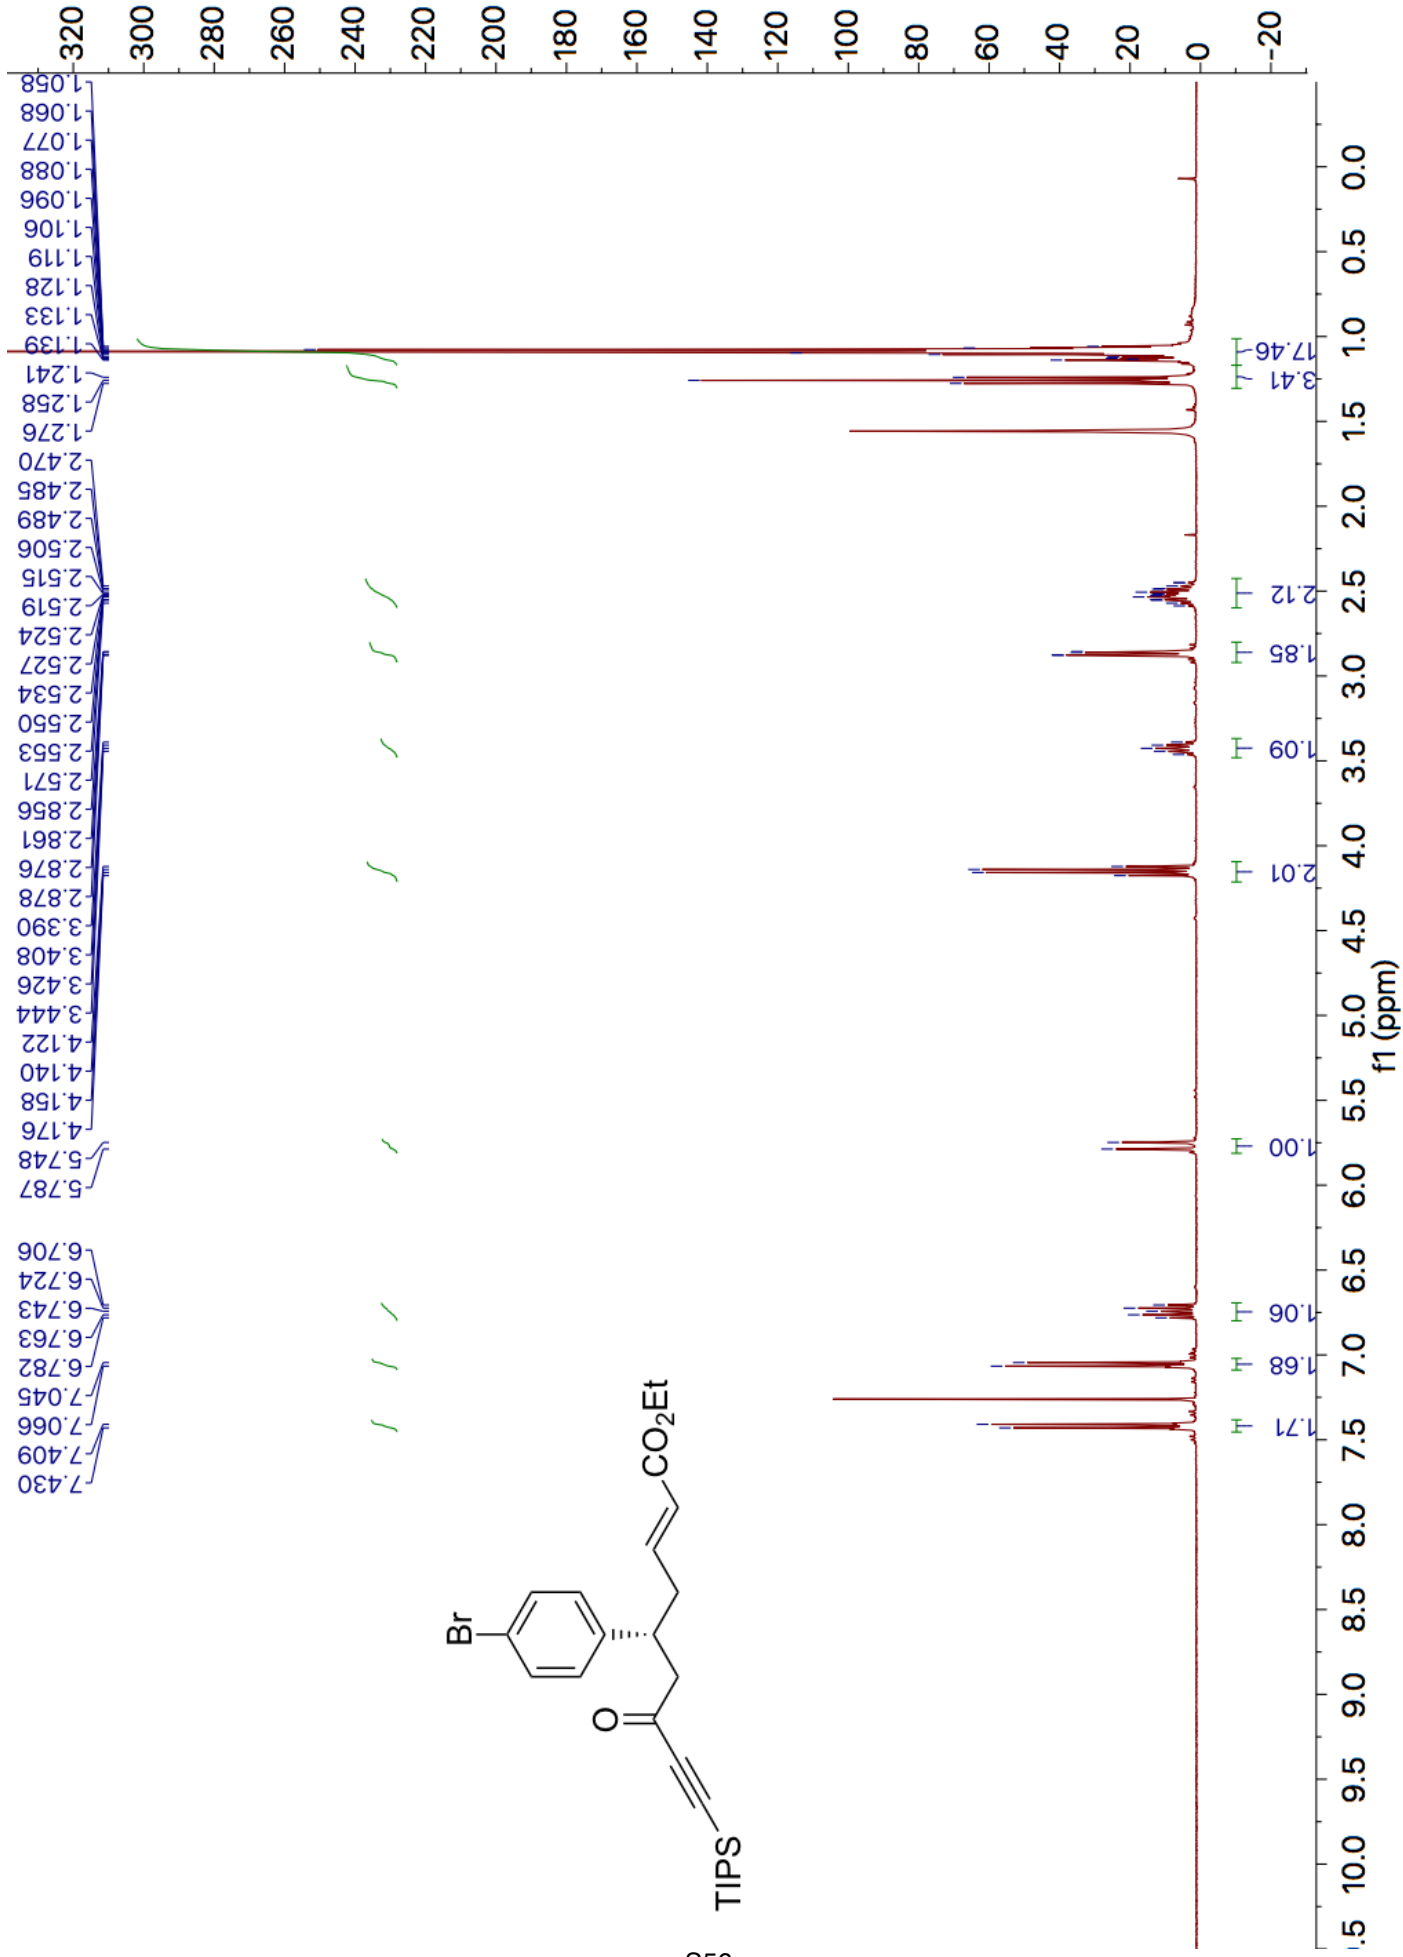



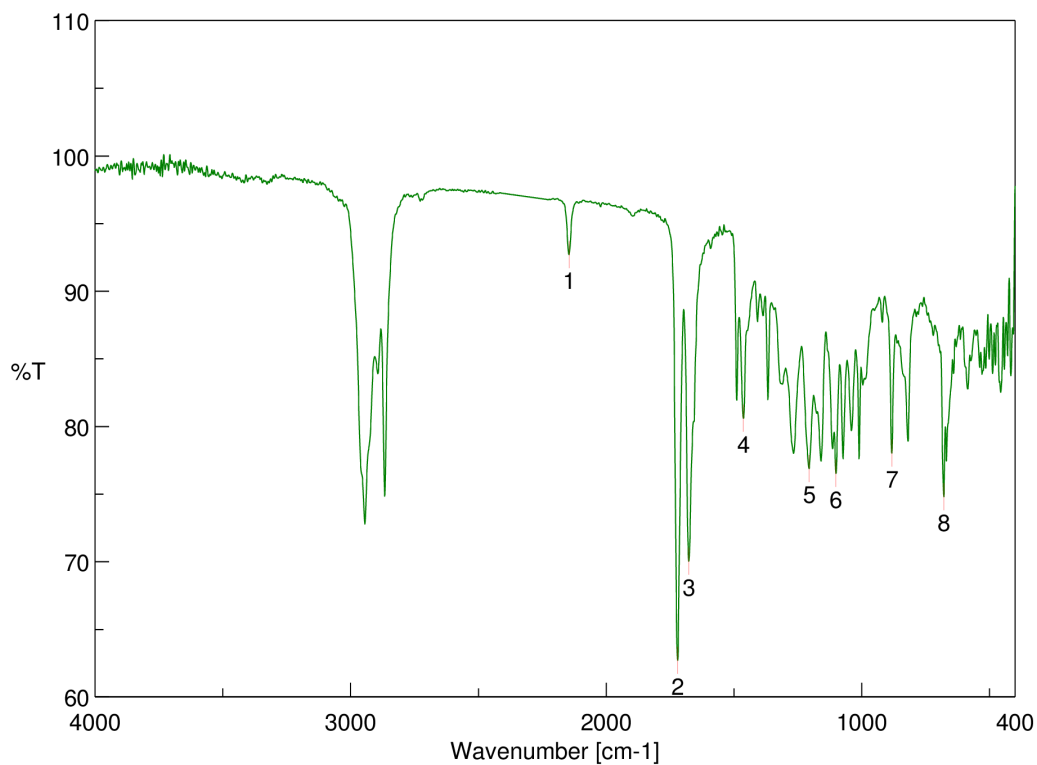

[ピーク検出結果]

| No. | 位置      | 強度      | No. | 位置      | 強度      |
|-----|---------|---------|-----|---------|---------|
| 1   | 2145.42 | 92.6808 | 2   | 1720.19 | 62.7037 |
| 3   | 1676.8  | 70.0386 | 4   | 1463.71 | 80.5901 |
| 5   | 1206.26 | 76.8825 | 6   | 1101.15 | 76.5214 |
| 7   | 882.274 | 78.0259 | 8   | 678.82  | 74.7902 |

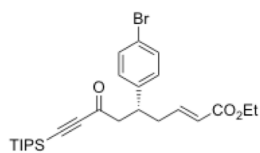

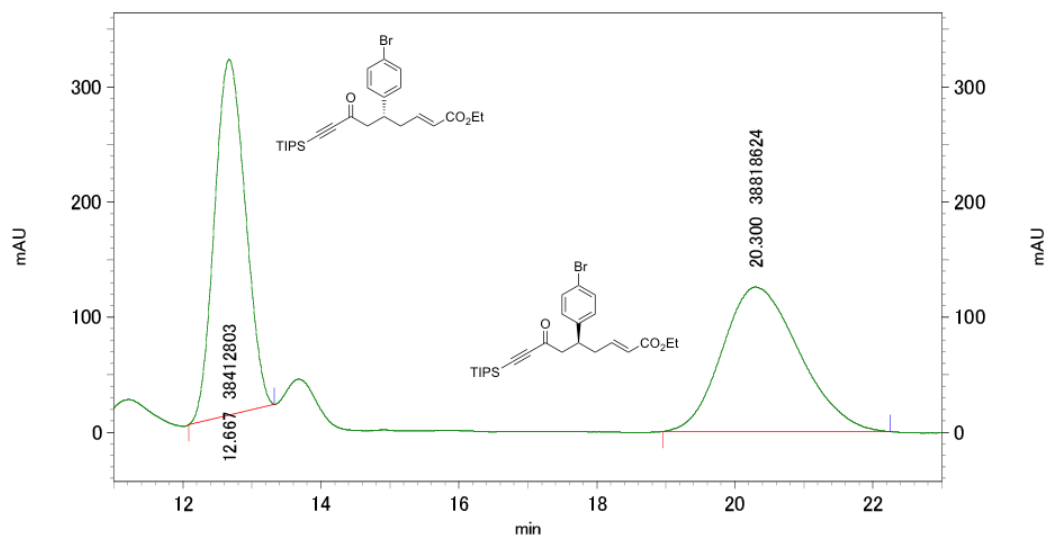

Result  
1: 234 nm, 4 nm

| 結果 | Pk #  | Retention time / min | Integration / % |
|----|-------|----------------------|-----------------|
|    | 1     | 12.667               | 49.737          |
|    | 2     | 20.300               | 50.263          |
|    | トータル  |                      | 100.000         |
|    | Total |                      |                 |

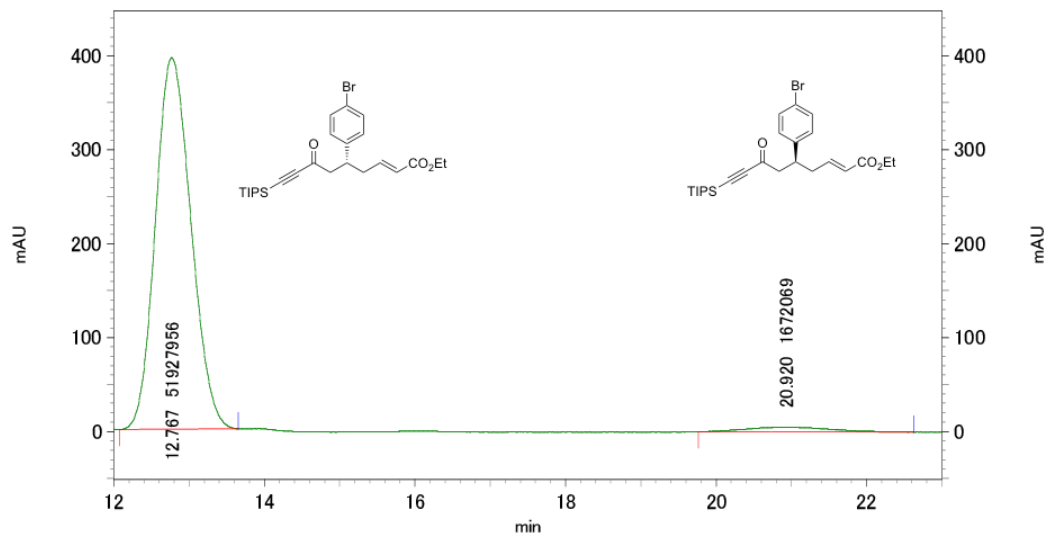

Result  
1: 233 nm, 4 nm 結果

| Pk #  | Retention time / min | Integration / % |
|-------|----------------------|-----------------|
| 1     | 12.767               | 96.880          |
| 2     | 20.920               | 3.120           |
| トータル  |                      | 100.000         |
| Total |                      |                 |





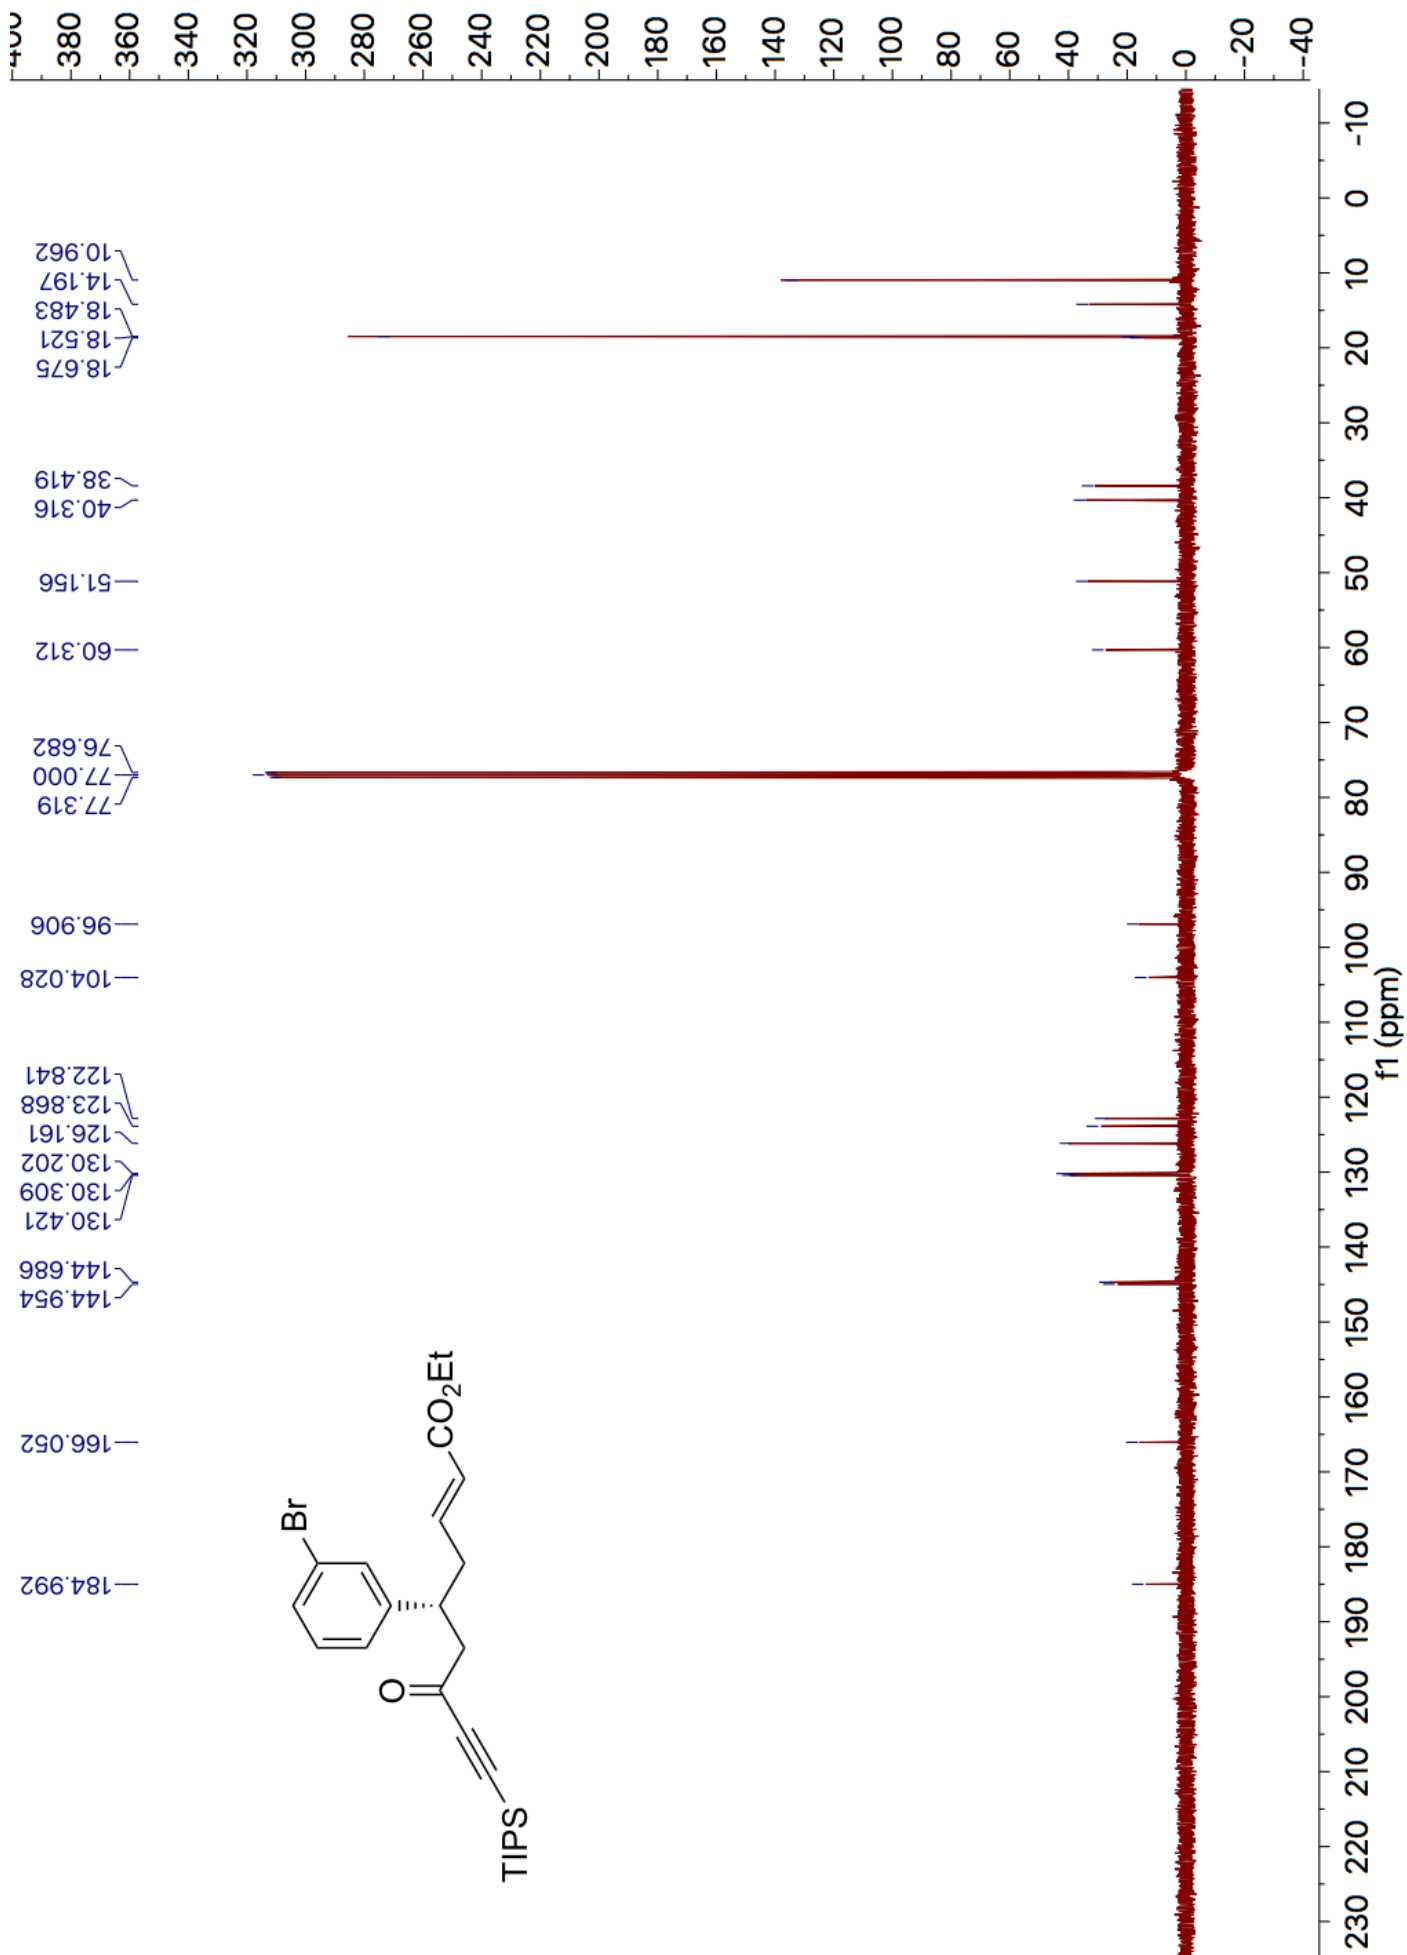

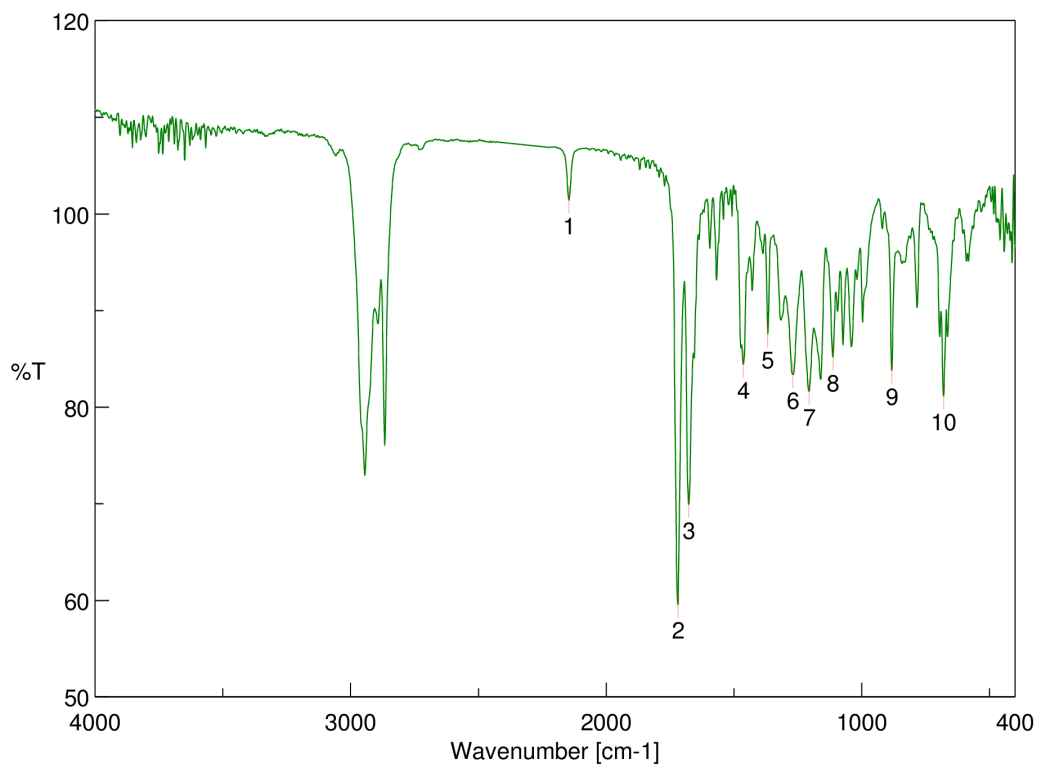

[ピーク検出結果]

| No. | 位置      | 強度      | No. | 位置      | 強度      |
|-----|---------|---------|-----|---------|---------|
| 1   | 2146.38 | 101.433 | 2   | 1719.23 | 59.5812 |
| 3   | 1676.8  | 69.9177 | 4   | 1463.71 | 84.4217 |
| 5   | 1367.28 | 87.5675 | 6   | 1269.9  | 83.3779 |
| 7   | 1206.26 | 81.6407 | 8   | 1112.73 | 85.1871 |
| 9   | 882.274 | 83.7914 | 10  | 679.785 | 81.126  |

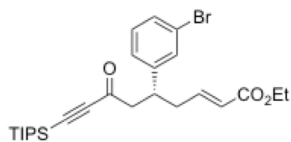

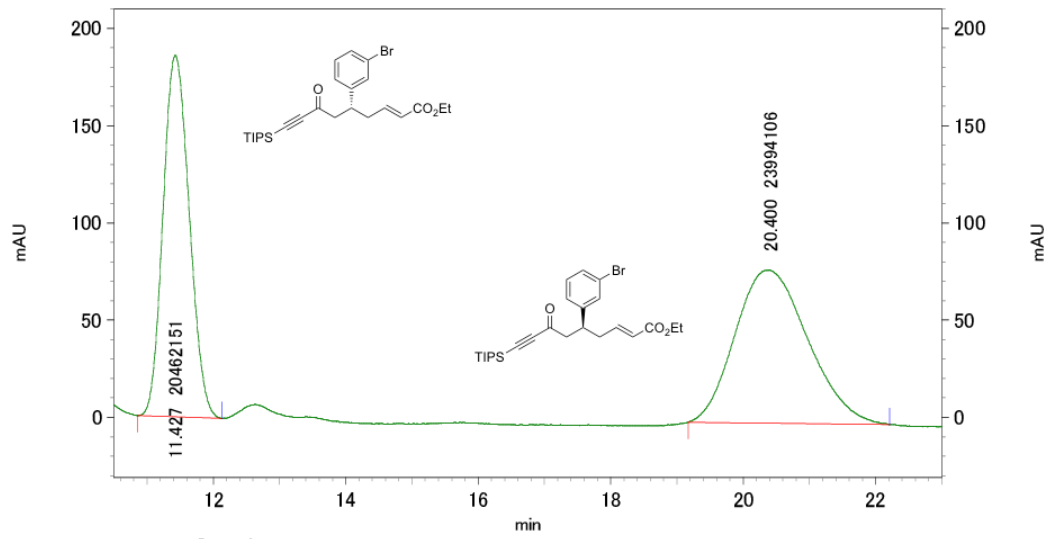

Result  
1: 234 nm, 4 nm 結果

| Pk #  | Retention time / min | Integration / % |
|-------|----------------------|-----------------|
| 1     | 11.427               | 46.028          |
| 2     | 20.400               | 53.972          |
| トータル  |                      | 100.000         |
| Total |                      |                 |

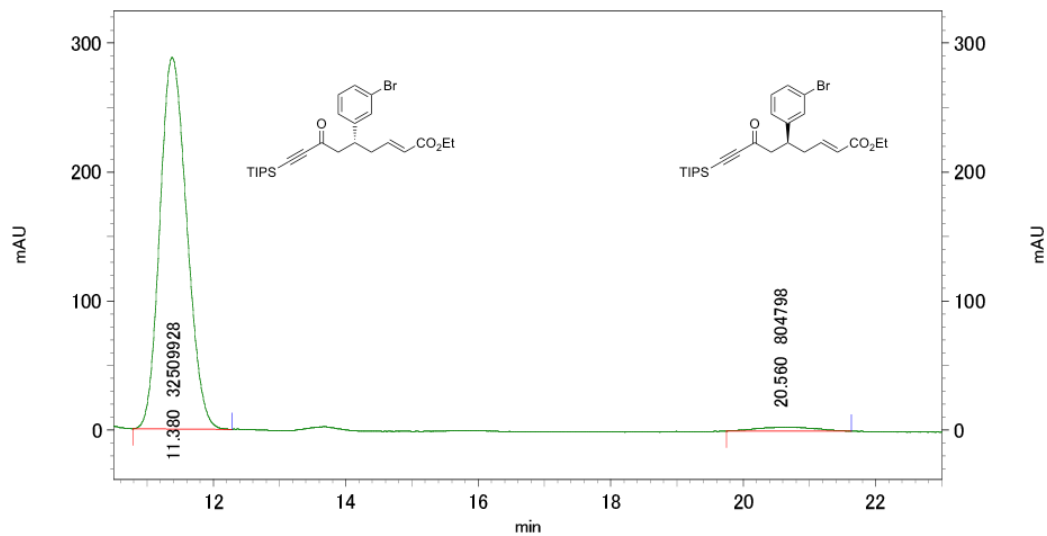

Result  
1: 234 nm, 4 nm 結果

| Pk #  | Retention time / min | Integration / % |
|-------|----------------------|-----------------|
| 1     | 11.380               | 97.584          |
| 2     | 20.560               | 2.416           |
| トータル  |                      | 100.000         |
| Total |                      |                 |

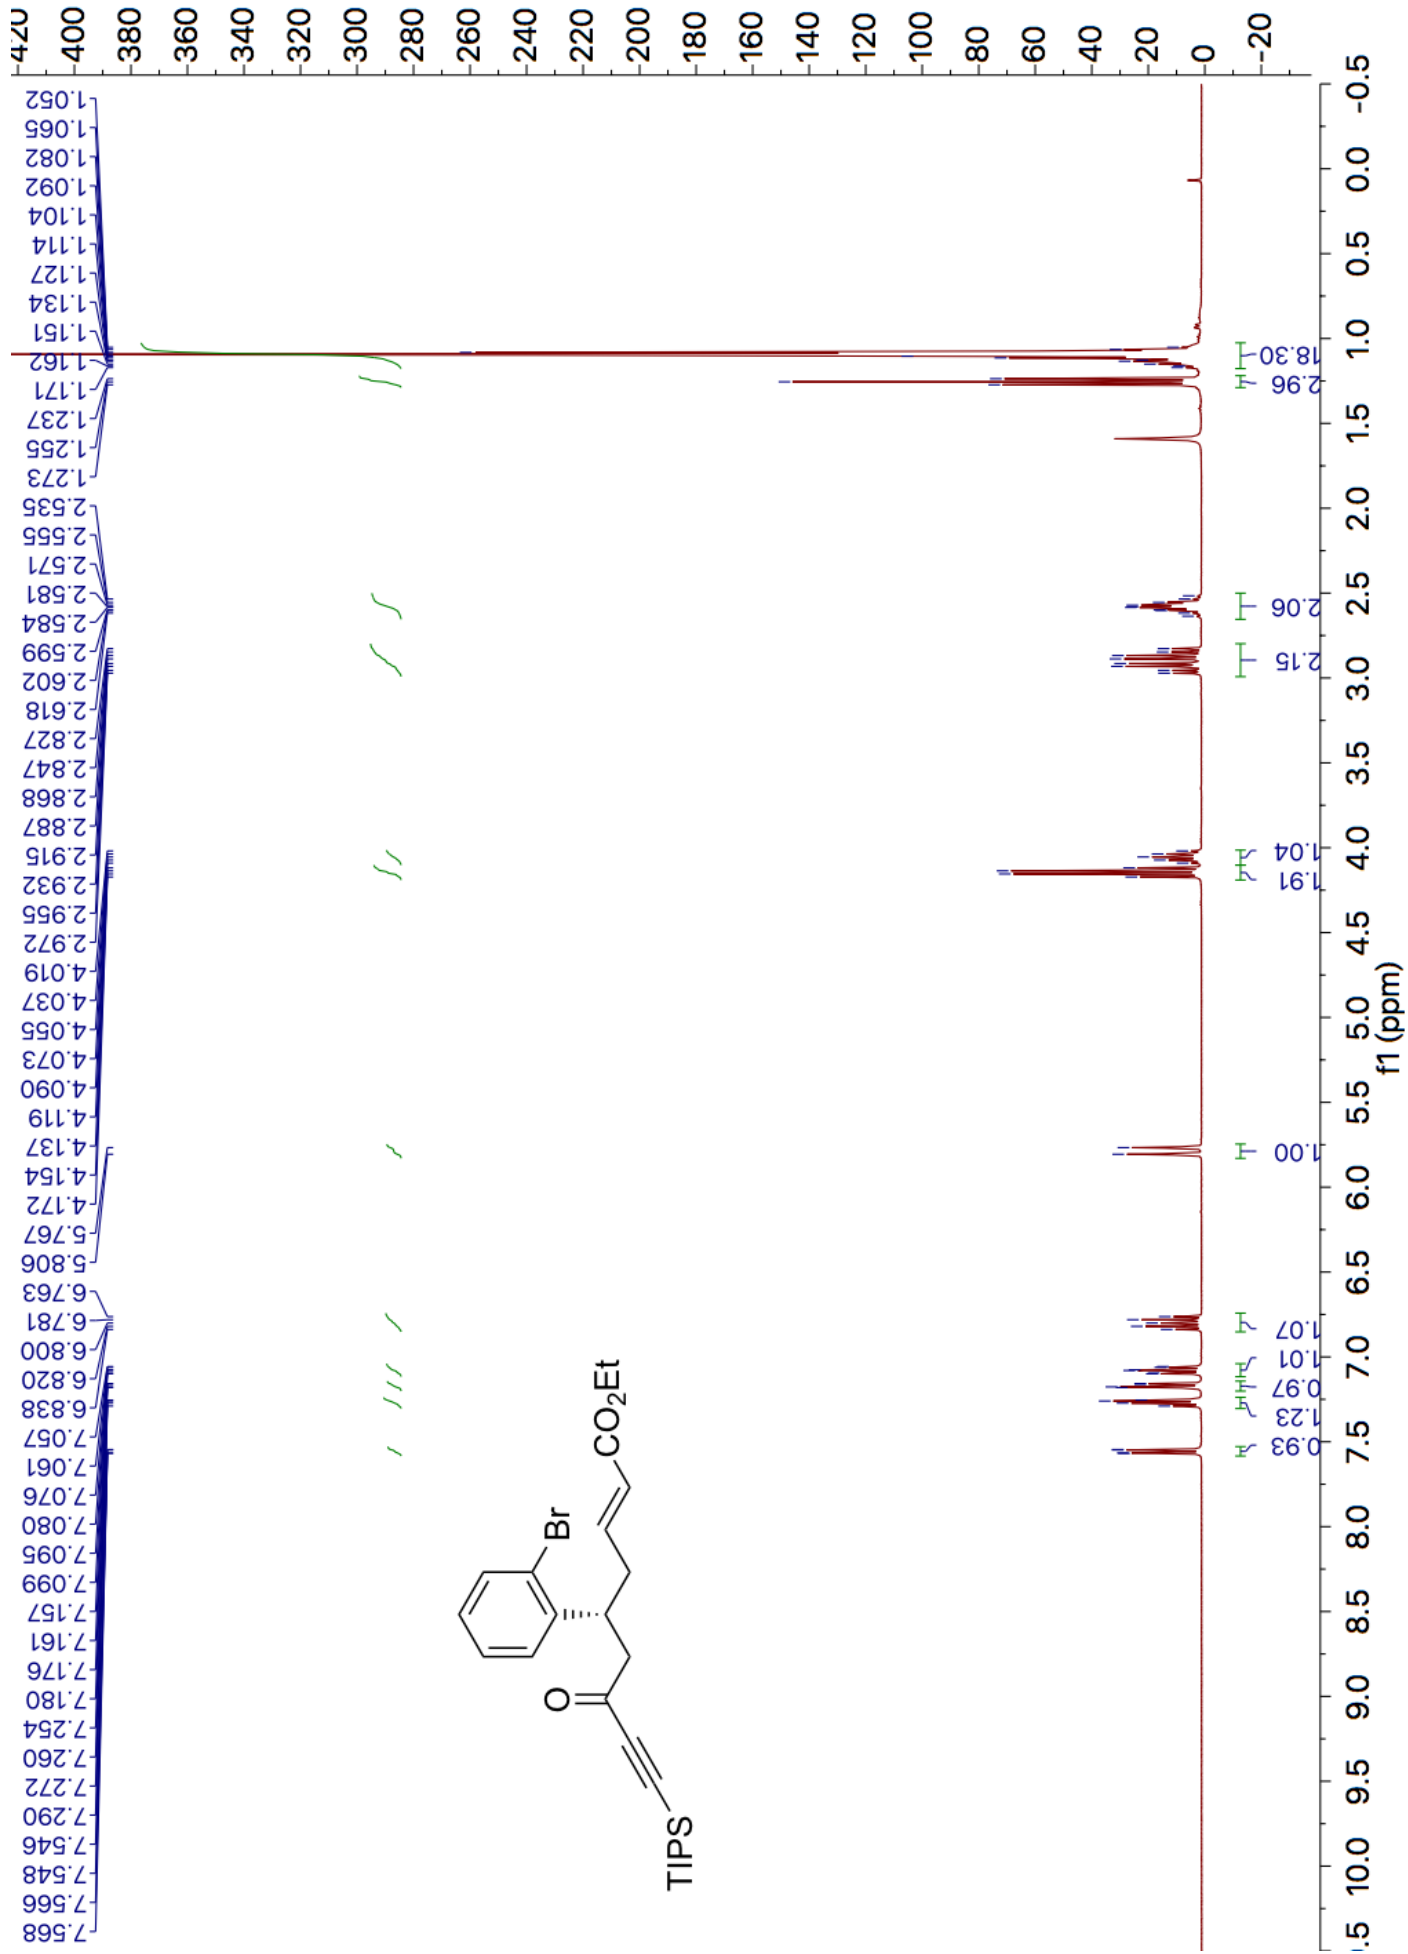

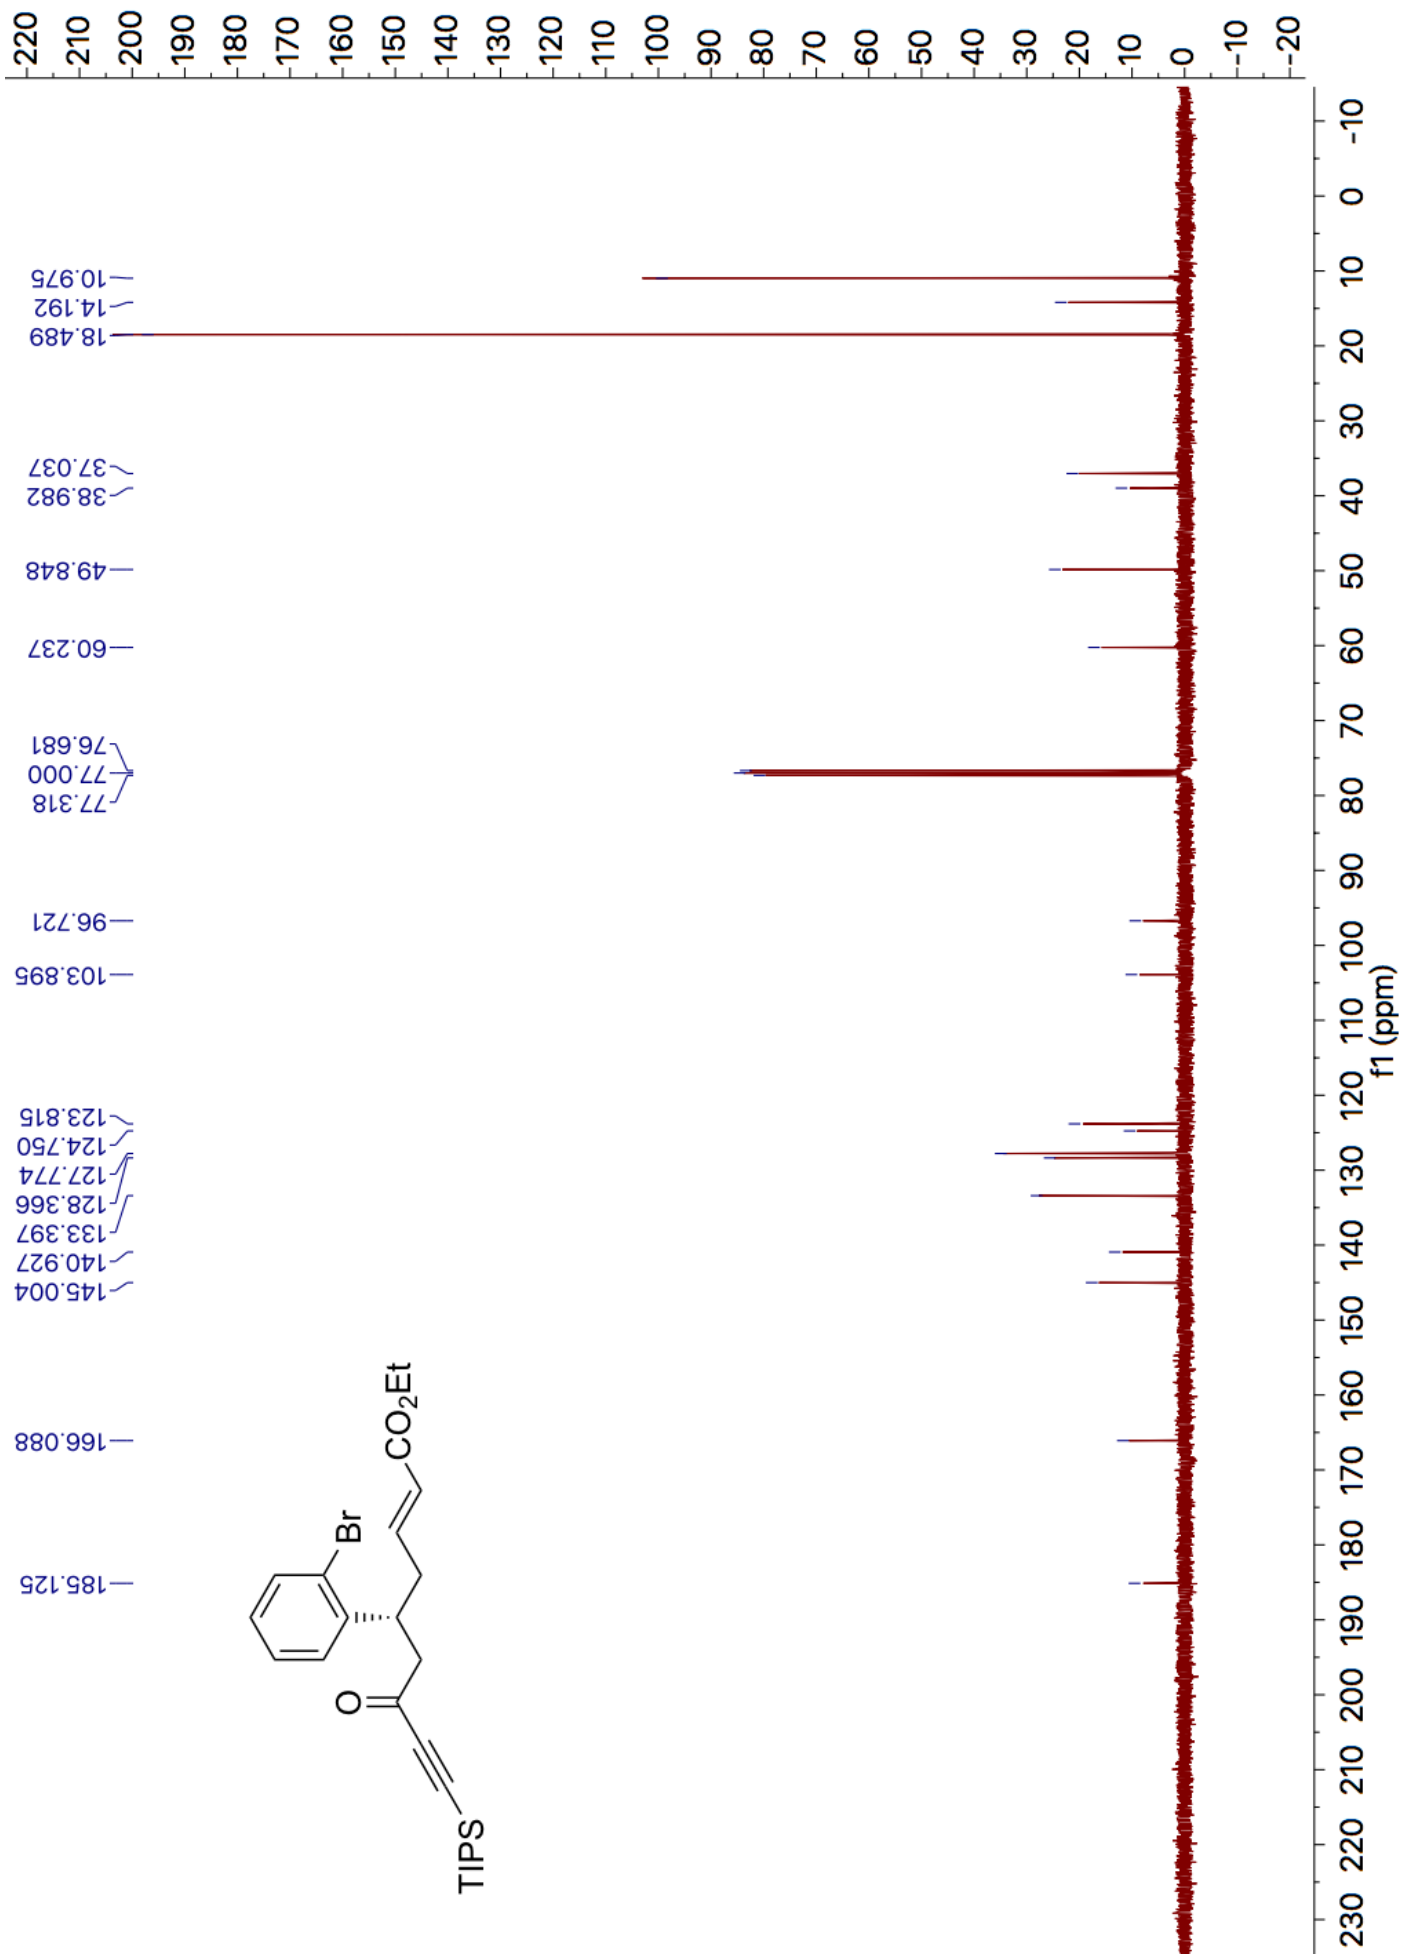

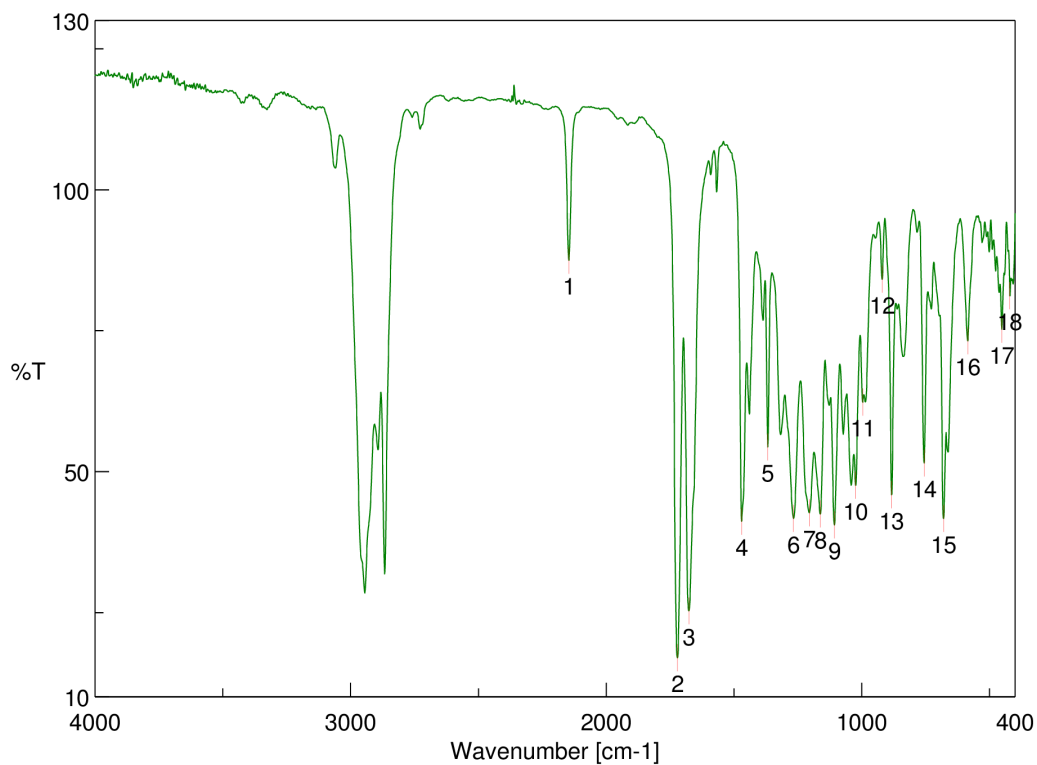

[ピーク検出結果]

| No. | 位置      | 強度      | No. | 位置      | 強度      |
|-----|---------|---------|-----|---------|---------|
| 1   | 2146.38 | 87.4447 | 2   | 1721.16 | 16.9312 |
| 3   | 1675.84 | 25.2578 | 4   | 1470.46 | 41.1771 |
| 5   | 1367.28 | 54.3629 | 6   | 1267    | 41.6697 |
| 7   | 1205.29 | 42.6426 | 8   | 1161.9  | 42.4444 |
| 9   | 1106.94 | 40.5302 | 10  | 1024.02 | 47.5424 |
| 11  | 996.053 | 62.2804 | 12  | 919.879 | 84.0874 |
| 13  | 883.238 | 45.8727 | 14  | 755.959 | 51.4923 |
| 15  | 679.785 | 41.676  | 16  | 585.29  | 73.1495 |
| 17  | 452.225 | 75.2175 | 18  | 420.406 | 81.1371 |

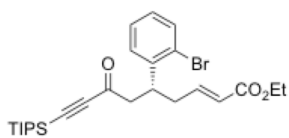



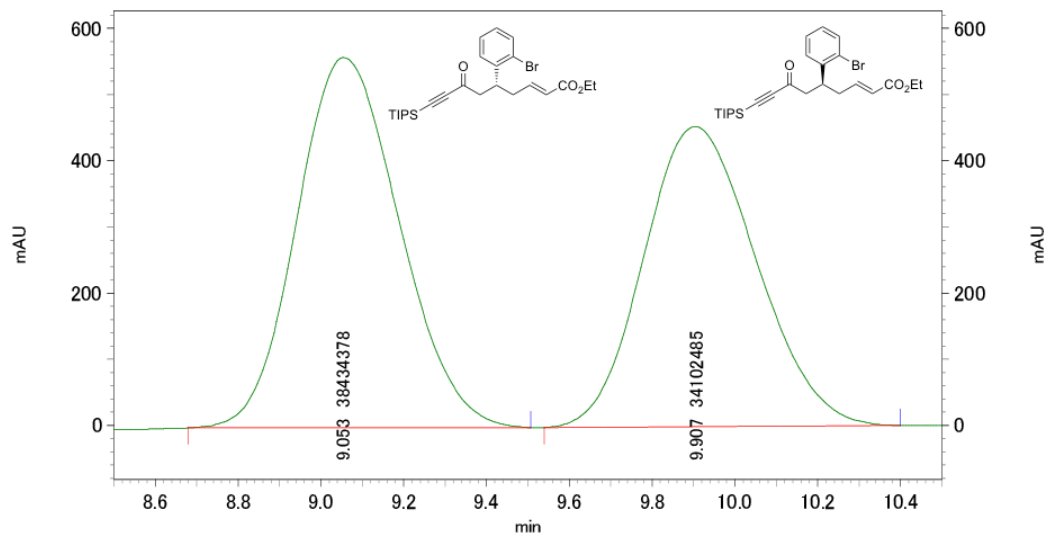

Result  
1: 234 nm, 4 nm 結果

| Pk #  | Retention time / min | Integration / % |
|-------|----------------------|-----------------|
| 1     | 9.053                | 52.986          |
| 2     | 9.907                | 47.014          |
| トータル  |                      | 100.000         |
| Total |                      |                 |

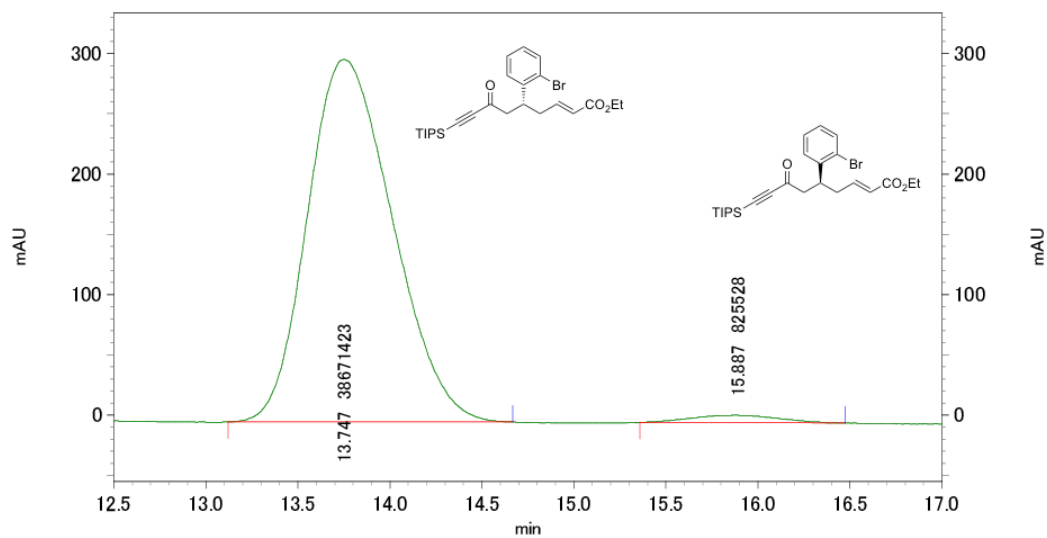

Result  
1: 234 nm, 4 nm 結果

| Pk #  | Retention time / min | Integration / % |
|-------|----------------------|-----------------|
| 1     | 13.747               | 97.910          |
| 2     | 15.887               | 2.090           |
| トータル  |                      | 100.000         |
| Total |                      |                 |

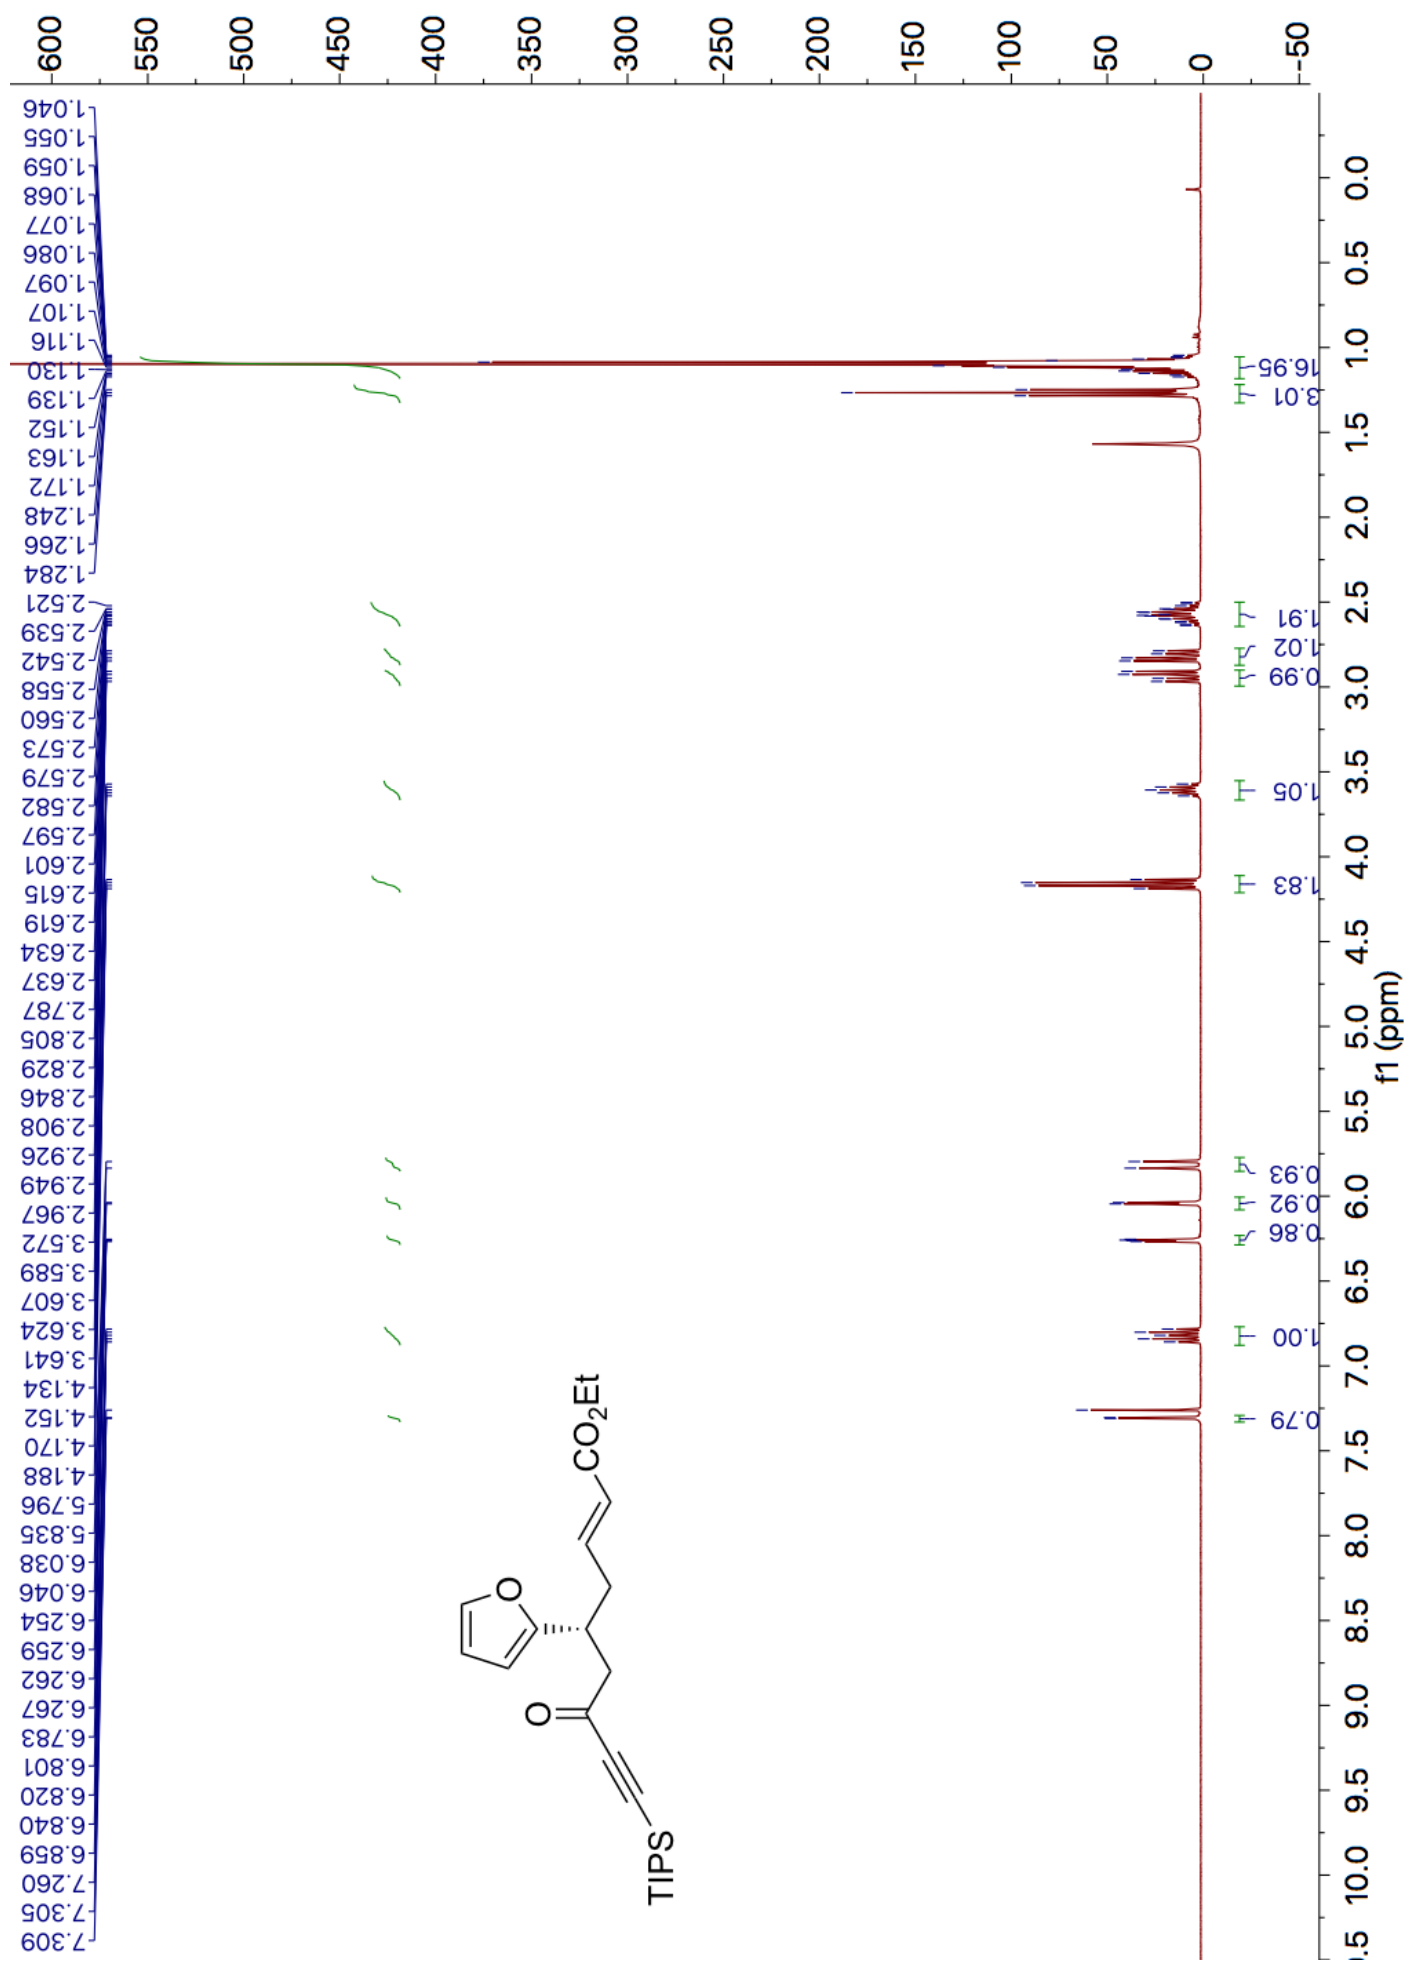

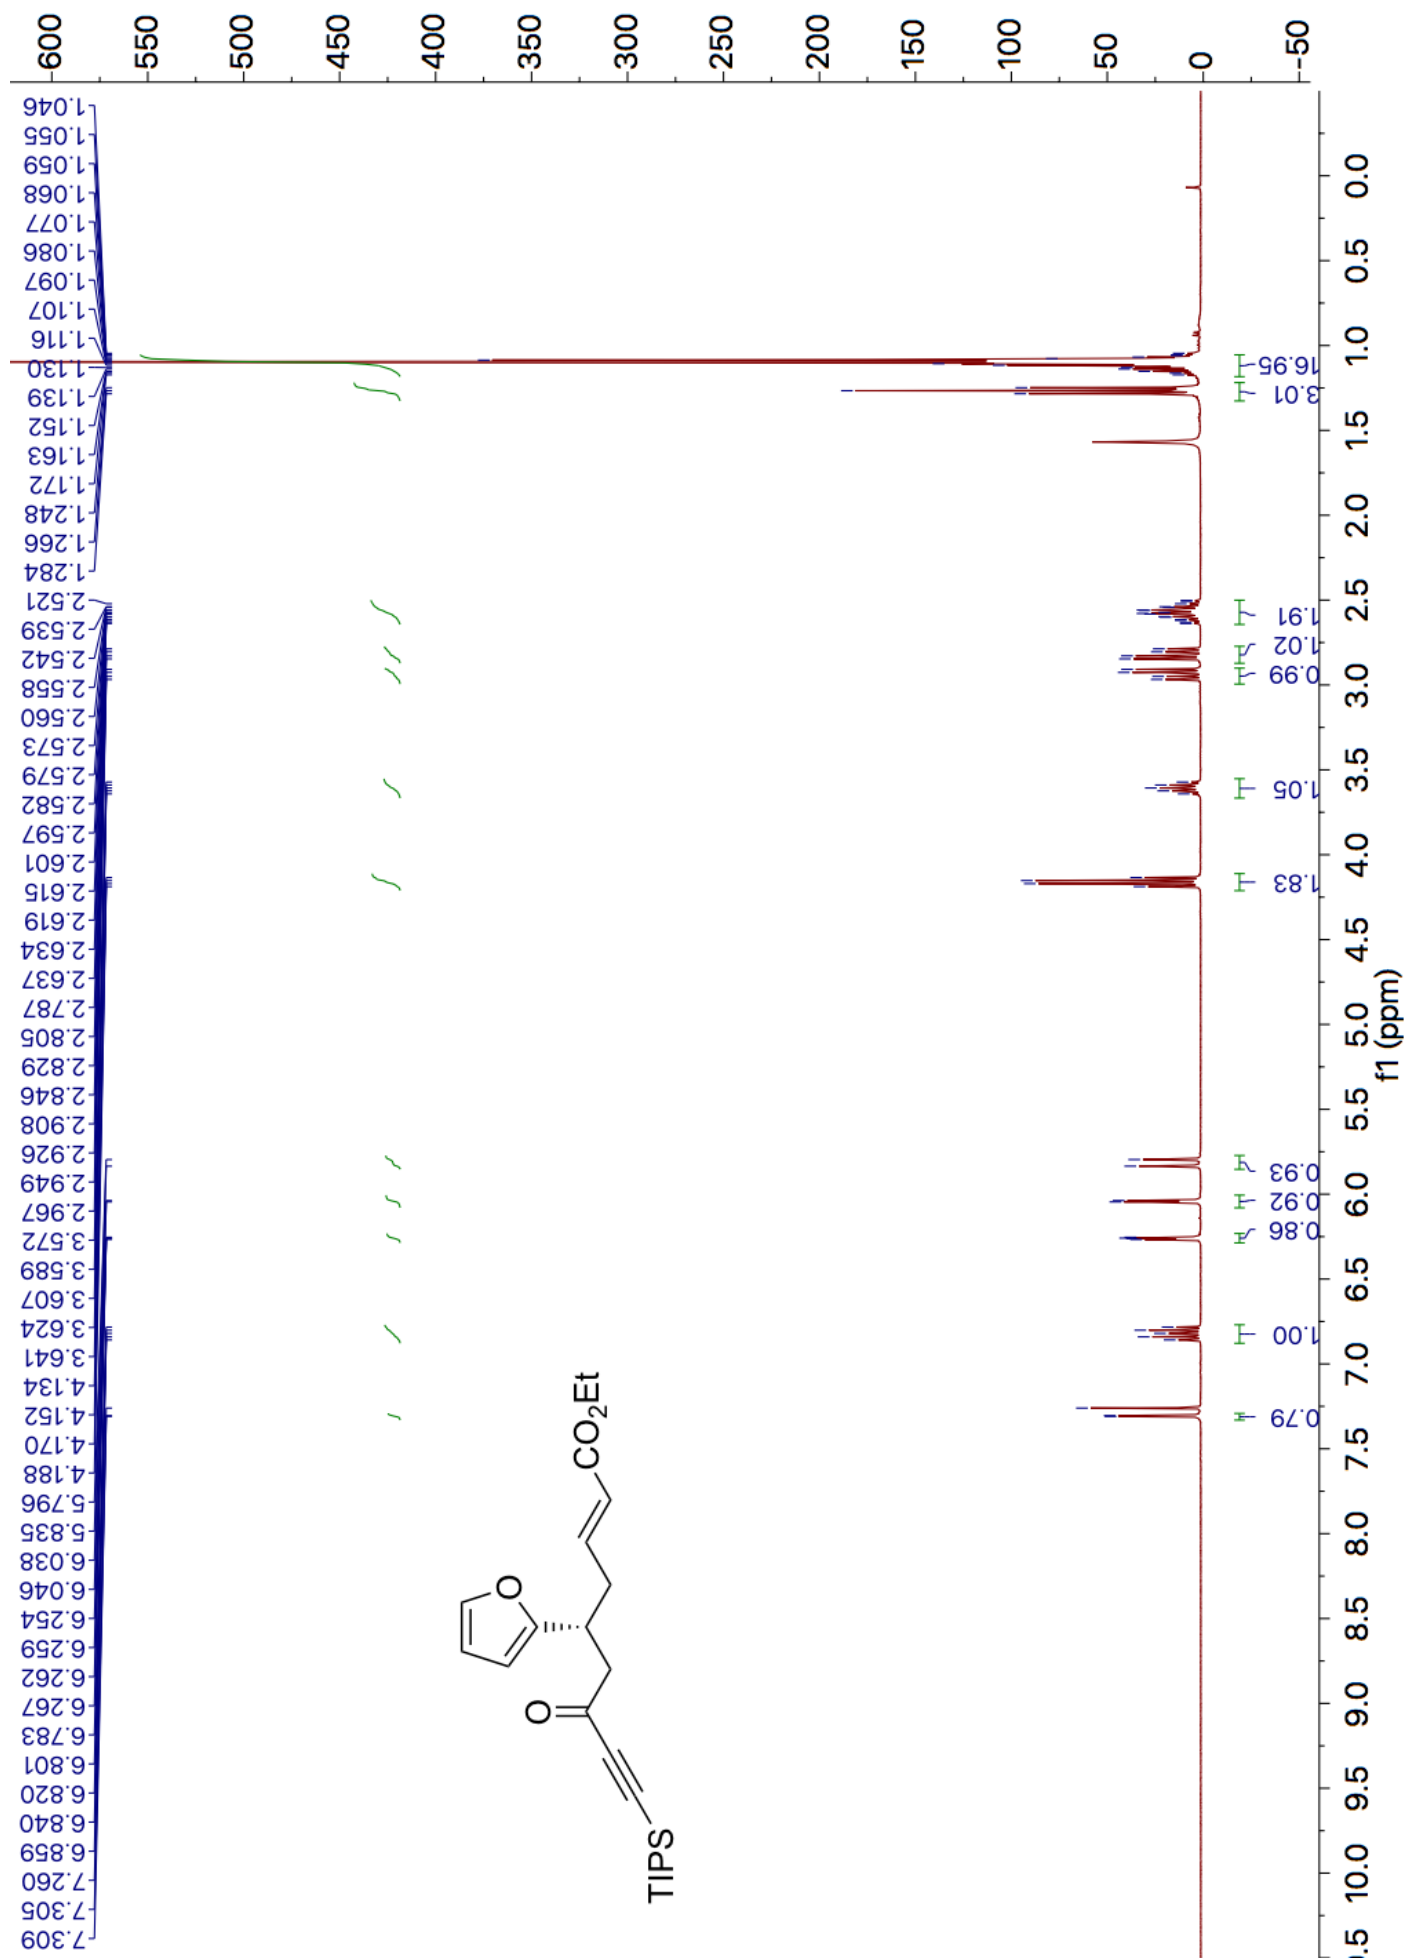

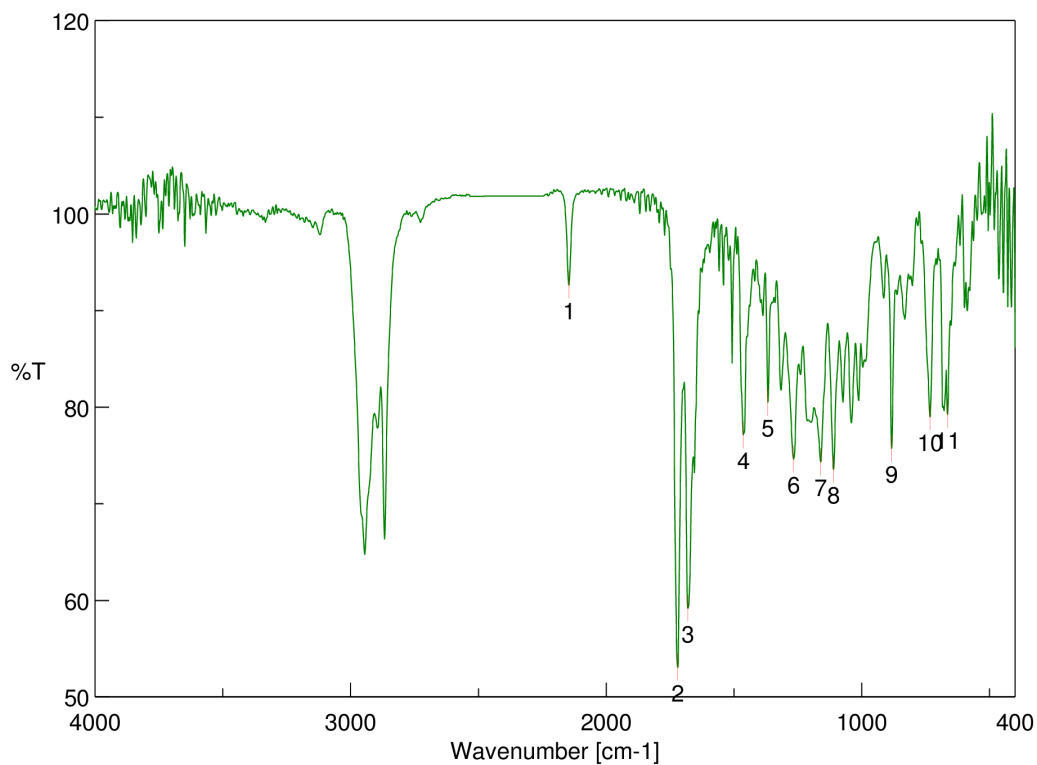

[ピーク検出結果]

| No. | 位置      | 強度      | No. | 位置      | 強度      |
|-----|---------|---------|-----|---------|---------|
| 1   | 2146.38 | 92.6141 | 2   | 1720.19 | 53.0539 |
| 3   | 1680.66 | 59.1653 | 4   | 1463.71 | 77.1184 |
| 5   | 1367.28 | 80.4945 | 6   | 1267    | 74.6197 |
| 7   | 1160.94 | 74.3223 | 8   | 1109.83 | 73.5718 |
| 9   | 883.238 | 75.7183 | 10  | 732.817 | 78.9756 |
| 11  | 664.357 | 79.2511 |     |         |         |

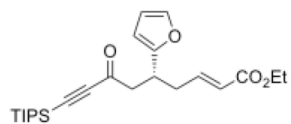

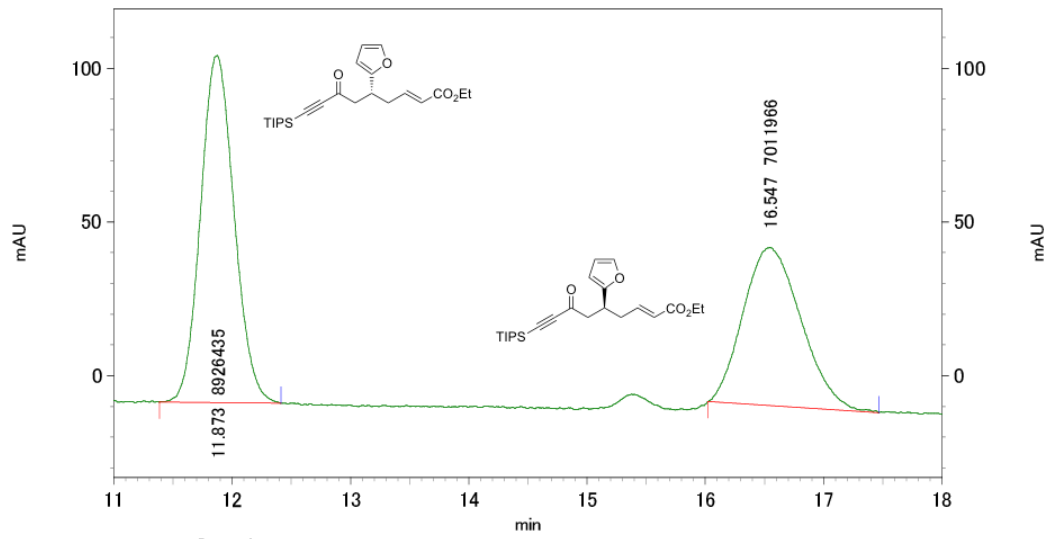

Result  
1: 213 nm, 4 nm 結果

| Pk # | Retention time / min | Integration / % |
|------|----------------------|-----------------|
| 1    | 11.873               | 56.006          |
| 2    | 16.547               | 43.994          |

|       |  |         |
|-------|--|---------|
| トータル  |  | 100.000 |
| Total |  |         |

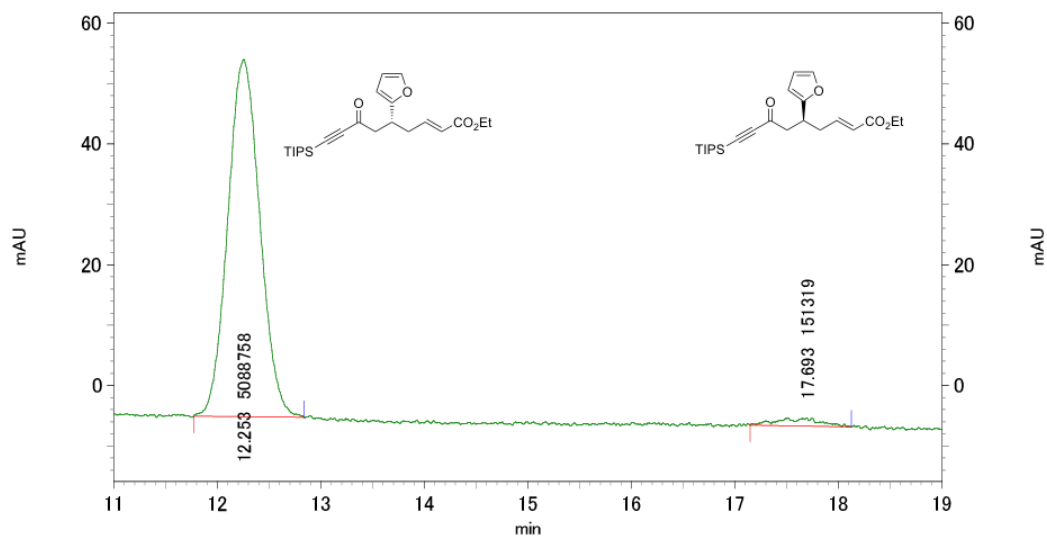

Result  
1: 213 nm, 4 nm結果

| Pk #          | Retention time / min | Integration / % |
|---------------|----------------------|-----------------|
| 1             | 12.253               | 97.112          |
| 2             | 17.693               | 2.888           |
| トータル<br>Total |                      | 100.000         |





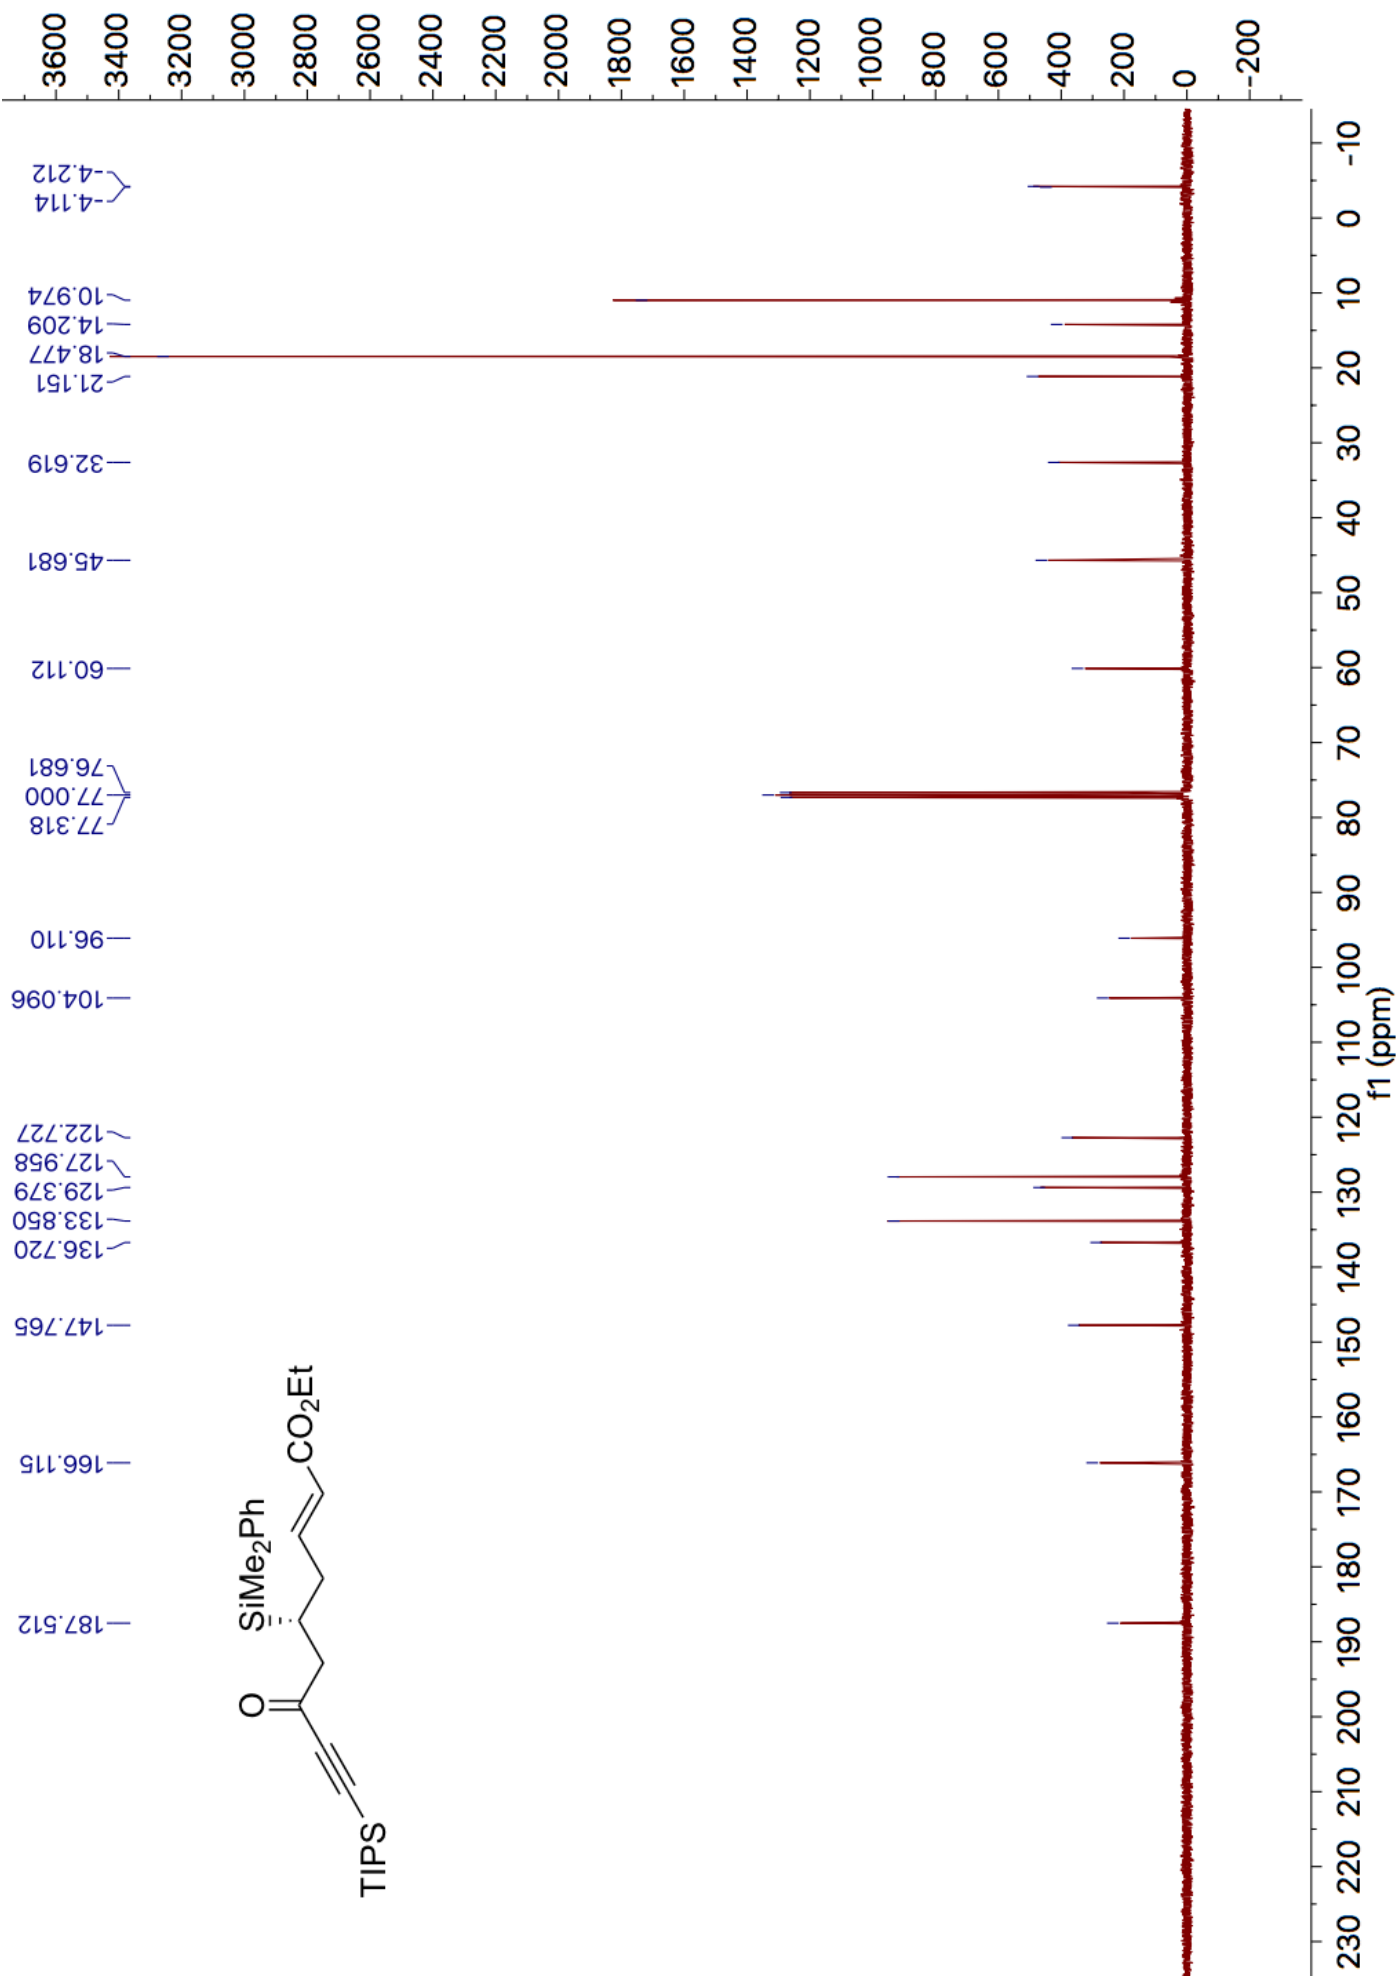

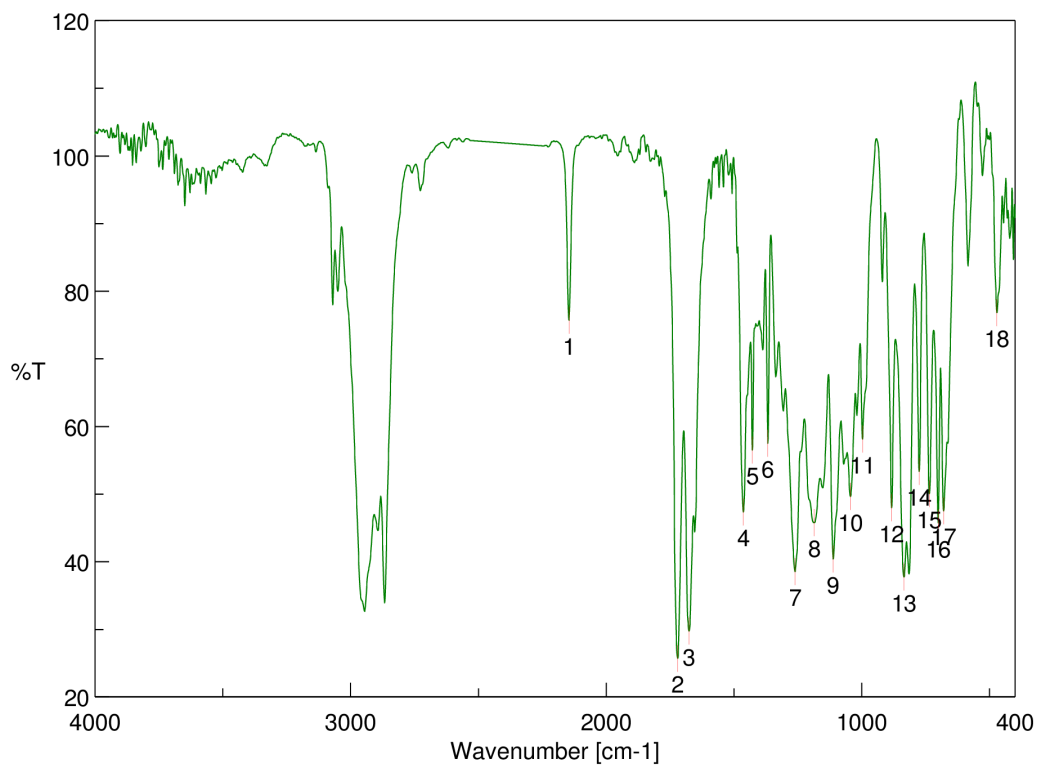

[ピーク検出結果]

| No. | 位置      | 強度      | No. | 位置      | 強度      |
|-----|---------|---------|-----|---------|---------|
| 1   | 2145.42 | 75.6876 | 2   | 1720.19 | 25.7176 |
| 3   | 1675.84 | 29.7196 | 4   | 1463.71 | 47.3614 |
| 5   | 1428.03 | 56.479  | 6   | 1367.28 | 57.4964 |
| 7   | 1261.22 | 38.5372 | 8   | 1186.01 | 45.7387 |
| 9   | 1111.76 | 40.3718 | 10  | 1044.26 | 49.6385 |
| 11  | 997.017 | 58.1297 | 12  | 883.238 | 47.9641 |
| 13  | 835.026 | 37.7479 | 14  | 775.244 | 53.3237 |
| 15  | 735.71  | 50.0408 | 16  | 700.998 | 45.7245 |
| 17  | 679.785 | 47.497  | 18  | 471.51  | 76.8163 |

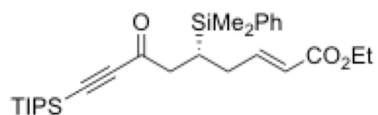

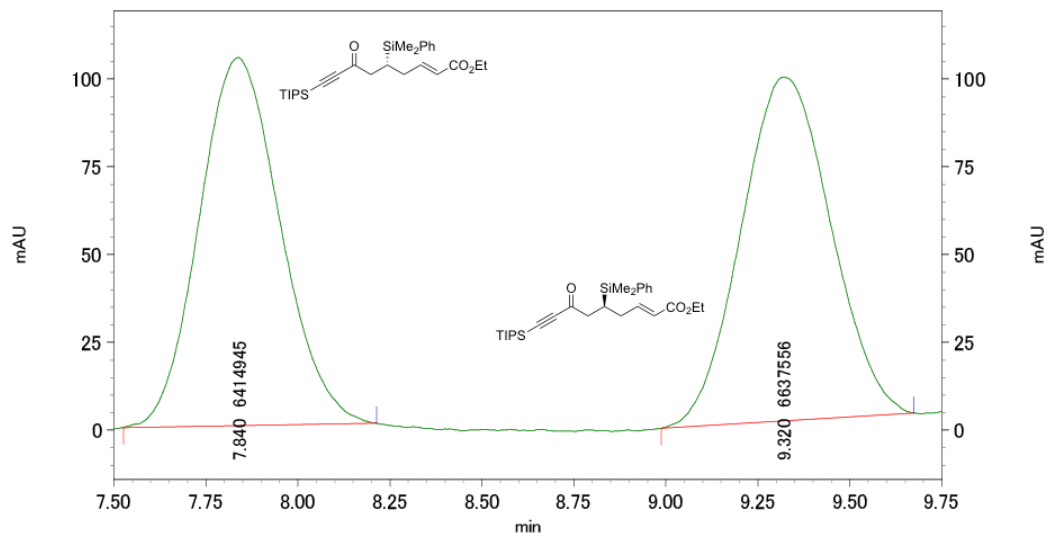

Result  
1: 213 nm, 4 nm 結果

| Pk #  | Retention time / min | Integration / % |
|-------|----------------------|-----------------|
| 1     | 7.840                | 49.147          |
| 2     | 9.320                | 50.853          |
| トータル  |                      | 100.000         |
| Total |                      |                 |

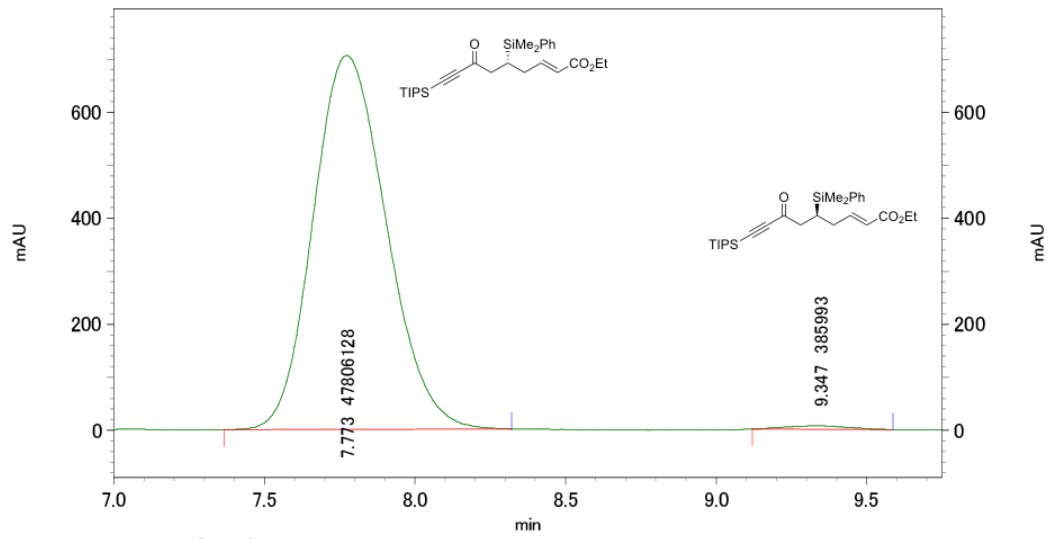

Result  
1: 213 nm, 4 nm 結果

| Pk #  | Retention time / min | Integration / % |
|-------|----------------------|-----------------|
| 1     | 7.773                | 99.199          |
| 2     | 9.347                | 0.801           |
| トータル  |                      | 100.000         |
| Total |                      |                 |

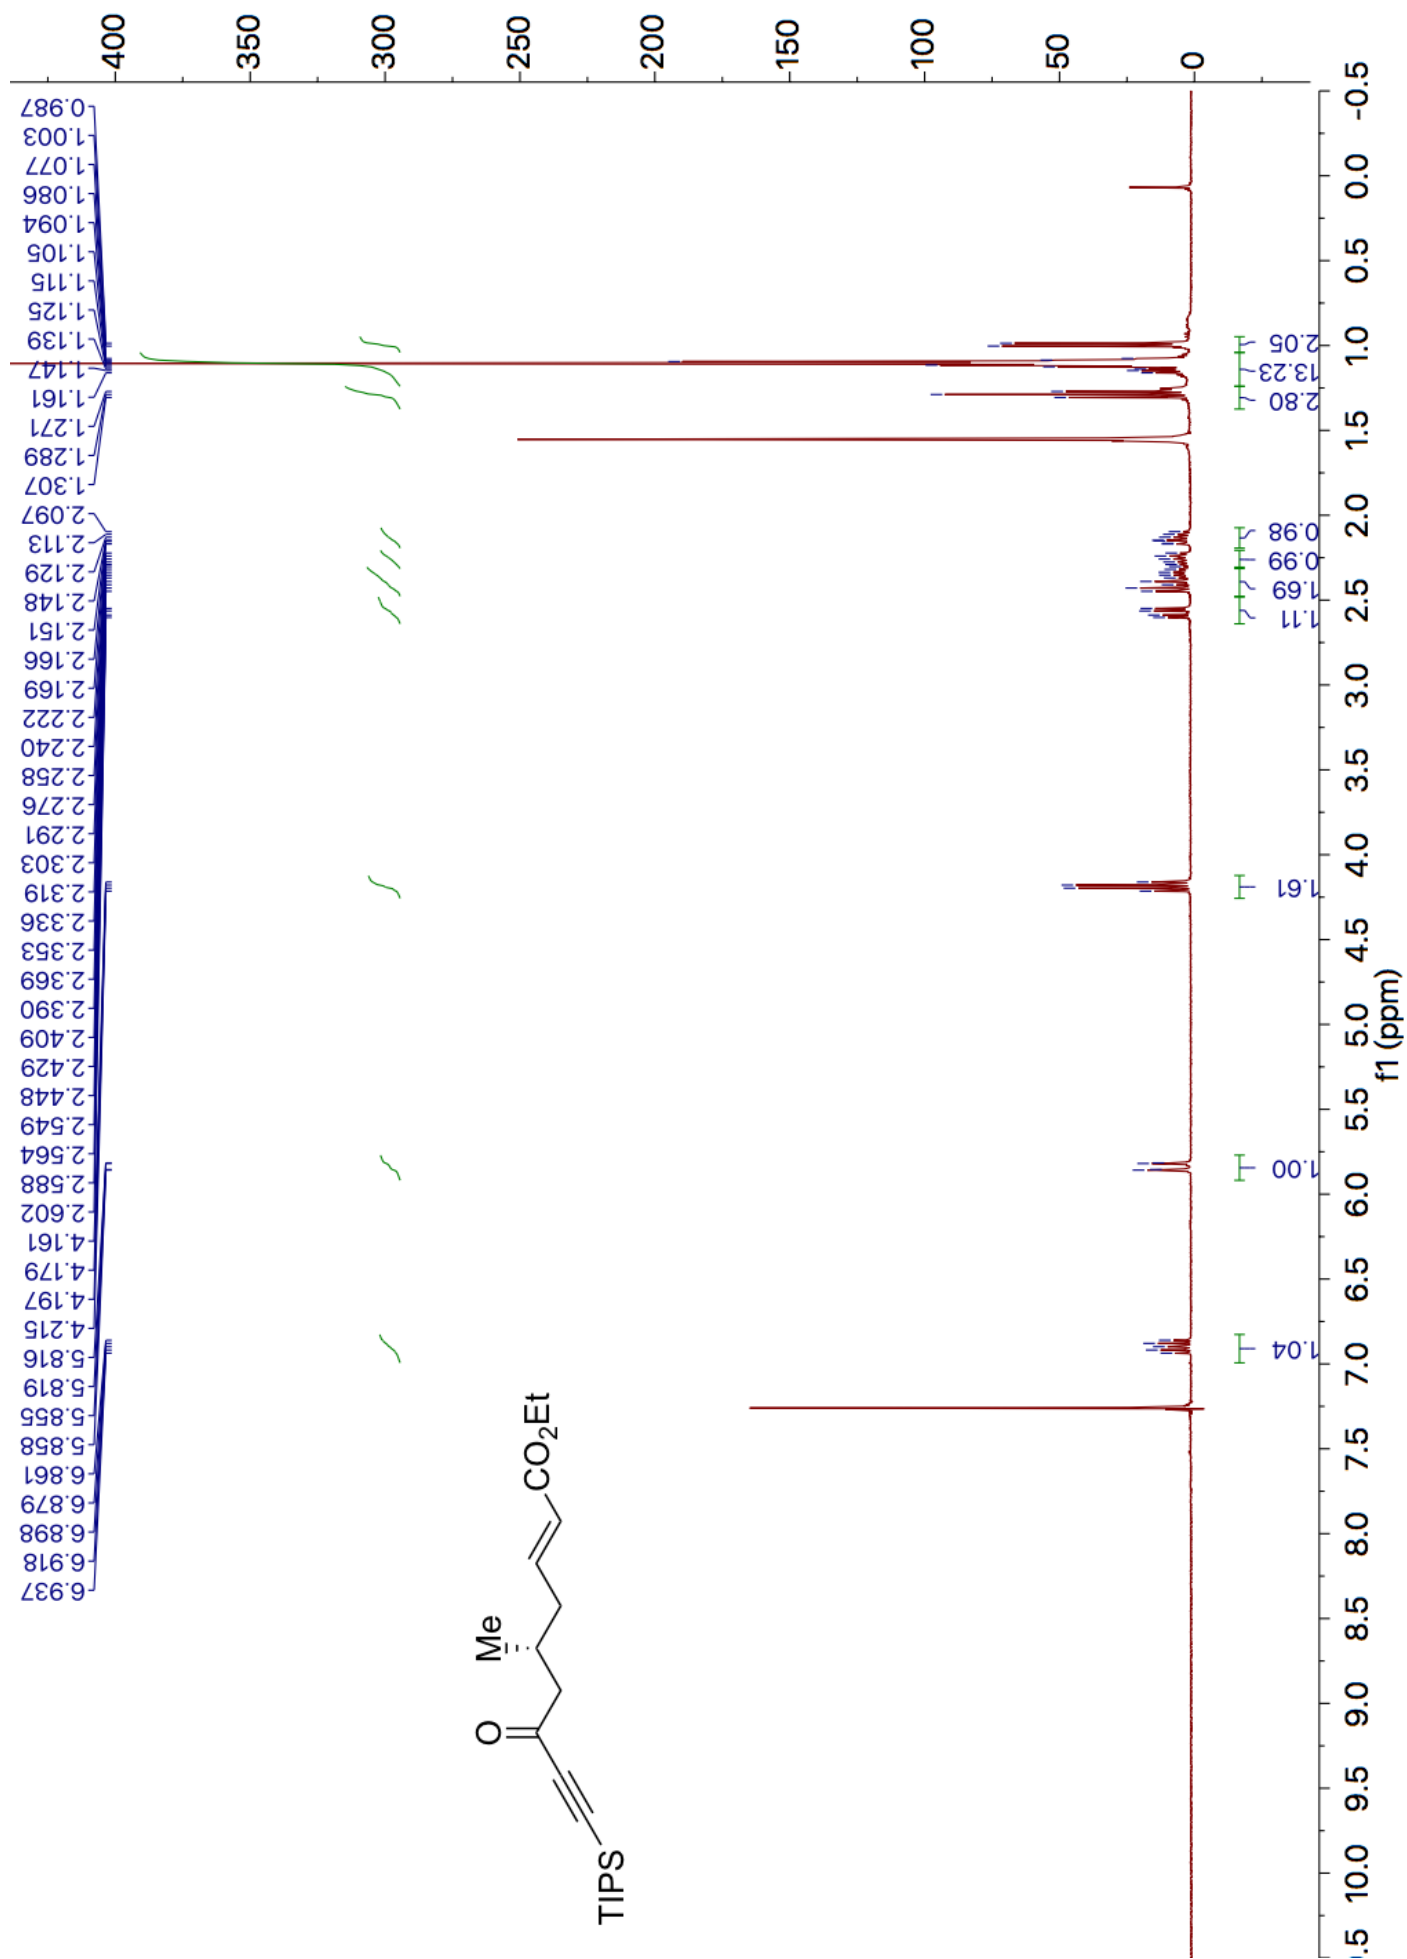

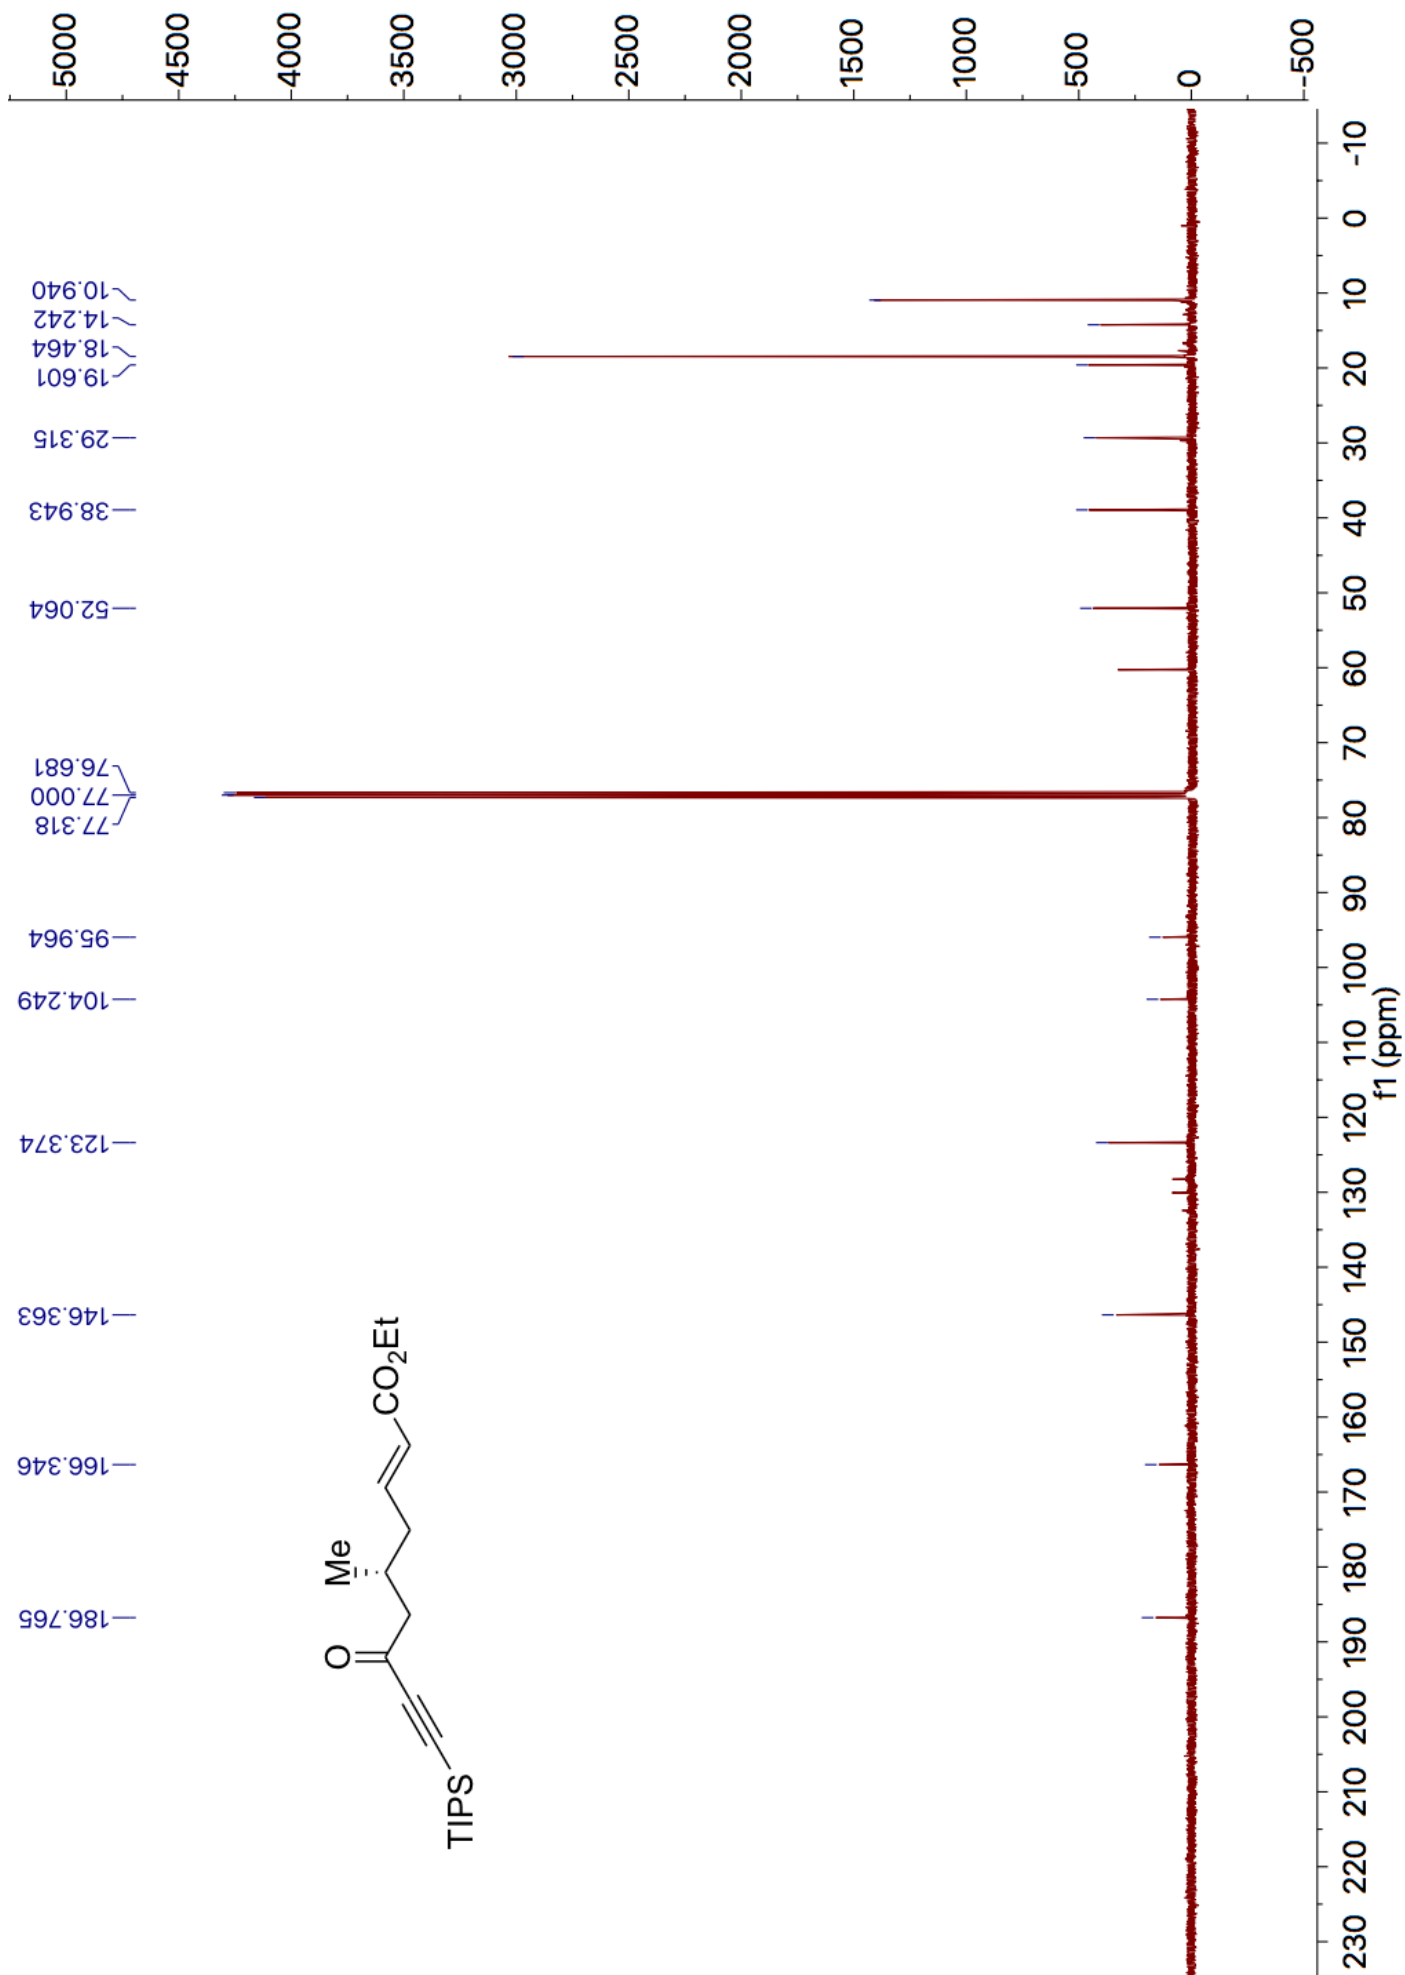

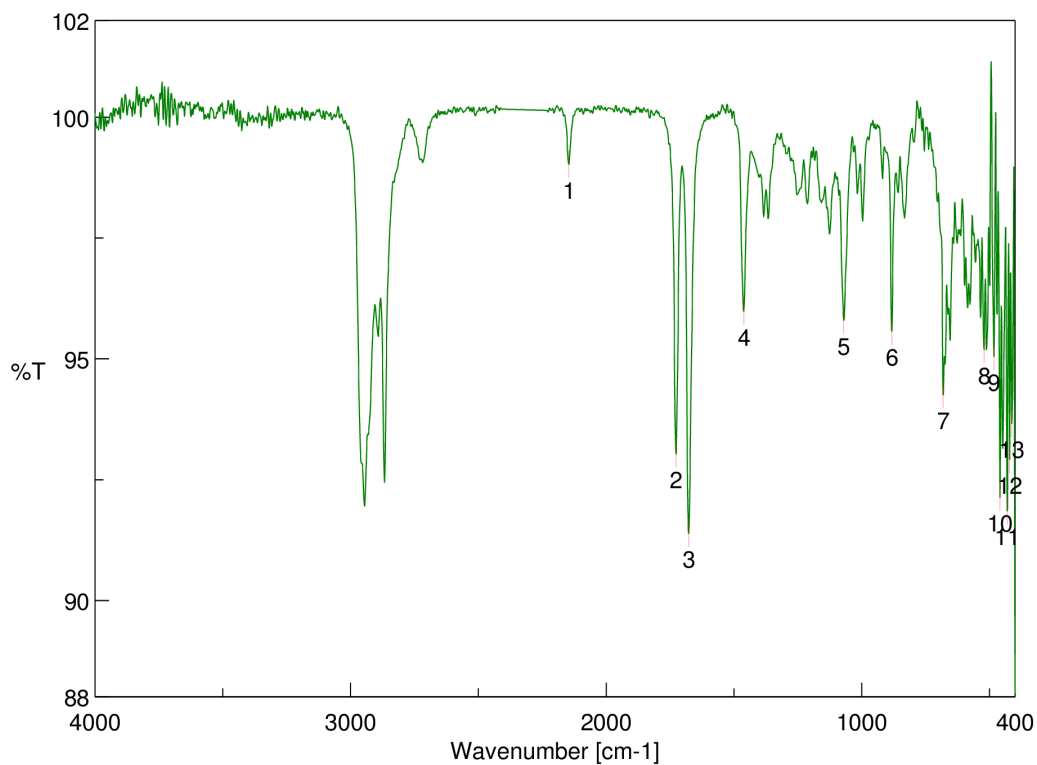

[ ピーク検出結果 ]

| No. | 位置      | 強度      | No. | 位置      | 強度      |
|-----|---------|---------|-----|---------|---------|
| 1   | 2146.38 | 99.0249 | 2   | 1726.94 | 93.0258 |
| 3   | 1676.8  | 91.3858 | 4   | 1461.78 | 95.983  |
| 5   | 1070.3  | 95.798  | 6   | 882.274 | 95.5699 |
| 7   | 681.713 | 94.2521 | 8   | 521.65  | 95.1872 |
| 9   | 483.081 | 95.0478 | 10  | 458.975 | 92.1311 |
| 11  | 431.012 | 91.8513 | 12  | 421.37  | 92.919  |
| 13  | 412.692 | 93.659  |     |         |         |

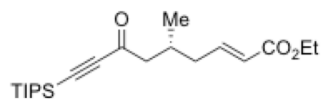

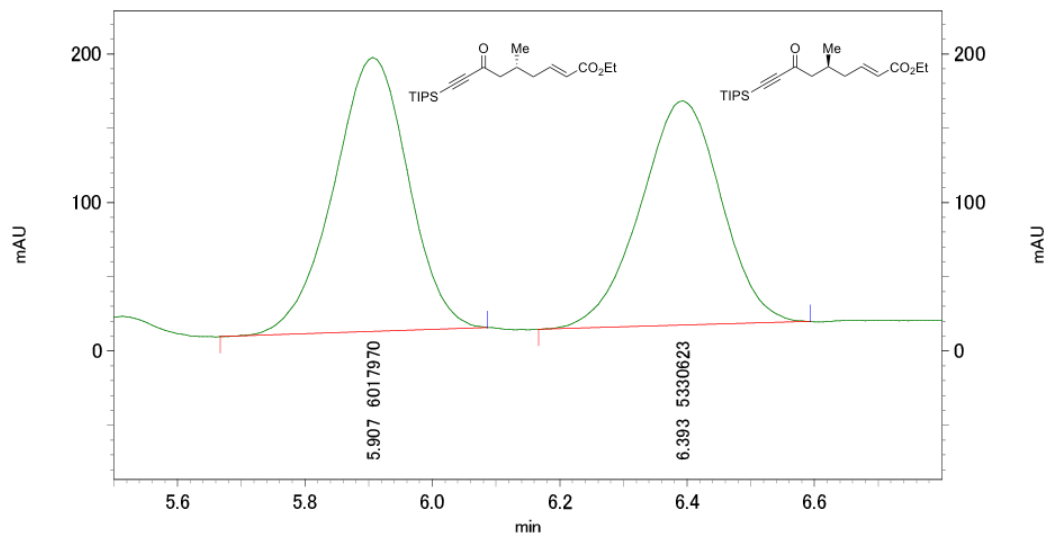

Result  
1: 213 nm, 4 nm 結果

| Pk #          | Retention time / min | Integration / % |
|---------------|----------------------|-----------------|
| 1             | 5.907                | 53.028          |
| 2             | 6.393                | 46.972          |
| トータル<br>Total |                      | 100.000         |



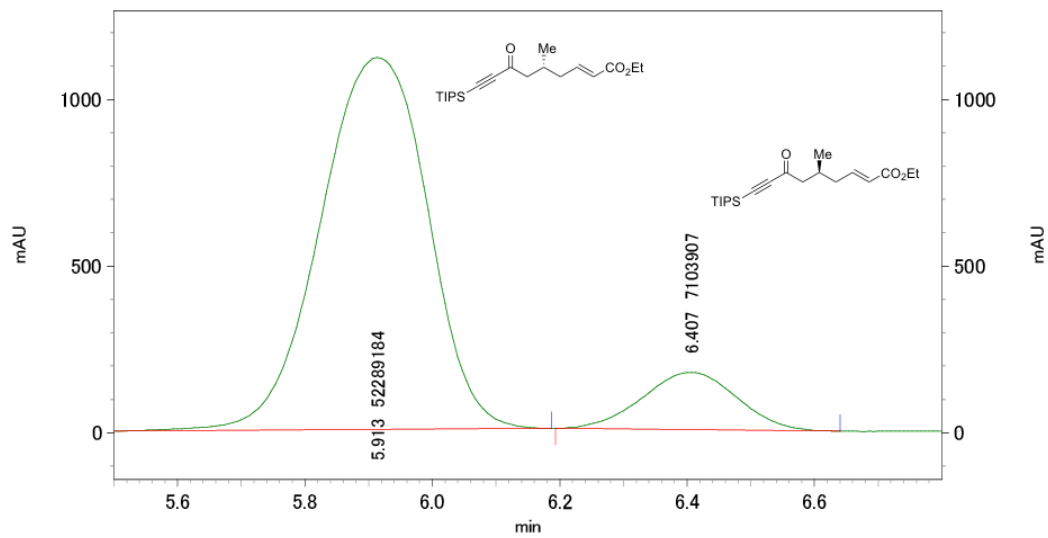

Result  
1: 213 nm, 4 nm 結果

| Pk #  | Retention time / min | Integration / % |
|-------|----------------------|-----------------|
| 1     | 5.913                | 88.039          |
| 2     | 6.407                | 11.961          |
| トータル  |                      | 100.000         |
| Total |                      |                 |

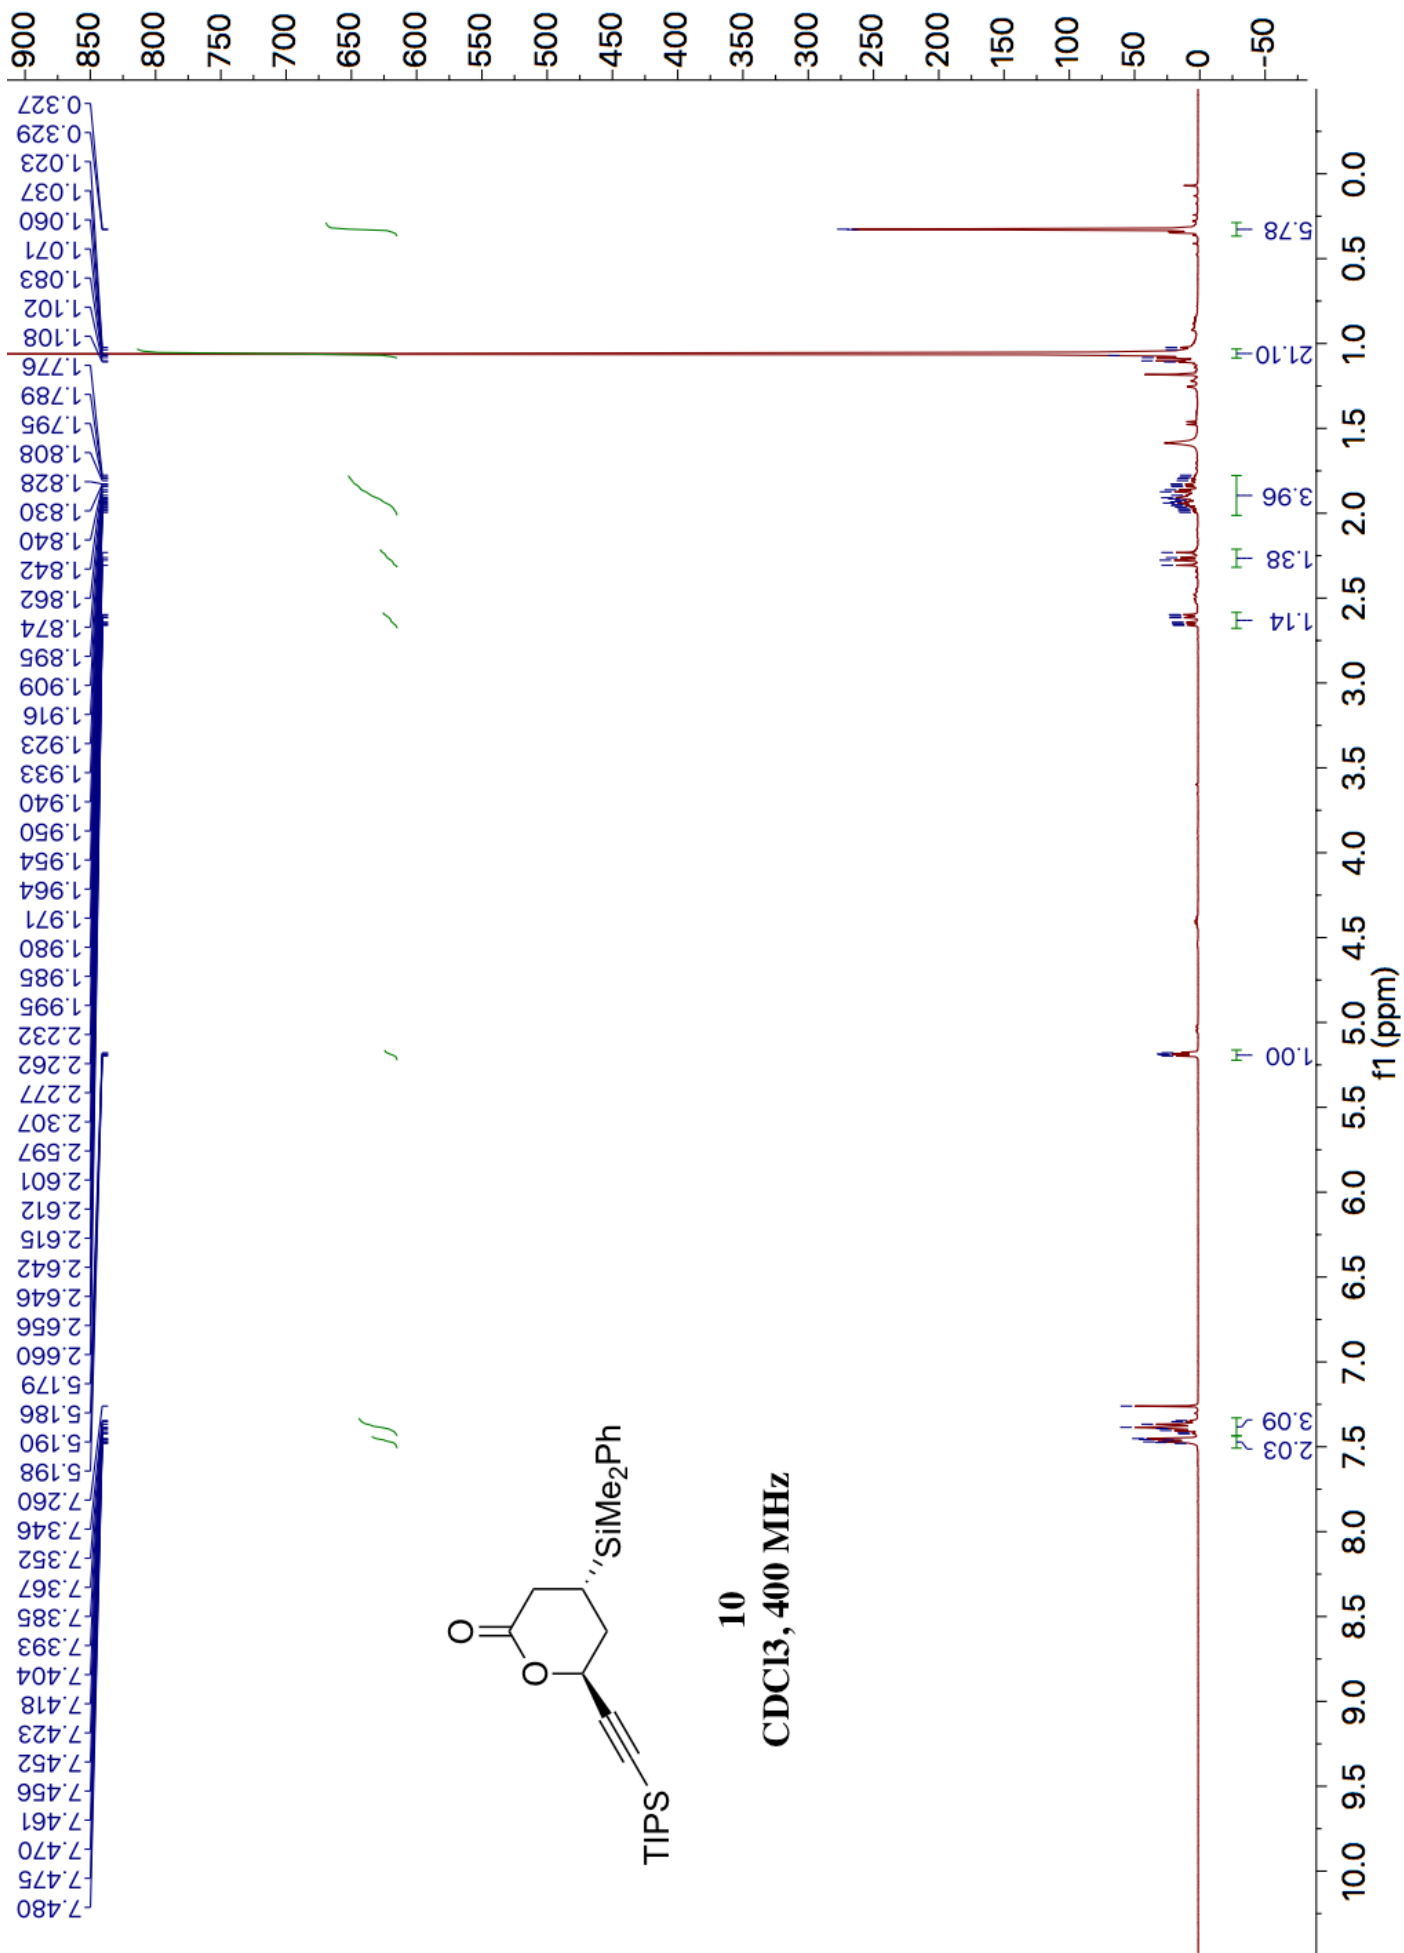

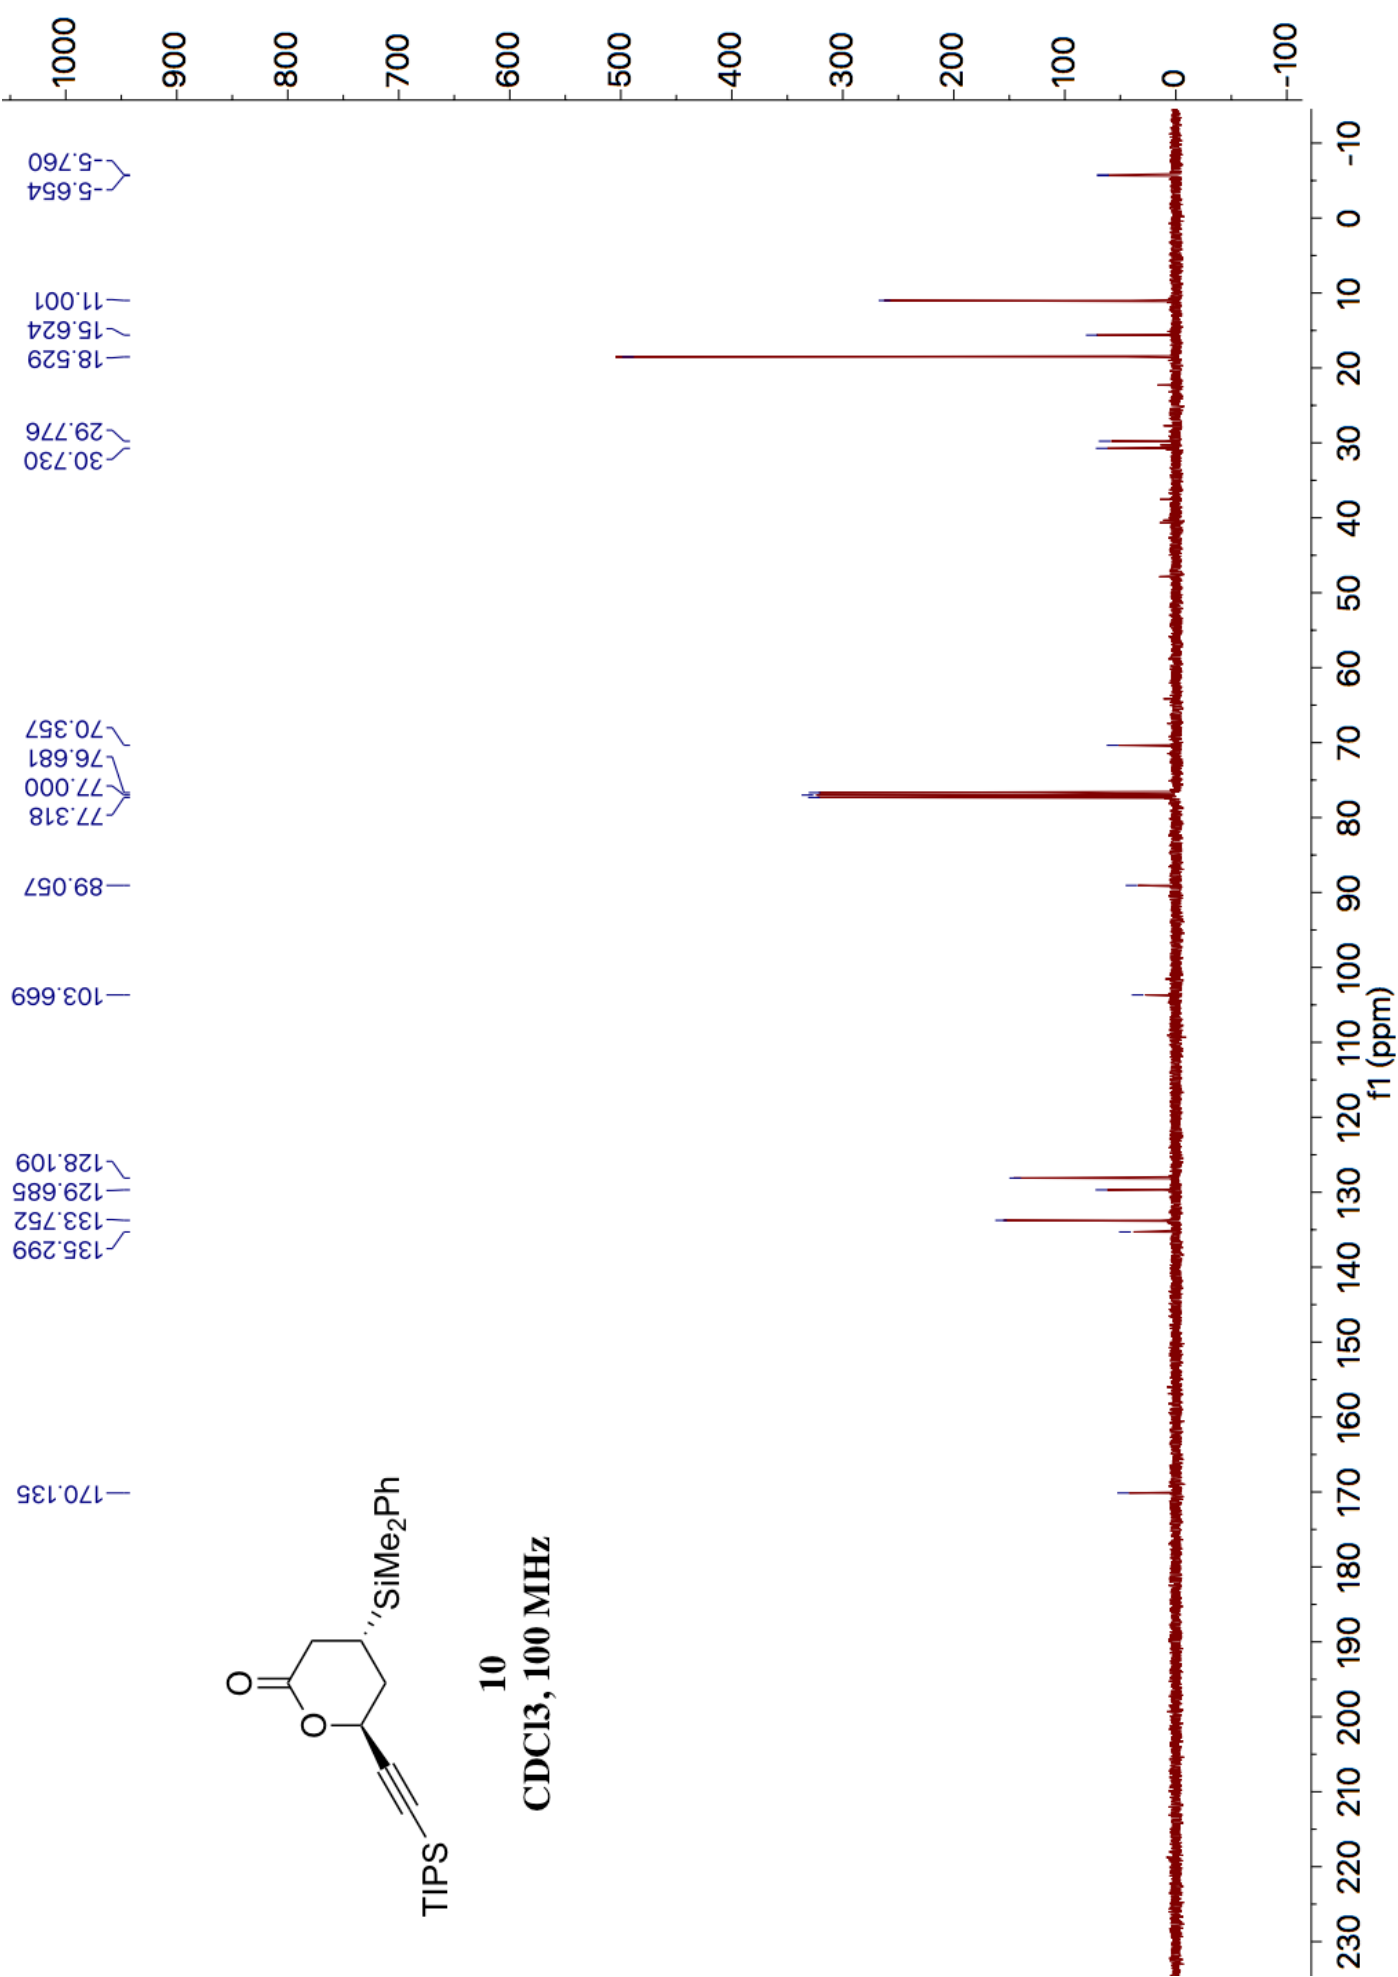

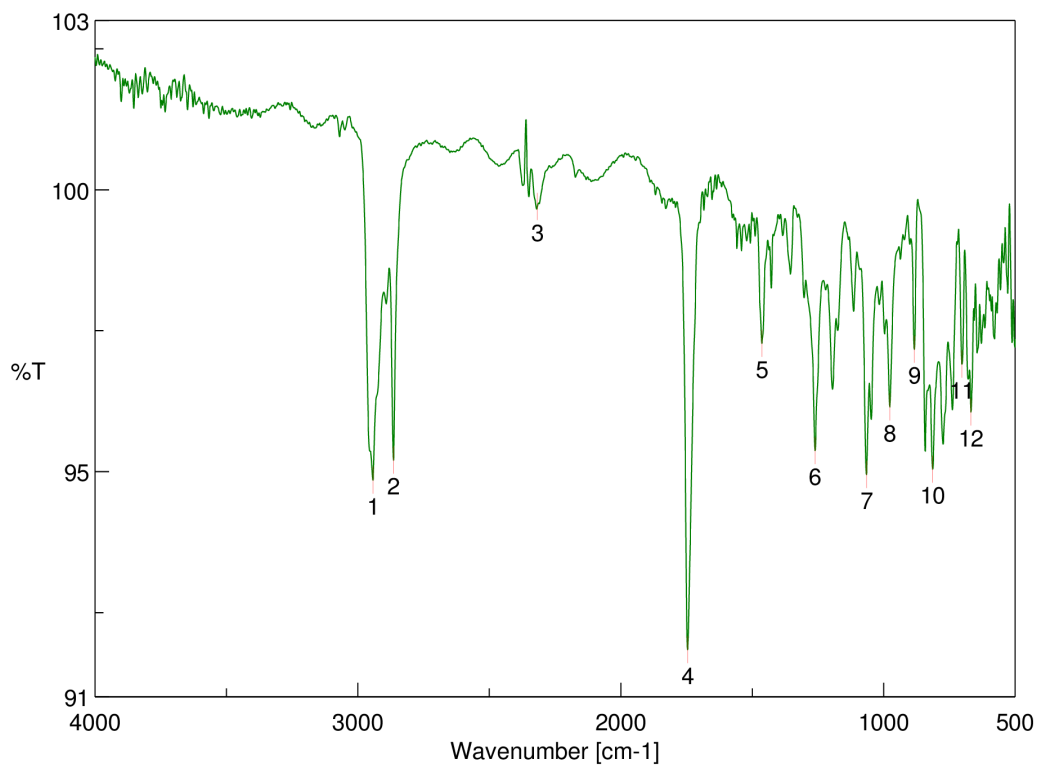

[ピーク検出結果]

| No. | 位置      | 強度      | No. | 位置      | 強度      |
|-----|---------|---------|-----|---------|---------|
| 1   | 2942.84 | 94.8446 | 2   | 2864.74 | 95.2006 |
| 3   | 2317.05 | 99.6995 | 4   | 1746.23 | 91.8394 |
| 5   | 1463.71 | 97.2725 | 6   | 1261.22 | 95.3701 |
| 7   | 1065.48 | 94.9429 | 8   | 976.769 | 96.146  |
| 9   | 883.238 | 97.1658 | 10  | 813.813 | 95.0414 |
| 11  | 701.962 | 96.9027 | 12  | 668.214 | 96.0529 |

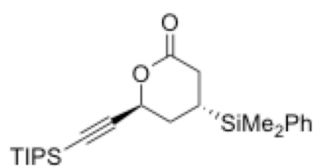

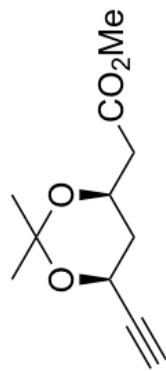

**6**  
CDCl<sub>3</sub>, 400 MHz

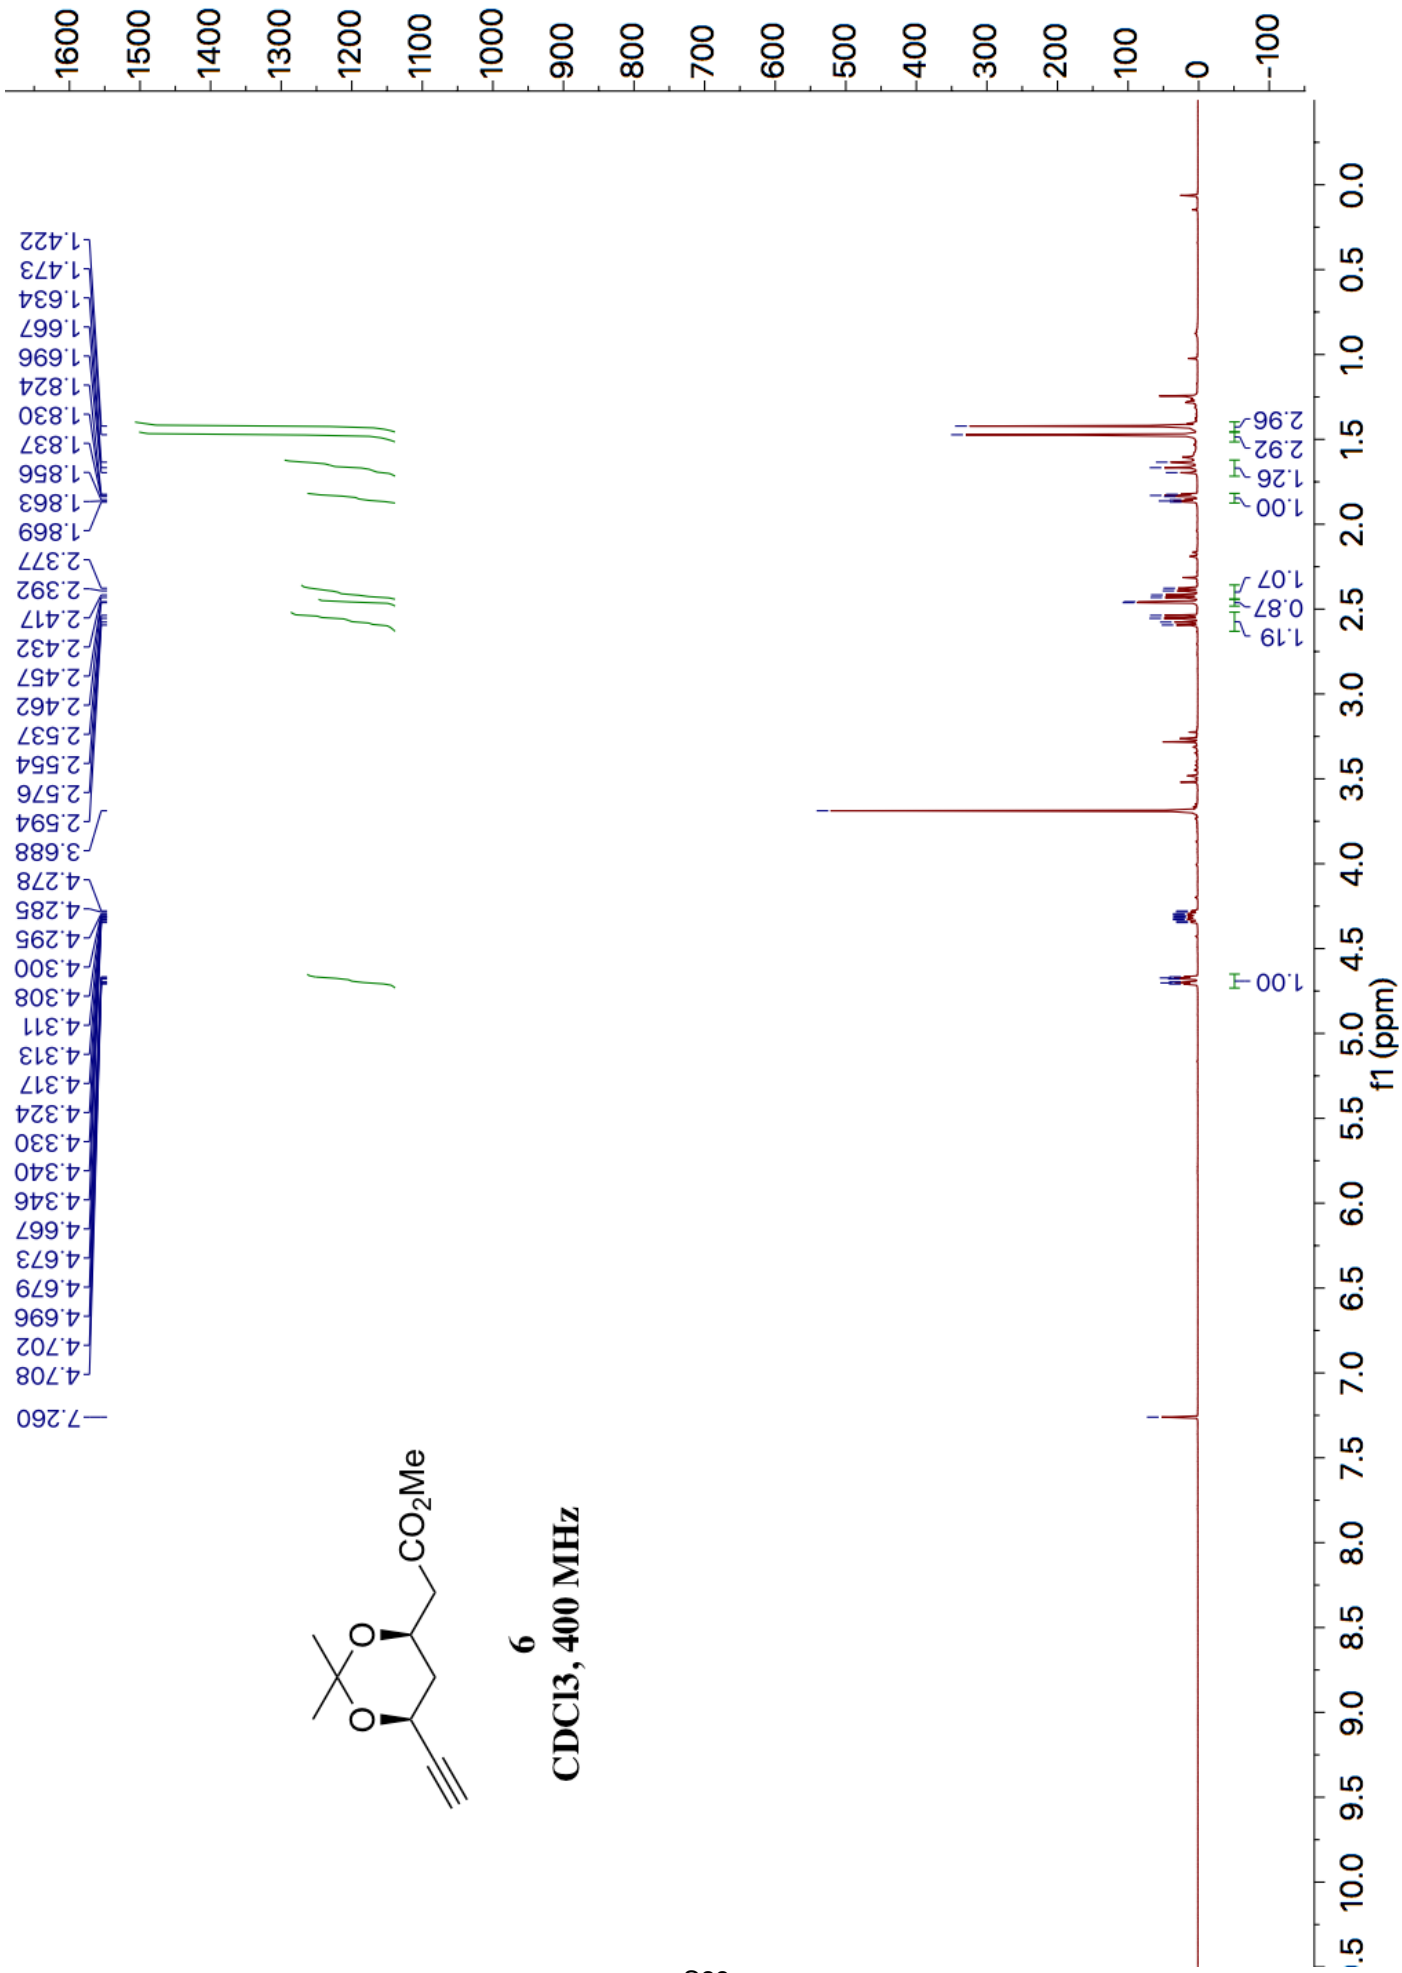

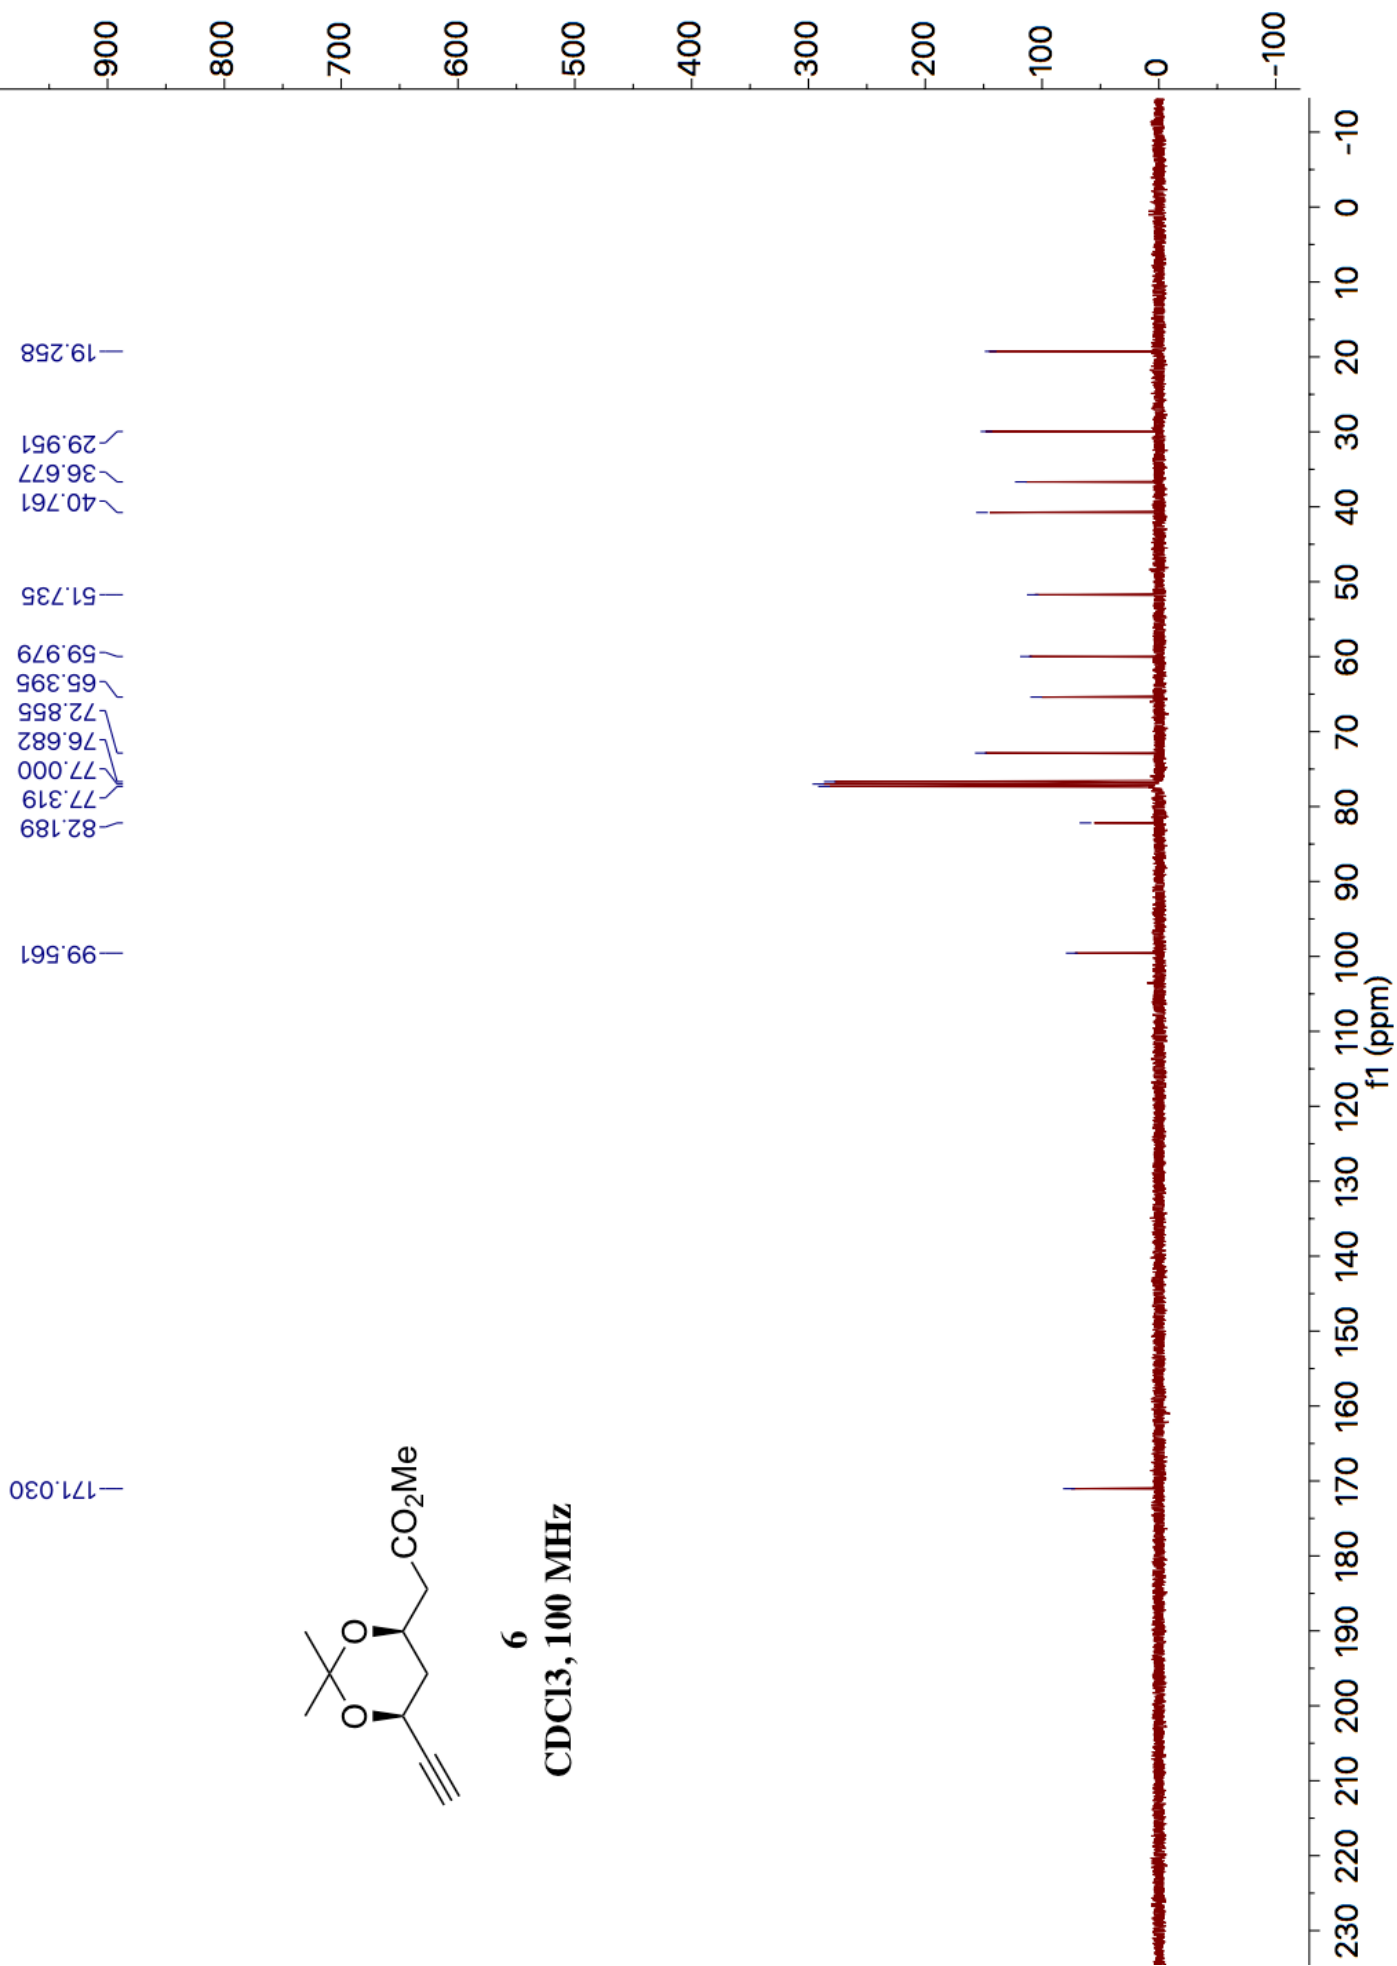

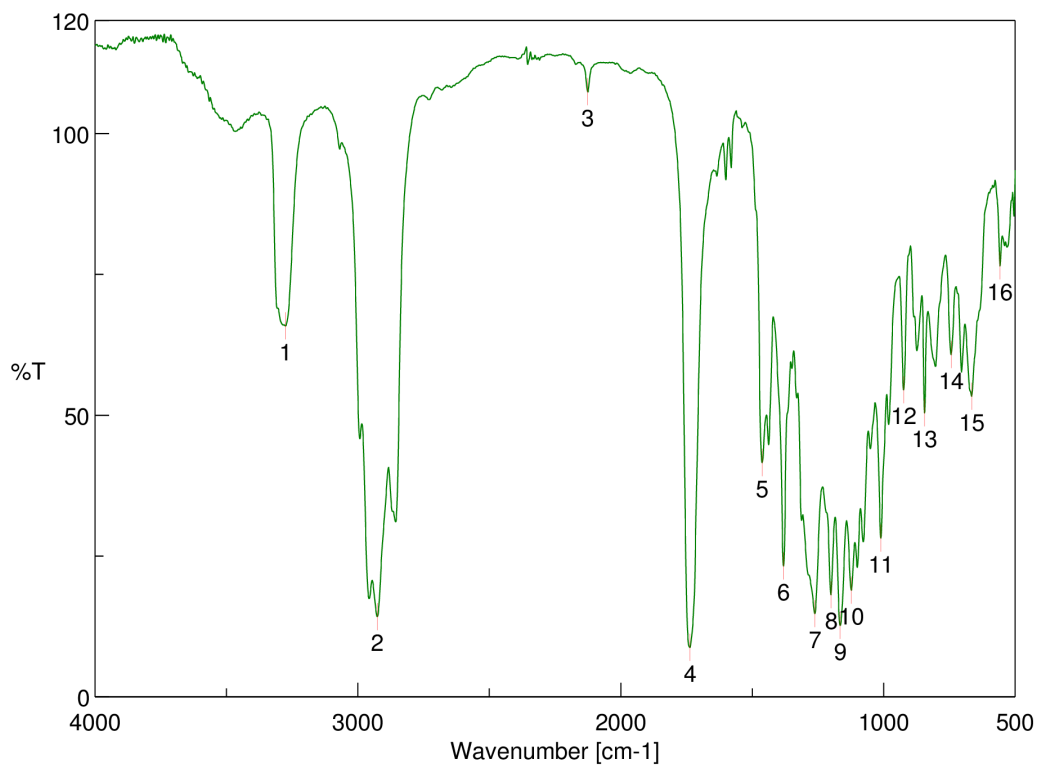

[ピーク検出結果]

| No. | 位置      | 強度      | No. | 位置      | 強度      |
|-----|---------|---------|-----|---------|---------|
| 1   | 3275.5  | 65.7972 | 2   | 2926.45 | 14.2363 |
| 3   | 2126.13 | 107.341 | 4   | 1737.55 | 8.77249 |
| 5   | 1462.74 | 41.5256 | 6   | 1380.78 | 23.2454 |
| 7   | 1262.18 | 14.8    | 8   | 1200.47 | 18.1388 |
| 9   | 1165.76 | 12.663  | 10  | 1123.33 | 18.9334 |
| 11  | 1010.52 | 28.1406 | 12  | 923.736 | 54.4708 |
| 13  | 844.669 | 50.3803 | 14  | 743.424 | 60.7057 |
| 15  | 665.321 | 53.3182 | 16  | 557.327 | 76.4504 |

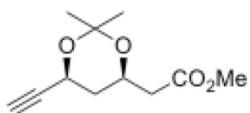

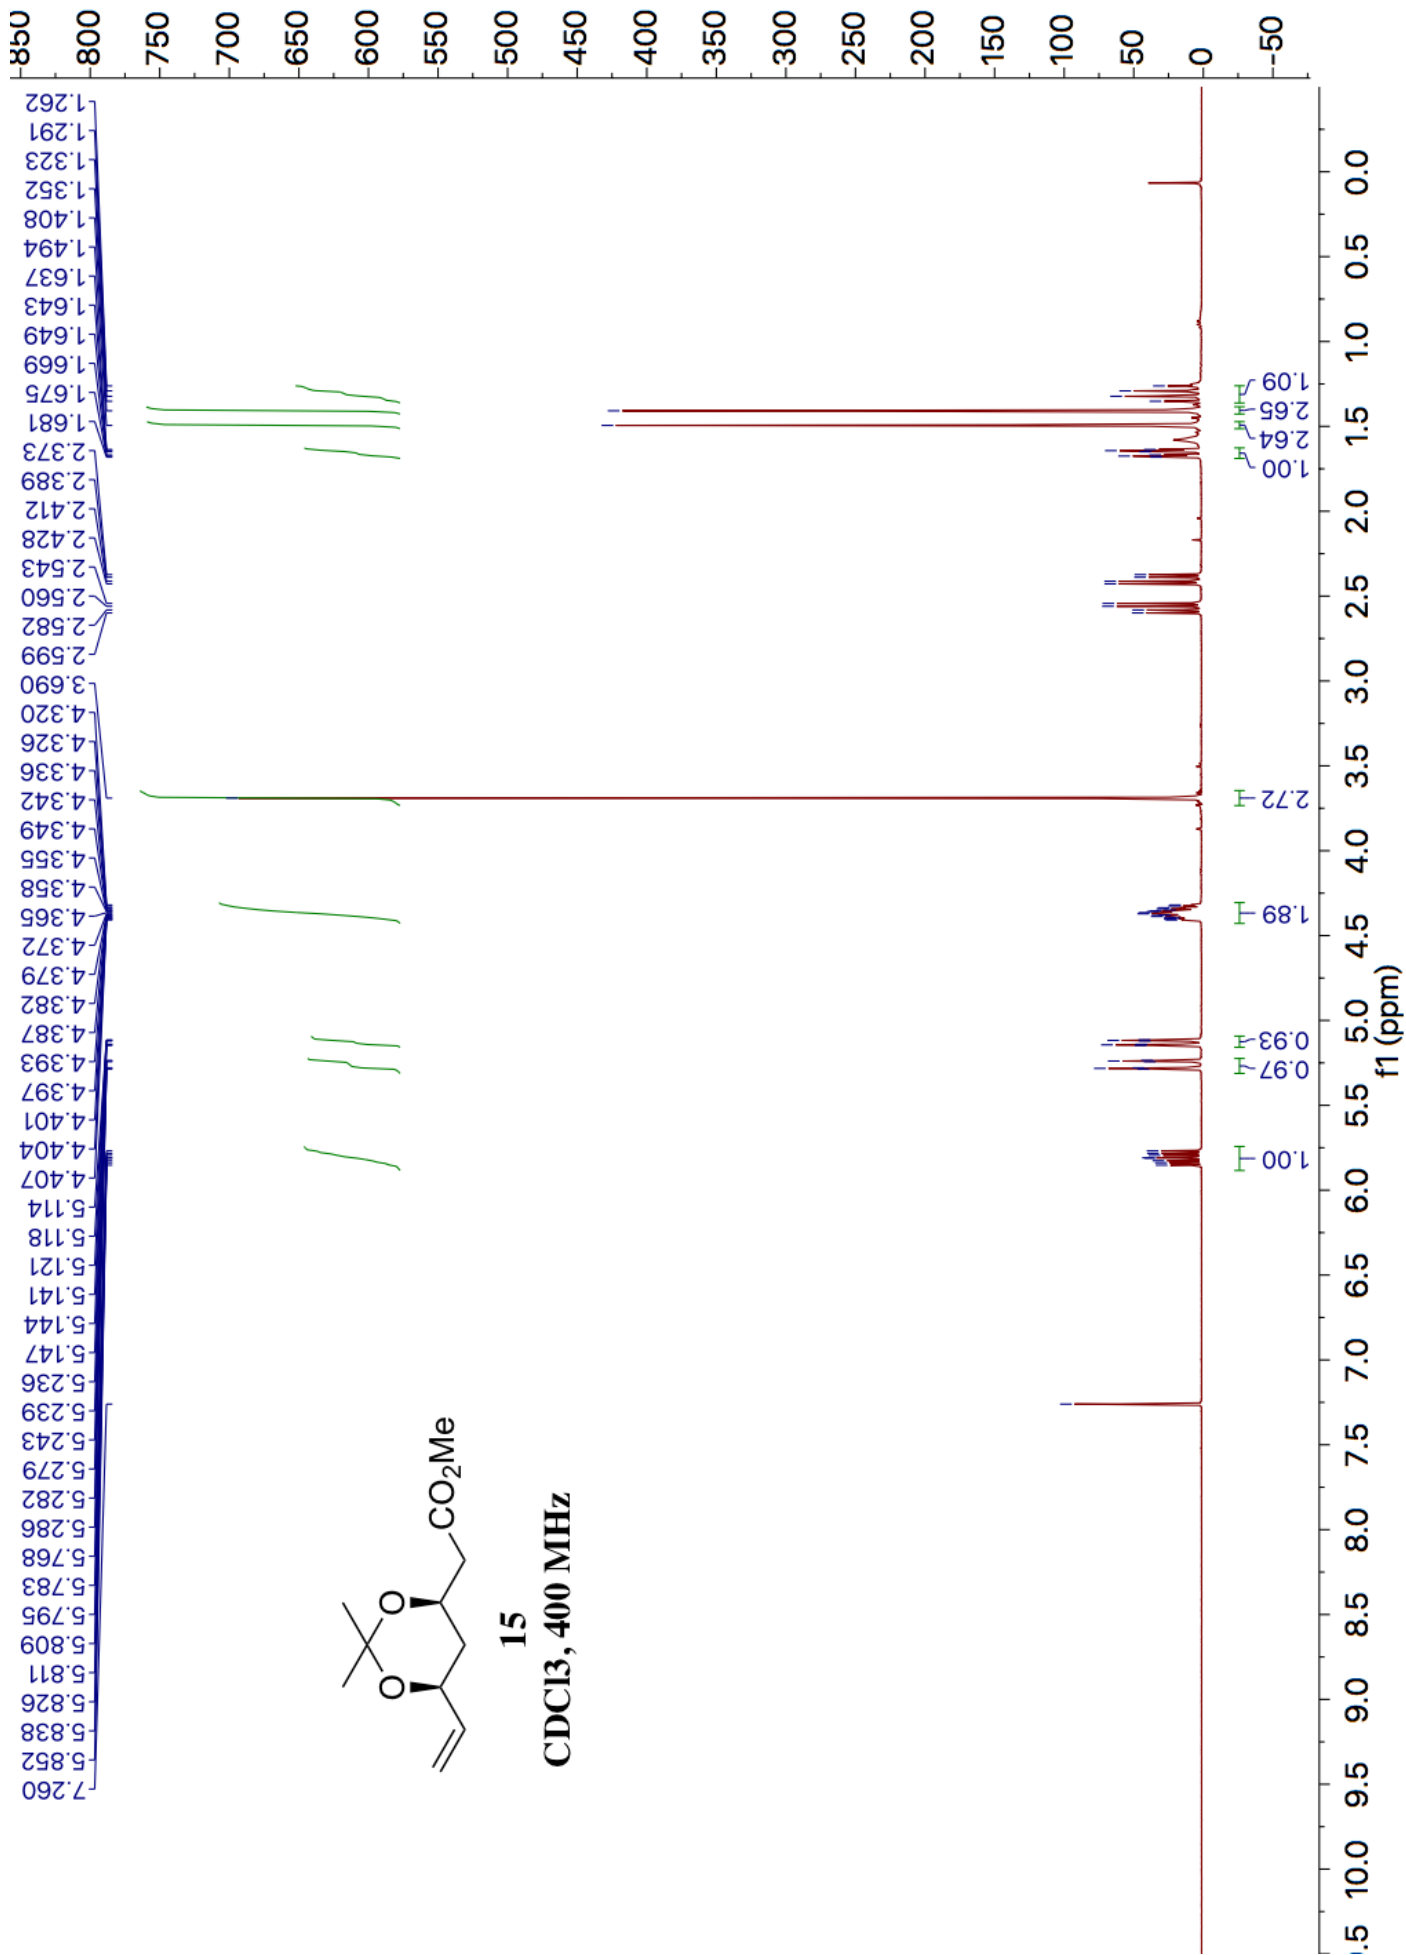



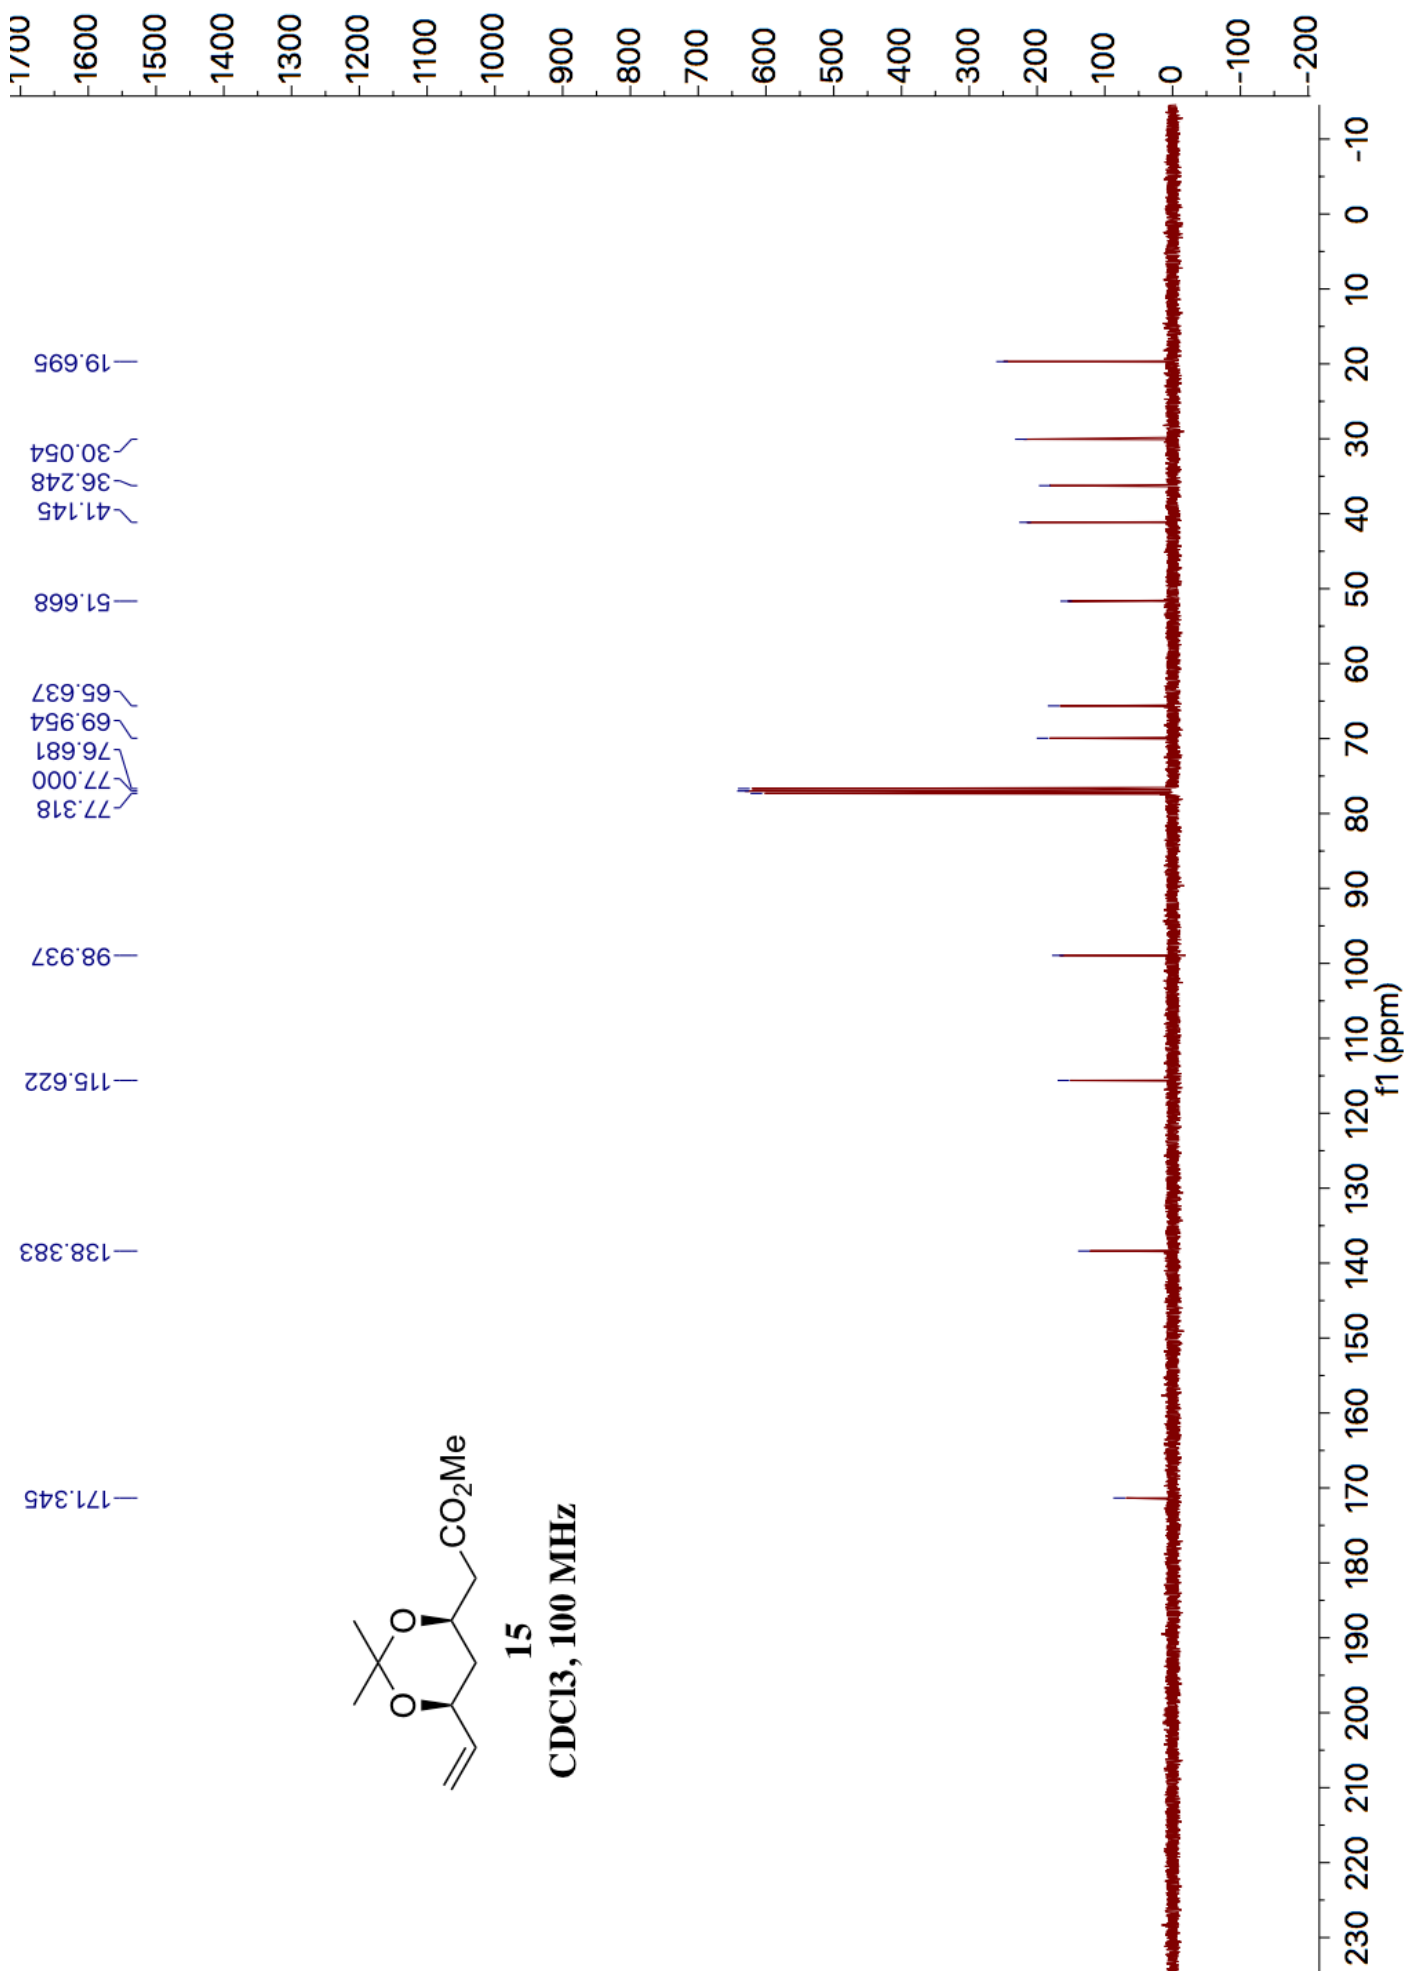

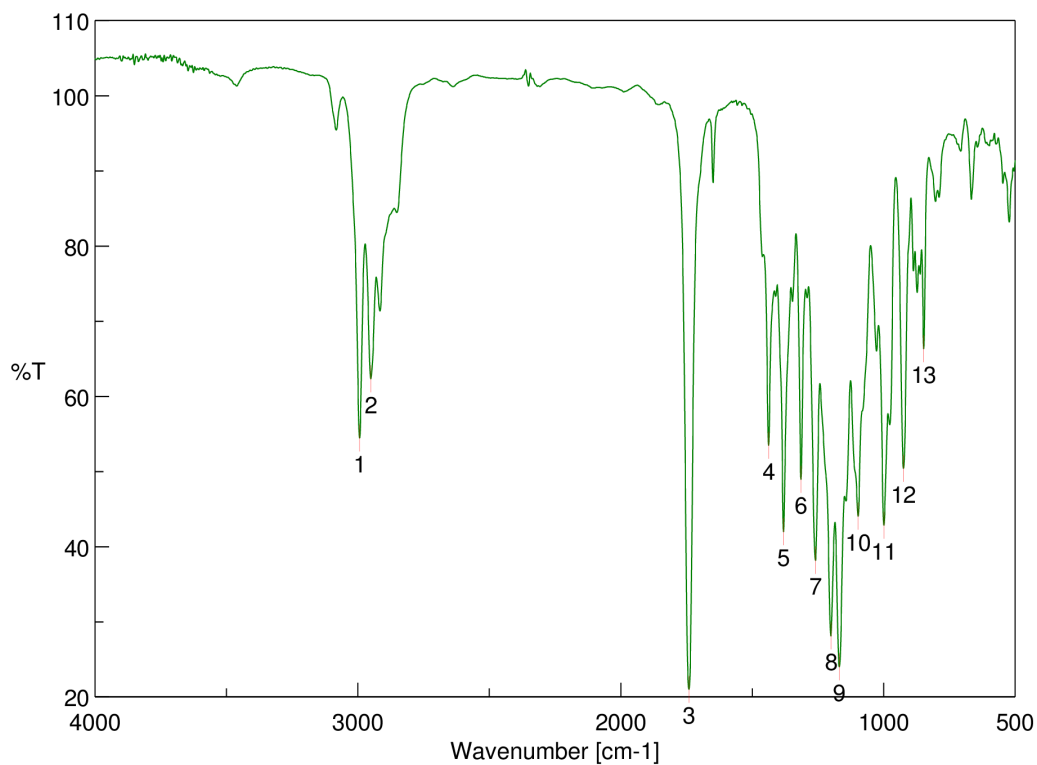

[ピーク検出結果]

| No. | 位置      | 強度      | No. | 位置      | 強度      |
|-----|---------|---------|-----|---------|---------|
| 1   | 2993.94 | 54.4669 | 2   | 2950.55 | 62.3311 |
| 3   | 1740.44 | 21.0265 | 4   | 1437.67 | 53.4662 |
| 5   | 1380.78 | 41.9869 | 6   | 1314.25 | 48.9695 |
| 7   | 1259.29 | 38.1736 | 8   | 1200.47 | 28.1254 |
| 9   | 1168.65 | 24.002  | 10  | 1097.3  | 44.0488 |
| 11  | 998.946 | 42.8603 | 12  | 924.7   | 50.4298 |
| 13  | 847.561 | 66.3477 |     |         |         |

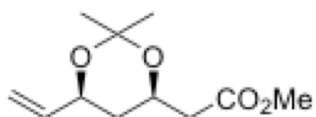

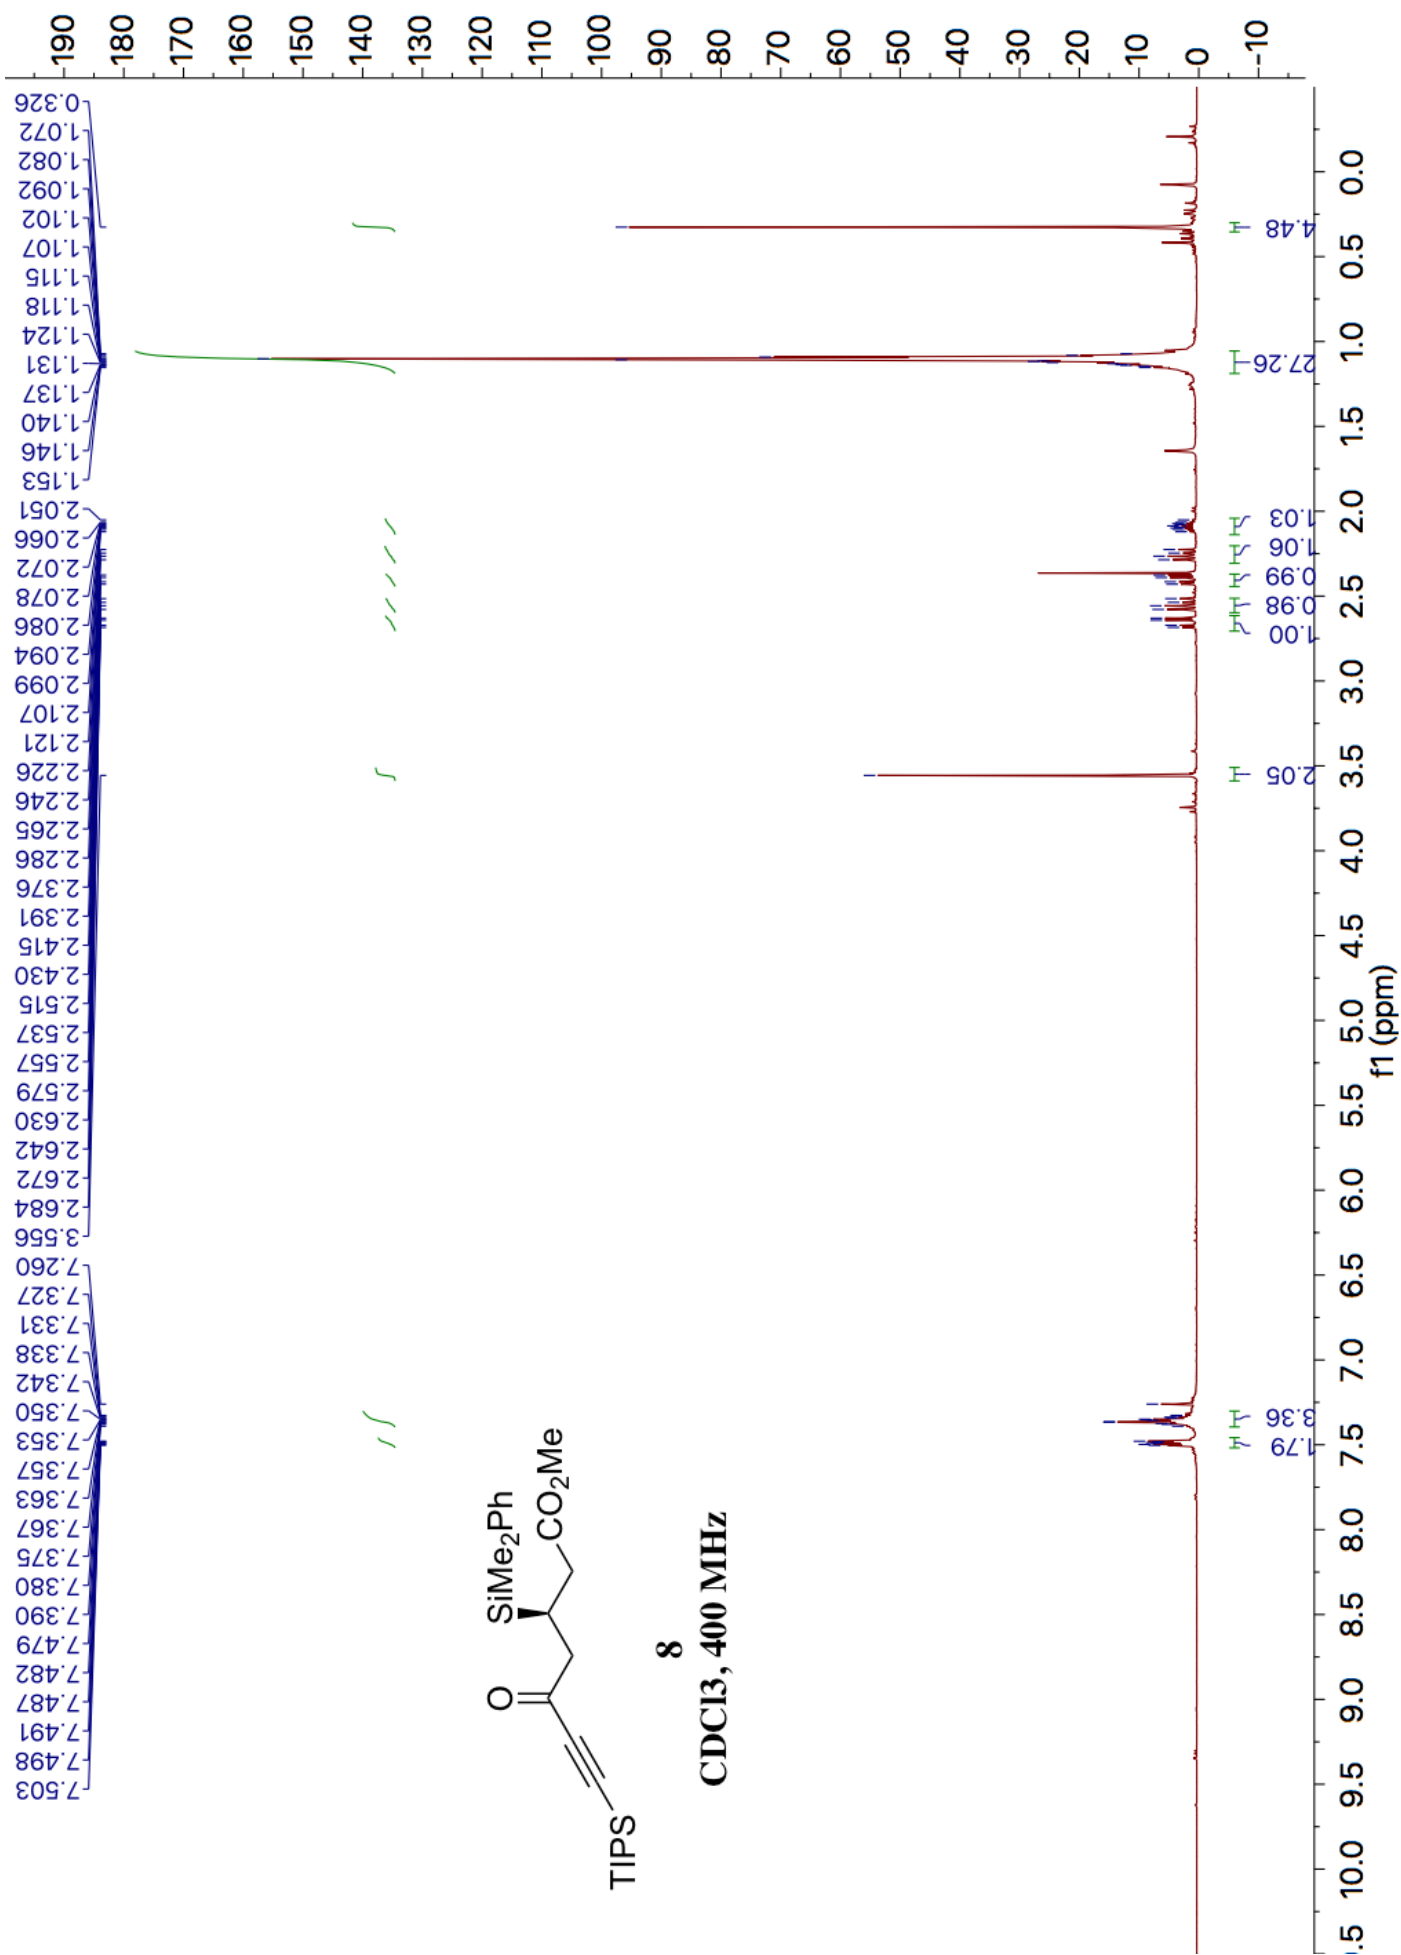

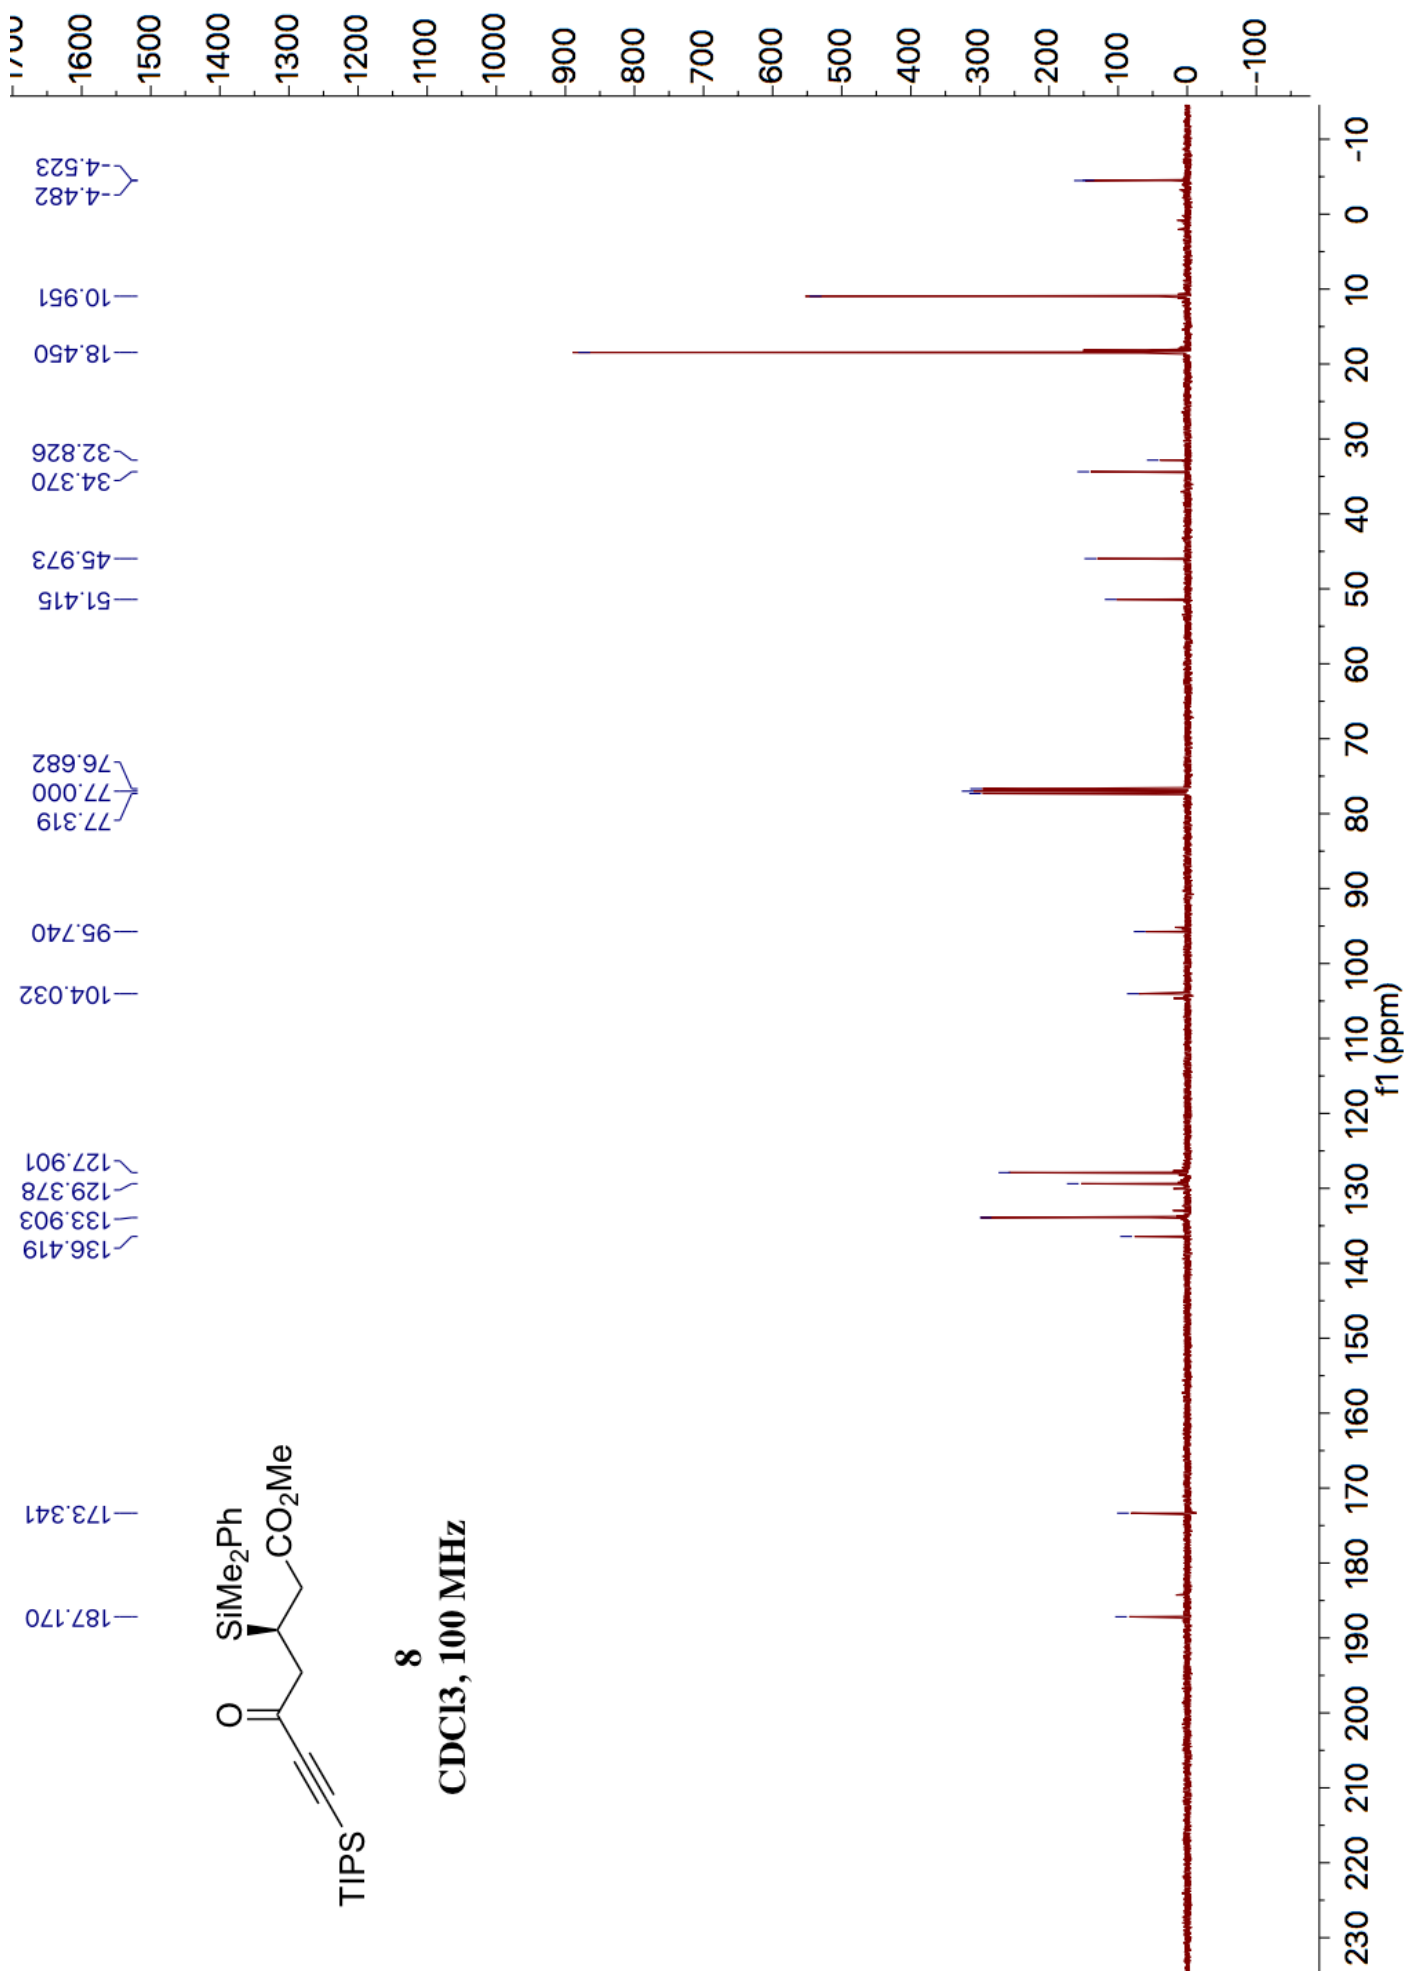

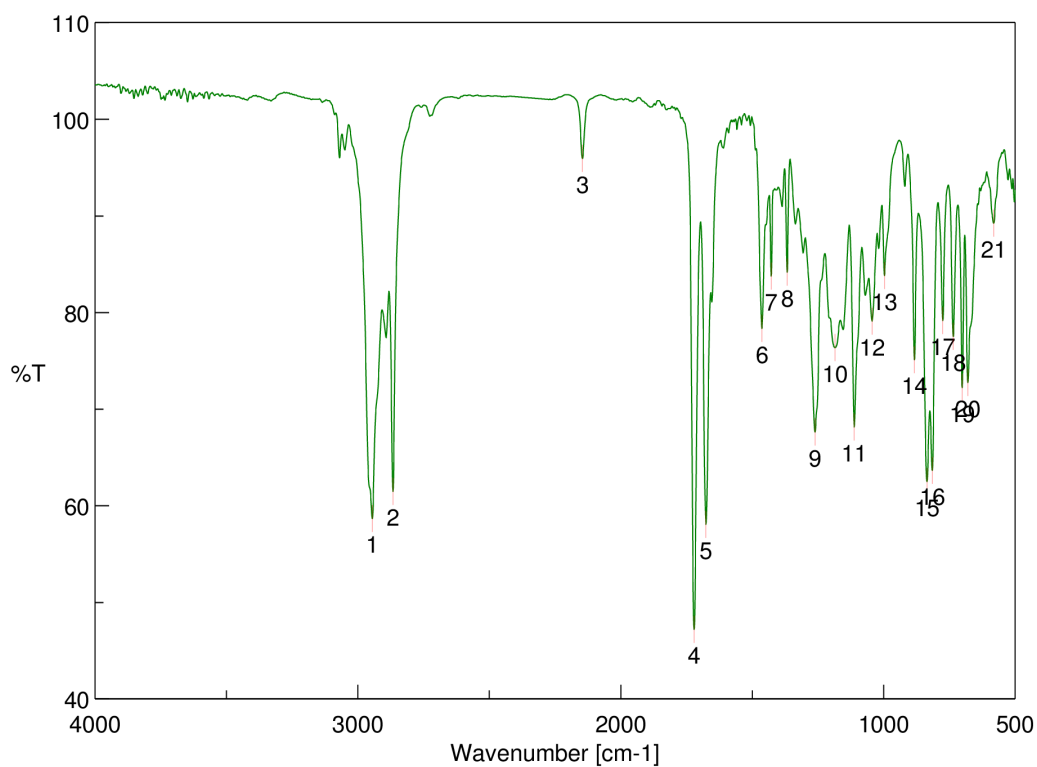

[ ピーク検出結果 ]

| No. | 位置      | 強度      | No. | 位置      | 強度      |
|-----|---------|---------|-----|---------|---------|
| 1   | 2945.73 | 58.6823 | 2   | 2866.67 | 61.4764 |
| 3   | 2146.38 | 95.9173 | 4   | 1721.16 | 47.1943 |
| 5   | 1675.84 | 58.0542 | 6   | 1463.71 | 78.3429 |
| 7   | 1428.03 | 83.7596 | 8   | 1367.28 | 84.1687 |
| 9   | 1261.22 | 67.6144 | 10  | 1185.04 | 76.3495 |
| 11  | 1111.76 | 68.1392 | 12  | 1044.26 | 79.1067 |
| 13  | 997.017 | 83.8152 | 14  | 883.238 | 75.1082 |
| 15  | 835.026 | 62.4803 | 16  | 814.777 | 63.6394 |
| 17  | 775.244 | 79.1549 | 18  | 735.71  | 77.5064 |
| 19  | 700.998 | 72.2065 | 20  | 679.785 | 72.7306 |
| 21  | 581.433 | 89.2305 |     |         |         |

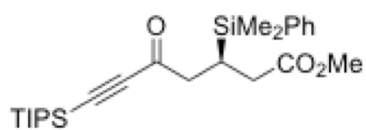

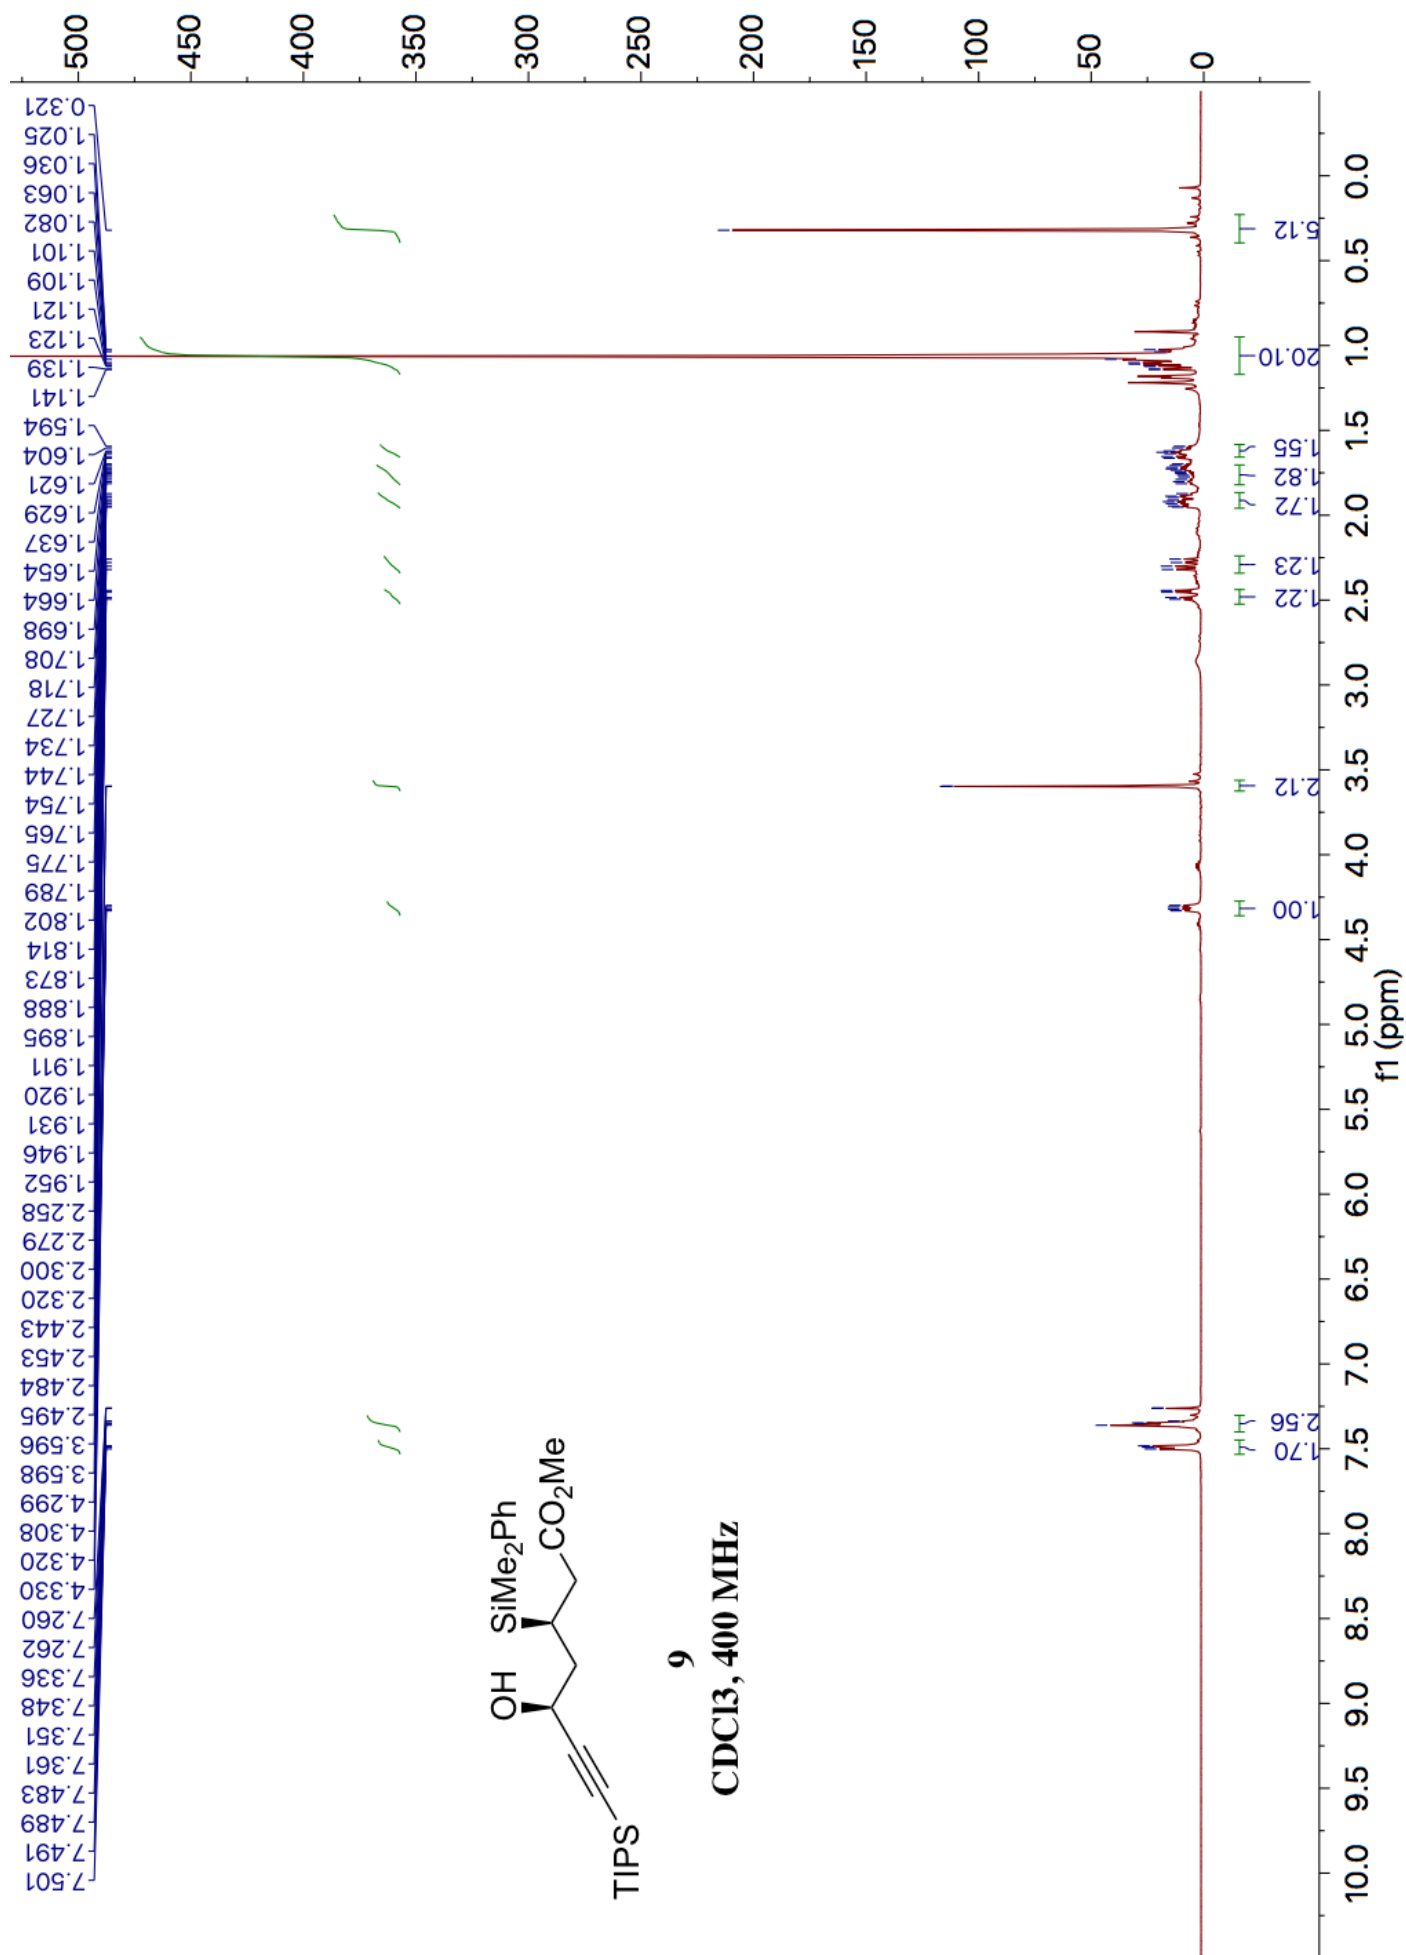

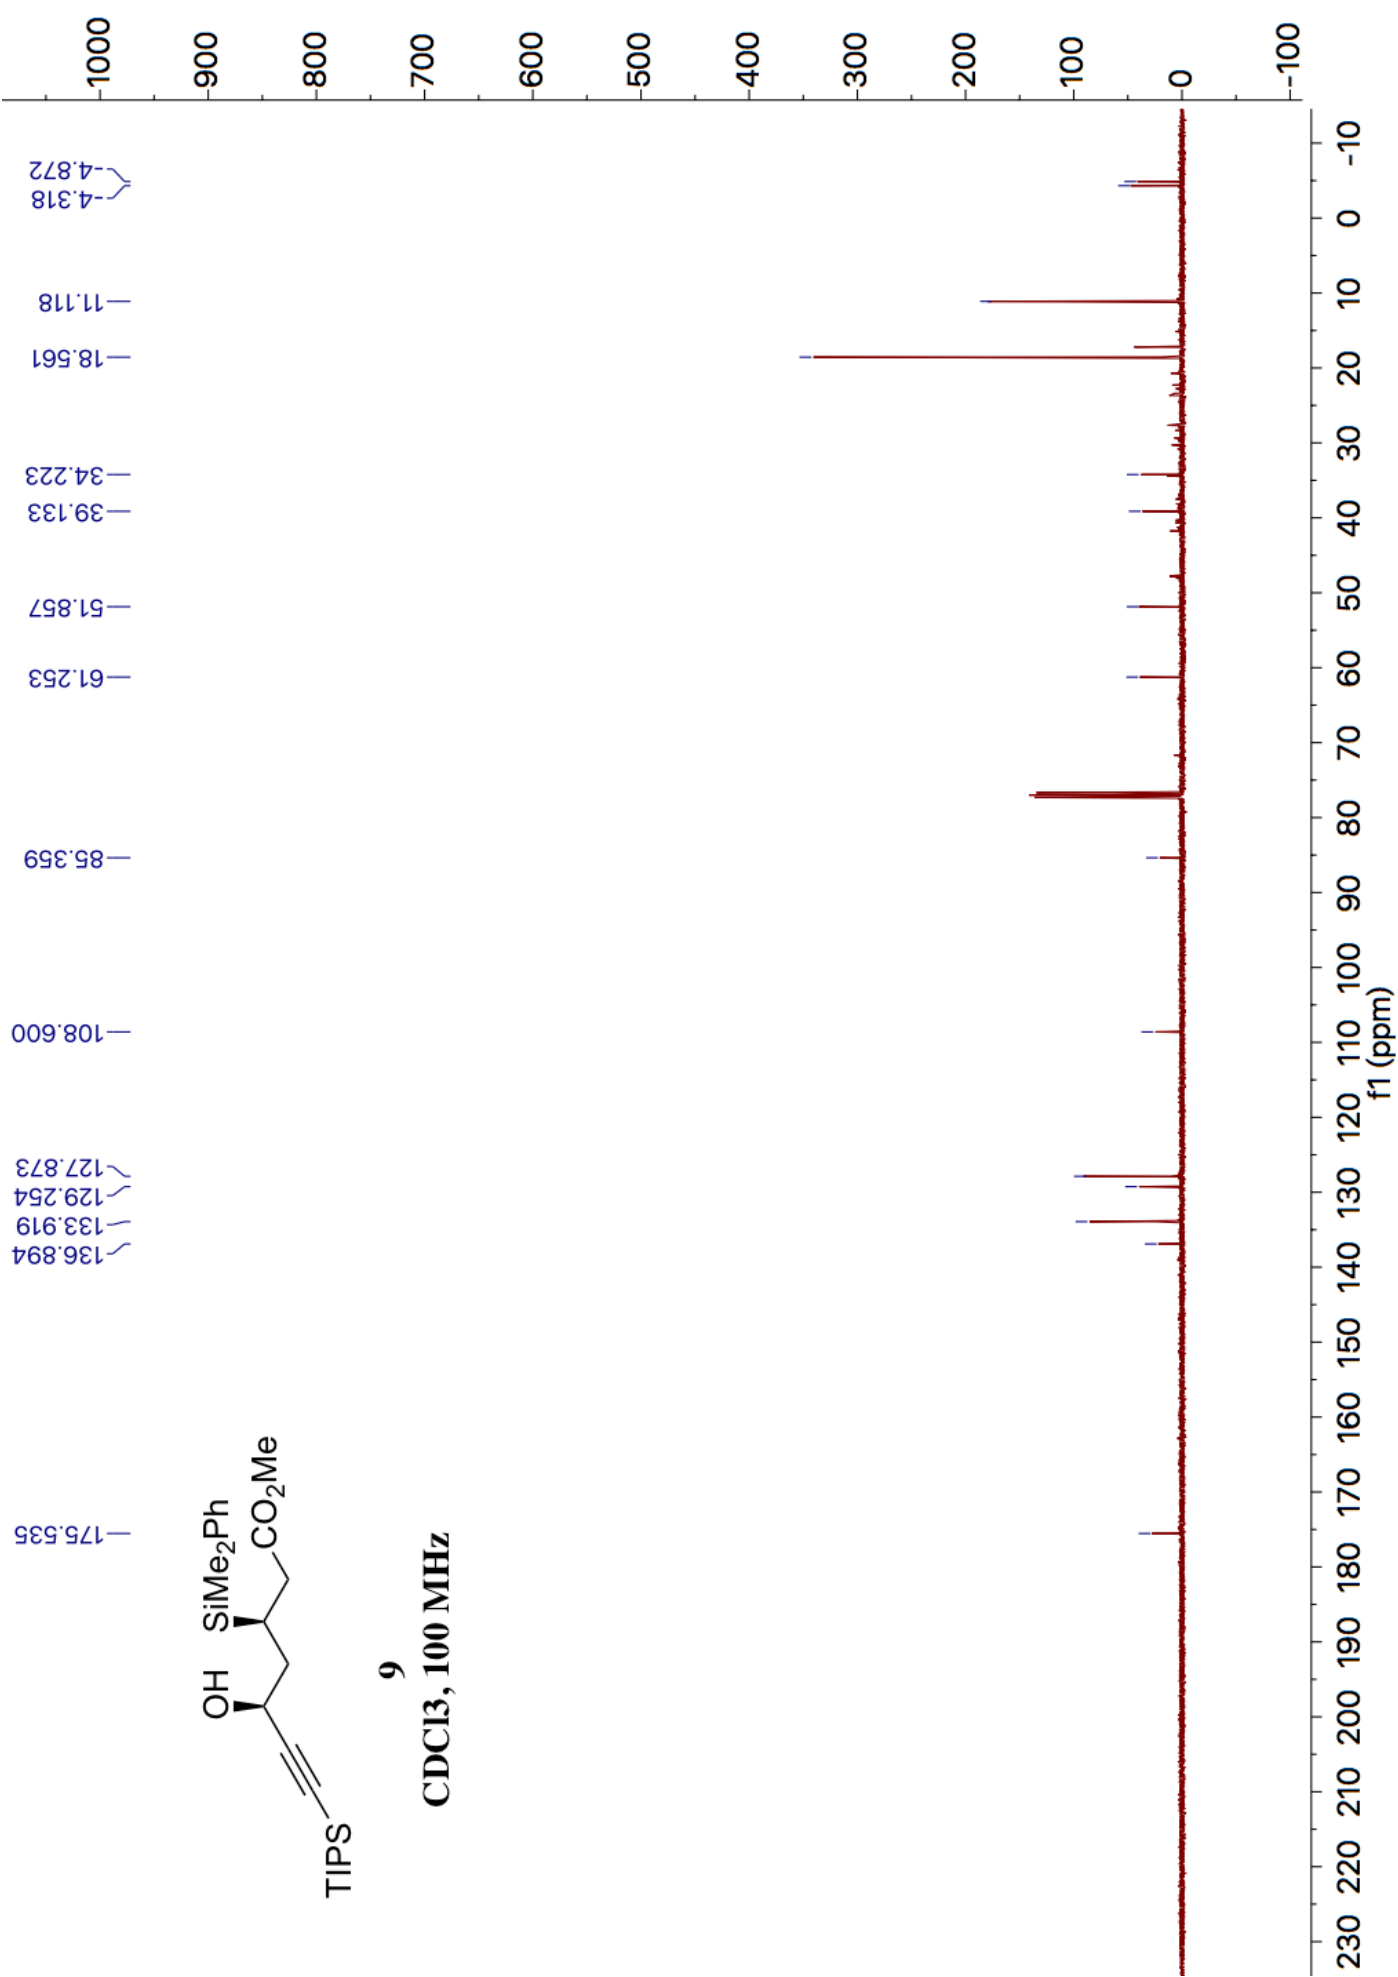

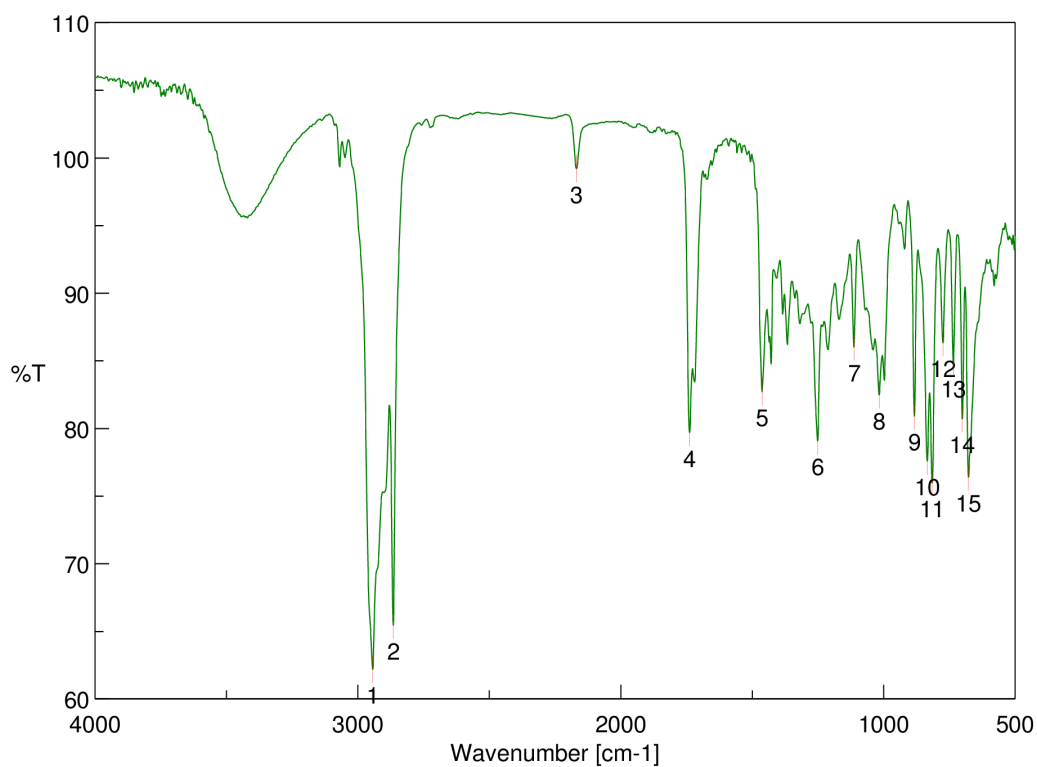

[ピーク検出結果]

| No. | 位置      | 強度      | No. | 位置      | 強度      |
|-----|---------|---------|-----|---------|---------|
| 1   | 2943.8  | 62.1929 | 2   | 2865.7  | 65.4572 |
| 3   | 2168.56 | 99.2111 | 4   | 1738.51 | 79.6888 |
| 5   | 1462.74 | 82.6987 | 6   | 1251.58 | 79.0866 |
| 7   | 1112.73 | 86.0092 | 8   | 1017.27 | 82.4702 |
| 9   | 883.238 | 80.9175 | 10  | 834.062 | 77.581  |
| 11  | 815.742 | 75.9845 | 12  | 774.279 | 86.3283 |
| 13  | 734.746 | 84.8487 | 14  | 700.998 | 80.6979 |
| 15  | 677.856 | 76.3981 |     |         |         |

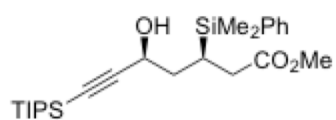



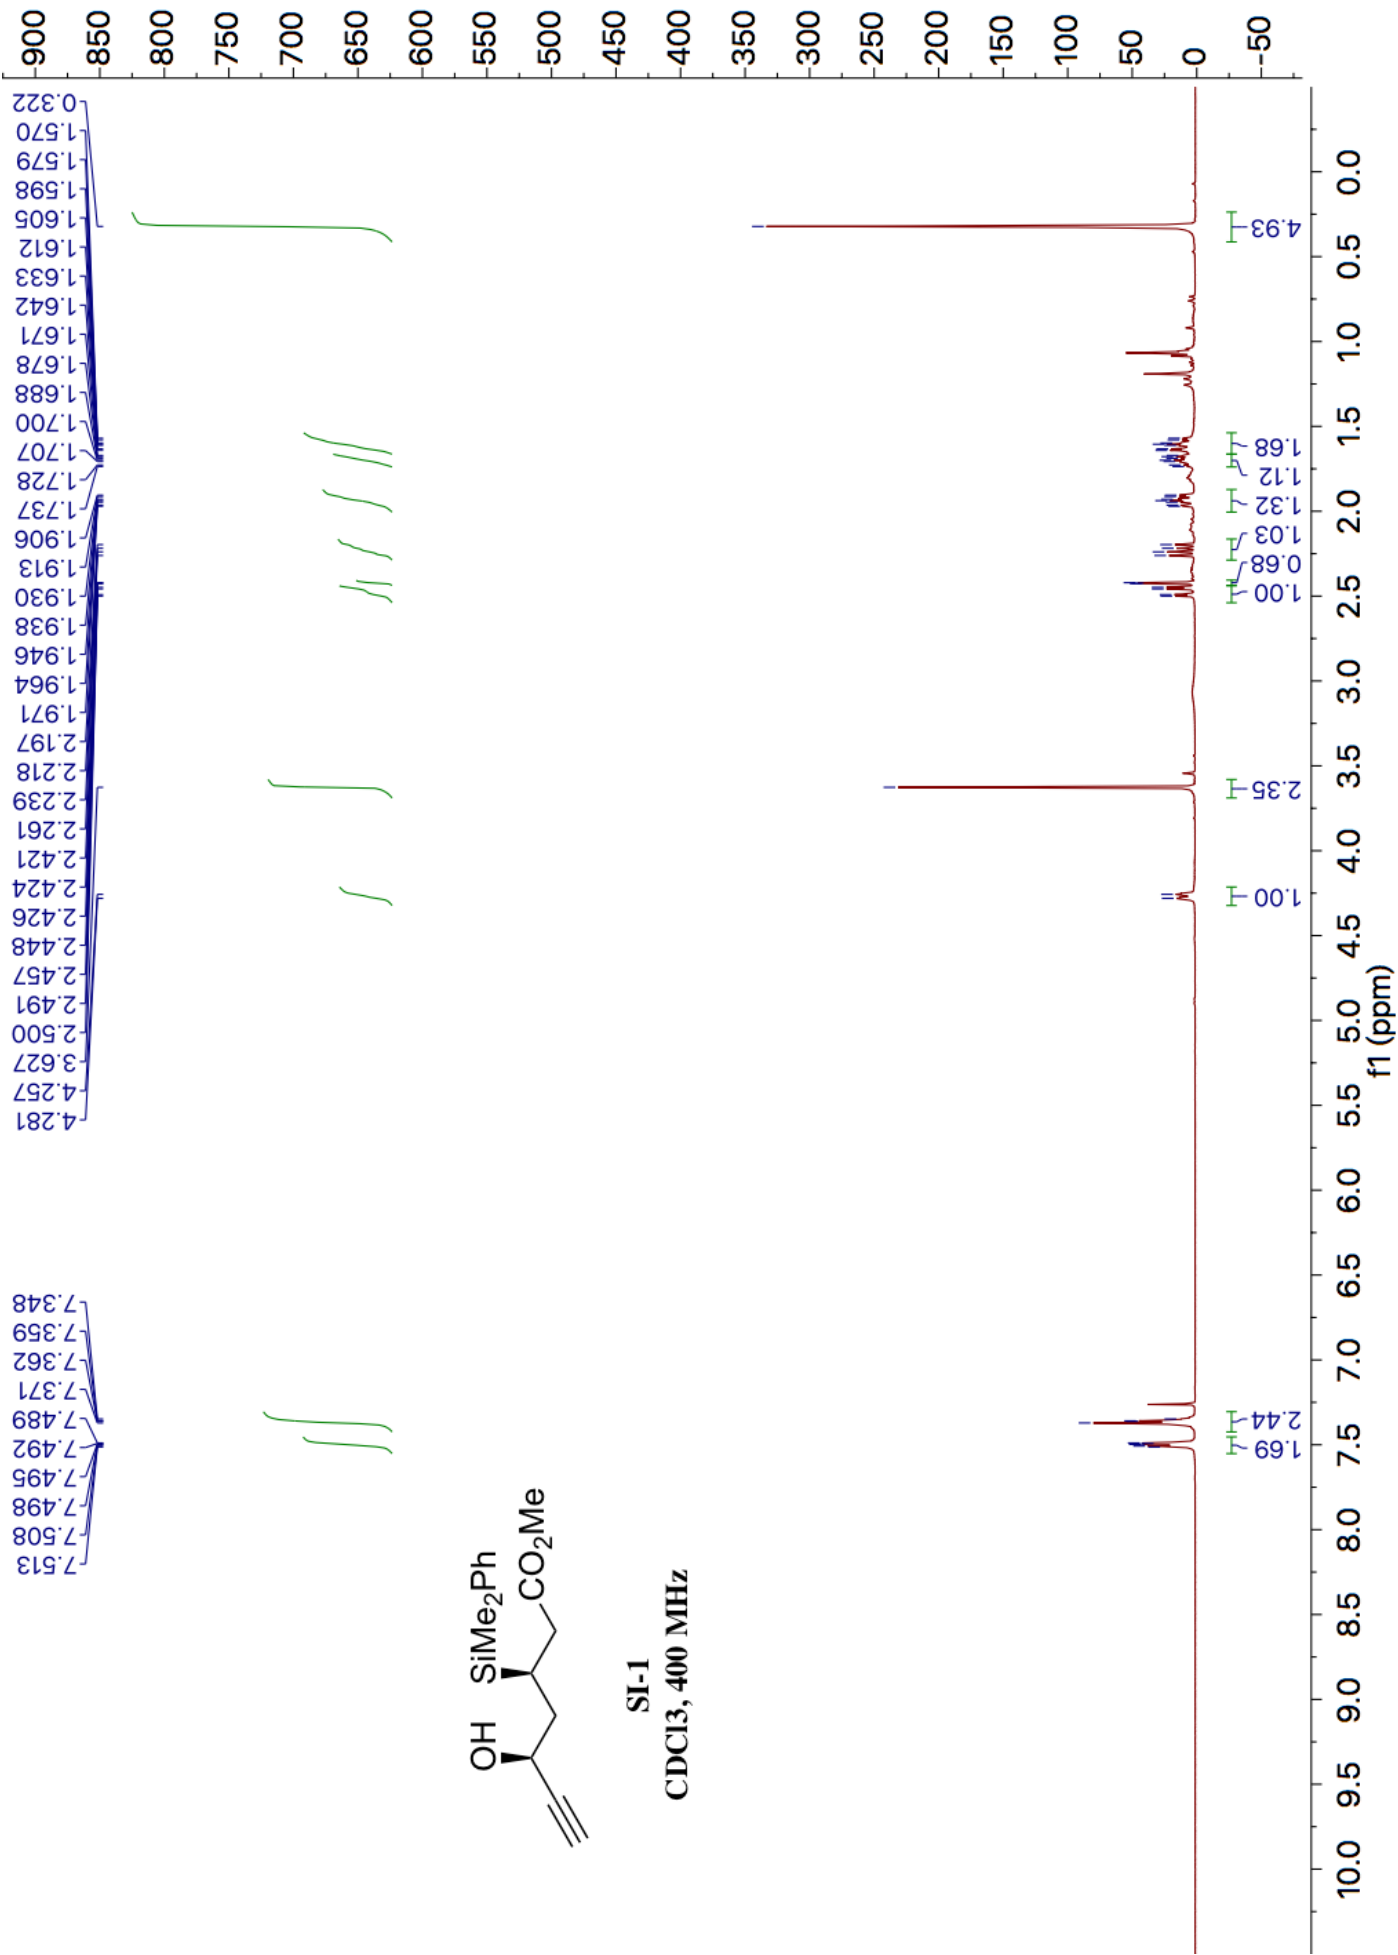

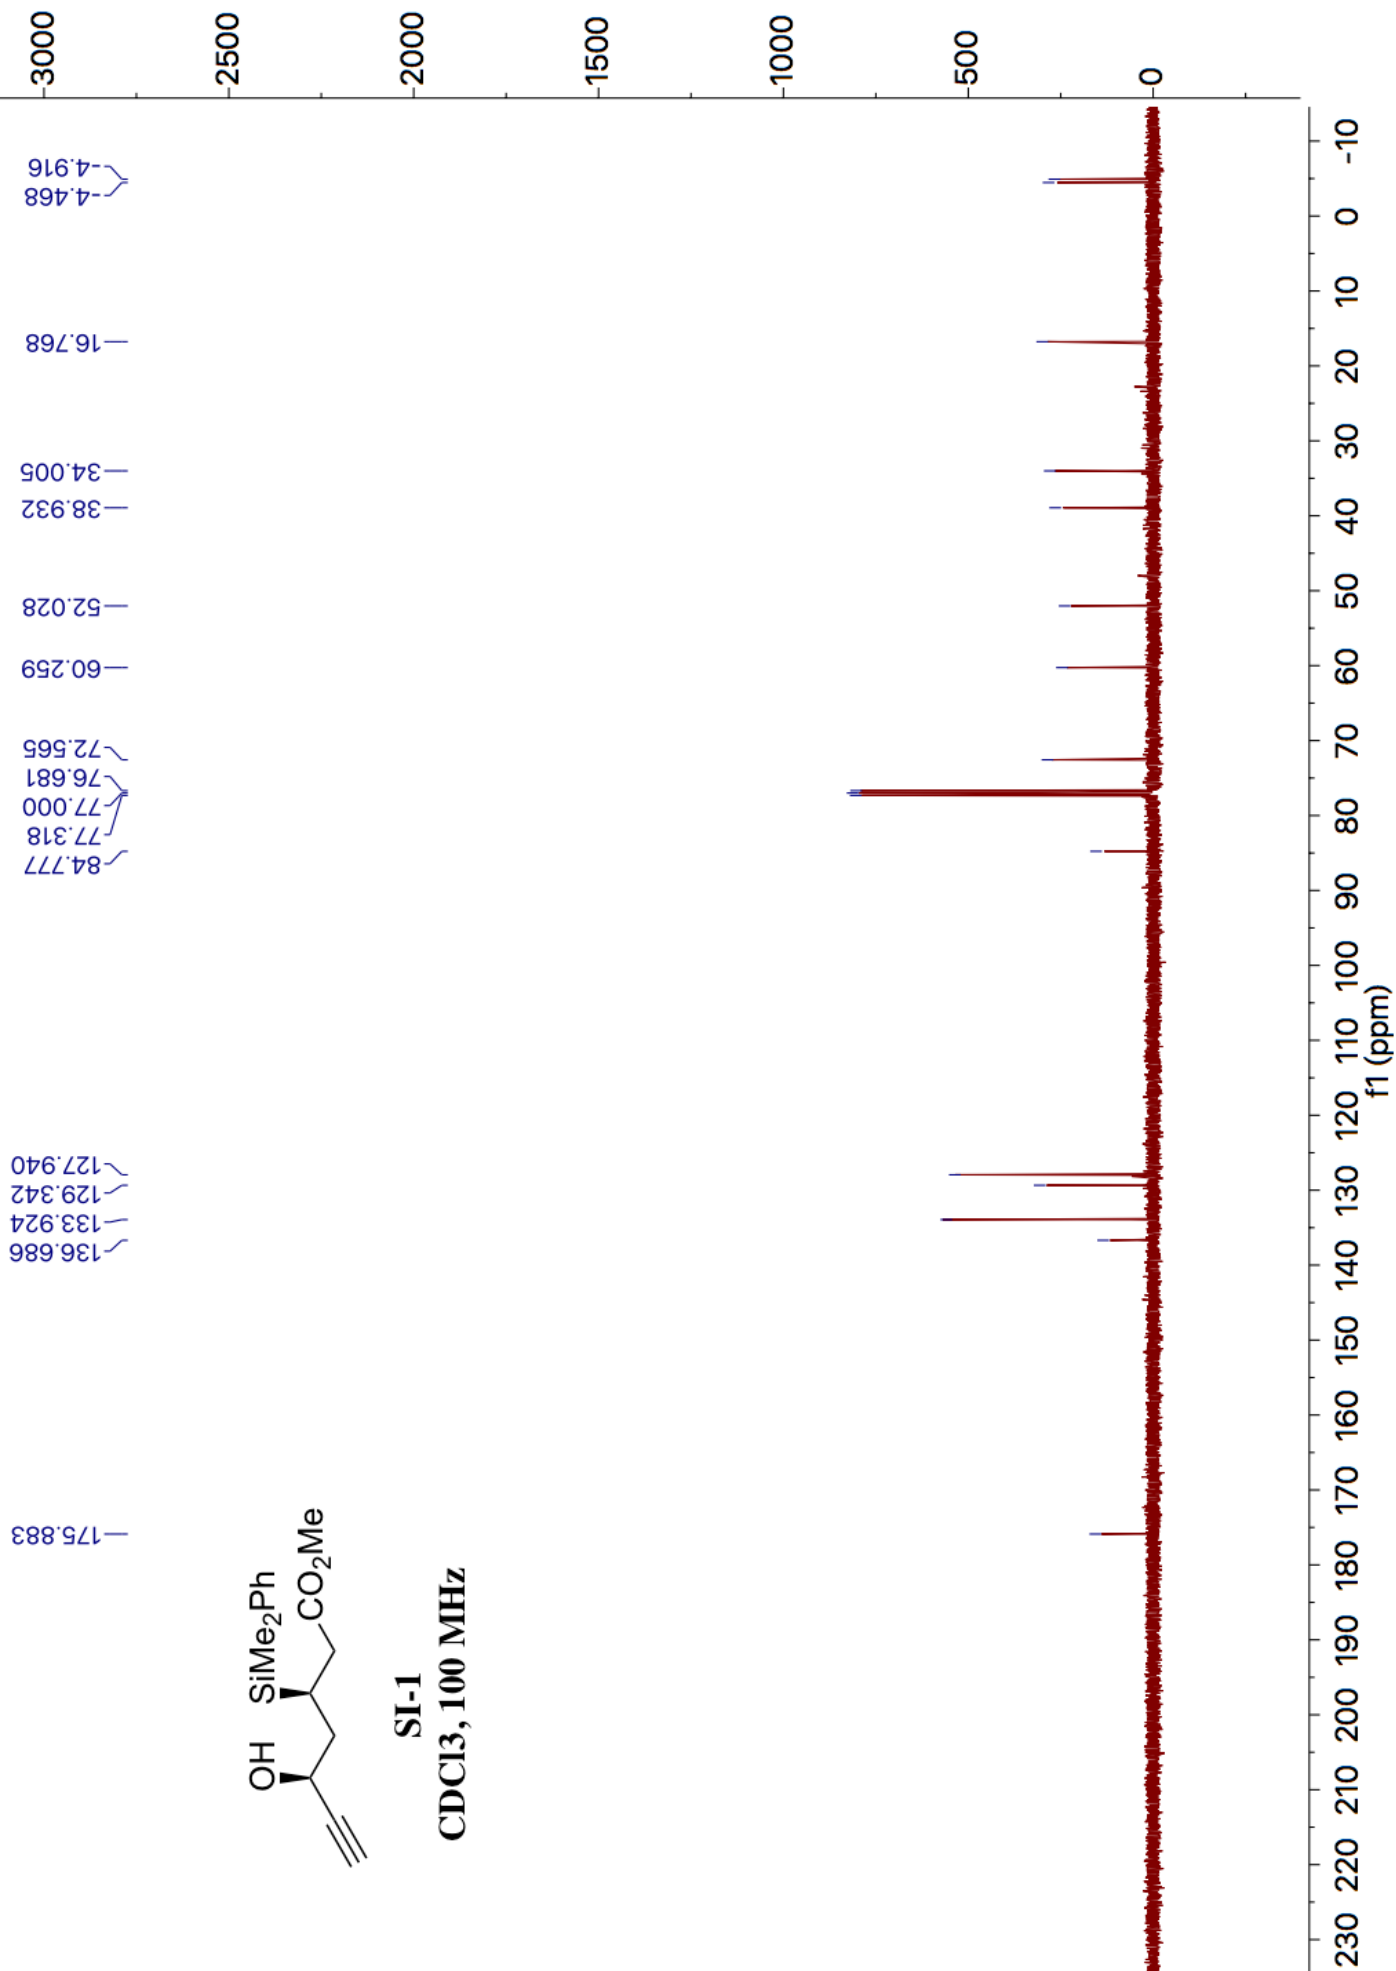

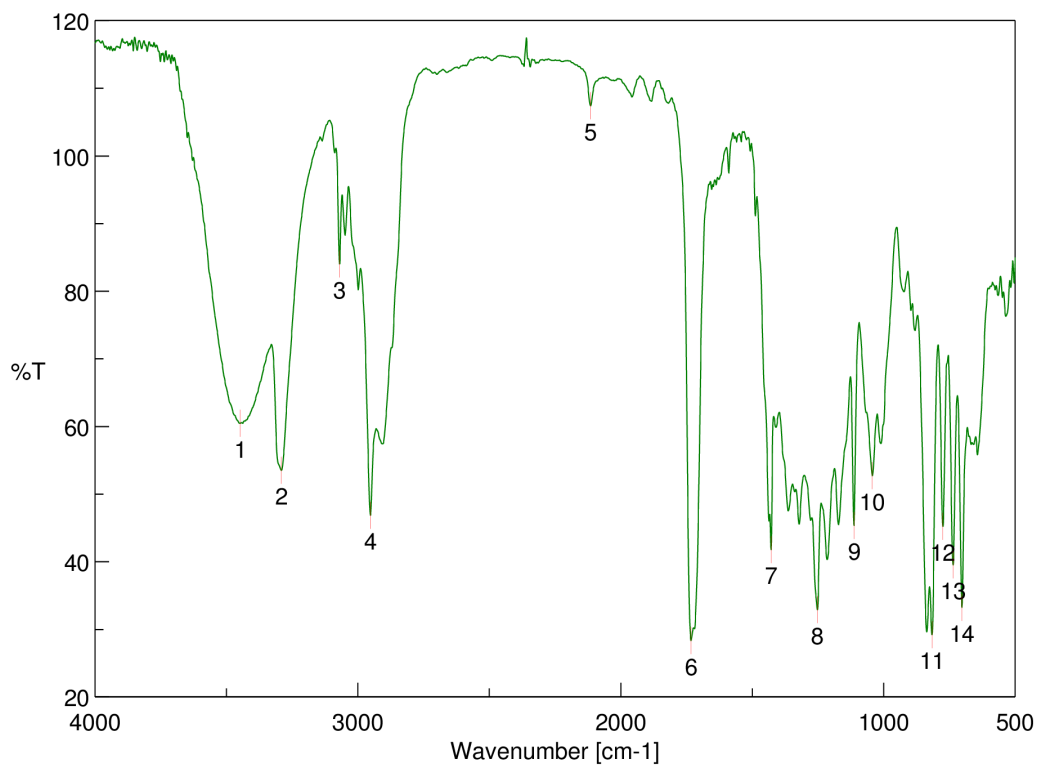

[ ピーク検出結果 ]

| No. | 位置      | 強度      | No. | 位置      | 強度      |
|-----|---------|---------|-----|---------|---------|
| 1   | 3448.1  | 60.4343 | 2   | 3290.93 | 53.482  |
| 3   | 3070.12 | 83.9826 | 4   | 2952.48 | 46.8548 |
| 5   | 2115.53 | 107.401 | 6   | 1732.73 | 28.3173 |
| 7   | 1428.03 | 41.7521 | 8   | 1252.54 | 32.9056 |
| 9   | 1112.73 | 45.3577 | 10  | 1043.3  | 52.6983 |
| 11  | 815.742 | 29.1785 | 12  | 775.244 | 45.2074 |
| 13  | 735.71  | 39.5002 | 14  | 701.962 | 33.2348 |

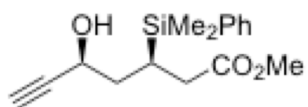

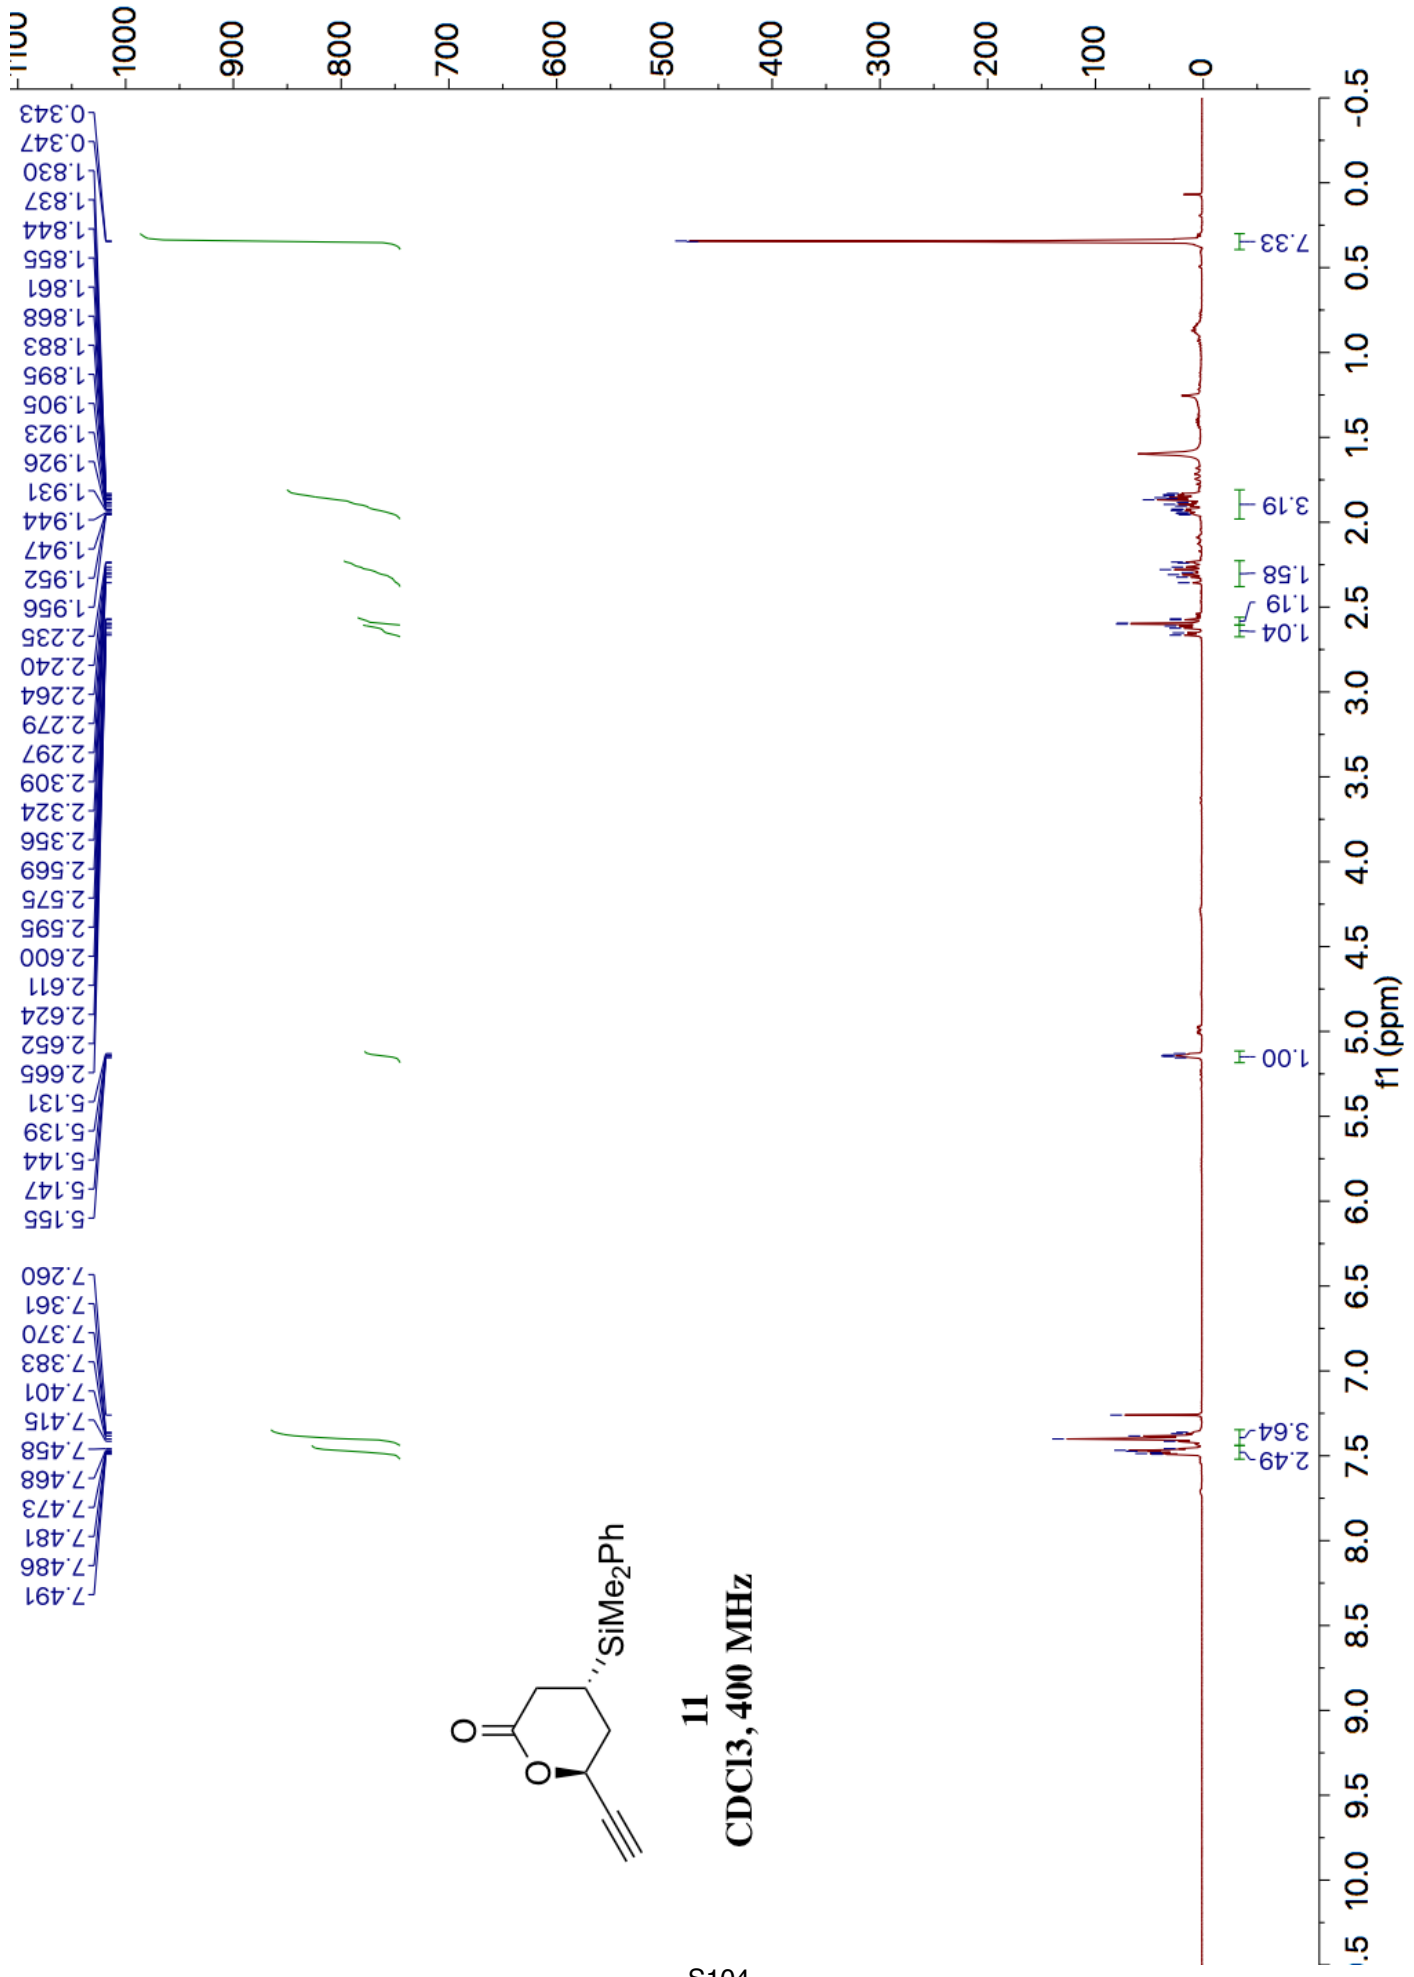

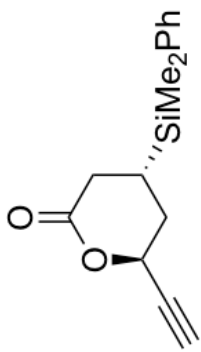

**11**  
CDCl<sub>3</sub>, 100 MHz

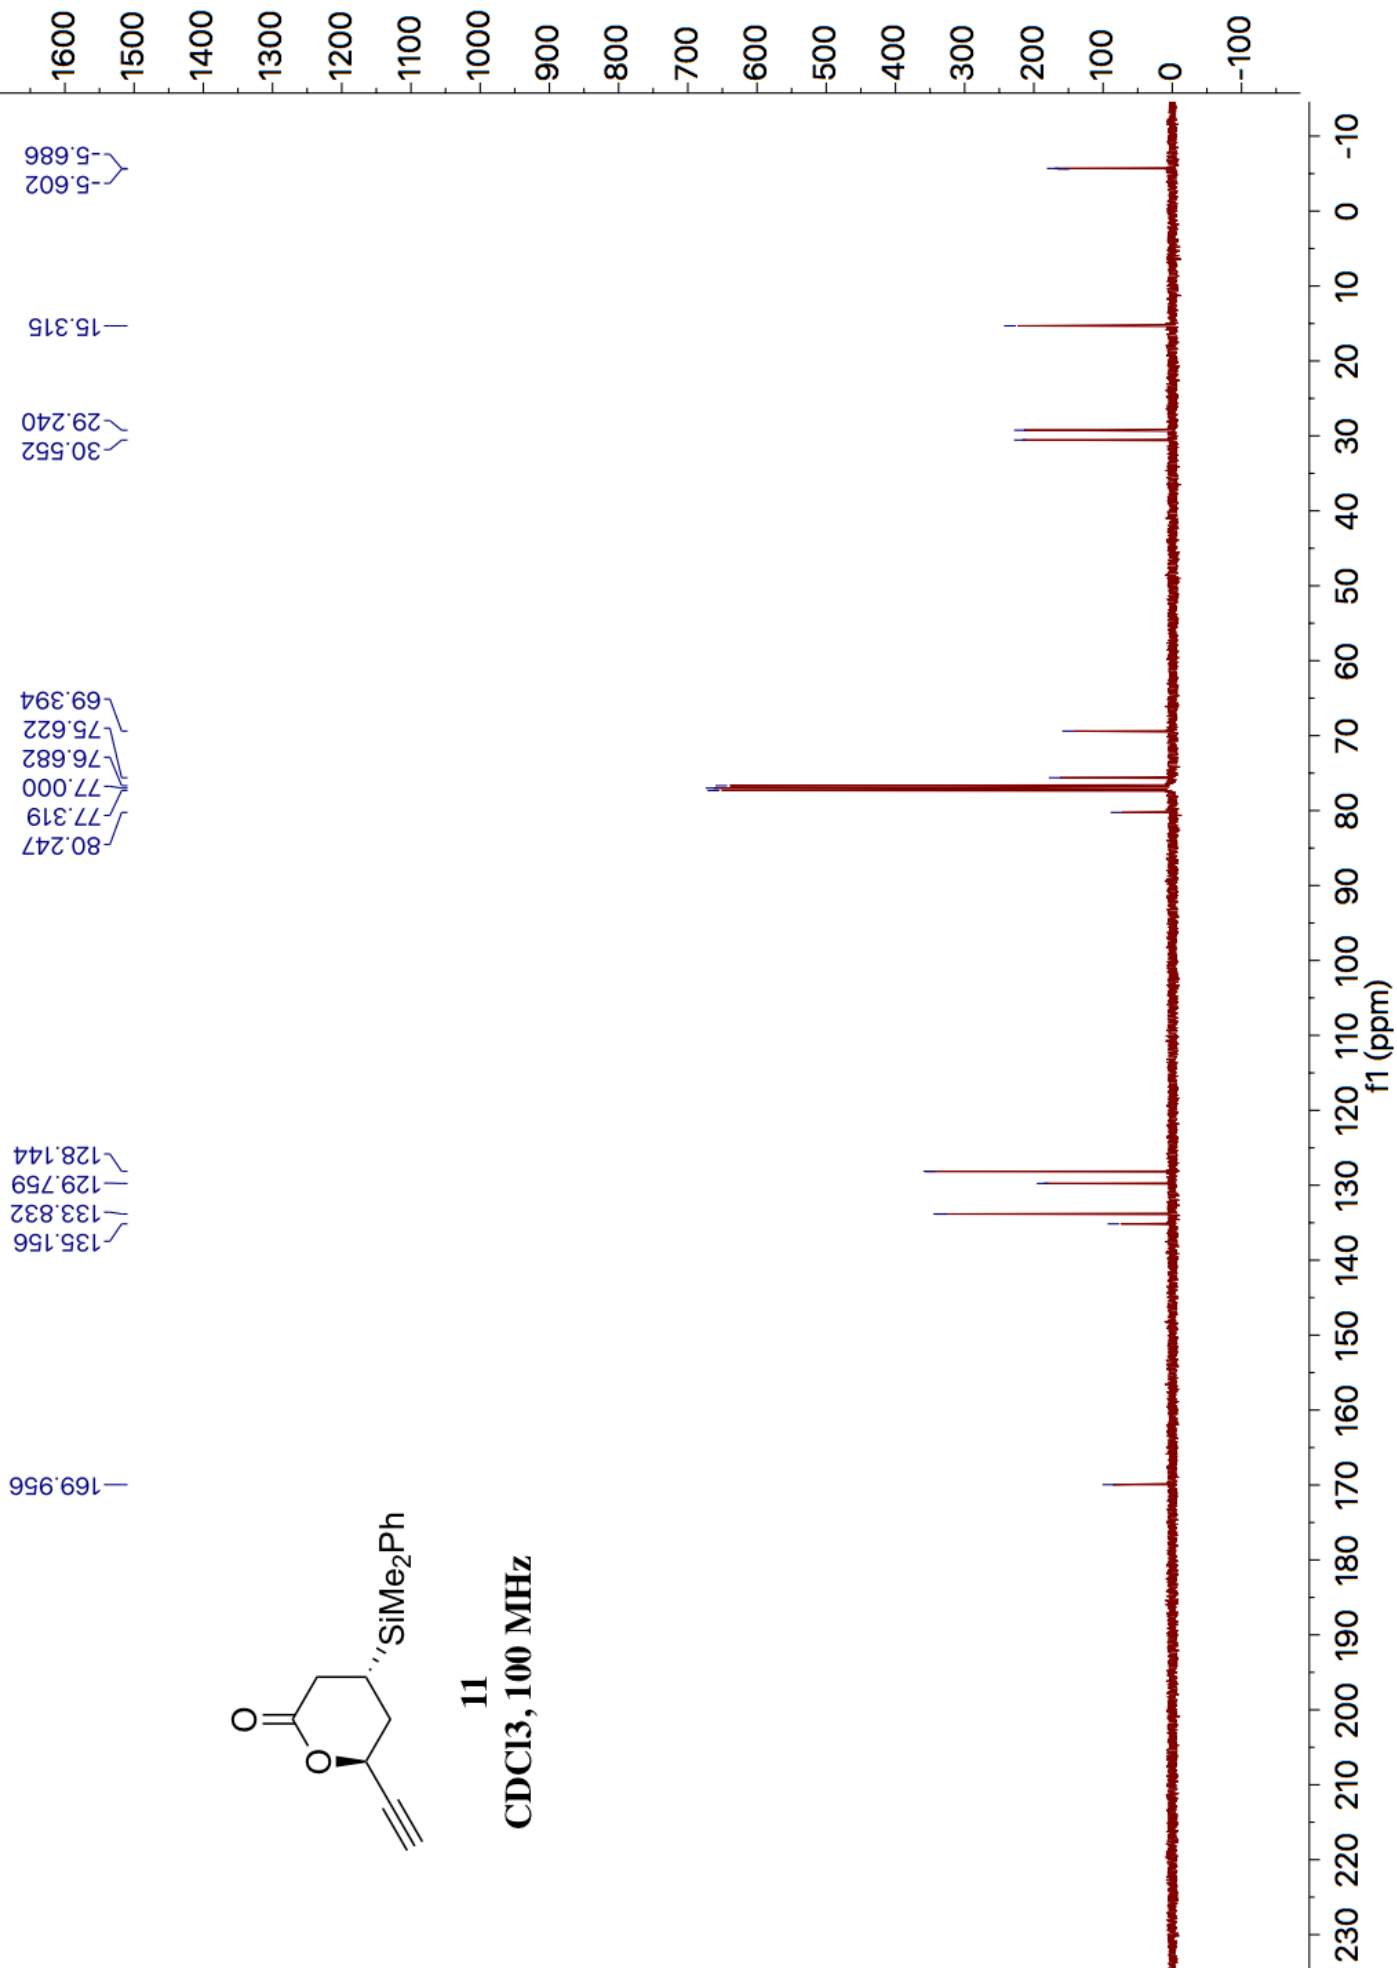

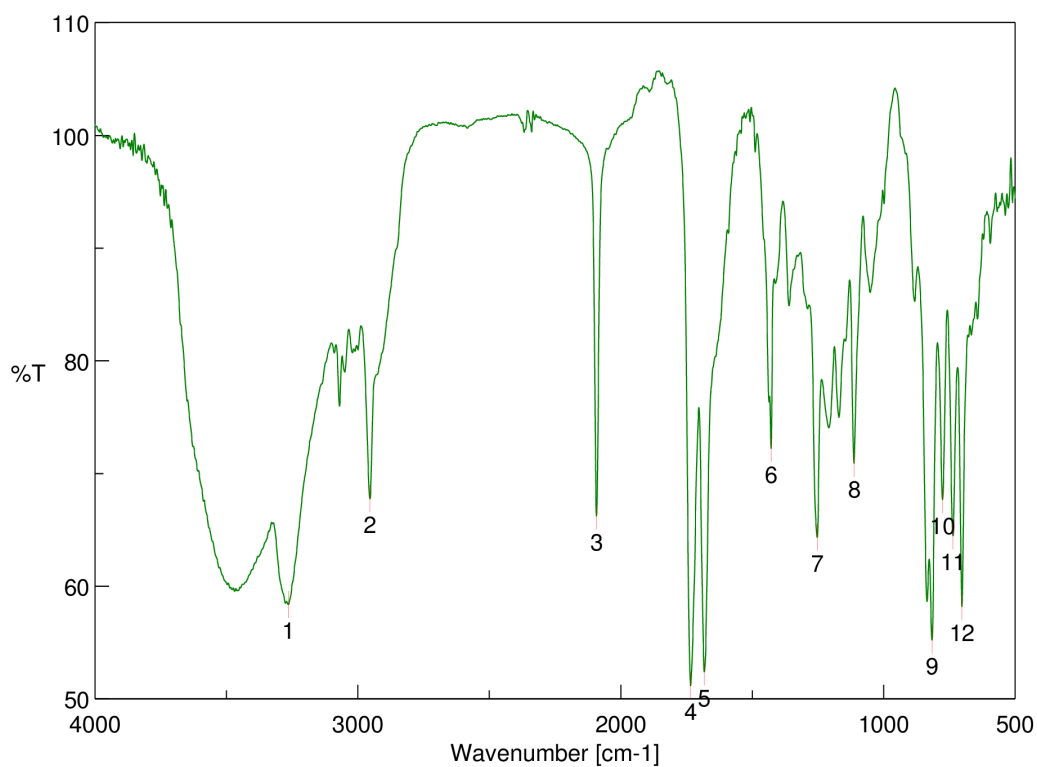

[ピーク検出結果]

| No. | 位置      | 強度      | No. | 位置      | 強度      |
|-----|---------|---------|-----|---------|---------|
| 1   | 3264.89 | 58.3741 | 2   | 2954.41 | 67.7418 |
| 3   | 2092.39 | 66.2368 | 4   | 1734.66 | 51.1806 |
| 5   | 1682.59 | 52.3871 | 6   | 1428.03 | 72.2198 |
| 7   | 1252.54 | 64.3294 | 8   | 1112.73 | 70.8925 |
| 9   | 815.742 | 55.2062 | 10  | 776.208 | 67.6755 |
| 11  | 736.674 | 64.471  | 12  | 701.962 | 58.1863 |

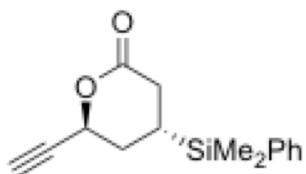

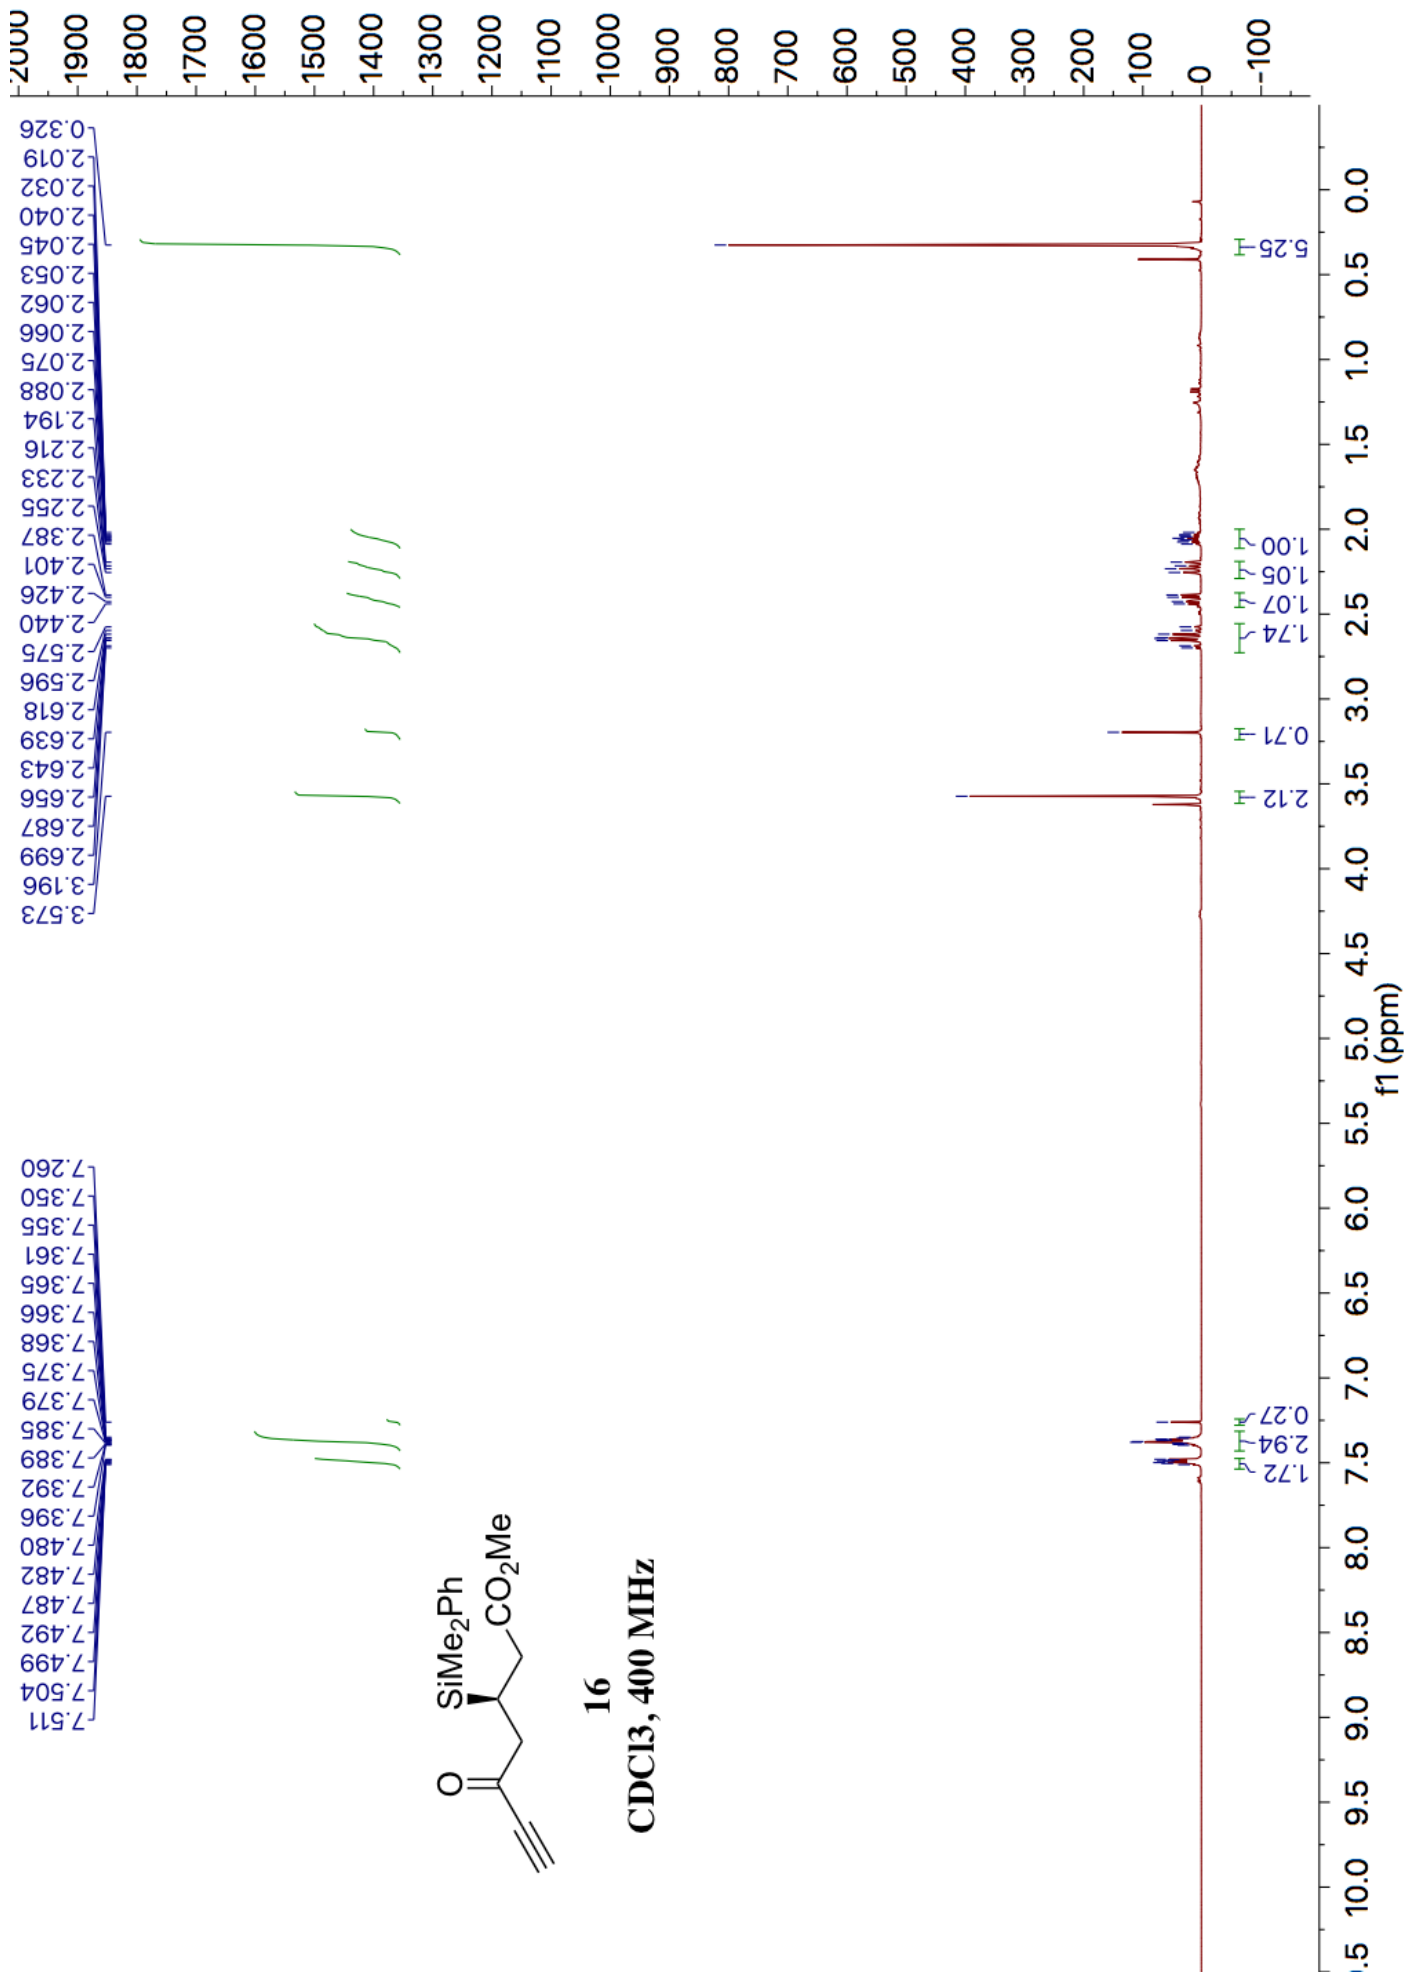

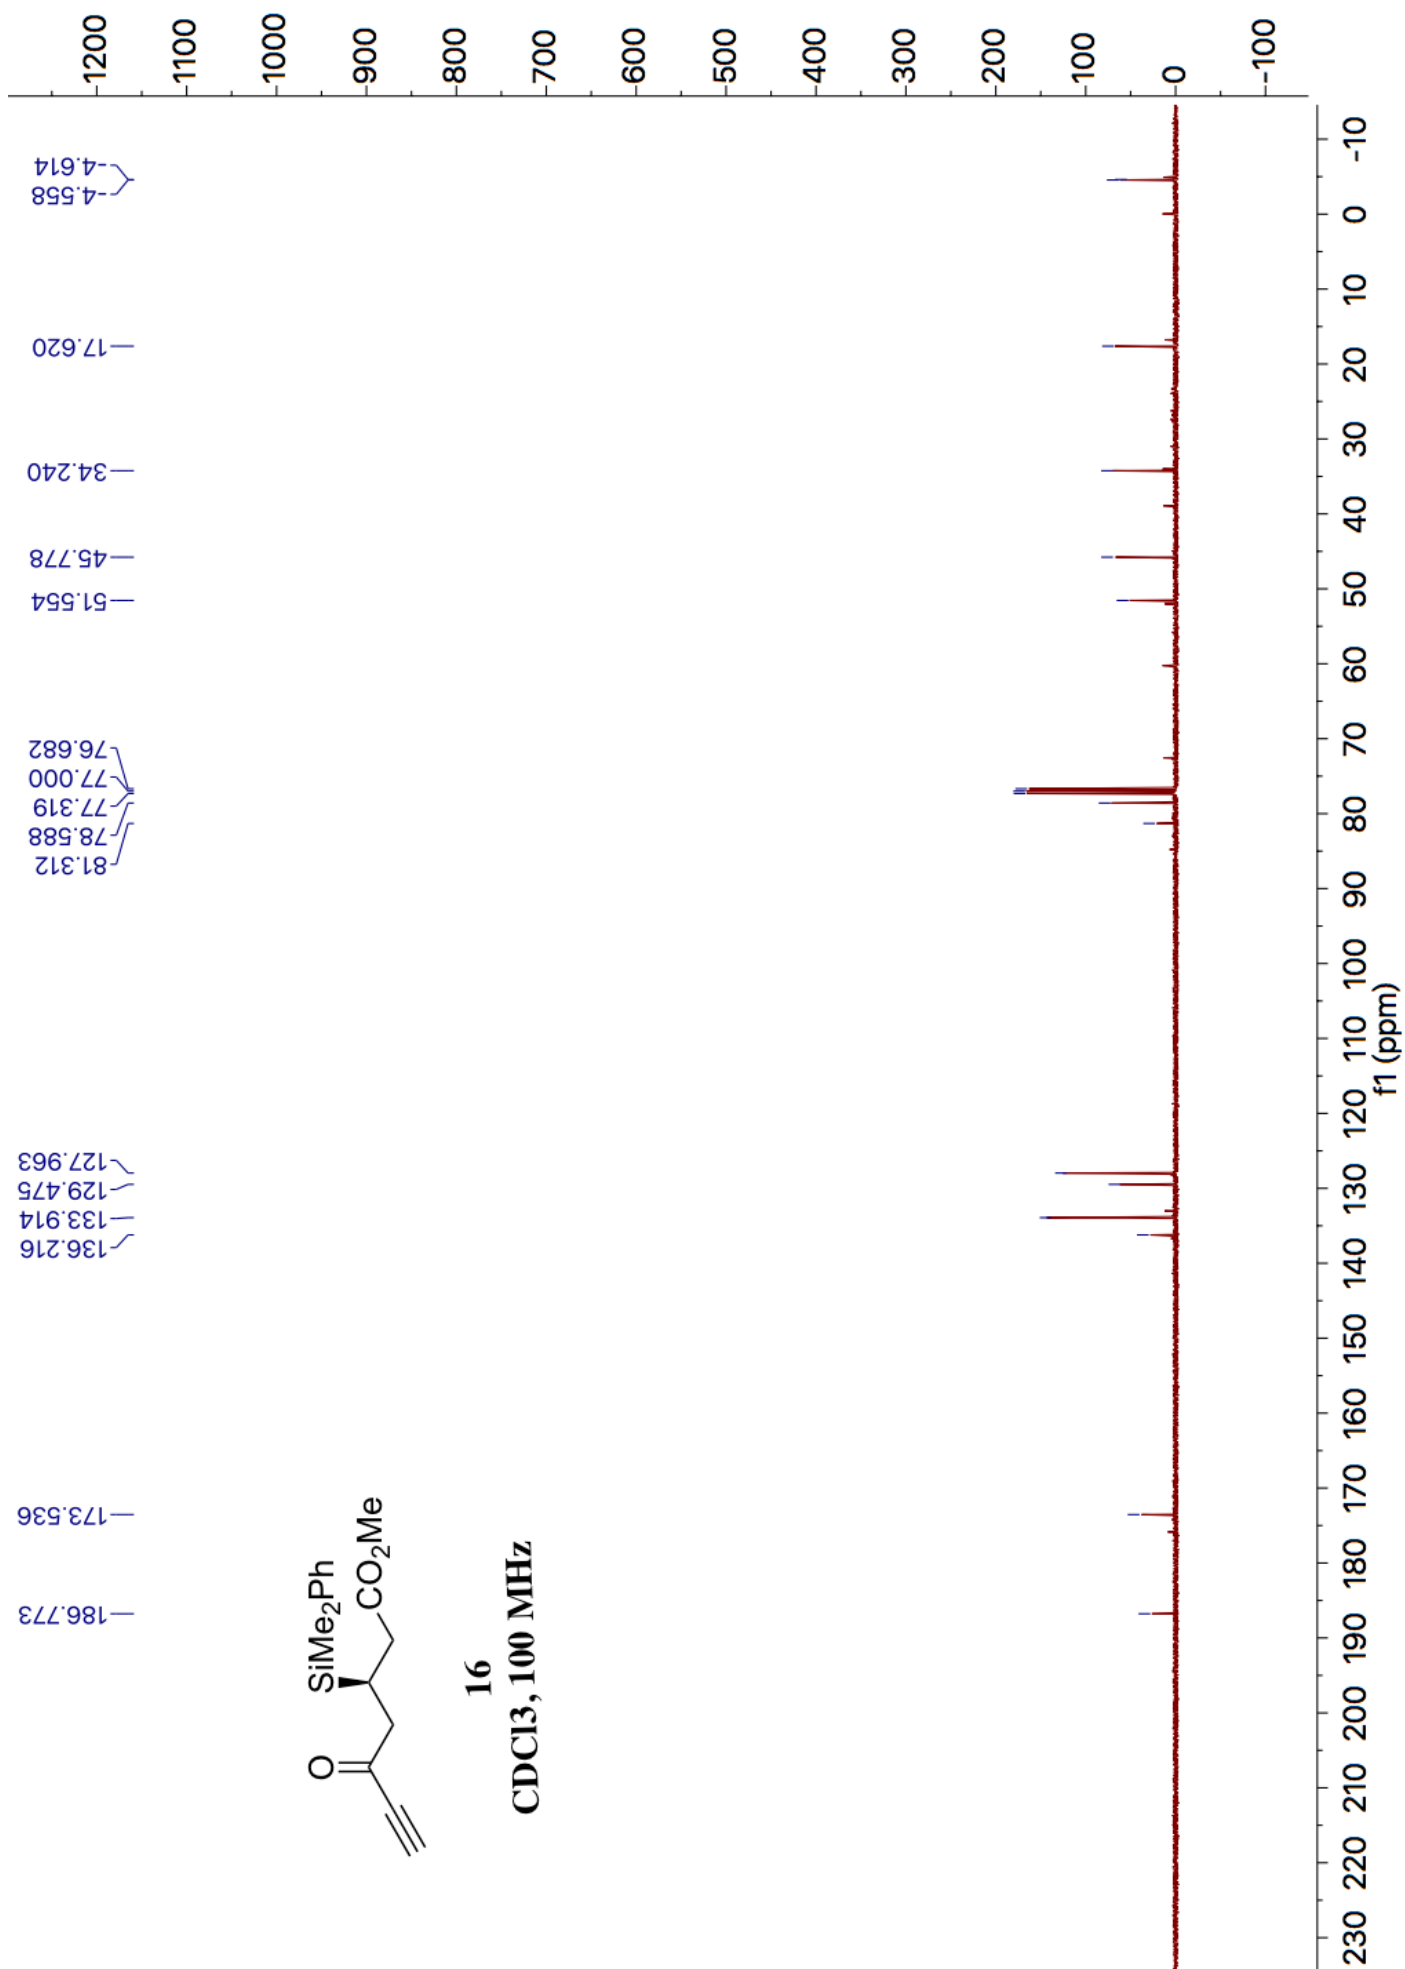



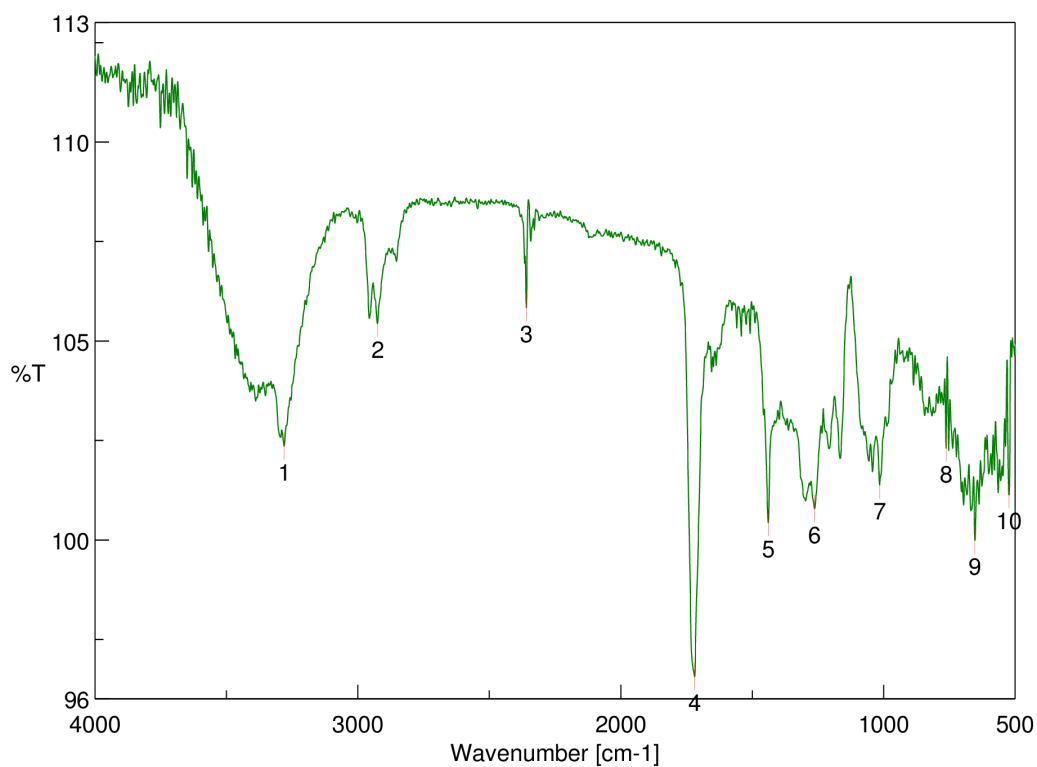

[ピーク検出結果]

| No. | 位置      | 強度      | No. | 位置      | 強度      |
|-----|---------|---------|-----|---------|---------|
| 1   | 3280.32 | 102.35  | 2   | 2925.48 | 105.435 |
| 3   | 2359.48 | 105.835 | 4   | 1719.23 | 96.5608 |
| 5   | 1438.64 | 100.429 | 6   | 1263.15 | 100.784 |
| 7   | 1015.34 | 101.38  | 8   | 762.709 | 102.304 |
| 9   | 652.786 | 99.9851 | 10  | 523.579 | 101.126 |

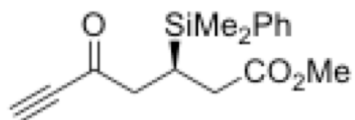

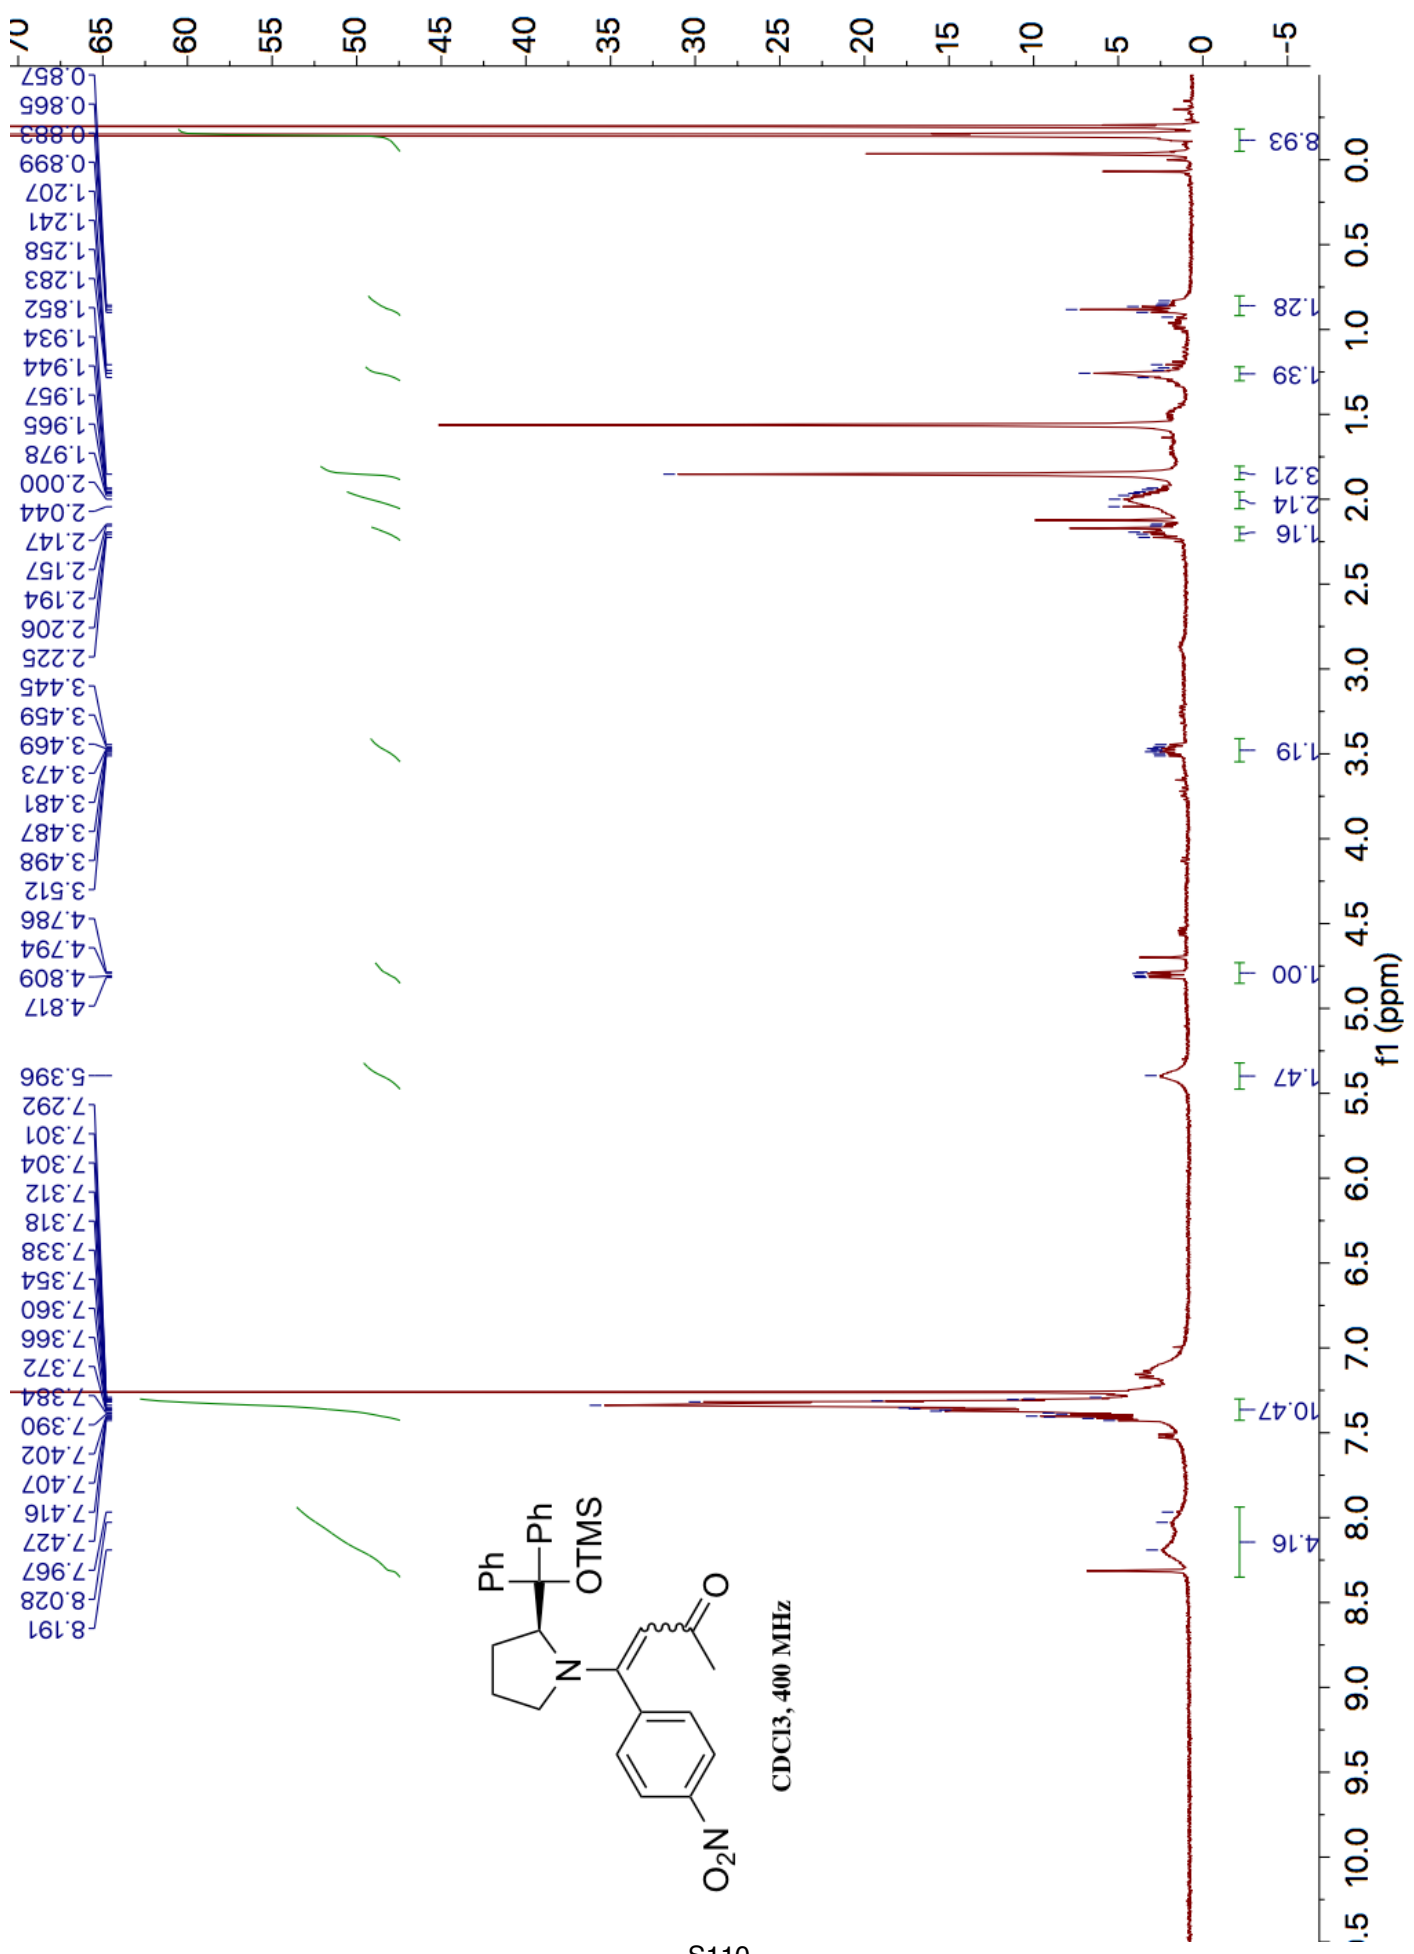

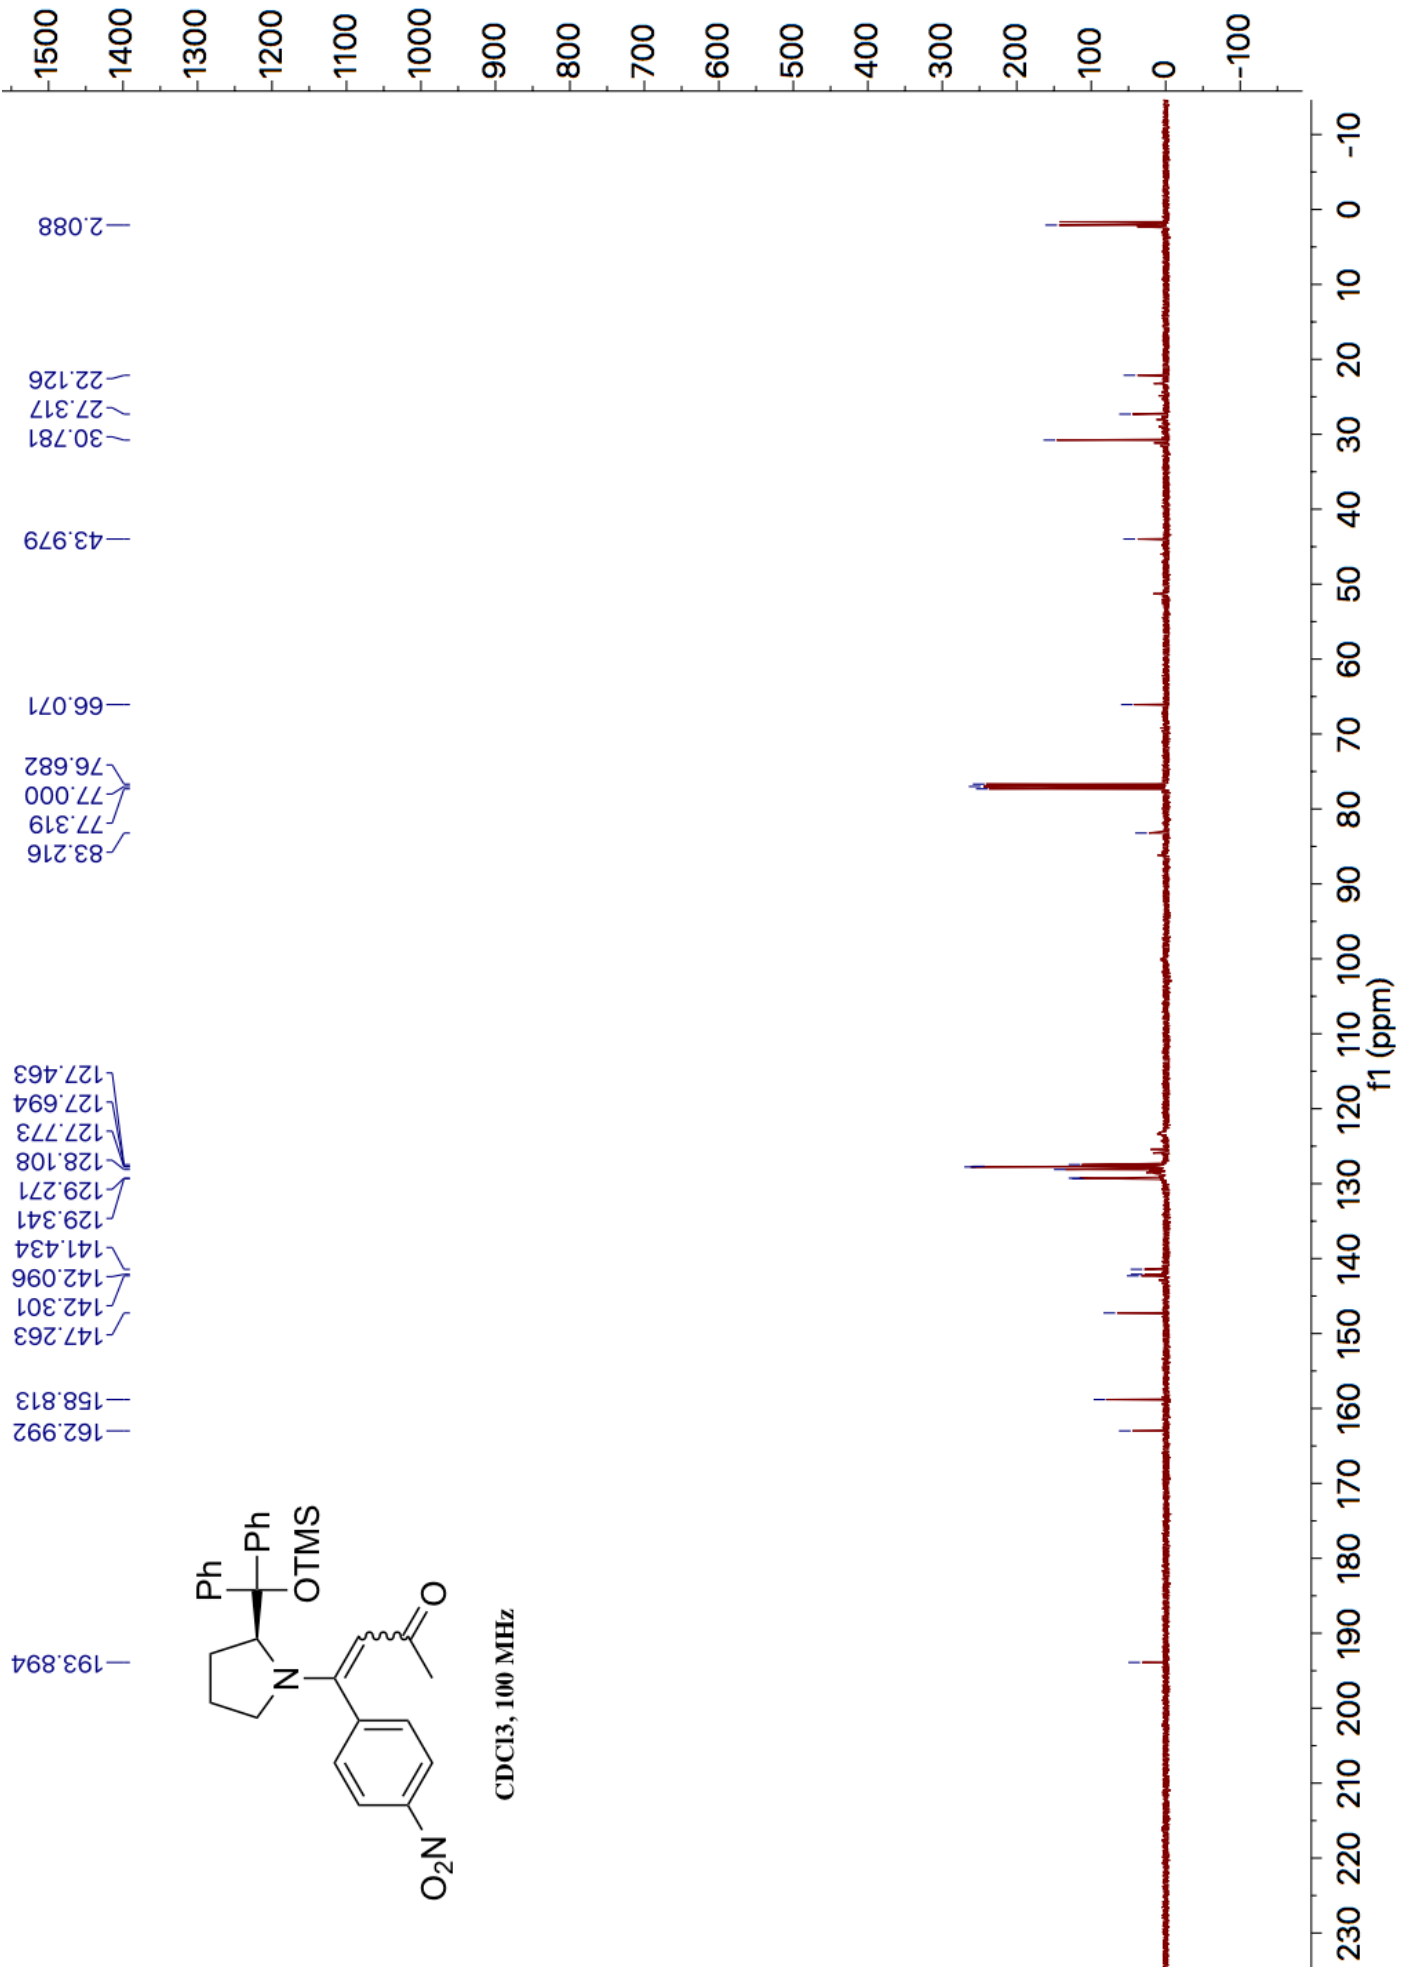

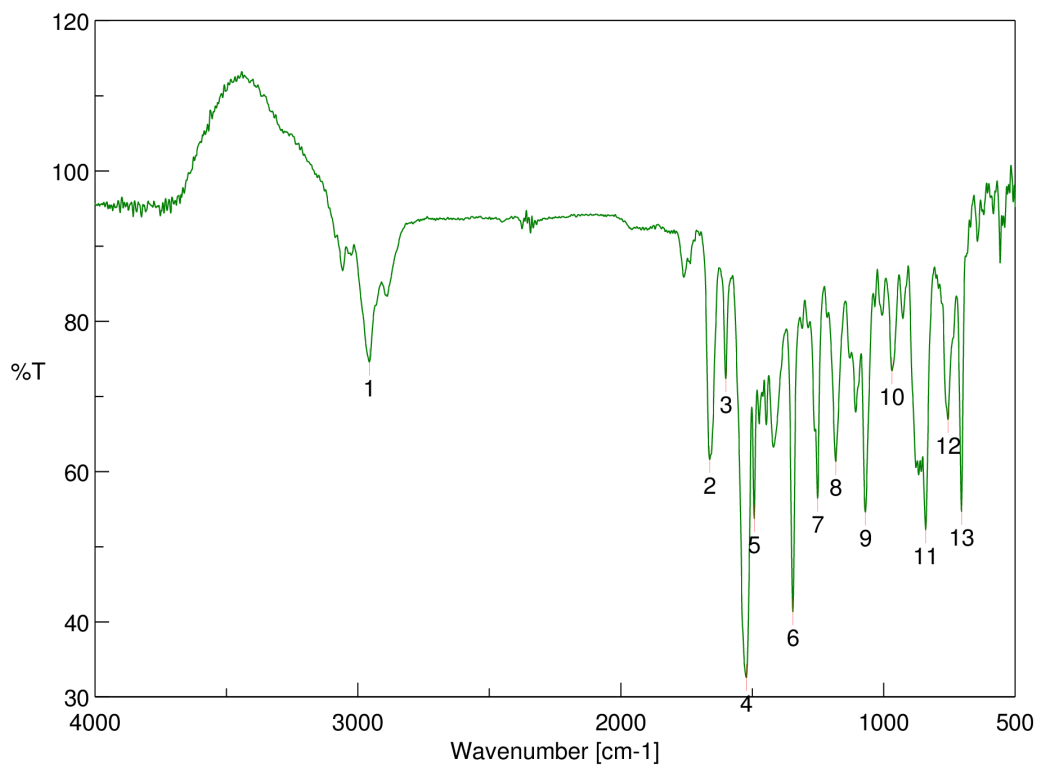

[ピーク検出結果]

| No. | 位置      | 強度      | No. | 位置      | 強度      |
|-----|---------|---------|-----|---------|---------|
| 1   | 2956.34 | 74.5878 | 2   | 1661.37 | 61.612  |
| 3   | 1600.63 | 72.3715 | 4   | 1522.52 | 32.5978 |
| 5   | 1492.63 | 53.7373 | 6   | 1345.11 | 41.365  |
| 7   | 1251.58 | 56.4595 | 8   | 1182.15 | 61.3301 |
| 9   | 1069.33 | 54.6235 | 10  | 969.055 | 73.3985 |
| 11  | 839.847 | 52.2597 | 12  | 754.995 | 66.9187 |
| 13  | 703.89  | 54.6881 |     |         |         |

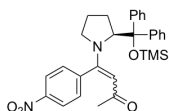

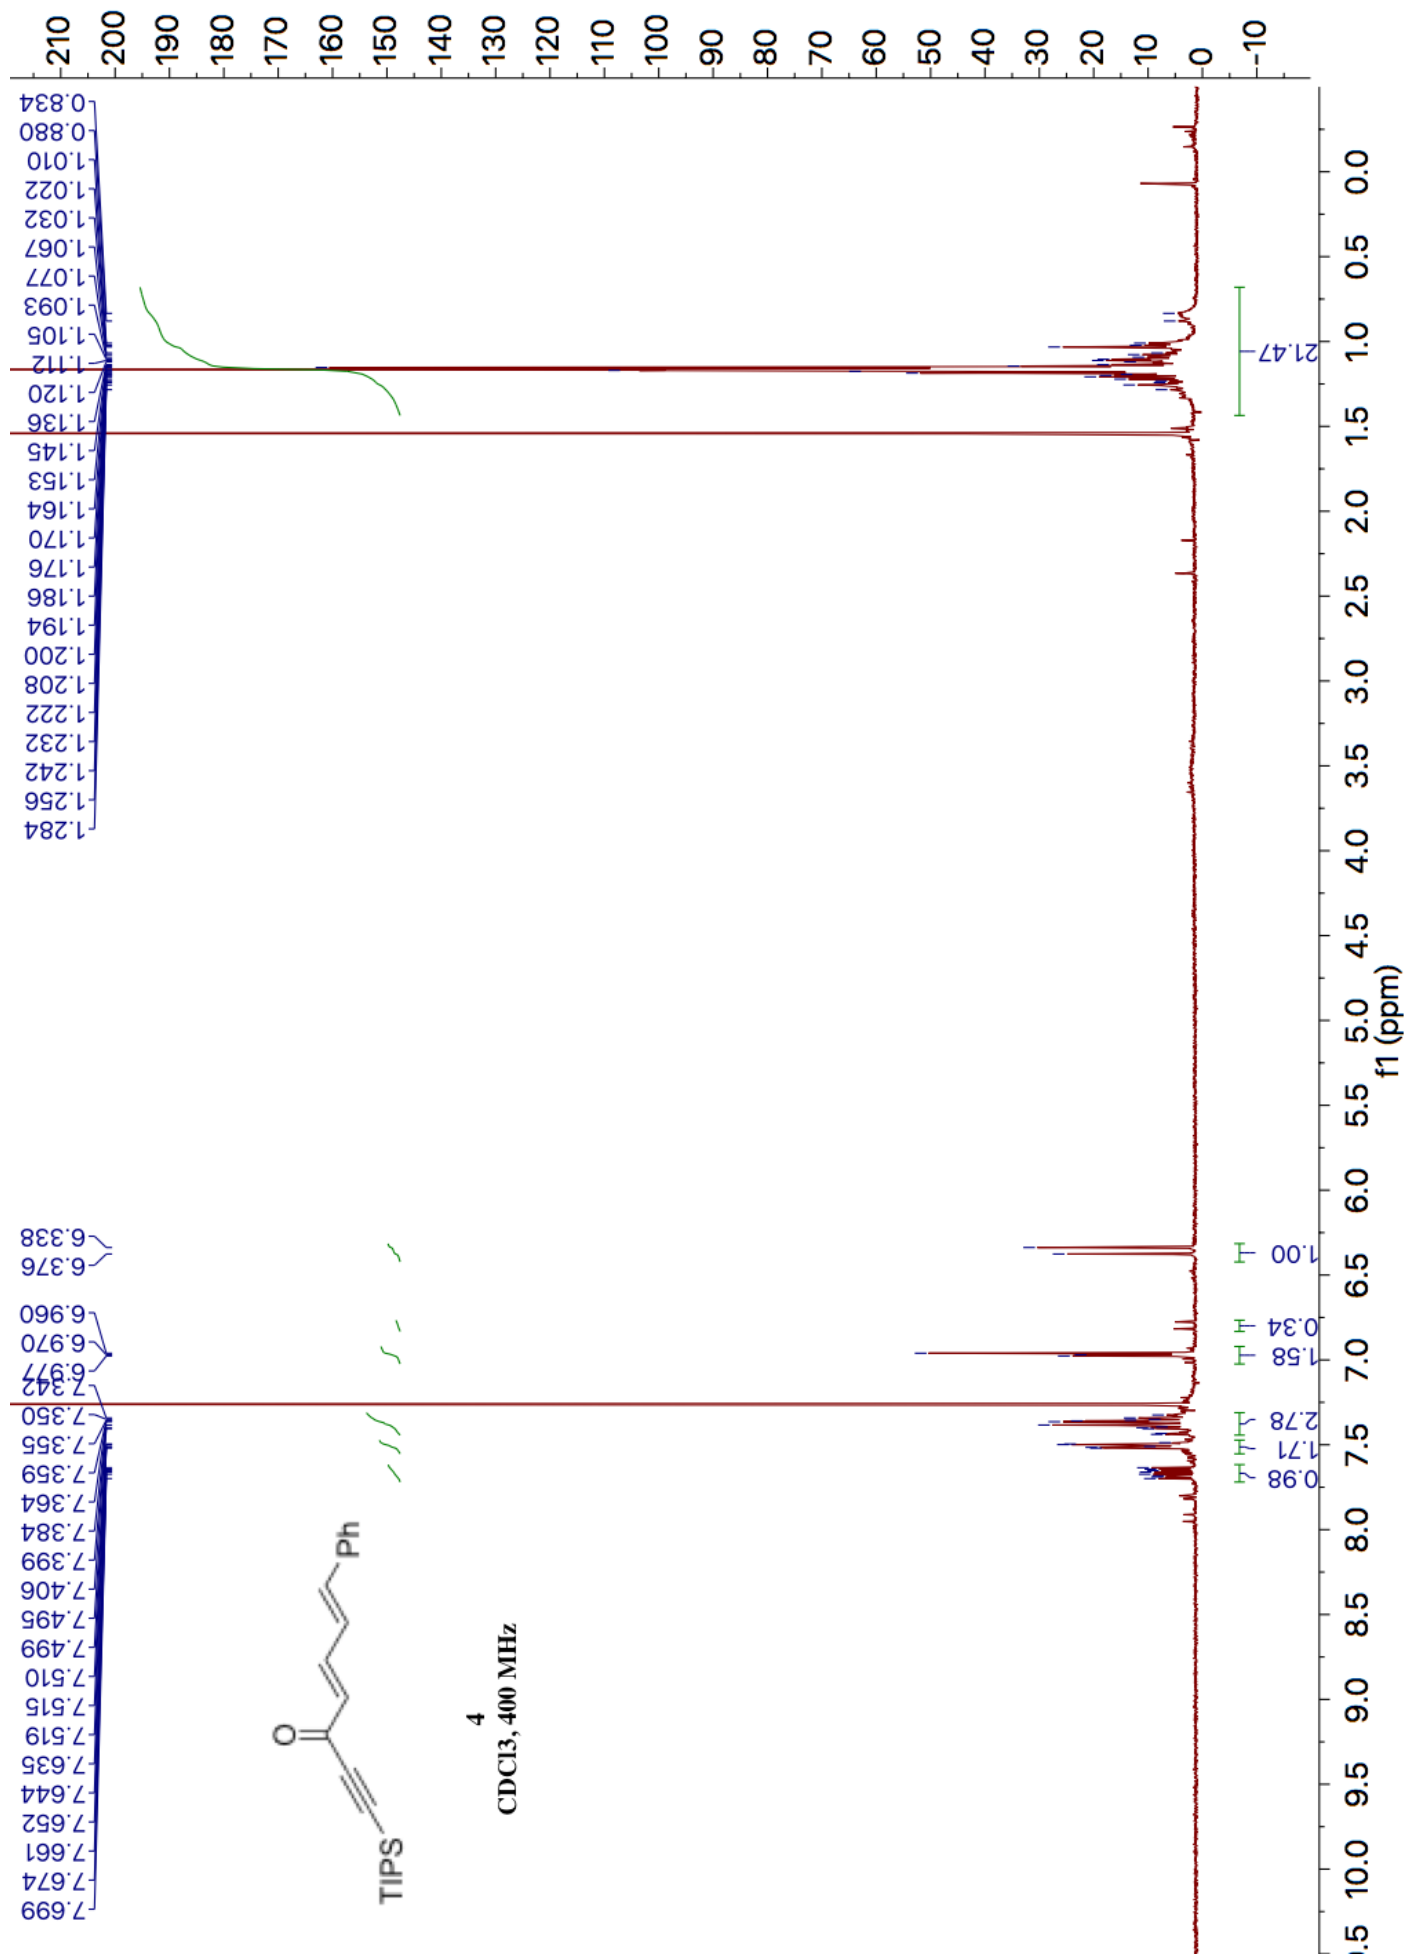

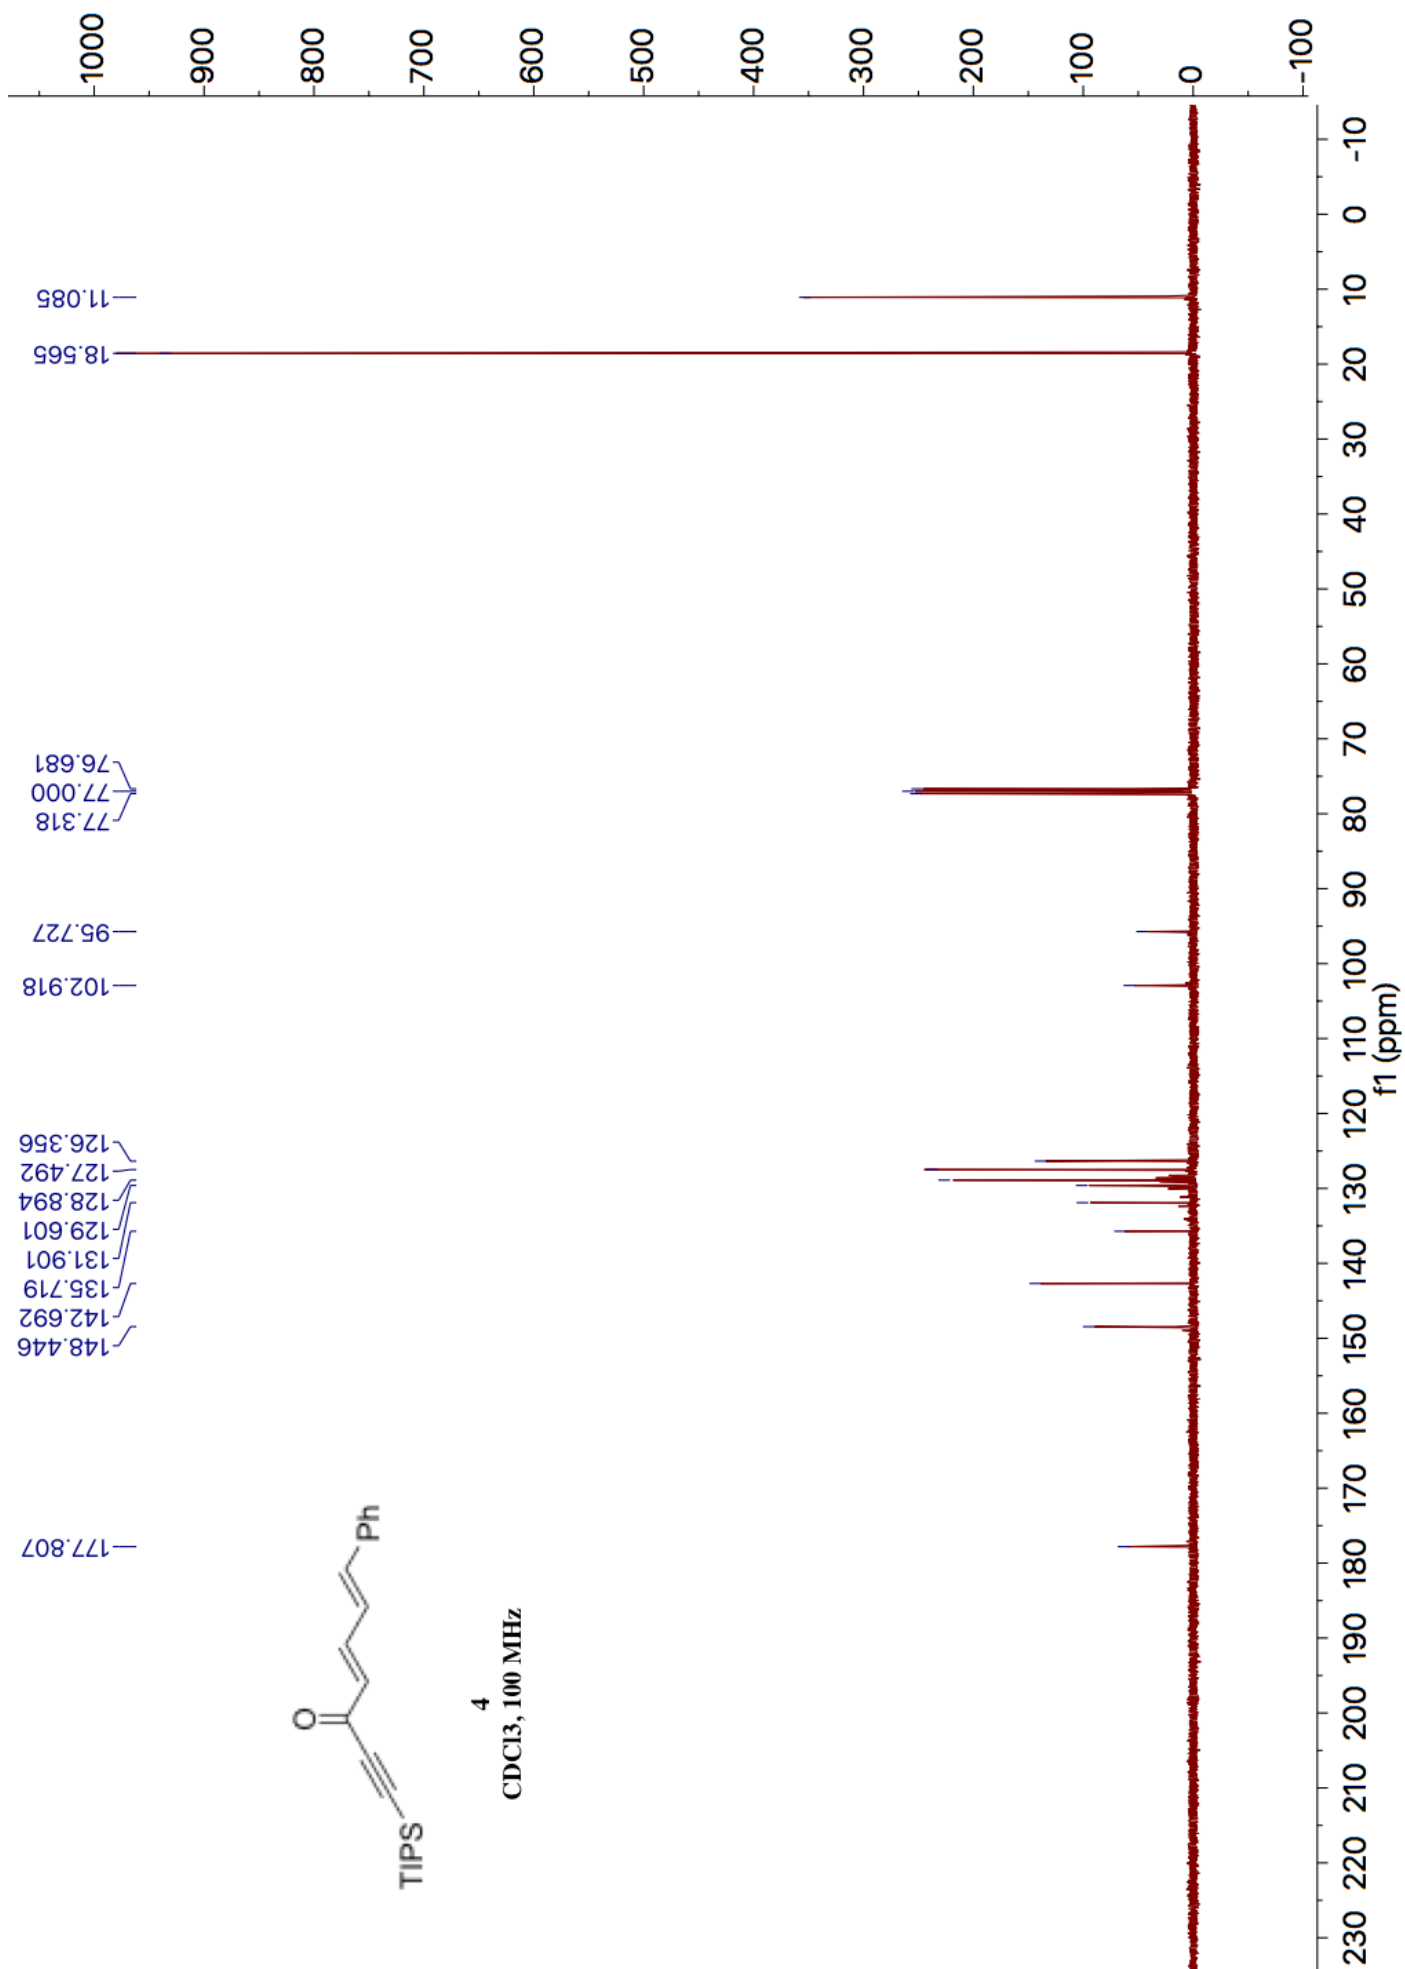

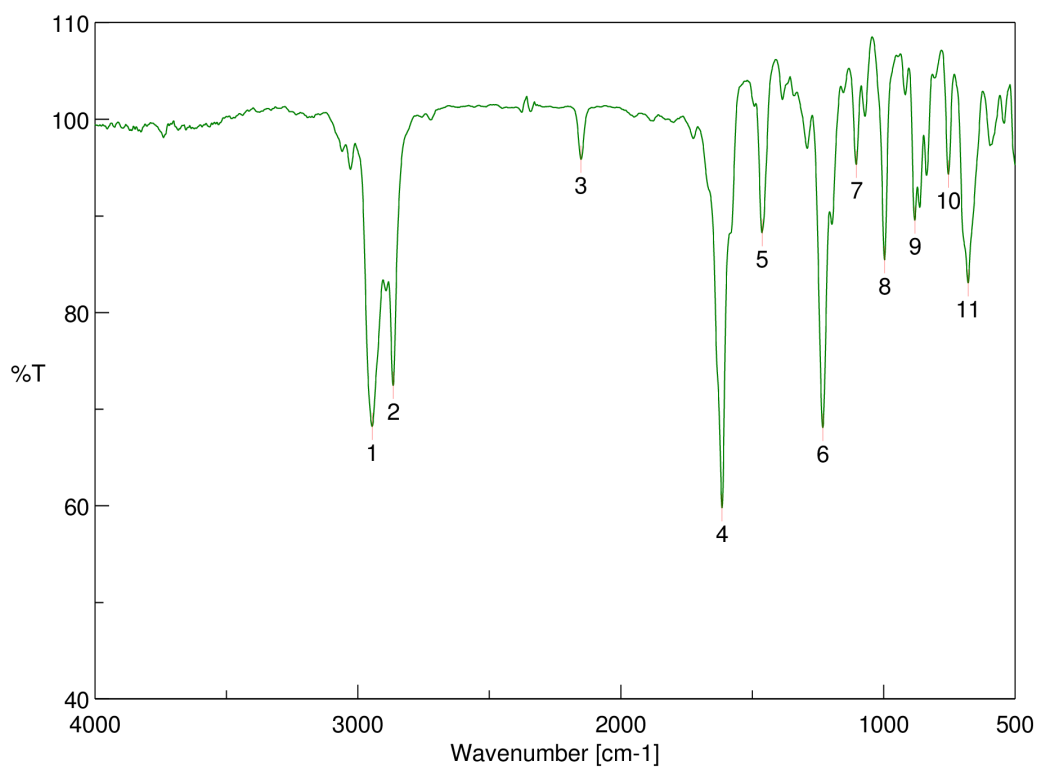

[ピーク検出結果]

| No. | 位置      | 強度      | No. | 位置      | 強度      |
|-----|---------|---------|-----|---------|---------|
| 1   | 2945.73 | 68.2095 | 2   | 2865.7  | 72.4437 |
| 3   | 2151.2  | 95.8311 | 4   | 1615.09 | 59.7909 |
| 5   | 1462.74 | 88.2471 | 6   | 1231.33 | 68.0951 |
| 7   | 1104.05 | 95.3236 | 8   | 997.017 | 85.4369 |
| 9   | 881.309 | 89.5574 | 10  | 754.031 | 94.2852 |
| 11  | 678.82  | 83.051  |     |         |         |

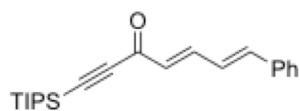

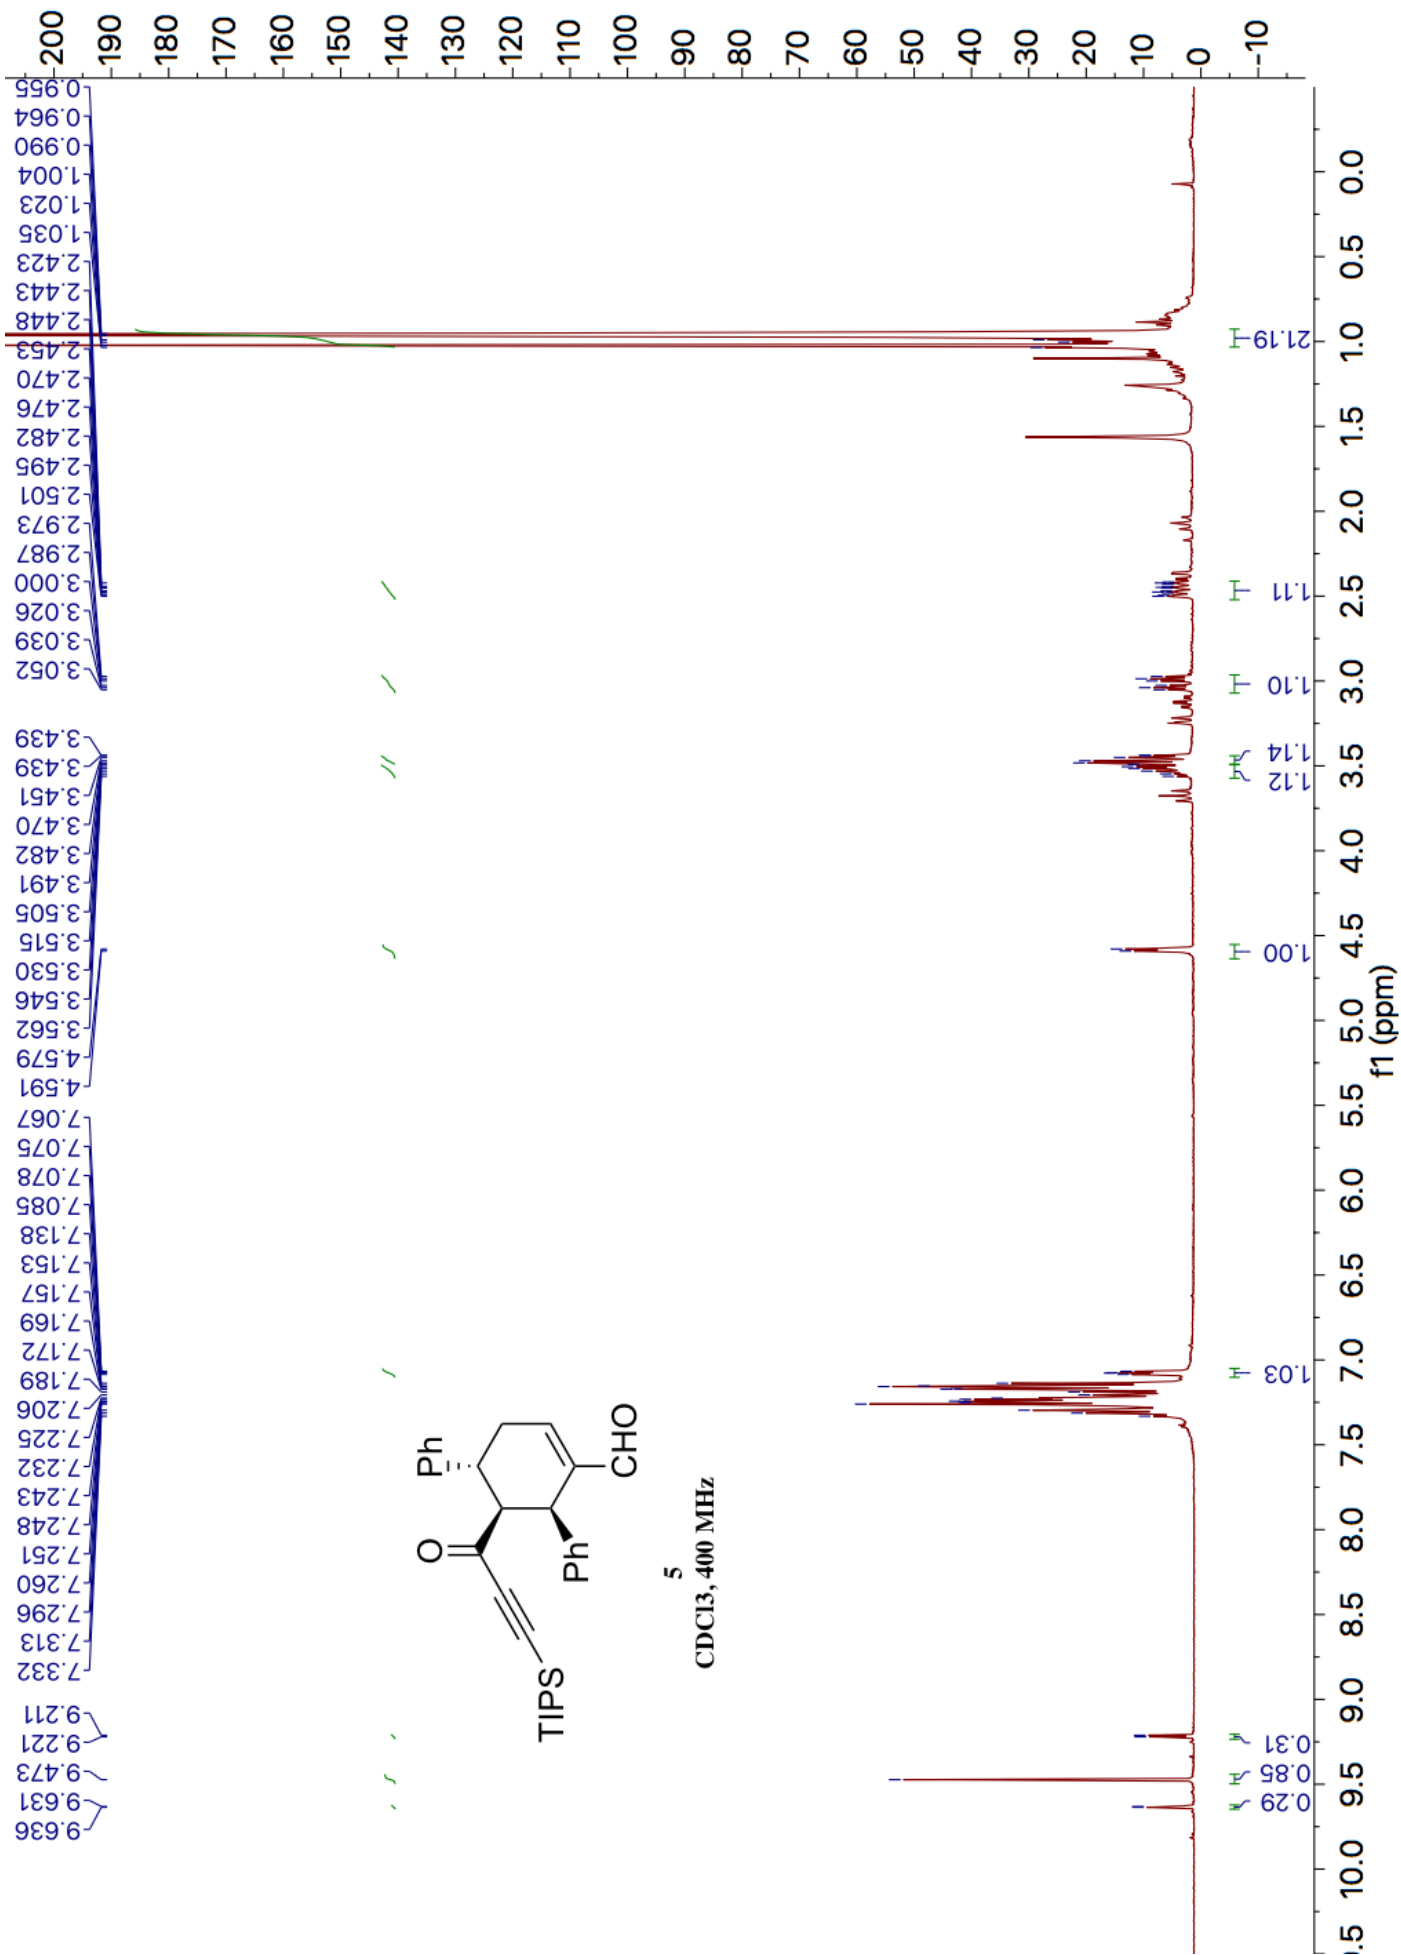



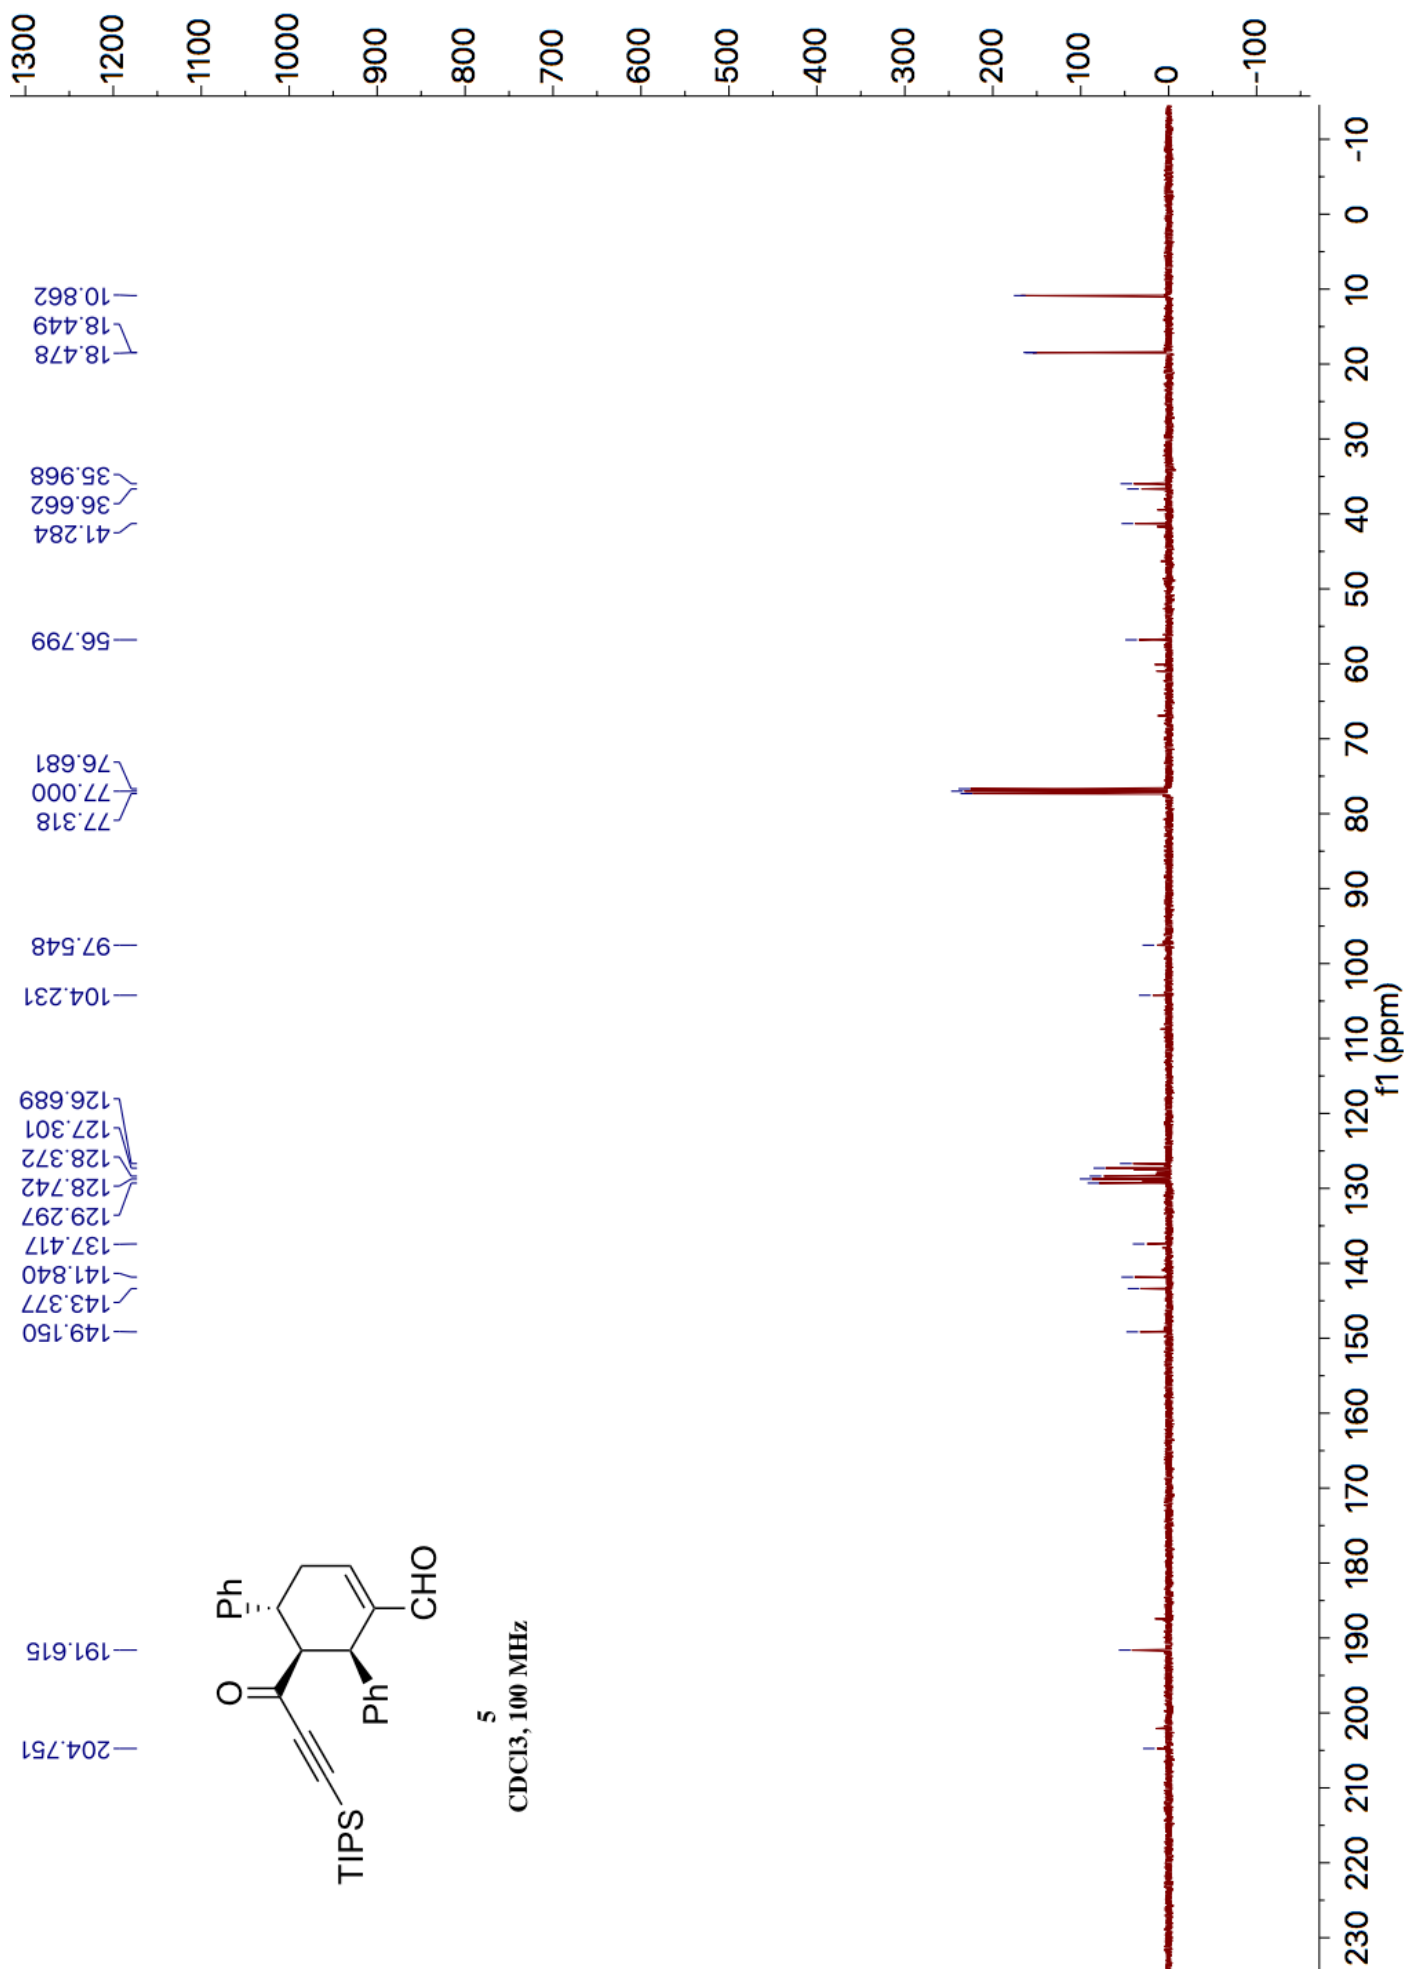

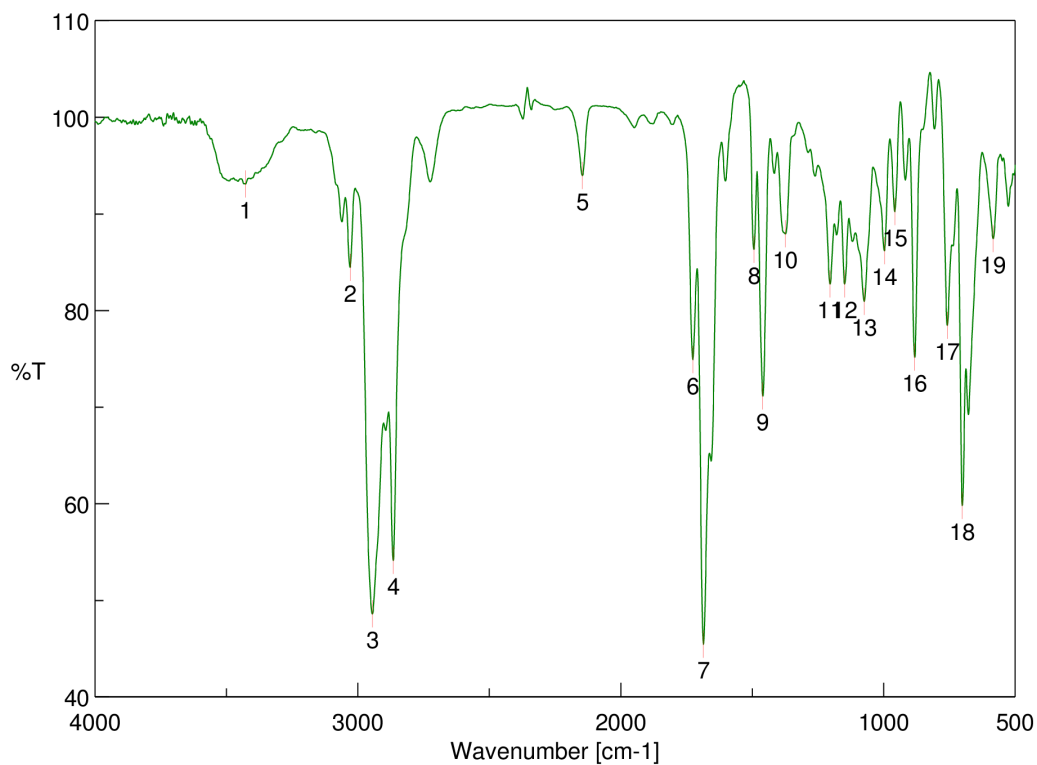

[ピーク検出結果]

| No. | 位置      | 強度      | No. | 位置      | 強度      |
|-----|---------|---------|-----|---------|---------|
| 1   | 3427.85 | 93.0799 | 2   | 3029.62 | 84.4673 |
| 3   | 2944.77 | 48.5802 | 4   | 2865.7  | 54.1167 |
| 5   | 2146.38 | 93.9593 | 6   | 1725.98 | 74.888  |
| 7   | 1685.48 | 45.4608 | 8   | 1493.6  | 86.3172 |
| 9   | 1459.85 | 71.1445 | 10  | 1374.03 | 87.9066 |
| 11  | 1204.33 | 82.7268 | 12  | 1148.4  | 82.734  |
| 13  | 1074.16 | 80.9327 | 14  | 997.017 | 86.1704 |
| 15  | 957.484 | 90.2174 | 16  | 882.274 | 75.1639 |
| 17  | 757.888 | 78.4606 | 18  | 700.998 | 59.8131 |
| 19  | 583.361 | 87.4175 |     |         |         |

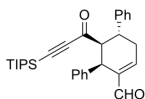

Supplement: gg1c00054_si_001.pdf [file gg1c00054_si_001.pdf]
